# Supplementary material for: Identifying Proteins and Amino Acids Associated with Liver Cancer Risk: A Study Utilizing Mendelian Randomization and Bulk RNA Sequencing Analysis
Source: J Pers Med. 2024 Feb 28;14(3):262. doi: 10.3390/jpm14030262 (PMC10970996; doi:10.3390/jpm14030262)
Supplement: Supplementary file 1 [file jpm-14-00262-s001.zip › Supplementary tables Table S2.xlsx]

## Sheet: Protein_PLC_harmonised_final
SNP	effect_allele.exposure	other_allele.exposure	effect_allele.outcome	other_allele.outcome	beta.exposure	beta.outcome	se.outcome	pval.outcome	id.exposure	pval.exposure	se.exposure	mr_keep	F
rs1354034	C	T	C	T	0.0547	0.0002	0.0896	0.9983	DHRS9	5.01e-11	0.008325	TRUE	43.1724
rs1354034	C	T	C	T	0.0547	0.0002	0.0896	0.9983	DHRS9	5.01e-11	0.008325	TRUE	43.1724
rs1354034	C	T	C	T	0.0547	0.0002	0.0896	0.9983	DHRS9	5.01e-11	0.008325	TRUE	43.1724
rs1354034	C	T	C	T	0.0547	0.0002	0.0896	0.9983	DHRS9	5.01e-11	0.008325	TRUE	43.1724
rs1354034	C	T	C	T	0.0547	0.0002	0.0896	0.9983	DHRS9	5.01e-11	0.008325	TRUE	43.1724
rs1354034	C	T	C	T	0.06	0.0002	0.0896	0.9983	SH3BGRL3	5.18e-13	0.00831	TRUE	52.1315
rs1354034	C	T	C	T	0.06	0.0002	0.0896	0.9983	SH3BGRL3	5.18e-13	0.00831	TRUE	52.1315
rs1354034	C	T	C	T	0.06	0.0002	0.0896	0.9983	SH3BGRL3	5.18e-13	0.00831	TRUE	52.1315
rs1354034	C	T	C	T	0.06	0.0002	0.0896	0.9983	SH3BGRL3	5.18e-13	0.00831	TRUE	52.1315
rs1354034	C	T	C	T	0.06	0.0002	0.0896	0.9983	SH3BGRL3	5.18e-13	0.00831	TRUE	52.1315
rs62502119	T	C	T	C	-0.2266	-0.0027	0.5038	0.9957	LGALS3BP	7.4e-13	0.031596	TRUE	51.4346
rs62502119	T	C	T	C	-0.2266	-0.0027	0.5038	0.9957	LGALS3BP	7.4e-13	0.031596	TRUE	51.4346
rs62502119	T	C	T	C	-0.2266	-0.0027	0.5038	0.9957	LGALS3BP	7.4e-13	0.031596	TRUE	51.4346
rs62502119	T	C	T	C	-0.2266	-0.0027	0.5038	0.9957	LGALS3BP	7.4e-13	0.031596	TRUE	51.4346
rs62502119	T	C	T	C	-0.2266	-0.0027	0.5038	0.9957	LGALS3BP	7.4e-13	0.031596	TRUE	51.4346
rs62048008	G	A	G	A	-0.1674	0.0014	0.1745	0.9935	HP	1.13e-33	0.013841	TRUE	146.277
rs62048008	G	A	G	A	-0.1674	0.0014	0.1745	0.9935	HP	1.13e-33	0.013841	TRUE	146.277
rs62048008	G	A	G	A	-0.1674	0.0014	0.1745	0.9935	HP	1.13e-33	0.013841	TRUE	146.277
rs62048008	G	A	G	A	-0.1674	0.0014	0.1745	0.9935	HP	1.13e-33	0.013841	TRUE	146.277
rs62048008	G	A	G	A	-0.1674	0.0014	0.1745	0.9935	HP	1.13e-33	0.013841	TRUE	146.277
rs75666559	T	A	T	A	0.3137	0.0021	0.2153	0.9922	SPINK6	2.66e-58	0.019487	TRUE	259.143
rs75666559	T	A	T	A	0.3137	0.0021	0.2153	0.9922	SPINK6	2.66e-58	0.019487	TRUE	259.143
rs75666559	T	A	T	A	0.3137	0.0021	0.2153	0.9922	SPINK6	2.66e-58	0.019487	TRUE	259.143
rs75666559	T	A	T	A	0.3137	0.0021	0.2153	0.9922	SPINK6	2.66e-58	0.019487	TRUE	259.143
rs75666559	T	A	T	A	0.3137	0.0021	0.2153	0.9922	SPINK6	2.66e-58	0.019487	TRUE	259.143
rs2293788	A	G	A	G	-0.3461	0.0045	0.3527	0.9898	CCL23	7.78e-72	0.01931	TRUE	321.247
rs2293788	A	G	A	G	-0.6788	0.0045	0.3527	0.9898	CCL23	1.04e-277	0.019063	TRUE	1267.95
rs2293788	A	G	A	G	-0.3461	0.0045	0.3527	0.9898	CCL23	7.78e-72	0.01931	TRUE	321.247
rs2293788	A	G	A	G	-0.6788	0.0045	0.3527	0.9898	CCL23	1.04e-277	0.019063	TRUE	1267.95
rs2293788	A	G	A	G	-0.3461	0.0045	0.3527	0.9898	CCL23	7.78e-72	0.01931	TRUE	321.247
rs2293788	A	G	A	G	-0.6788	0.0045	0.3527	0.9898	CCL23	1.04e-277	0.019063	TRUE	1267.95
rs2293788	A	G	A	G	-0.3461	0.0045	0.3527	0.9898	CCL23	7.78e-72	0.01931	TRUE	321.247
rs2293788	A	G	A	G	-0.6788	0.0045	0.3527	0.9898	CCL23	1.04e-277	0.019063	TRUE	1267.95
rs2293788	A	G	A	G	-0.3461	0.0045	0.3527	0.9898	CCL23	7.78e-72	0.01931	TRUE	321.247
rs2293788	A	G	A	G	-0.6788	0.0045	0.3527	0.9898	CCL23	1.04e-277	0.019063	TRUE	1267.95
rs146091138	T	C	T	C	-0.2053	0.0072	0.3053	0.9812	MREG	1.24e-13	0.027698	TRUE	54.939
rs146091138	T	C	T	C	-0.2053	0.0072	0.3053	0.9812	MREG	1.24e-13	0.027698	TRUE	54.939
rs146091138	T	C	T	C	-0.2053	0.0072	0.3053	0.9812	MREG	1.24e-13	0.027698	TRUE	54.939
rs146091138	T	C	T	C	-0.2053	0.0072	0.3053	0.9812	MREG	1.24e-13	0.027698	TRUE	54.939
rs146091138	T	C	T	C	-0.2053	0.0072	0.3053	0.9812	MREG	1.24e-13	0.027698	TRUE	54.939
rs149468457	A	G	A	G	-0.1175	0.0033	0.135	0.9804	HN1	6.32e-18	0.013621	TRUE	74.4145
rs149468457	A	G	A	G	-0.1175	0.0033	0.135	0.9804	HN1	6.32e-18	0.013621	TRUE	74.4145
rs149468457	A	G	A	G	-0.1175	0.0033	0.135	0.9804	HN1	6.32e-18	0.013621	TRUE	74.4145
rs149468457	A	G	A	G	-0.1175	0.0033	0.135	0.9804	HN1	6.32e-18	0.013621	TRUE	74.4145
rs149468457	A	G	A	G	-0.1175	0.0033	0.135	0.9804	HN1	6.32e-18	0.013621	TRUE	74.4145
rs1926229	G	C	G	C	0.0556	-0.0026	0.1039	0.9804	PAWR	2.64e-08	0.009993	TRUE	30.9569
rs1926229	G	C	G	C	0.0556	-0.0026	0.1039	0.9804	PAWR	2.64e-08	0.009993	TRUE	30.9569
rs1926229	G	C	G	C	0.0556	-0.0026	0.1039	0.9804	PAWR	2.64e-08	0.009993	TRUE	30.9569
rs1926229	G	C	G	C	0.0556	-0.0026	0.1039	0.9804	PAWR	2.64e-08	0.009993	TRUE	30.9569
rs1926229	G	C	G	C	0.0556	-0.0026	0.1039	0.9804	PAWR	2.64e-08	0.009993	TRUE	30.9569
rs150649461	C	G	C	G	0.1449	-0.0067	0.2465	0.9785	LILRA5	2.45e-08	0.025981	TRUE	31.1046
rs150649461	C	G	C	G	0.1449	-0.0067	0.2465	0.9785	LILRA5	2.45e-08	0.025981	TRUE	31.1046
rs150649461	C	G	C	G	0.1449	-0.0067	0.2465	0.9785	LILRA5	2.45e-08	0.025981	TRUE	31.1046
rs150649461	C	G	C	G	0.1449	-0.0067	0.2465	0.9785	LILRA5	2.45e-08	0.025981	TRUE	31.1046
rs150649461	C	G	C	G	0.1449	-0.0067	0.2465	0.9785	LILRA5	2.45e-08	0.025981	TRUE	31.1046
rs17580	A	T	A	T	-0.1968	0.012	0.4423	0.9783	DCP1B	1.96e-19	0.02183	TRUE	81.2723
rs17580	A	T	A	T	-0.1968	0.012	0.4423	0.9783	DCP1B	1.96e-19	0.02183	TRUE	81.2723
rs17580	A	T	A	T	-0.1968	0.012	0.4423	0.9783	DCP1B	1.96e-19	0.02183	TRUE	81.2723
rs17580	A	T	A	T	-0.1968	0.012	0.4423	0.9783	DCP1B	1.96e-19	0.02183	TRUE	81.2723
rs17580	A	T	A	T	-0.1968	0.012	0.4423	0.9783	DCP1B	1.96e-19	0.02183	TRUE	81.2723
rs78372130	T	C	T	C	0.1248	-0.0235	0.7105	0.9736	HP	2e-08	0.022236	TRUE	31.5004
rs78372130	T	C	T	C	0.1248	-0.0235	0.7105	0.9736	HP	2e-08	0.022236	TRUE	31.5004
rs78372130	T	C	T	C	0.1248	-0.0235	0.7105	0.9736	HP	2e-08	0.022236	TRUE	31.5004
rs78372130	T	C	T	C	0.1248	-0.0235	0.7105	0.9736	HP	2e-08	0.022236	TRUE	31.5004
rs78372130	T	C	T	C	0.1248	-0.0235	0.7105	0.9736	HP	2e-08	0.022236	TRUE	31.5004
rs2736191	G	C	G	C	-0.5987	-0.0083	0.1839	0.9642	MICA	1.14e-301	0.016127	TRUE	1378.2
rs2736191	G	C	G	C	-0.5987	-0.0083	0.1839	0.9642	MICA	1.14e-301	0.016127	TRUE	1378.2
rs2736191	G	C	G	C	-0.5987	-0.0083	0.1839	0.9642	MICA	1.14e-301	0.016127	TRUE	1378.2
rs2736191	G	C	G	C	-0.5987	-0.0083	0.1839	0.9642	MICA	1.14e-301	0.016127	TRUE	1378.2
rs2736191	G	C	G	C	-0.5987	-0.0083	0.1839	0.9642	MICA	1.14e-301	0.016127	TRUE	1378.2
rs146244846	A	G	A	G	-0.1439	0.019	0.4149	0.9635	C1QTNF5	1.65e-10	0.022518	TRUE	40.8378
rs146244846	A	G	A	G	-0.1439	0.019	0.4149	0.9635	C1QTNF5	1.65e-10	0.022518	TRUE	40.8378
rs146244846	A	G	A	G	-0.1439	0.019	0.4149	0.9635	C1QTNF5	1.65e-10	0.022518	TRUE	40.8378
rs146244846	A	G	A	G	-0.1439	0.019	0.4149	0.9635	C1QTNF5	1.65e-10	0.022518	TRUE	40.8378
rs146244846	A	G	A	G	-0.1439	0.019	0.4149	0.9635	C1QTNF5	1.65e-10	0.022518	TRUE	40.8378
rs6870546	T	C	T	C	0.1304	0.0103	0.2231	0.9631	HSPG2	1.75e-09	0.021663	TRUE	36.2341
rs6870546	T	C	T	C	0.1304	0.0103	0.2231	0.9631	HSPG2	1.75e-09	0.021663	TRUE	36.2341
rs6870546	T	C	T	C	0.1304	0.0103	0.2231	0.9631	HSPG2	1.75e-09	0.021663	TRUE	36.2341
rs6870546	T	C	T	C	0.1304	0.0103	0.2231	0.9631	HSPG2	1.75e-09	0.021663	TRUE	36.2341
rs6870546	T	C	T	C	0.1304	0.0103	0.2231	0.9631	HSPG2	1.75e-09	0.021663	TRUE	36.2341
rs7310615	G	C	G	C	-0.0535	-0.0043	0.0826	0.9583	LILRA5	1.16e-09	0.00879	TRUE	37.045
rs7310615	G	C	G	C	-0.0535	-0.0043	0.0826	0.9583	LILRA5	1.16e-09	0.00879	TRUE	37.045
rs7310615	G	C	G	C	-0.0535	-0.0043	0.0826	0.9583	LILRA5	1.16e-09	0.00879	TRUE	37.045
rs7310615	G	C	G	C	-0.0535	-0.0043	0.0826	0.9583	LILRA5	1.16e-09	0.00879	TRUE	37.045
rs7310615	G	C	G	C	-0.0535	-0.0043	0.0826	0.9583	LILRA5	1.16e-09	0.00879	TRUE	37.045
rs12103521	G	A	G	A	0.0475	0.0051	0.0928	0.9561	HN1	1.29e-08	0.008351	TRUE	32.3527
rs12103521	G	A	G	A	0.0475	0.0051	0.0928	0.9561	HN1	1.29e-08	0.008351	TRUE	32.3527
rs12103521	G	A	G	A	0.0475	0.0051	0.0928	0.9561	HN1	1.29e-08	0.008351	TRUE	32.3527
rs12103521	G	A	G	A	0.0475	0.0051	0.0928	0.9561	HN1	1.29e-08	0.008351	TRUE	32.3527
rs12103521	G	A	G	A	0.0475	0.0051	0.0928	0.9561	HN1	1.29e-08	0.008351	TRUE	32.3527
rs9910539	A	G	A	G	-0.0578	-0.0045	0.082	0.9559	NCAN	2.02e-11	0.008621	TRUE	44.9511
rs9910539	A	G	A	G	-0.0578	-0.0045	0.082	0.9559	NCAN	2.02e-11	0.008621	TRUE	44.9511
rs9910539	A	G	A	G	-0.0578	-0.0045	0.082	0.9559	NCAN	2.02e-11	0.008621	TRUE	44.9511
rs9910539	A	G	A	G	-0.0578	-0.0045	0.082	0.9559	NCAN	2.02e-11	0.008621	TRUE	44.9511
rs9910539	A	G	A	G	-0.0578	-0.0045	0.082	0.9559	NCAN	2.02e-11	0.008621	TRUE	44.9511
rs73243140	C	A	C	A	0.1205	0.0292	0.492	0.9526	SRXN1	4.55e-08	0.022037	TRUE	29.8999
rs73243140	C	A	C	A	0.1205	0.0292	0.492	0.9526	SRXN1	4.55e-08	0.022037	TRUE	29.8999
rs73243140	C	A	C	A	0.1205	0.0292	0.492	0.9526	SRXN1	4.55e-08	0.022037	TRUE	29.8999
rs73243140	C	A	C	A	0.1205	0.0292	0.492	0.9526	SRXN1	4.55e-08	0.022037	TRUE	29.8999
rs73243140	C	A	C	A	0.1205	0.0292	0.492	0.9526	SRXN1	4.55e-08	0.022037	TRUE	29.8999
rs114341989	T	C	T	C	0.2405	-0.0207	0.297	0.9445	FKBP1B	1.16e-08	0.042156	TRUE	32.547
rs114341989	T	C	T	C	0.2405	-0.0207	0.297	0.9445	FKBP1B	1.16e-08	0.042156	TRUE	32.547
rs114341989	T	C	T	C	0.2405	-0.0207	0.297	0.9445	FKBP1B	1.16e-08	0.042156	TRUE	32.547
rs114341989	T	C	T	C	0.2405	-0.0207	0.297	0.9445	FKBP1B	1.16e-08	0.042156	TRUE	32.547
rs114341989	T	C	T	C	0.2405	-0.0207	0.297	0.9445	FKBP1B	1.16e-08	0.042156	TRUE	32.547
rs117310449	T	C	T	C	-0.6041	0.0253	0.3627	0.9444	PHGDH	1.13e-60	0.036764	TRUE	270.005
rs117310449	T	C	T	C	-0.6041	0.0253	0.3627	0.9444	PHGDH	1.13e-60	0.036764	TRUE	270.005
rs117310449	T	C	T	C	-0.6041	0.0253	0.3627	0.9444	PHGDH	1.13e-60	0.036764	TRUE	270.005
rs117310449	T	C	T	C	-0.6041	0.0253	0.3627	0.9444	PHGDH	1.13e-60	0.036764	TRUE	270.005
rs117310449	T	C	T	C	-0.6041	0.0253	0.3627	0.9444	PHGDH	1.13e-60	0.036764	TRUE	270.005
rs2237085	A	G	A	G	-0.0598	0.0088	0.118	0.9403	LILRA5	7.02e-09	0.010327	TRUE	33.5316
rs2237085	A	G	A	G	-0.0598	0.0088	0.118	0.9403	LILRA5	7.02e-09	0.010327	TRUE	33.5316
rs2237085	A	G	A	G	-0.0598	0.0088	0.118	0.9403	LILRA5	7.02e-09	0.010327	TRUE	33.5316
rs2237085	A	G	A	G	-0.0598	0.0088	0.118	0.9403	LILRA5	7.02e-09	0.010327	TRUE	33.5316
rs2237085	A	G	A	G	-0.0598	0.0088	0.118	0.9403	LILRA5	7.02e-09	0.010327	TRUE	33.5316
rs118108777	T	C	T	C	0.1774	0.0328	0.4196	0.9377	MMP1	1.07e-12	0.024909	TRUE	50.7218
rs118108777	T	C	T	C	0.1774	0.0328	0.4196	0.9377	MMP1	1.07e-12	0.024909	TRUE	50.7218
rs118108777	T	C	T	C	0.1774	0.0328	0.4196	0.9377	MMP1	1.07e-12	0.024909	TRUE	50.7218
rs118108777	T	C	T	C	0.1774	0.0328	0.4196	0.9377	MMP1	1.07e-12	0.024909	TRUE	50.7218
rs118108777	T	C	T	C	0.1774	0.0328	0.4196	0.9377	MMP1	1.07e-12	0.024909	TRUE	50.7218
rs78005543	G	T	G	T	-0.2273	-0.0225	0.2864	0.9373	MICA	1.03e-08	0.039699	TRUE	32.7823
rs78005543	G	T	G	T	-0.2273	-0.0225	0.2864	0.9373	MICA	1.03e-08	0.039699	TRUE	32.7823
rs78005543	G	T	G	T	-0.2273	-0.0225	0.2864	0.9373	MICA	1.03e-08	0.039699	TRUE	32.7823
rs78005543	G	T	G	T	-0.2273	-0.0225	0.2864	0.9373	MICA	1.03e-08	0.039699	TRUE	32.7823
rs78005543	G	T	G	T	-0.2273	-0.0225	0.2864	0.9373	MICA	1.03e-08	0.039699	TRUE	32.7823
rs138140925	G	A	G	A	0.2618	-0.0796	1.0012	0.9366	MYOC	4.59e-18	0.03022	TRUE	75.0499
rs138140925	G	A	G	A	0.2618	-0.0796	1.0012	0.9366	MYOC	4.59e-18	0.03022	TRUE	75.0499
rs138140925	G	A	G	A	0.2618	-0.0796	1.0012	0.9366	MYOC	4.59e-18	0.03022	TRUE	75.0499
rs138140925	G	A	G	A	0.2618	-0.0796	1.0012	0.9366	MYOC	4.59e-18	0.03022	TRUE	75.0499
rs138140925	G	A	G	A	0.2618	-0.0796	1.0012	0.9366	MYOC	4.59e-18	0.03022	TRUE	75.0499
rs1160610	A	C	A	C	-0.0556	0.0069	0.0814	0.9326	NPFF	8.97e-12	0.00815	TRUE	46.5409
rs1160610	A	C	A	C	-0.0556	0.0069	0.0814	0.9326	NPFF	8.97e-12	0.00815	TRUE	46.5409
rs1160610	A	C	A	C	-0.0556	0.0069	0.0814	0.9326	NPFF	8.97e-12	0.00815	TRUE	46.5409
rs1160610	A	C	A	C	-0.0556	0.0069	0.0814	0.9326	NPFF	8.97e-12	0.00815	TRUE	46.5409
rs1160610	A	C	A	C	-0.0556	0.0069	0.0814	0.9326	NPFF	8.97e-12	0.00815	TRUE	46.5409
rs780093	C	T	C	T	-0.0578	0.0084	0.0853	0.9213	APOM	2.31e-11	0.008647	TRUE	44.6812
rs780093	C	T	C	T	-0.0578	0.0084	0.0853	0.9213	APOM	2.31e-11	0.008647	TRUE	44.6812
rs780093	C	T	C	T	-0.0578	0.0084	0.0853	0.9213	APOM	2.31e-11	0.008647	TRUE	44.6812
rs780093	C	T	C	T	-0.0578	0.0084	0.0853	0.9213	APOM	2.31e-11	0.008647	TRUE	44.6812
rs780093	C	T	C	T	-0.0578	0.0084	0.0853	0.9213	APOM	2.31e-11	0.008647	TRUE	44.6812
rs1449263	T	C	T	C	0.0514	-0.0085	0.0826	0.9184	LILRA5	1.61e-09	0.00852	TRUE	36.3954
rs1449263	T	C	T	C	0.0514	-0.0085	0.0826	0.9184	LILRA5	1.61e-09	0.00852	TRUE	36.3954
rs1449263	T	C	T	C	0.0514	-0.0085	0.0826	0.9184	LILRA5	1.61e-09	0.00852	TRUE	36.3954
rs1449263	T	C	T	C	0.0514	-0.0085	0.0826	0.9184	LILRA5	1.61e-09	0.00852	TRUE	36.3954
rs1449263	T	C	T	C	0.0514	-0.0085	0.0826	0.9184	LILRA5	1.61e-09	0.00852	TRUE	36.3954
rs41272078	T	C	T	C	0.2874	0.0247	0.2397	0.918	TDO2	8.84e-25	0.027962	TRUE	105.642
rs41272078	T	C	T	C	0.2874	0.0247	0.2397	0.918	TDO2	8.84e-25	0.027962	TRUE	105.642
rs41272078	T	C	T	C	0.2874	0.0247	0.2397	0.918	TDO2	8.84e-25	0.027962	TRUE	105.642
rs41272078	T	C	T	C	0.2874	0.0247	0.2397	0.918	TDO2	8.84e-25	0.027962	TRUE	105.642
rs41272078	T	C	T	C	0.2874	0.0247	0.2397	0.918	TDO2	8.84e-25	0.027962	TRUE	105.642
rs1329424	G	T	G	T	-0.0454	0.0085	0.0821	0.9178	ERMAP	1.79e-08	0.008062	TRUE	31.7122
rs1329424	G	T	G	T	-0.0454	0.0085	0.0821	0.9178	ERMAP	1.79e-08	0.008062	TRUE	31.7122
rs1329424	G	T	G	T	-0.0454	0.0085	0.0821	0.9178	ERMAP	1.79e-08	0.008062	TRUE	31.7122
rs1329424	G	T	G	T	-0.0454	0.0085	0.0821	0.9178	ERMAP	1.79e-08	0.008062	TRUE	31.7122
rs1329424	G	T	G	T	-0.0454	0.0085	0.0821	0.9178	ERMAP	1.79e-08	0.008062	TRUE	31.7122
rs1329424	G	T	G	T	-0.0675	0.0085	0.0821	0.9178	NHLRC3	9.98e-17	0.008128	TRUE	68.9668
rs1329424	G	T	G	T	-0.0675	0.0085	0.0821	0.9178	NHLRC3	9.98e-17	0.008128	TRUE	68.9668
rs1329424	G	T	G	T	-0.0675	0.0085	0.0821	0.9178	NHLRC3	9.98e-17	0.008128	TRUE	68.9668
rs1329424	G	T	G	T	-0.0675	0.0085	0.0821	0.9178	NHLRC3	9.98e-17	0.008128	TRUE	68.9668
rs1329424	G	T	G	T	-0.0675	0.0085	0.0821	0.9178	NHLRC3	9.98e-17	0.008128	TRUE	68.9668
rs28396306	A	G	A	G	-0.0542	0.0088	0.0844	0.9172	ADGRE2	1.83e-08	0.009632	TRUE	31.664
rs28396306	A	G	A	G	-0.0542	0.0088	0.0844	0.9172	ADGRE2	1.83e-08	0.009632	TRUE	31.664
rs28396306	A	G	A	G	-0.0542	0.0088	0.0844	0.9172	ADGRE2	1.83e-08	0.009632	TRUE	31.664
rs28396306	A	G	A	G	-0.0542	0.0088	0.0844	0.9172	ADGRE2	1.83e-08	0.009632	TRUE	31.664
rs28396306	A	G	A	G	-0.0542	0.0088	0.0844	0.9172	ADGRE2	1.83e-08	0.009632	TRUE	31.664
rs2227319	A	G	A	G	-0.0486	0.0093	0.0865	0.9144	LILRA5	3.25e-08	0.008792	TRUE	30.556
rs2227319	A	G	A	G	-0.0486	0.0093	0.0865	0.9144	LILRA5	3.25e-08	0.008792	TRUE	30.556
rs2227319	A	G	A	G	-0.0486	0.0093	0.0865	0.9144	LILRA5	3.25e-08	0.008792	TRUE	30.556
rs2227319	A	G	A	G	-0.0486	0.0093	0.0865	0.9144	LILRA5	3.25e-08	0.008792	TRUE	30.556
rs2227319	A	G	A	G	-0.0486	0.0093	0.0865	0.9144	LILRA5	3.25e-08	0.008792	TRUE	30.556
rs4581767	A	G	A	G	-0.0626	0.0141	0.126	0.9111	BMP6	1.11e-10	0.009703	TRUE	41.6233
rs4581767	A	G	A	G	-0.0626	0.0141	0.126	0.9111	BMP6	1.11e-10	0.009703	TRUE	41.6233
rs4581767	A	G	A	G	-0.0626	0.0141	0.126	0.9111	BMP6	1.11e-10	0.009703	TRUE	41.6233
rs4581767	A	G	A	G	-0.0626	0.0141	0.126	0.9111	BMP6	1.11e-10	0.009703	TRUE	41.6233
rs4581767	A	G	A	G	-0.0626	0.0141	0.126	0.9111	BMP6	1.11e-10	0.009703	TRUE	41.6233
rs10922098	T	C	T	C	-0.0682	0.0092	0.0821	0.9106	CALCB	2.73e-17	0.008064	TRUE	71.5266
rs10922098	T	C	T	C	-0.0682	0.0092	0.0821	0.9106	CALCB	2.73e-17	0.008064	TRUE	71.5266
rs10922098	T	C	T	C	-0.0682	0.0092	0.0821	0.9106	CALCB	2.73e-17	0.008064	TRUE	71.5266
rs10922098	T	C	T	C	-0.0682	0.0092	0.0821	0.9106	CALCB	2.73e-17	0.008064	TRUE	71.5266
rs10922098	T	C	T	C	-0.0682	0.0092	0.0821	0.9106	CALCB	2.73e-17	0.008064	TRUE	71.5266
rs10922098	T	C	T	C	-0.0577	0.0092	0.0821	0.9106	GFRAL	1.62e-12	0.008168	TRUE	49.9023
rs10922098	T	C	T	C	-0.0577	0.0092	0.0821	0.9106	GFRAL	1.62e-12	0.008168	TRUE	49.9023
rs10922098	T	C	T	C	-0.0577	0.0092	0.0821	0.9106	GFRAL	1.62e-12	0.008168	TRUE	49.9023
rs10922098	T	C	T	C	-0.0577	0.0092	0.0821	0.9106	GFRAL	1.62e-12	0.008168	TRUE	49.9023
rs10922098	T	C	T	C	-0.0577	0.0092	0.0821	0.9106	GFRAL	1.62e-12	0.008168	TRUE	49.9023
rs10922098	T	C	T	C	-0.0523	0.0092	0.0821	0.9106	ING4	1.65e-09	0.008675	TRUE	36.3467
rs10922098	T	C	T	C	-0.0523	0.0092	0.0821	0.9106	ING4	1.65e-09	0.008675	TRUE	36.3467
rs10922098	T	C	T	C	-0.0523	0.0092	0.0821	0.9106	ING4	1.65e-09	0.008675	TRUE	36.3467
rs10922098	T	C	T	C	-0.0523	0.0092	0.0821	0.9106	ING4	1.65e-09	0.008675	TRUE	36.3467
rs10922098	T	C	T	C	-0.0523	0.0092	0.0821	0.9106	ING4	1.65e-09	0.008675	TRUE	36.3467
rs10922098	T	C	T	C	-0.0912	0.0092	0.0821	0.9106	PSMB9	1.8e-29	0.008091	TRUE	127.053
rs10922098	T	C	T	C	-0.0912	0.0092	0.0821	0.9106	PSMB9	1.8e-29	0.008091	TRUE	127.053
rs10922098	T	C	T	C	-0.0912	0.0092	0.0821	0.9106	PSMB9	1.8e-29	0.008091	TRUE	127.053
rs10922098	T	C	T	C	-0.0912	0.0092	0.0821	0.9106	PSMB9	1.8e-29	0.008091	TRUE	127.053
rs10922098	T	C	T	C	-0.0912	0.0092	0.0821	0.9106	PSMB9	1.8e-29	0.008091	TRUE	127.053
rs10922098	T	C	T	C	-0.0815	0.0092	0.0821	0.9106	TMPRSS11D	5.1e-24	0.008063	TRUE	102.17
rs10922098	T	C	T	C	-0.0815	0.0092	0.0821	0.9106	TMPRSS11D	5.1e-24	0.008063	TRUE	102.17
rs10922098	T	C	T	C	-0.0815	0.0092	0.0821	0.9106	TMPRSS11D	5.1e-24	0.008063	TRUE	102.17
rs10922098	T	C	T	C	-0.0815	0.0092	0.0821	0.9106	TMPRSS11D	5.1e-24	0.008063	TRUE	102.17
rs10922098	T	C	T	C	-0.0815	0.0092	0.0821	0.9106	TMPRSS11D	5.1e-24	0.008063	TRUE	102.17
rs10922098	T	C	T	C	-0.0709	0.0092	0.0821	0.9106	VPS29	1.01e-15	0.008834	TRUE	64.4136
rs10922098	T	C	T	C	-0.0709	0.0092	0.0821	0.9106	VPS29	1.01e-15	0.008834	TRUE	64.4136
rs10922098	T	C	T	C	-0.0709	0.0092	0.0821	0.9106	VPS29	1.01e-15	0.008834	TRUE	64.4136
rs10922098	T	C	T	C	-0.0709	0.0092	0.0821	0.9106	VPS29	1.01e-15	0.008834	TRUE	64.4136
rs10922098	T	C	T	C	-0.0709	0.0092	0.0821	0.9106	VPS29	1.01e-15	0.008834	TRUE	64.4136
rs149857247	T	C	T	C	0.3339	-0.0305	0.2598	0.9066	LRRN1	5.24e-19	0.037487	TRUE	79.3362
rs149857247	T	C	T	C	0.3339	-0.0305	0.2598	0.9066	LRRN1	5.24e-19	0.037487	TRUE	79.3362
rs149857247	T	C	T	C	0.3339	-0.0305	0.2598	0.9066	LRRN1	5.24e-19	0.037487	TRUE	79.3362
rs149857247	T	C	T	C	0.3339	-0.0305	0.2598	0.9066	LRRN1	5.24e-19	0.037487	TRUE	79.3362
rs149857247	T	C	T	C	0.3339	-0.0305	0.2598	0.9066	LRRN1	5.24e-19	0.037487	TRUE	79.3362
rs1139490	T	C	T	C	-0.0535	0.0108	0.0885	0.9027	LGALS3BP	4.94e-09	0.009146	TRUE	34.2173
rs1139490	T	C	T	C	-0.0535	0.0108	0.0885	0.9027	LGALS3BP	4.94e-09	0.009146	TRUE	34.2173
rs1139490	T	C	T	C	-0.0535	0.0108	0.0885	0.9027	LGALS3BP	4.94e-09	0.009146	TRUE	34.2173
rs1139490	T	C	T	C	-0.0535	0.0108	0.0885	0.9027	LGALS3BP	4.94e-09	0.009146	TRUE	34.2173
rs1139490	T	C	T	C	-0.0535	0.0108	0.0885	0.9027	LGALS3BP	4.94e-09	0.009146	TRUE	34.2173
rs72697127	G	A	G	A	0.3402	0.0528	0.4195	0.8999	GSTM3	6.09e-50	0.022895	TRUE	220.794
rs72697127	G	A	G	A	0.3402	0.0528	0.4195	0.8999	GSTM3	6.09e-50	0.022895	TRUE	220.794
rs72697127	G	A	G	A	0.3402	0.0528	0.4195	0.8999	GSTM3	6.09e-50	0.022895	TRUE	220.794
rs72697127	G	A	G	A	0.3402	0.0528	0.4195	0.8999	GSTM3	6.09e-50	0.022895	TRUE	220.794
rs72697127	G	A	G	A	0.3402	0.0528	0.4195	0.8999	GSTM3	6.09e-50	0.022895	TRUE	220.794
rs144654395	A	G	A	G	0.2878	-0.0341	0.2429	0.8883	HSPG2	3.01e-13	0.039458	TRUE	53.2
rs144654395	A	G	A	G	0.2878	-0.0341	0.2429	0.8883	HSPG2	3.01e-13	0.039458	TRUE	53.2
rs144654395	A	G	A	G	0.2878	-0.0341	0.2429	0.8883	HSPG2	3.01e-13	0.039458	TRUE	53.2
rs144654395	A	G	A	G	0.2878	-0.0341	0.2429	0.8883	HSPG2	3.01e-13	0.039458	TRUE	53.2
rs144654395	A	G	A	G	0.2878	-0.0341	0.2429	0.8883	HSPG2	3.01e-13	0.039458	TRUE	53.2
rs78665534	T	C	T	C	0.1908	0.067	0.4331	0.8771	GSTM3	6.58e-12	0.027787	TRUE	47.1491
rs78665534	T	C	T	C	0.1908	0.067	0.4331	0.8771	GSTM3	6.58e-12	0.027787	TRUE	47.1491
rs78665534	T	C	T	C	0.1908	0.067	0.4331	0.8771	GSTM3	6.58e-12	0.027787	TRUE	47.1491
rs78665534	T	C	T	C	0.1908	0.067	0.4331	0.8771	GSTM3	6.58e-12	0.027787	TRUE	47.1491
rs78665534	T	C	T	C	0.1908	0.067	0.4331	0.8771	GSTM3	6.58e-12	0.027787	TRUE	47.1491
rs60653700	T	C	T	C	0.5795	-0.105	0.6768	0.8768	LGALS3BP	2.61e-67	0.033431	TRUE	300.475
rs60653700	T	C	T	C	0.5795	-0.105	0.6768	0.8768	LGALS3BP	2.61e-67	0.033431	TRUE	300.475
rs60653700	T	C	T	C	0.5795	-0.105	0.6768	0.8768	LGALS3BP	2.61e-67	0.033431	TRUE	300.475
rs60653700	T	C	T	C	0.5795	-0.105	0.6768	0.8768	LGALS3BP	2.61e-67	0.033431	TRUE	300.475
rs60653700	T	C	T	C	0.5795	-0.105	0.6768	0.8768	LGALS3BP	2.61e-67	0.033431	TRUE	300.475
rs1260326	C	T	C	T	-0.0727	0.0139	0.0856	0.8708	C5orf38	9.78e-16	0.009054	TRUE	64.4745
rs1260326	C	T	C	T	-0.0727	0.0139	0.0856	0.8708	C5orf38	9.78e-16	0.009054	TRUE	64.4745
rs1260326	C	T	C	T	-0.0727	0.0139	0.0856	0.8708	C5orf38	9.78e-16	0.009054	TRUE	64.4745
rs1260326	C	T	C	T	-0.0727	0.0139	0.0856	0.8708	C5orf38	9.78e-16	0.009054	TRUE	64.4745
rs1260326	C	T	C	T	-0.0727	0.0139	0.0856	0.8708	C5orf38	9.78e-16	0.009054	TRUE	64.4745
rs1260326	C	T	C	T	0.0553	0.0139	0.0856	0.8708	CACNA2D3	1.75e-10	0.008665	TRUE	40.7299
rs1260326	C	T	C	T	0.0553	0.0139	0.0856	0.8708	CACNA2D3	1.75e-10	0.008665	TRUE	40.7299
rs1260326	C	T	C	T	0.0553	0.0139	0.0856	0.8708	CACNA2D3	1.75e-10	0.008665	TRUE	40.7299
rs1260326	C	T	C	T	0.0553	0.0139	0.0856	0.8708	CACNA2D3	1.75e-10	0.008665	TRUE	40.7299
rs1260326	C	T	C	T	0.0553	0.0139	0.0856	0.8708	CACNA2D3	1.75e-10	0.008665	TRUE	40.7299
rs1260326	C	T	C	T	-0.0526	0.0139	0.0856	0.8708	HP	9.13e-12	0.007713	TRUE	46.5077
rs1260326	C	T	C	T	-0.0526	0.0139	0.0856	0.8708	HP	9.13e-12	0.007713	TRUE	46.5077
rs1260326	C	T	C	T	-0.0526	0.0139	0.0856	0.8708	HP	9.13e-12	0.007713	TRUE	46.5077
rs1260326	C	T	C	T	-0.0526	0.0139	0.0856	0.8708	HP	9.13e-12	0.007713	TRUE	46.5077
rs1260326	C	T	C	T	-0.0526	0.0139	0.0856	0.8708	HP	9.13e-12	0.007713	TRUE	46.5077
rs4788808	T	C	T	C	-0.3128	-0.0137	0.0825	0.8686	HP	0	0.005491	TRUE	3245.12
rs4788808	T	C	T	C	-0.3128	-0.0137	0.0825	0.8686	HP	0	0.005491	TRUE	3245.12
rs4788808	T	C	T	C	-0.3128	-0.0137	0.0825	0.8686	HP	0	0.005491	TRUE	3245.12
rs4788808	T	C	T	C	-0.3128	-0.0137	0.0825	0.8686	HP	0	0.005491	TRUE	3245.12
rs4788808	T	C	T	C	-0.3128	-0.0137	0.0825	0.8686	HP	0	0.005491	TRUE	3245.12
rs11925835	C	T	C	T	0.0493	-0.015	0.0873	0.8637	ARAF	7.31e-10	0.008004	TRUE	37.9385
rs11925835	C	T	C	T	0.0493	-0.015	0.0873	0.8637	ARAF	7.31e-10	0.008004	TRUE	37.9385
rs11925835	C	T	C	T	0.0493	-0.015	0.0873	0.8637	ARAF	7.31e-10	0.008004	TRUE	37.9385
rs11925835	C	T	C	T	0.0493	-0.015	0.0873	0.8637	ARAF	7.31e-10	0.008004	TRUE	37.9385
rs11925835	C	T	C	T	0.0493	-0.015	0.0873	0.8637	ARAF	7.31e-10	0.008004	TRUE	37.9385
rs11925835	C	T	C	T	0.047	-0.015	0.0873	0.8637	DLX4	1.07e-08	0.008219	TRUE	32.7008
rs11925835	C	T	C	T	0.047	-0.015	0.0873	0.8637	DLX4	1.07e-08	0.008219	TRUE	32.7008
rs11925835	C	T	C	T	0.047	-0.015	0.0873	0.8637	DLX4	1.07e-08	0.008219	TRUE	32.7008
rs11925835	C	T	C	T	0.047	-0.015	0.0873	0.8637	DLX4	1.07e-08	0.008219	TRUE	32.7008
rs11925835	C	T	C	T	0.047	-0.015	0.0873	0.8637	DLX4	1.07e-08	0.008219	TRUE	32.7008
rs11925835	C	T	C	T	0.0508	-0.015	0.0873	0.8637	FKBP1B	6.17e-10	0.008212	TRUE	38.2675
rs11925835	C	T	C	T	0.0508	-0.015	0.0873	0.8637	FKBP1B	6.17e-10	0.008212	TRUE	38.2675
rs11925835	C	T	C	T	0.0508	-0.015	0.0873	0.8637	FKBP1B	6.17e-10	0.008212	TRUE	38.2675
rs11925835	C	T	C	T	0.0508	-0.015	0.0873	0.8637	FKBP1B	6.17e-10	0.008212	TRUE	38.2675
rs11925835	C	T	C	T	0.0508	-0.015	0.0873	0.8637	FKBP1B	6.17e-10	0.008212	TRUE	38.2675
rs17817497	C	T	C	T	-0.0508	0.0145	0.083	0.861	NCAN	4.01e-09	0.008634	TRUE	34.6181
rs17817497	C	T	C	T	-0.0508	0.0145	0.083	0.861	NCAN	4.01e-09	0.008634	TRUE	34.6181
rs17817497	C	T	C	T	-0.0508	0.0145	0.083	0.861	NCAN	4.01e-09	0.008634	TRUE	34.6181
rs17817497	C	T	C	T	-0.0508	0.0145	0.083	0.861	NCAN	4.01e-09	0.008634	TRUE	34.6181
rs17817497	C	T	C	T	-0.0508	0.0145	0.083	0.861	NCAN	4.01e-09	0.008634	TRUE	34.6181
rs115775278	C	T	C	T	0.7297	0.086	0.4718	0.8554	HP	3.45e-126	0.030538	TRUE	570.962
rs115775278	C	T	C	T	0.7297	0.086	0.4718	0.8554	HP	3.45e-126	0.030538	TRUE	570.962
rs115775278	C	T	C	T	0.7297	0.086	0.4718	0.8554	HP	3.45e-126	0.030538	TRUE	570.962
rs115775278	C	T	C	T	0.7297	0.086	0.4718	0.8554	HP	3.45e-126	0.030538	TRUE	570.962
rs115775278	C	T	C	T	0.7297	0.086	0.4718	0.8554	HP	3.45e-126	0.030538	TRUE	570.962
rs142126988	G	A	G	A	0.1581	0.0619	0.3367	0.8542	SPINK6	2.23e-08	0.028265	TRUE	31.2871
rs142126988	G	A	G	A	0.1581	0.0619	0.3367	0.8542	SPINK6	2.23e-08	0.028265	TRUE	31.2871
rs142126988	G	A	G	A	0.1581	0.0619	0.3367	0.8542	SPINK6	2.23e-08	0.028265	TRUE	31.2871
rs142126988	G	A	G	A	0.1581	0.0619	0.3367	0.8542	SPINK6	2.23e-08	0.028265	TRUE	31.2871
rs142126988	G	A	G	A	0.1581	0.0619	0.3367	0.8542	SPINK6	2.23e-08	0.028265	TRUE	31.2871
rs1423993	G	A	G	A	-0.1322	0.0522	0.2723	0.848	HP	6.48e-10	0.021397	TRUE	38.1731
rs1423993	G	A	G	A	-0.1322	0.0522	0.2723	0.848	HP	6.48e-10	0.021397	TRUE	38.1731
rs1423993	G	A	G	A	-0.1322	0.0522	0.2723	0.848	HP	6.48e-10	0.021397	TRUE	38.1731
rs1423993	G	A	G	A	-0.1322	0.0522	0.2723	0.848	HP	6.48e-10	0.021397	TRUE	38.1731
rs1423993	G	A	G	A	-0.1322	0.0522	0.2723	0.848	HP	6.48e-10	0.021397	TRUE	38.1731
rs183911838	C	A	C	A	0.4359	0.1493	0.7663	0.8455	PTGR1	5.31e-24	0.043142	TRUE	102.088
rs183911838	C	A	C	A	0.4359	0.1493	0.7663	0.8455	PTGR1	5.31e-24	0.043142	TRUE	102.088
rs183911838	C	A	C	A	0.4359	0.1493	0.7663	0.8455	PTGR1	5.31e-24	0.043142	TRUE	102.088
rs183911838	C	A	C	A	0.4359	0.1493	0.7663	0.8455	PTGR1	5.31e-24	0.043142	TRUE	102.088
rs183911838	C	A	C	A	0.4359	0.1493	0.7663	0.8455	PTGR1	5.31e-24	0.043142	TRUE	102.088
rs57146646	G	A	G	A	0.359	0.0382	0.1941	0.8442	HP	1.14e-77	0.019244	TRUE	348.015
rs57146646	G	A	G	A	0.359	0.0382	0.1941	0.8442	HP	1.14e-77	0.019244	TRUE	348.015
rs57146646	G	A	G	A	0.359	0.0382	0.1941	0.8442	HP	1.14e-77	0.019244	TRUE	348.015
rs57146646	G	A	G	A	0.359	0.0382	0.1941	0.8442	HP	1.14e-77	0.019244	TRUE	348.015
rs57146646	G	A	G	A	0.359	0.0382	0.1941	0.8442	HP	1.14e-77	0.019244	TRUE	348.015
rs147660324	A	G	A	G	-0.1524	-0.0555	0.2699	0.837	CACNA2D3	1.28e-11	0.022507	TRUE	45.8495
rs147660324	A	G	A	G	-0.1524	-0.0555	0.2699	0.837	CACNA2D3	1.28e-11	0.022507	TRUE	45.8495
rs147660324	A	G	A	G	-0.1524	-0.0555	0.2699	0.837	CACNA2D3	1.28e-11	0.022507	TRUE	45.8495
rs147660324	A	G	A	G	-0.1524	-0.0555	0.2699	0.837	CACNA2D3	1.28e-11	0.022507	TRUE	45.8495
rs147660324	A	G	A	G	-0.1524	-0.0555	0.2699	0.837	CACNA2D3	1.28e-11	0.022507	TRUE	45.8495
rs76899221	A	G	A	G	-0.1575	0.044	0.2079	0.8325	PSMB4	3.06e-17	0.018651	TRUE	71.3111
rs76899221	A	G	A	G	-0.1575	0.044	0.2079	0.8325	PSMB4	3.06e-17	0.018651	TRUE	71.3111
rs76899221	A	G	A	G	-0.1575	0.044	0.2079	0.8325	PSMB4	3.06e-17	0.018651	TRUE	71.3111
rs76899221	A	G	A	G	-0.1575	0.044	0.2079	0.8325	PSMB4	3.06e-17	0.018651	TRUE	71.3111
rs76899221	A	G	A	G	-0.1575	0.044	0.2079	0.8325	PSMB4	3.06e-17	0.018651	TRUE	71.3111
rs4764822	T	C	T	C	-0.062	0.0201	0.0907	0.8247	GNPTG	1.32e-11	0.009163	TRUE	45.7834
rs4764822	T	C	T	C	-0.062	0.0201	0.0907	0.8247	GNPTG	1.32e-11	0.009163	TRUE	45.7834
rs4764822	T	C	T	C	-0.062	0.0201	0.0907	0.8247	GNPTG	1.32e-11	0.009163	TRUE	45.7834
rs4764822	T	C	T	C	-0.062	0.0201	0.0907	0.8247	GNPTG	1.32e-11	0.009163	TRUE	45.7834
rs4764822	T	C	T	C	-0.062	0.0201	0.0907	0.8247	GNPTG	1.32e-11	0.009163	TRUE	45.7834
rs6503063	C	T	C	T	-0.0788	-0.0201	0.0904	0.8239	SERPINF1	1.01e-18	0.00892	TRUE	78.041
rs6503063	C	T	C	T	-0.0788	-0.0201	0.0904	0.8239	SERPINF1	1.01e-18	0.00892	TRUE	78.041
rs6503063	C	T	C	T	-0.0788	-0.0201	0.0904	0.8239	SERPINF1	1.01e-18	0.00892	TRUE	78.041
rs6503063	C	T	C	T	-0.0788	-0.0201	0.0904	0.8239	SERPINF1	1.01e-18	0.00892	TRUE	78.041
rs6503063	C	T	C	T	-0.0788	-0.0201	0.0904	0.8239	SERPINF1	1.01e-18	0.00892	TRUE	78.041
rs132631	C	A	C	A	0.0661	-0.0278	0.1228	0.8211	POMGNT2	3.42e-10	0.010528	TRUE	39.4195
rs132631	C	A	C	A	0.0661	-0.0278	0.1228	0.8211	POMGNT2	3.42e-10	0.010528	TRUE	39.4195
rs132631	C	A	C	A	0.0661	-0.0278	0.1228	0.8211	POMGNT2	3.42e-10	0.010528	TRUE	39.4195
rs132631	C	A	C	A	0.0661	-0.0278	0.1228	0.8211	POMGNT2	3.42e-10	0.010528	TRUE	39.4195
rs132631	C	A	C	A	0.0661	-0.0278	0.1228	0.8211	POMGNT2	3.42e-10	0.010528	TRUE	39.4195
rs115399595	G	A	G	A	0.16	-0.0828	0.36	0.818	CACNA2D3	1.09e-08	0.027992	TRUE	32.6717
rs115399595	G	A	G	A	0.16	-0.0828	0.36	0.818	CACNA2D3	1.09e-08	0.027992	TRUE	32.6717
rs115399595	G	A	G	A	0.16	-0.0828	0.36	0.818	CACNA2D3	1.09e-08	0.027992	TRUE	32.6717
rs115399595	G	A	G	A	0.16	-0.0828	0.36	0.818	CACNA2D3	1.09e-08	0.027992	TRUE	32.6717
rs115399595	G	A	G	A	0.16	-0.0828	0.36	0.818	CACNA2D3	1.09e-08	0.027992	TRUE	32.6717
rs77265585	C	G	C	G	0.0679	0.0308	0.1329	0.8168	SELP	4.79e-09	0.011598	TRUE	34.2747
rs77265585	C	G	C	G	0.0679	0.0308	0.1329	0.8168	SELP	4.79e-09	0.011598	TRUE	34.2747
rs77265585	C	G	C	G	0.0679	0.0308	0.1329	0.8168	SELP	4.79e-09	0.011598	TRUE	34.2747
rs77265585	C	G	C	G	0.0679	0.0308	0.1329	0.8168	SELP	4.79e-09	0.011598	TRUE	34.2747
rs77265585	C	G	C	G	0.0679	0.0308	0.1329	0.8168	SELP	4.79e-09	0.011598	TRUE	34.2747
rs117959679	G	T	G	T	0.3602	-0.0746	0.3187	0.815	TEX29	6.06e-38	0.027972	TRUE	165.821
rs117959679	G	T	G	T	0.3602	-0.0746	0.3187	0.815	TEX29	6.06e-38	0.027972	TRUE	165.821
rs117959679	G	T	G	T	0.3602	-0.0746	0.3187	0.815	TEX29	6.06e-38	0.027972	TRUE	165.821
rs117959679	G	T	G	T	0.3602	-0.0746	0.3187	0.815	TEX29	6.06e-38	0.027972	TRUE	165.821
rs117959679	G	T	G	T	0.3602	-0.0746	0.3187	0.815	TEX29	6.06e-38	0.027972	TRUE	165.821
rs2043085	C	T	C	T	-0.0648	0.0193	0.0824	0.8146	C5orf38	7.17e-14	0.008658	TRUE	56.0164
rs2043085	C	T	C	T	-0.0648	0.0193	0.0824	0.8146	C5orf38	7.17e-14	0.008658	TRUE	56.0164
rs2043085	C	T	C	T	-0.0648	0.0193	0.0824	0.8146	C5orf38	7.17e-14	0.008658	TRUE	56.0164
rs2043085	C	T	C	T	-0.0648	0.0193	0.0824	0.8146	C5orf38	7.17e-14	0.008658	TRUE	56.0164
rs2043085	C	T	C	T	-0.0648	0.0193	0.0824	0.8146	C5orf38	7.17e-14	0.008658	TRUE	56.0164
rs72799293	A	G	A	G	0.1873	-0.0453	0.1902	0.8119	SH3BGRL3	4.19e-11	0.02839	TRUE	43.5256
rs72799293	A	G	A	G	0.1873	-0.0453	0.1902	0.8119	SH3BGRL3	4.19e-11	0.02839	TRUE	43.5256
rs72799293	A	G	A	G	0.1873	-0.0453	0.1902	0.8119	SH3BGRL3	4.19e-11	0.02839	TRUE	43.5256
rs72799293	A	G	A	G	0.1873	-0.0453	0.1902	0.8119	SH3BGRL3	4.19e-11	0.02839	TRUE	43.5256
rs72799293	A	G	A	G	0.1873	-0.0453	0.1902	0.8119	SH3BGRL3	4.19e-11	0.02839	TRUE	43.5256
rs6993770	T	A	T	A	-0.115	0.0238	0.0982	0.8089	MMP1	3.66e-32	0.009741	TRUE	139.376
rs6993770	T	A	T	A	-0.115	0.0238	0.0982	0.8089	MMP1	3.66e-32	0.009741	TRUE	139.376
rs6993770	T	A	T	A	-0.115	0.0238	0.0982	0.8089	MMP1	3.66e-32	0.009741	TRUE	139.376
rs6993770	T	A	T	A	-0.115	0.0238	0.0982	0.8089	MMP1	3.66e-32	0.009741	TRUE	139.376
rs6993770	T	A	T	A	-0.115	0.0238	0.0982	0.8089	MMP1	3.66e-32	0.009741	TRUE	139.376
rs6993770	T	A	T	A	-0.0565	0.0238	0.0982	0.8089	OAZ1	1.02e-08	0.009865	TRUE	32.8022
rs6993770	T	A	T	A	-0.0565	0.0238	0.0982	0.8089	OAZ1	1.02e-08	0.009865	TRUE	32.8022
rs6993770	T	A	T	A	-0.0565	0.0238	0.0982	0.8089	OAZ1	1.02e-08	0.009865	TRUE	32.8022
rs6993770	T	A	T	A	-0.0565	0.0238	0.0982	0.8089	OAZ1	1.02e-08	0.009865	TRUE	32.8022
rs6993770	T	A	T	A	-0.0565	0.0238	0.0982	0.8089	OAZ1	1.02e-08	0.009865	TRUE	32.8022
rs514808	G	A	G	A	-0.1128	0.0299	0.1235	0.8085	C1QTNF5	1.08e-16	0.013598	TRUE	68.8126
rs514808	G	A	G	A	-0.1128	0.0299	0.1235	0.8085	C1QTNF5	1.08e-16	0.013598	TRUE	68.8126
rs514808	G	A	G	A	-0.1128	0.0299	0.1235	0.8085	C1QTNF5	1.08e-16	0.013598	TRUE	68.8126
rs514808	G	A	G	A	-0.1128	0.0299	0.1235	0.8085	C1QTNF5	1.08e-16	0.013598	TRUE	68.8126
rs514808	G	A	G	A	-0.1128	0.0299	0.1235	0.8085	C1QTNF5	1.08e-16	0.013598	TRUE	68.8126
rs964184	C	G	C	G	-0.0754	-0.0277	0.1143	0.8085	VPS29	8.08e-09	0.013075	TRUE	33.2552
rs964184	C	G	C	G	-0.0754	-0.0277	0.1143	0.8085	VPS29	8.08e-09	0.013075	TRUE	33.2552
rs964184	C	G	C	G	-0.0754	-0.0277	0.1143	0.8085	VPS29	8.08e-09	0.013075	TRUE	33.2552
rs964184	C	G	C	G	-0.0754	-0.0277	0.1143	0.8085	VPS29	8.08e-09	0.013075	TRUE	33.2552
rs964184	C	G	C	G	-0.0754	-0.0277	0.1143	0.8085	VPS29	8.08e-09	0.013075	TRUE	33.2552
rs117633773	A	G	A	G	0.1179	-0.0724	0.2805	0.7962	ADGRE2	1.37e-08	0.020765	TRUE	32.2377
rs117633773	A	G	A	G	0.1179	-0.0724	0.2805	0.7962	ADGRE2	1.37e-08	0.020765	TRUE	32.2377
rs117633773	A	G	A	G	0.1179	-0.0724	0.2805	0.7962	ADGRE2	1.37e-08	0.020765	TRUE	32.2377
rs117633773	A	G	A	G	0.1179	-0.0724	0.2805	0.7962	ADGRE2	1.37e-08	0.020765	TRUE	32.2377
rs117633773	A	G	A	G	0.1179	-0.0724	0.2805	0.7962	ADGRE2	1.37e-08	0.020765	TRUE	32.2377
rs6495460	C	T	C	T	-0.0674	0.038	0.1434	0.791199	LILRA5	3.6e-08	0.012234	TRUE	30.3517
rs6495460	C	T	C	T	-0.0674	0.038	0.1434	0.791199	LILRA5	3.6e-08	0.012234	TRUE	30.3517
rs6495460	C	T	C	T	-0.0674	0.038	0.1434	0.791199	LILRA5	3.6e-08	0.012234	TRUE	30.3517
rs6495460	C	T	C	T	-0.0674	0.038	0.1434	0.791199	LILRA5	3.6e-08	0.012234	TRUE	30.3517
rs6495460	C	T	C	T	-0.0674	0.038	0.1434	0.791199	LILRA5	3.6e-08	0.012234	TRUE	30.3517
rs7621681	C	T	C	T	0.0651	-0.0229	0.0855	0.7892	POMGNT2	1.69e-13	0.008832	TRUE	54.3305
rs7621681	C	T	C	T	0.0651	-0.0229	0.0855	0.7892	POMGNT2	1.69e-13	0.008832	TRUE	54.3305
rs7621681	C	T	C	T	0.0651	-0.0229	0.0855	0.7892	POMGNT2	1.69e-13	0.008832	TRUE	54.3305
rs7621681	C	T	C	T	0.0651	-0.0229	0.0855	0.7892	POMGNT2	1.69e-13	0.008832	TRUE	54.3305
rs7621681	C	T	C	T	0.0651	-0.0229	0.0855	0.7892	POMGNT2	1.69e-13	0.008832	TRUE	54.3305
rs529484504	G	A	G	A	-0.2671	0.0947	0.353	0.7886	MICA	3.26e-18	0.030694	TRUE	75.7253
rs529484504	G	A	G	A	-0.2671	0.0947	0.353	0.7886	MICA	3.26e-18	0.030694	TRUE	75.7253
rs529484504	G	A	G	A	-0.2671	0.0947	0.353	0.7886	MICA	3.26e-18	0.030694	TRUE	75.7253
rs529484504	G	A	G	A	-0.2671	0.0947	0.353	0.7886	MICA	3.26e-18	0.030694	TRUE	75.7253
rs529484504	G	A	G	A	-0.2671	0.0947	0.353	0.7886	MICA	3.26e-18	0.030694	TRUE	75.7253
rs11065979	T	C	T	C	0.0609	-0.0225	0.0835	0.788	MICB	6.15e-15	0.007807	TRUE	60.8508
rs11065979	T	C	T	C	0.0609	-0.0225	0.0835	0.788	MICB	6.15e-15	0.007807	TRUE	60.8508
rs11065979	T	C	T	C	0.0609	-0.0225	0.0835	0.788	MICB	6.15e-15	0.007807	TRUE	60.8508
rs11065979	T	C	T	C	0.0609	-0.0225	0.0835	0.788	MICB	6.15e-15	0.007807	TRUE	60.8508
rs11065979	T	C	T	C	0.0609	-0.0225	0.0835	0.788	MICB	6.15e-15	0.007807	TRUE	60.8508
rs11190141	T	C	T	C	0.0477	-0.0222	0.0814	0.785301	MMP1	1.64e-08	0.008448	TRUE	31.8808
rs11190141	T	C	T	C	0.0477	-0.0222	0.0814	0.785301	MMP1	1.64e-08	0.008448	TRUE	31.8808
rs11190141	T	C	T	C	0.0477	-0.0222	0.0814	0.785301	MMP1	1.64e-08	0.008448	TRUE	31.8808
rs11190141	T	C	T	C	0.0477	-0.0222	0.0814	0.785301	MMP1	1.64e-08	0.008448	TRUE	31.8808
rs11190141	T	C	T	C	0.0477	-0.0222	0.0814	0.785301	MMP1	1.64e-08	0.008448	TRUE	31.8808
rs35340377	A	G	A	G	-0.059	-0.0244	0.0896	0.785199	OAZ1	6.5e-10	0.00955	TRUE	38.1678
rs35340377	A	G	A	G	-0.059	-0.0244	0.0896	0.785199	OAZ1	6.5e-10	0.00955	TRUE	38.1678
rs35340377	A	G	A	G	-0.059	-0.0244	0.0896	0.785199	OAZ1	6.5e-10	0.00955	TRUE	38.1678
rs35340377	A	G	A	G	-0.059	-0.0244	0.0896	0.785199	OAZ1	6.5e-10	0.00955	TRUE	38.1678
rs35340377	A	G	A	G	-0.059	-0.0244	0.0896	0.785199	OAZ1	6.5e-10	0.00955	TRUE	38.1678
rs201843067	C	T	C	T	0.0586	0.0236	0.0854	0.7824	POMGNT2	4.02e-13	0.008077	TRUE	52.6375
rs201843067	C	T	C	T	0.0586	0.0236	0.0854	0.7824	POMGNT2	4.02e-13	0.008077	TRUE	52.6375
rs201843067	C	T	C	T	0.0586	0.0236	0.0854	0.7824	POMGNT2	4.02e-13	0.008077	TRUE	52.6375
rs201843067	C	T	C	T	0.0586	0.0236	0.0854	0.7824	POMGNT2	4.02e-13	0.008077	TRUE	52.6375
rs201843067	C	T	C	T	0.0586	0.0236	0.0854	0.7824	POMGNT2	4.02e-13	0.008077	TRUE	52.6375
rs7418108	C	G	C	G	-0.0876	0.0311	0.1115	0.7805	GNPTG	7.88e-16	0.010874	TRUE	64.8977
rs7418108	C	G	C	G	-0.0876	0.0311	0.1115	0.7805	GNPTG	7.88e-16	0.010874	TRUE	64.8977
rs7418108	C	G	C	G	-0.0876	0.0311	0.1115	0.7805	GNPTG	7.88e-16	0.010874	TRUE	64.8977
rs7418108	C	G	C	G	-0.0876	0.0311	0.1115	0.7805	GNPTG	7.88e-16	0.010874	TRUE	64.8977
rs7418108	C	G	C	G	-0.0876	0.0311	0.1115	0.7805	GNPTG	7.88e-16	0.010874	TRUE	64.8977
rs2427291	A	G	A	G	0.0625	0.0333	0.1167	0.7754	HN1	2.74e-08	0.011246	TRUE	30.8862
rs2427291	A	G	A	G	0.0625	0.0333	0.1167	0.7754	HN1	2.74e-08	0.011246	TRUE	30.8862
rs2427291	A	G	A	G	0.0625	0.0333	0.1167	0.7754	HN1	2.74e-08	0.011246	TRUE	30.8862
rs2427291	A	G	A	G	0.0625	0.0333	0.1167	0.7754	HN1	2.74e-08	0.011246	TRUE	30.8862
rs2427291	A	G	A	G	0.0625	0.0333	0.1167	0.7754	HN1	2.74e-08	0.011246	TRUE	30.8862
rs11647069	C	T	C	T	-0.3512	0.0255	0.0876	0.7712	HP	0	0.006222	TRUE	3186.02
rs11647069	C	T	C	T	-0.3512	0.0255	0.0876	0.7712	HP	0	0.006222	TRUE	3186.02
rs11647069	C	T	C	T	-0.3512	0.0255	0.0876	0.7712	HP	0	0.006222	TRUE	3186.02
rs11647069	C	T	C	T	-0.3512	0.0255	0.0876	0.7712	HP	0	0.006222	TRUE	3186.02
rs11647069	C	T	C	T	-0.3512	0.0255	0.0876	0.7712	HP	0	0.006222	TRUE	3186.02
rs1352413	A	G	A	G	0.1302	0.0361	0.1242	0.771101	PSMB9	4.35e-17	0.015494	TRUE	70.6147
rs1352413	A	G	A	G	0.1302	0.0361	0.1242	0.771101	PSMB9	4.35e-17	0.015494	TRUE	70.6147
rs1352413	A	G	A	G	0.1302	0.0361	0.1242	0.771101	PSMB9	4.35e-17	0.015494	TRUE	70.6147
rs1352413	A	G	A	G	0.1302	0.0361	0.1242	0.771101	PSMB9	4.35e-17	0.015494	TRUE	70.6147
rs1352413	A	G	A	G	0.1302	0.0361	0.1242	0.771101	PSMB9	4.35e-17	0.015494	TRUE	70.6147
rs11102329	C	T	C	T	-0.0824	0.0341	0.117	0.770699	GSTM3	5.95e-10	0.013308	TRUE	38.3379
rs11102329	C	T	C	T	-0.0824	0.0341	0.117	0.770699	GSTM3	5.95e-10	0.013308	TRUE	38.3379
rs11102329	C	T	C	T	-0.0824	0.0341	0.117	0.770699	GSTM3	5.95e-10	0.013308	TRUE	38.3379
rs11102329	C	T	C	T	-0.0824	0.0341	0.117	0.770699	GSTM3	5.95e-10	0.013308	TRUE	38.3379
rs11102329	C	T	C	T	-0.0824	0.0341	0.117	0.770699	GSTM3	5.95e-10	0.013308	TRUE	38.3379
rs72827584	T	C	T	C	-0.0778	0.0488	0.1647	0.767201	NPTX1	1.22e-08	0.013658	TRUE	32.4478
rs72827584	T	C	T	C	-0.0778	0.0488	0.1647	0.767201	NPTX1	1.22e-08	0.013658	TRUE	32.4478
rs72827584	T	C	T	C	-0.0778	0.0488	0.1647	0.767201	NPTX1	1.22e-08	0.013658	TRUE	32.4478
rs72827584	T	C	T	C	-0.0778	0.0488	0.1647	0.767201	NPTX1	1.22e-08	0.013658	TRUE	32.4478
rs72827584	T	C	T	C	-0.0778	0.0488	0.1647	0.767201	NPTX1	1.22e-08	0.013658	TRUE	32.4478
rs509227	C	A	C	A	0.0478	0.0249	0.0819	0.760901	LILRA5	2.02e-08	0.008519	TRUE	31.4832
rs509227	C	A	C	A	0.0478	0.0249	0.0819	0.760901	LILRA5	2.02e-08	0.008519	TRUE	31.4832
rs509227	C	A	C	A	0.0478	0.0249	0.0819	0.760901	LILRA5	2.02e-08	0.008519	TRUE	31.4832
rs509227	C	A	C	A	0.0478	0.0249	0.0819	0.760901	LILRA5	2.02e-08	0.008519	TRUE	31.4832
rs509227	C	A	C	A	0.0478	0.0249	0.0819	0.760901	LILRA5	2.02e-08	0.008519	TRUE	31.4832
rs142406029	C	T	C	T	0.1336	0.0772	0.2528	0.7602	PGP	3.24e-09	0.022571	TRUE	35.0357
rs142406029	C	T	C	T	0.1336	0.0772	0.2528	0.7602	PGP	3.24e-09	0.022571	TRUE	35.0357
rs142406029	C	T	C	T	0.1336	0.0772	0.2528	0.7602	PGP	3.24e-09	0.022571	TRUE	35.0357
rs142406029	C	T	C	T	0.1336	0.0772	0.2528	0.7602	PGP	3.24e-09	0.022571	TRUE	35.0357
rs142406029	C	T	C	T	0.1336	0.0772	0.2528	0.7602	PGP	3.24e-09	0.022571	TRUE	35.0357
rs4665972	C	T	C	T	-0.0644	0.0257	0.0842	0.759799	TDO2	1.02e-13	0.008657	TRUE	55.3397
rs4665972	C	T	C	T	-0.0644	0.0257	0.0842	0.759799	TDO2	1.02e-13	0.008657	TRUE	55.3397
rs4665972	C	T	C	T	-0.0644	0.0257	0.0842	0.759799	TDO2	1.02e-13	0.008657	TRUE	55.3397
rs4665972	C	T	C	T	-0.0644	0.0257	0.0842	0.759799	TDO2	1.02e-13	0.008657	TRUE	55.3397
rs4665972	C	T	C	T	-0.0644	0.0257	0.0842	0.759799	TDO2	1.02e-13	0.008657	TRUE	55.3397
rs872914	A	G	A	G	-0.0605	-0.0273	0.0893	0.7597	NPFF	5.44e-12	0.008776	TRUE	47.5245
rs872914	A	G	A	G	-0.0605	-0.0273	0.0893	0.7597	NPFF	5.44e-12	0.008776	TRUE	47.5245
rs872914	A	G	A	G	-0.0605	-0.0273	0.0893	0.7597	NPFF	5.44e-12	0.008776	TRUE	47.5245
rs872914	A	G	A	G	-0.0605	-0.0273	0.0893	0.7597	NPFF	5.44e-12	0.008776	TRUE	47.5245
rs872914	A	G	A	G	-0.0605	-0.0273	0.0893	0.7597	NPFF	5.44e-12	0.008776	TRUE	47.5245
rs872914	A	G	A	G	-0.0638	-0.0273	0.0893	0.7597	PSMB9	2.38e-13	0.008709	TRUE	53.6667
rs872914	A	G	A	G	-0.0638	-0.0273	0.0893	0.7597	PSMB9	2.38e-13	0.008709	TRUE	53.6667
rs872914	A	G	A	G	-0.0638	-0.0273	0.0893	0.7597	PSMB9	2.38e-13	0.008709	TRUE	53.6667
rs872914	A	G	A	G	-0.0638	-0.0273	0.0893	0.7597	PSMB9	2.38e-13	0.008709	TRUE	53.6667
rs872914	A	G	A	G	-0.0638	-0.0273	0.0893	0.7597	PSMB9	2.38e-13	0.008709	TRUE	53.6667
rs2229092	C	A	C	A	-0.3122	0.0554	0.179	0.756901	MICB	2.91e-73	0.017244	TRUE	327.786
rs2229092	C	A	C	A	-0.3122	0.0554	0.179	0.756901	MICB	2.91e-73	0.017244	TRUE	327.786
rs2229092	C	A	C	A	-0.3122	0.0554	0.179	0.756901	MICB	2.91e-73	0.017244	TRUE	327.786
rs2229092	C	A	C	A	-0.3122	0.0554	0.179	0.756901	MICB	2.91e-73	0.017244	TRUE	327.786
rs2229092	C	A	C	A	-0.3122	0.0554	0.179	0.756901	MICB	2.91e-73	0.017244	TRUE	327.786
rs1892548	C	T	C	T	-0.0546	0.0279	0.0893	0.754899	LILRA5	9.55e-10	0.008926	TRUE	37.4172
rs1892548	C	T	C	T	-0.0546	0.0279	0.0893	0.754899	LILRA5	9.55e-10	0.008926	TRUE	37.4172
rs1892548	C	T	C	T	-0.0546	0.0279	0.0893	0.754899	LILRA5	9.55e-10	0.008926	TRUE	37.4172
rs1892548	C	T	C	T	-0.0546	0.0279	0.0893	0.754899	LILRA5	9.55e-10	0.008926	TRUE	37.4172
rs1892548	C	T	C	T	-0.0546	0.0279	0.0893	0.754899	LILRA5	9.55e-10	0.008926	TRUE	37.4172
rs371622820	C	G	C	G	0.0583	-0.03	0.0922	0.7446	ADGRE2	3.06e-09	0.009834	TRUE	35.1461
rs371622820	C	G	C	G	0.0583	-0.03	0.0922	0.7446	ADGRE2	3.06e-09	0.009834	TRUE	35.1461
rs371622820	C	G	C	G	0.0583	-0.03	0.0922	0.7446	ADGRE2	3.06e-09	0.009834	TRUE	35.1461
rs371622820	C	G	C	G	0.0583	-0.03	0.0922	0.7446	ADGRE2	3.06e-09	0.009834	TRUE	35.1461
rs371622820	C	G	C	G	0.0583	-0.03	0.0922	0.7446	ADGRE2	3.06e-09	0.009834	TRUE	35.1461
rs371622820	C	G	C	G	0.0878	-0.03	0.0922	0.7446	C1QTNF5	1.63e-19	0.009717	TRUE	81.6441
rs371622820	C	G	C	G	0.0878	-0.03	0.0922	0.7446	C1QTNF5	1.63e-19	0.009717	TRUE	81.6441
rs371622820	C	G	C	G	0.0878	-0.03	0.0922	0.7446	C1QTNF5	1.63e-19	0.009717	TRUE	81.6441
rs371622820	C	G	C	G	0.0878	-0.03	0.0922	0.7446	C1QTNF5	1.63e-19	0.009717	TRUE	81.6441
rs371622820	C	G	C	G	0.0878	-0.03	0.0922	0.7446	C1QTNF5	1.63e-19	0.009717	TRUE	81.6441
rs697356	C	G	C	G	0.0799	-0.0286	0.0876	0.7443	PHGDH	1.49e-19	0.008833	TRUE	81.8233
rs697356	C	G	C	G	0.0799	-0.0286	0.0876	0.7443	PHGDH	1.49e-19	0.008833	TRUE	81.8233
rs697356	C	G	C	G	0.0799	-0.0286	0.0876	0.7443	PHGDH	1.49e-19	0.008833	TRUE	81.8233
rs697356	C	G	C	G	0.0799	-0.0286	0.0876	0.7443	PHGDH	1.49e-19	0.008833	TRUE	81.8233
rs697356	C	G	C	G	0.0799	-0.0286	0.0876	0.7443	PHGDH	1.49e-19	0.008833	TRUE	81.8233
rs7503460	G	A	G	A	0.0731	-0.0271	0.0824	0.7426	NPTX1	4.44e-17	0.008702	TRUE	70.5662
rs7503460	G	A	G	A	0.0731	-0.0271	0.0824	0.7426	NPTX1	4.44e-17	0.008702	TRUE	70.5662
rs7503460	G	A	G	A	0.0731	-0.0271	0.0824	0.7426	NPTX1	4.44e-17	0.008702	TRUE	70.5662
rs7503460	G	A	G	A	0.0731	-0.0271	0.0824	0.7426	NPTX1	4.44e-17	0.008702	TRUE	70.5662
rs7503460	G	A	G	A	0.0731	-0.0271	0.0824	0.7426	NPTX1	4.44e-17	0.008702	TRUE	70.5662
rs7828113	G	A	G	A	-0.0492	-0.0283	0.0854	0.7408	C5orf38	2.2e-08	0.008793	TRUE	31.3081
rs7828113	G	A	G	A	-0.0492	-0.0283	0.0854	0.7408	C5orf38	2.2e-08	0.008793	TRUE	31.3081
rs7828113	G	A	G	A	-0.0492	-0.0283	0.0854	0.7408	C5orf38	2.2e-08	0.008793	TRUE	31.3081
rs7828113	G	A	G	A	-0.0492	-0.0283	0.0854	0.7408	C5orf38	2.2e-08	0.008793	TRUE	31.3081
rs7828113	G	A	G	A	-0.0492	-0.0283	0.0854	0.7408	C5orf38	2.2e-08	0.008793	TRUE	31.3081
rs149665569	T	C	T	C	-0.2733	0.0583	0.1749	0.7388	HP	1.57e-12	0.038667	TRUE	49.9572
rs149665569	T	C	T	C	-0.2733	0.0583	0.1749	0.7388	HP	1.57e-12	0.038667	TRUE	49.9572
rs149665569	T	C	T	C	-0.2733	0.0583	0.1749	0.7388	HP	1.57e-12	0.038667	TRUE	49.9572
rs149665569	T	C	T	C	-0.2733	0.0583	0.1749	0.7388	HP	1.57e-12	0.038667	TRUE	49.9572
rs149665569	T	C	T	C	-0.2733	0.0583	0.1749	0.7388	HP	1.57e-12	0.038667	TRUE	49.9572
rs62438066	T	C	T	C	-0.1321	0.0993	0.2969	0.7381	TDO2	3.07e-08	0.023855	TRUE	30.6653
rs62438066	T	C	T	C	-0.1321	0.0993	0.2969	0.7381	TDO2	3.07e-08	0.023855	TRUE	30.6653
rs62438066	T	C	T	C	-0.1321	0.0993	0.2969	0.7381	TDO2	3.07e-08	0.023855	TRUE	30.6653
rs62438066	T	C	T	C	-0.1321	0.0993	0.2969	0.7381	TDO2	3.07e-08	0.023855	TRUE	30.6653
rs62438066	T	C	T	C	-0.1321	0.0993	0.2969	0.7381	TDO2	3.07e-08	0.023855	TRUE	30.6653
rs3094379	C	T	C	T	0.0781	0.0387	0.1151	0.7366	MICB	9.14e-10	0.012754	TRUE	37.4981
rs3094379	C	T	C	T	0.0781	0.0387	0.1151	0.7366	MICB	9.14e-10	0.012754	TRUE	37.4981
rs3094379	C	T	C	T	0.0781	0.0387	0.1151	0.7366	MICB	9.14e-10	0.012754	TRUE	37.4981
rs3094379	C	T	C	T	0.0781	0.0387	0.1151	0.7366	MICB	9.14e-10	0.012754	TRUE	37.4981
rs3094379	C	T	C	T	0.0781	0.0387	0.1151	0.7366	MICB	9.14e-10	0.012754	TRUE	37.4981
rs6030	C	T	C	T	-0.0494	0.0298	0.0883	0.736	C11orf87	7.71e-09	0.008555	TRUE	33.3437
rs6030	C	T	C	T	-0.0494	0.0298	0.0883	0.736	C11orf87	7.71e-09	0.008555	TRUE	33.3437
rs6030	C	T	C	T	-0.0494	0.0298	0.0883	0.736	C11orf87	7.71e-09	0.008555	TRUE	33.3437
rs6030	C	T	C	T	-0.0494	0.0298	0.0883	0.736	C11orf87	7.71e-09	0.008555	TRUE	33.3437
rs6030	C	T	C	T	-0.0494	0.0298	0.0883	0.736	C11orf87	7.71e-09	0.008555	TRUE	33.3437
rs6457457	T	C	T	C	0.1004	0.0556	0.1644	0.734999	HN1	7.36e-10	0.016303	TRUE	37.9256
rs6457457	T	C	T	C	0.1004	0.0556	0.1644	0.734999	HN1	7.36e-10	0.016303	TRUE	37.9256
rs6457457	T	C	T	C	0.1004	0.0556	0.1644	0.734999	HN1	7.36e-10	0.016303	TRUE	37.9256
rs6457457	T	C	T	C	0.1004	0.0556	0.1644	0.734999	HN1	7.36e-10	0.016303	TRUE	37.9256
rs6457457	T	C	T	C	0.1004	0.0556	0.1644	0.734999	HN1	7.36e-10	0.016303	TRUE	37.9256
rs190086576	A	G	A	G	0.3383	-0.1438	0.4215	0.733	ING4	5.81e-21	0.036015	TRUE	88.2342
rs190086576	A	G	A	G	0.3383	-0.1438	0.4215	0.733	ING4	5.81e-21	0.036015	TRUE	88.2342
rs190086576	A	G	A	G	0.3383	-0.1438	0.4215	0.733	ING4	5.81e-21	0.036015	TRUE	88.2342
rs190086576	A	G	A	G	0.3383	-0.1438	0.4215	0.733	ING4	5.81e-21	0.036015	TRUE	88.2342
rs190086576	A	G	A	G	0.3383	-0.1438	0.4215	0.733	ING4	5.81e-21	0.036015	TRUE	88.2342
rs7658970	C	T	C	T	-0.0485	-0.0306	0.0894	0.7322	HN1	4.36e-08	0.008858	TRUE	29.9787
rs7658970	C	T	C	T	-0.0485	-0.0306	0.0894	0.7322	HN1	4.36e-08	0.008858	TRUE	29.9787
rs7658970	C	T	C	T	-0.0485	-0.0306	0.0894	0.7322	HN1	4.36e-08	0.008858	TRUE	29.9787
rs7658970	C	T	C	T	-0.0485	-0.0306	0.0894	0.7322	HN1	4.36e-08	0.008858	TRUE	29.9787
rs7658970	C	T	C	T	-0.0485	-0.0306	0.0894	0.7322	HN1	4.36e-08	0.008858	TRUE	29.9787
rs565840574	G	A	G	A	0.0651	0.0295	0.0843	0.726099	HSPG2	1.07e-13	0.00876	TRUE	55.2273
rs565840574	G	A	G	A	0.0651	0.0295	0.0843	0.726099	HSPG2	1.07e-13	0.00876	TRUE	55.2273
rs565840574	G	A	G	A	0.0651	0.0295	0.0843	0.726099	HSPG2	1.07e-13	0.00876	TRUE	55.2273
rs565840574	G	A	G	A	0.0651	0.0295	0.0843	0.726099	HSPG2	1.07e-13	0.00876	TRUE	55.2273
rs565840574	G	A	G	A	0.0651	0.0295	0.0843	0.726099	HSPG2	1.07e-13	0.00876	TRUE	55.2273
rs565840574	G	A	G	A	0.0756	0.0295	0.0843	0.726099	MYOC	1.59e-18	0.008607	TRUE	77.1507
rs565840574	G	A	G	A	0.0756	0.0295	0.0843	0.726099	MYOC	1.59e-18	0.008607	TRUE	77.1507
rs565840574	G	A	G	A	0.0756	0.0295	0.0843	0.726099	MYOC	1.59e-18	0.008607	TRUE	77.1507
rs565840574	G	A	G	A	0.0756	0.0295	0.0843	0.726099	MYOC	1.59e-18	0.008607	TRUE	77.1507
rs565840574	G	A	G	A	0.0756	0.0295	0.0843	0.726099	MYOC	1.59e-18	0.008607	TRUE	77.1507
rs565840574	G	A	G	A	0.0586	0.0295	0.0843	0.726099	NPTX1	9e-12	0.00859	TRUE	46.5381
rs565840574	G	A	G	A	0.0586	0.0295	0.0843	0.726099	NPTX1	9e-12	0.00859	TRUE	46.5381
rs565840574	G	A	G	A	0.0586	0.0295	0.0843	0.726099	NPTX1	9e-12	0.00859	TRUE	46.5381
rs565840574	G	A	G	A	0.0586	0.0295	0.0843	0.726099	NPTX1	9e-12	0.00859	TRUE	46.5381
rs565840574	G	A	G	A	0.0586	0.0295	0.0843	0.726099	NPTX1	9e-12	0.00859	TRUE	46.5381
rs74765295	T	C	T	C	-0.7631	0.1713	0.4886	0.726001	SPINK6	5.92e-56	0.048422	TRUE	248.358
rs74765295	T	C	T	C	-0.7631	0.1713	0.4886	0.726001	SPINK6	5.92e-56	0.048422	TRUE	248.358
rs74765295	T	C	T	C	-0.7631	0.1713	0.4886	0.726001	SPINK6	5.92e-56	0.048422	TRUE	248.358
rs74765295	T	C	T	C	-0.7631	0.1713	0.4886	0.726001	SPINK6	5.92e-56	0.048422	TRUE	248.358
rs74765295	T	C	T	C	-0.7631	0.1713	0.4886	0.726001	SPINK6	5.92e-56	0.048422	TRUE	248.358
rs17647647	C	T	C	T	-0.0931	0.0388	0.1102	0.725	TDO2	1.21e-18	0.010563	TRUE	77.6828
rs17647647	C	T	C	T	-0.0931	0.0388	0.1102	0.725	TDO2	1.21e-18	0.010563	TRUE	77.6828
rs17647647	C	T	C	T	-0.0931	0.0388	0.1102	0.725	TDO2	1.21e-18	0.010563	TRUE	77.6828
rs17647647	C	T	C	T	-0.0931	0.0388	0.1102	0.725	TDO2	1.21e-18	0.010563	TRUE	77.6828
rs17647647	C	T	C	T	-0.0931	0.0388	0.1102	0.725	TDO2	1.21e-18	0.010563	TRUE	77.6828
rs7192233	T	C	T	C	-0.1299	-0.0675	0.1891	0.721	GNPTG	1.04e-13	0.01747	TRUE	55.2882
rs7192233	T	C	T	C	-0.1299	-0.0675	0.1891	0.721	GNPTG	1.04e-13	0.01747	TRUE	55.2882
rs7192233	T	C	T	C	-0.1299	-0.0675	0.1891	0.721	GNPTG	1.04e-13	0.01747	TRUE	55.2882
rs7192233	T	C	T	C	-0.1299	-0.0675	0.1891	0.721	GNPTG	1.04e-13	0.01747	TRUE	55.2882
rs7192233	T	C	T	C	-0.1299	-0.0675	0.1891	0.721	GNPTG	1.04e-13	0.01747	TRUE	55.2882
rs56336341	T	C	T	C	-0.0835	-0.0324	0.0895	0.717399	NID2	8.58e-22	0.008705	TRUE	92.0101
rs56336341	T	C	T	C	-0.0835	-0.0324	0.0895	0.717399	NID2	8.58e-22	0.008705	TRUE	92.0101
rs56336341	T	C	T	C	-0.0835	-0.0324	0.0895	0.717399	NID2	8.58e-22	0.008705	TRUE	92.0101
rs56336341	T	C	T	C	-0.0835	-0.0324	0.0895	0.717399	NID2	8.58e-22	0.008705	TRUE	92.0101
rs56336341	T	C	T	C	-0.0835	-0.0324	0.0895	0.717399	NID2	8.58e-22	0.008705	TRUE	92.0101
rs11066301	G	A	G	A	0.0546	-0.0301	0.083	0.716699	POMGNT2	3.82e-11	0.008259	TRUE	43.7049
rs11066301	G	A	G	A	0.0546	-0.0301	0.083	0.716699	POMGNT2	3.82e-11	0.008259	TRUE	43.7049
rs11066301	G	A	G	A	0.0546	-0.0301	0.083	0.716699	POMGNT2	3.82e-11	0.008259	TRUE	43.7049
rs11066301	G	A	G	A	0.0546	-0.0301	0.083	0.716699	POMGNT2	3.82e-11	0.008259	TRUE	43.7049
rs11066301	G	A	G	A	0.0546	-0.0301	0.083	0.716699	POMGNT2	3.82e-11	0.008259	TRUE	43.7049
rs34061452	G	A	G	A	0.0618	-0.0451	0.1221	0.7122	LGALS3BP	2.58e-08	0.011099	TRUE	31.0034
rs34061452	G	A	G	A	0.0618	-0.0451	0.1221	0.7122	LGALS3BP	2.58e-08	0.011099	TRUE	31.0034
rs34061452	G	A	G	A	0.0618	-0.0451	0.1221	0.7122	LGALS3BP	2.58e-08	0.011099	TRUE	31.0034
rs34061452	G	A	G	A	0.0618	-0.0451	0.1221	0.7122	LGALS3BP	2.58e-08	0.011099	TRUE	31.0034
rs34061452	G	A	G	A	0.0618	-0.0451	0.1221	0.7122	LGALS3BP	2.58e-08	0.011099	TRUE	31.0034
rs3764261	A	C	A	C	0.074	-0.0336	0.0908	0.711001	APOM	2.84e-17	0.008754	TRUE	71.4579
rs3764261	A	C	A	C	0.074	-0.0336	0.0908	0.711001	APOM	2.84e-17	0.008754	TRUE	71.4579
rs3764261	A	C	A	C	0.074	-0.0336	0.0908	0.711001	APOM	2.84e-17	0.008754	TRUE	71.4579
rs3764261	A	C	A	C	0.074	-0.0336	0.0908	0.711001	APOM	2.84e-17	0.008754	TRUE	71.4579
rs3764261	A	C	A	C	0.074	-0.0336	0.0908	0.711001	APOM	2.84e-17	0.008754	TRUE	71.4579
rs3811444	T	C	T	C	-0.057	0.0319	0.0859	0.710699	MMP1	4.38e-11	0.008649	TRUE	43.4328
rs3811444	T	C	T	C	-0.057	0.0319	0.0859	0.710699	MMP1	4.38e-11	0.008649	TRUE	43.4328
rs3811444	T	C	T	C	-0.057	0.0319	0.0859	0.710699	MMP1	4.38e-11	0.008649	TRUE	43.4328
rs3811444	T	C	T	C	-0.057	0.0319	0.0859	0.710699	MMP1	4.38e-11	0.008649	TRUE	43.4328
rs3811444	T	C	T	C	-0.057	0.0319	0.0859	0.710699	MMP1	4.38e-11	0.008649	TRUE	43.4328
rs59147390	C	T	C	T	-0.1076	0.0544	0.1411	0.6998	C5orf38	1.68e-12	0.015243	TRUE	49.8292
rs59147390	C	T	C	T	-0.1076	0.0544	0.1411	0.6998	C5orf38	1.68e-12	0.015243	TRUE	49.8292
rs59147390	C	T	C	T	-0.1076	0.0544	0.1411	0.6998	C5orf38	1.68e-12	0.015243	TRUE	49.8292
rs59147390	C	T	C	T	-0.1076	0.0544	0.1411	0.6998	C5orf38	1.68e-12	0.015243	TRUE	49.8292
rs59147390	C	T	C	T	-0.1076	0.0544	0.1411	0.6998	C5orf38	1.68e-12	0.015243	TRUE	49.8292
rs12718731	G	A	G	A	0.048	0.0335	0.0867	0.6995	PKLR	2.19e-08	0.008577	TRUE	31.3193
rs12718731	G	A	G	A	0.048	0.0335	0.0867	0.6995	PKLR	2.19e-08	0.008577	TRUE	31.3193
rs12718731	G	A	G	A	0.048	0.0335	0.0867	0.6995	PKLR	2.19e-08	0.008577	TRUE	31.3193
rs12718731	G	A	G	A	0.048	0.0335	0.0867	0.6995	PKLR	2.19e-08	0.008577	TRUE	31.3193
rs12718731	G	A	G	A	0.048	0.0335	0.0867	0.6995	PKLR	2.19e-08	0.008577	TRUE	31.3193
rs187029855	C	T	C	T	-0.1472	-0.0966	0.2482	0.697	MREG	2.24e-10	0.023204	TRUE	40.243
rs187029855	C	T	C	T	-0.1472	-0.0966	0.2482	0.697	MREG	2.24e-10	0.023204	TRUE	40.243
rs187029855	C	T	C	T	-0.1472	-0.0966	0.2482	0.697	MREG	2.24e-10	0.023204	TRUE	40.243
rs187029855	C	T	C	T	-0.1472	-0.0966	0.2482	0.697	MREG	2.24e-10	0.023204	TRUE	40.243
rs187029855	C	T	C	T	-0.1472	-0.0966	0.2482	0.697	MREG	2.24e-10	0.023204	TRUE	40.243
rs57035659	A	G	A	G	-0.2471	-0.1257	0.3199	0.6945	HP	2.01e-22	0.025366	TRUE	94.8946
rs57035659	A	G	A	G	-0.2471	-0.1257	0.3199	0.6945	HP	2.01e-22	0.025366	TRUE	94.8946
rs57035659	A	G	A	G	-0.2471	-0.1257	0.3199	0.6945	HP	2.01e-22	0.025366	TRUE	94.8946
rs57035659	A	G	A	G	-0.2471	-0.1257	0.3199	0.6945	HP	2.01e-22	0.025366	TRUE	94.8946
rs57035659	A	G	A	G	-0.2471	-0.1257	0.3199	0.6945	HP	2.01e-22	0.025366	TRUE	94.8946
rs12458752	G	A	G	A	-0.0537	0.0327	0.0831	0.6937	NCAN	8.51e-10	0.008753	TRUE	37.6387
rs12458752	G	A	G	A	-0.0537	0.0327	0.0831	0.6937	NCAN	8.51e-10	0.008753	TRUE	37.6387
rs12458752	G	A	G	A	-0.0537	0.0327	0.0831	0.6937	NCAN	8.51e-10	0.008753	TRUE	37.6387
rs12458752	G	A	G	A	-0.0537	0.0327	0.0831	0.6937	NCAN	8.51e-10	0.008753	TRUE	37.6387
rs12458752	G	A	G	A	-0.0537	0.0327	0.0831	0.6937	NCAN	8.51e-10	0.008753	TRUE	37.6387
rs145666159	C	G	C	G	0.1343	0.0829	0.2091	0.6917	CACNA2D3	2.47e-08	0.024088	TRUE	31.085
rs145666159	C	G	C	G	0.1343	0.0829	0.2091	0.6917	CACNA2D3	2.47e-08	0.024088	TRUE	31.085
rs145666159	C	G	C	G	0.1343	0.0829	0.2091	0.6917	CACNA2D3	2.47e-08	0.024088	TRUE	31.085
rs145666159	C	G	C	G	0.1343	0.0829	0.2091	0.6917	CACNA2D3	2.47e-08	0.024088	TRUE	31.085
rs145666159	C	G	C	G	0.1343	0.0829	0.2091	0.6917	CACNA2D3	2.47e-08	0.024088	TRUE	31.085
rs793010	T	C	T	C	0.0878	-0.042	0.1047	0.687999	C1QTNF5	2.55e-18	0.010057	TRUE	76.217
rs793010	T	C	T	C	0.0878	-0.042	0.1047	0.687999	C1QTNF5	2.55e-18	0.010057	TRUE	76.217
rs793010	T	C	T	C	0.0878	-0.042	0.1047	0.687999	C1QTNF5	2.55e-18	0.010057	TRUE	76.217
rs793010	T	C	T	C	0.0878	-0.042	0.1047	0.687999	C1QTNF5	2.55e-18	0.010057	TRUE	76.217
rs793010	T	C	T	C	0.0878	-0.042	0.1047	0.687999	C1QTNF5	2.55e-18	0.010057	TRUE	76.217
rs11789769	T	C	T	C	0.0851	-0.0684	0.1676	0.683299	MMP1	1.12e-09	0.01397	TRUE	37.1079
rs11789769	T	C	T	C	0.0851	-0.0684	0.1676	0.683299	MMP1	1.12e-09	0.01397	TRUE	37.1079
rs11789769	T	C	T	C	0.0851	-0.0684	0.1676	0.683299	MMP1	1.12e-09	0.01397	TRUE	37.1079
rs11789769	T	C	T	C	0.0851	-0.0684	0.1676	0.683299	MMP1	1.12e-09	0.01397	TRUE	37.1079
rs11789769	T	C	T	C	0.0851	-0.0684	0.1676	0.683299	MMP1	1.12e-09	0.01397	TRUE	37.1079
rs11626009	T	A	T	A	0.2216	-0.0702	0.1718	0.6829	DCP1B	6.92e-11	0.033975	TRUE	42.5423
rs11626009	T	A	T	A	0.2216	-0.0702	0.1718	0.6829	DCP1B	6.92e-11	0.033975	TRUE	42.5423
rs11626009	T	A	T	A	0.2216	-0.0702	0.1718	0.6829	DCP1B	6.92e-11	0.033975	TRUE	42.5423
rs11626009	T	A	T	A	0.2216	-0.0702	0.1718	0.6829	DCP1B	6.92e-11	0.033975	TRUE	42.5423
rs11626009	T	A	T	A	0.2216	-0.0702	0.1718	0.6829	DCP1B	6.92e-11	0.033975	TRUE	42.5423
rs2254620	A	G	A	G	-0.2691	0.0896	0.2193	0.6827	MICB	1.2e-27	0.024696	TRUE	118.734
rs2254620	A	G	A	G	-0.2691	0.0896	0.2193	0.6827	MICB	1.2e-27	0.024696	TRUE	118.734
rs2254620	A	G	A	G	-0.2691	0.0896	0.2193	0.6827	MICB	1.2e-27	0.024696	TRUE	118.734
rs2254620	A	G	A	G	-0.2691	0.0896	0.2193	0.6827	MICB	1.2e-27	0.024696	TRUE	118.734
rs2254620	A	G	A	G	-0.2691	0.0896	0.2193	0.6827	MICB	1.2e-27	0.024696	TRUE	118.734
rs13389409	C	T	C	T	-0.0542	0.0356	0.0868	0.681299	CACNA2D3	1.8e-10	0.008498	TRUE	40.6785
rs13389409	C	T	C	T	-0.0542	0.0356	0.0868	0.681299	CACNA2D3	1.8e-10	0.008498	TRUE	40.6785
rs13389409	C	T	C	T	-0.0542	0.0356	0.0868	0.681299	CACNA2D3	1.8e-10	0.008498	TRUE	40.6785
rs13389409	C	T	C	T	-0.0542	0.0356	0.0868	0.681299	CACNA2D3	1.8e-10	0.008498	TRUE	40.6785
rs13389409	C	T	C	T	-0.0542	0.0356	0.0868	0.681299	CACNA2D3	1.8e-10	0.008498	TRUE	40.6785
rs79024610	T	C	T	C	-0.1473	-0.2214	0.5275	0.6747	MICA	1.94e-09	0.024538	TRUE	36.0352
rs79024610	T	C	T	C	-0.1473	-0.2214	0.5275	0.6747	MICA	1.94e-09	0.024538	TRUE	36.0352
rs79024610	T	C	T	C	-0.1473	-0.2214	0.5275	0.6747	MICA	1.94e-09	0.024538	TRUE	36.0352
rs79024610	T	C	T	C	-0.1473	-0.2214	0.5275	0.6747	MICA	1.94e-09	0.024538	TRUE	36.0352
rs79024610	T	C	T	C	-0.1473	-0.2214	0.5275	0.6747	MICA	1.94e-09	0.024538	TRUE	36.0352
rs6693520	A	G	A	G	-0.0471	0.0348	0.0814	0.6693	CACNA2D3	1.03e-08	0.008226	TRUE	32.7842
rs6693520	A	G	A	G	-0.0471	0.0348	0.0814	0.6693	CACNA2D3	1.03e-08	0.008226	TRUE	32.7842
rs6693520	A	G	A	G	-0.0471	0.0348	0.0814	0.6693	CACNA2D3	1.03e-08	0.008226	TRUE	32.7842
rs6693520	A	G	A	G	-0.0471	0.0348	0.0814	0.6693	CACNA2D3	1.03e-08	0.008226	TRUE	32.7842
rs6693520	A	G	A	G	-0.0471	0.0348	0.0814	0.6693	CACNA2D3	1.03e-08	0.008226	TRUE	32.7842
rs34946699	A	G	A	G	-0.0657	-0.0569	0.1325	0.667799	TMPRSS11D	5.59e-10	0.010594	TRUE	38.4601
rs34946699	A	G	A	G	-0.0657	-0.0569	0.1325	0.667799	TMPRSS11D	5.59e-10	0.010594	TRUE	38.4601
rs34946699	A	G	A	G	-0.0657	-0.0569	0.1325	0.667799	TMPRSS11D	5.59e-10	0.010594	TRUE	38.4601
rs34946699	A	G	A	G	-0.0657	-0.0569	0.1325	0.667799	TMPRSS11D	5.59e-10	0.010594	TRUE	38.4601
rs34946699	A	G	A	G	-0.0657	-0.0569	0.1325	0.667799	TMPRSS11D	5.59e-10	0.010594	TRUE	38.4601
rs193147530	C	T	C	T	-0.1876	0.2457	0.5696	0.6663	HP	1.08e-09	0.030768	TRUE	37.1764
rs193147530	C	T	C	T	-0.1876	0.2457	0.5696	0.6663	HP	1.08e-09	0.030768	TRUE	37.1764
rs193147530	C	T	C	T	-0.1876	0.2457	0.5696	0.6663	HP	1.08e-09	0.030768	TRUE	37.1764
rs193147530	C	T	C	T	-0.1876	0.2457	0.5696	0.6663	HP	1.08e-09	0.030768	TRUE	37.1764
rs193147530	C	T	C	T	-0.1876	0.2457	0.5696	0.6663	HP	1.08e-09	0.030768	TRUE	37.1764
rs114289390	T	C	T	C	-0.1995	0.112	0.2595	0.666099	SH3BGRL3	2.63e-22	0.020538	TRUE	94.356
rs114289390	T	C	T	C	-0.1995	0.112	0.2595	0.666099	SH3BGRL3	2.63e-22	0.020538	TRUE	94.356
rs114289390	T	C	T	C	-0.1995	0.112	0.2595	0.666099	SH3BGRL3	2.63e-22	0.020538	TRUE	94.356
rs114289390	T	C	T	C	-0.1995	0.112	0.2595	0.666099	SH3BGRL3	2.63e-22	0.020538	TRUE	94.356
rs114289390	T	C	T	C	-0.1995	0.112	0.2595	0.666099	SH3BGRL3	2.63e-22	0.020538	TRUE	94.356
rs12376204	T	C	T	C	0.275	0.1419	0.3277	0.6651	TEX29	1.42e-09	0.045429	TRUE	36.6437
rs12376204	T	C	T	C	0.275	0.1419	0.3277	0.6651	TEX29	1.42e-09	0.045429	TRUE	36.6437
rs12376204	T	C	T	C	0.275	0.1419	0.3277	0.6651	TEX29	1.42e-09	0.045429	TRUE	36.6437
rs12376204	T	C	T	C	0.275	0.1419	0.3277	0.6651	TEX29	1.42e-09	0.045429	TRUE	36.6437
rs12376204	T	C	T	C	0.275	0.1419	0.3277	0.6651	TEX29	1.42e-09	0.045429	TRUE	36.6437
rs11158602	G	T	G	T	-0.0663	-0.0353	0.0816	0.6648	CACNA2D3	3.18e-16	0.008119	TRUE	66.6841
rs11158602	G	T	G	T	-0.0663	-0.0353	0.0816	0.6648	CACNA2D3	3.18e-16	0.008119	TRUE	66.6841
rs11158602	G	T	G	T	-0.0663	-0.0353	0.0816	0.6648	CACNA2D3	3.18e-16	0.008119	TRUE	66.6841
rs11158602	G	T	G	T	-0.0663	-0.0353	0.0816	0.6648	CACNA2D3	3.18e-16	0.008119	TRUE	66.6841
rs11158602	G	T	G	T	-0.0663	-0.0353	0.0816	0.6648	CACNA2D3	3.18e-16	0.008119	TRUE	66.6841
rs75855189	A	G	A	G	-0.1623	0.1439	0.3312	0.663901	NPTX1	2.9e-11	0.0244	TRUE	44.2443
rs75855189	A	G	A	G	-0.1623	0.1439	0.3312	0.663901	NPTX1	2.9e-11	0.0244	TRUE	44.2443
rs75855189	A	G	A	G	-0.1623	0.1439	0.3312	0.663901	NPTX1	2.9e-11	0.0244	TRUE	44.2443
rs75855189	A	G	A	G	-0.1623	0.1439	0.3312	0.663901	NPTX1	2.9e-11	0.0244	TRUE	44.2443
rs75855189	A	G	A	G	-0.1623	0.1439	0.3312	0.663901	NPTX1	2.9e-11	0.0244	TRUE	44.2443
rs72708125	C	T	C	T	0.1011	-0.1081	0.2482	0.6633	DCP1B	2.47e-08	0.018134	TRUE	31.0824
rs72708125	C	T	C	T	0.1011	-0.1081	0.2482	0.6633	DCP1B	2.47e-08	0.018134	TRUE	31.0824
rs72708125	C	T	C	T	0.1011	-0.1081	0.2482	0.6633	DCP1B	2.47e-08	0.018134	TRUE	31.0824
rs72708125	C	T	C	T	0.1011	-0.1081	0.2482	0.6633	DCP1B	2.47e-08	0.018134	TRUE	31.0824
rs72708125	C	T	C	T	0.1011	-0.1081	0.2482	0.6633	DCP1B	2.47e-08	0.018134	TRUE	31.0824
rs72817385	A	T	A	T	-0.2865	-0.1939	0.437	0.657201	SERPINF1	6.15e-18	0.033199	TRUE	74.4731
rs72817385	A	T	A	T	-0.2865	-0.1939	0.437	0.657201	SERPINF1	6.15e-18	0.033199	TRUE	74.4731
rs72817385	A	T	A	T	-0.2865	-0.1939	0.437	0.657201	SERPINF1	6.15e-18	0.033199	TRUE	74.4731
rs72817385	A	T	A	T	-0.2865	-0.1939	0.437	0.657201	SERPINF1	6.15e-18	0.033199	TRUE	74.4731
rs72817385	A	T	A	T	-0.2865	-0.1939	0.437	0.657201	SERPINF1	6.15e-18	0.033199	TRUE	74.4731
rs9875630	T	G	T	G	0.1099	0.0372	0.0837	0.6565	NCAN	1.29e-36	0.008695	TRUE	159.756
rs9875630	T	G	T	G	0.1099	0.0372	0.0837	0.6565	NCAN	1.29e-36	0.008695	TRUE	159.756
rs9875630	T	G	T	G	0.1099	0.0372	0.0837	0.6565	NCAN	1.29e-36	0.008695	TRUE	159.756
rs9875630	T	G	T	G	0.1099	0.0372	0.0837	0.6565	NCAN	1.29e-36	0.008695	TRUE	159.756
rs9875630	T	G	T	G	0.1099	0.0372	0.0837	0.6565	NCAN	1.29e-36	0.008695	TRUE	159.756
rs189902748	A	C	A	C	0.245	0.1239	0.2785	0.656401	ING4	6.48e-32	0.020838	TRUE	138.236
rs189902748	A	C	A	C	0.245	0.1239	0.2785	0.656401	ING4	6.48e-32	0.020838	TRUE	138.236
rs189902748	A	C	A	C	0.245	0.1239	0.2785	0.656401	ING4	6.48e-32	0.020838	TRUE	138.236
rs189902748	A	C	A	C	0.245	0.1239	0.2785	0.656401	ING4	6.48e-32	0.020838	TRUE	138.236
rs189902748	A	C	A	C	0.245	0.1239	0.2785	0.656401	ING4	6.48e-32	0.020838	TRUE	138.236
rs189902748	A	C	A	C	0.2612	0.1239	0.2785	0.656401	PHGDH	5.31e-34	0.021487	TRUE	147.773
rs189902748	A	C	A	C	0.2612	0.1239	0.2785	0.656401	PHGDH	5.31e-34	0.021487	TRUE	147.773
rs189902748	A	C	A	C	0.2612	0.1239	0.2785	0.656401	PHGDH	5.31e-34	0.021487	TRUE	147.773
rs189902748	A	C	A	C	0.2612	0.1239	0.2785	0.656401	PHGDH	5.31e-34	0.021487	TRUE	147.773
rs189902748	A	C	A	C	0.2612	0.1239	0.2785	0.656401	PHGDH	5.31e-34	0.021487	TRUE	147.773
rs189902748	A	C	A	C	0.2978	0.1239	0.2785	0.656401	VPS29	9.76e-43	0.021733	TRUE	187.763
rs189902748	A	C	A	C	0.2978	0.1239	0.2785	0.656401	VPS29	9.76e-43	0.021733	TRUE	187.763
rs189902748	A	C	A	C	0.2978	0.1239	0.2785	0.656401	VPS29	9.76e-43	0.021733	TRUE	187.763
rs189902748	A	C	A	C	0.2978	0.1239	0.2785	0.656401	VPS29	9.76e-43	0.021733	TRUE	187.763
rs189902748	A	C	A	C	0.2978	0.1239	0.2785	0.656401	VPS29	9.76e-43	0.021733	TRUE	187.763
rs117771294	G	A	G	A	0.1981	-0.1697	0.3803	0.655399	LGALS3BP	3.22e-19	0.022107	TRUE	80.2989
rs117771294	G	A	G	A	0.1981	-0.1697	0.3803	0.655399	LGALS3BP	3.22e-19	0.022107	TRUE	80.2989
rs117771294	G	A	G	A	0.1981	-0.1697	0.3803	0.655399	LGALS3BP	3.22e-19	0.022107	TRUE	80.2989
rs117771294	G	A	G	A	0.1981	-0.1697	0.3803	0.655399	LGALS3BP	3.22e-19	0.022107	TRUE	80.2989
rs117771294	G	A	G	A	0.1981	-0.1697	0.3803	0.655399	LGALS3BP	3.22e-19	0.022107	TRUE	80.2989
rs150132874	G	A	G	A	-0.2351	-0.3005	0.6693	0.653501	PSMB4	5.06e-10	0.037815	TRUE	38.6525
rs150132874	G	A	G	A	-0.2351	-0.3005	0.6693	0.653501	PSMB4	5.06e-10	0.037815	TRUE	38.6525
rs150132874	G	A	G	A	-0.2351	-0.3005	0.6693	0.653501	PSMB4	5.06e-10	0.037815	TRUE	38.6525
rs150132874	G	A	G	A	-0.2351	-0.3005	0.6693	0.653501	PSMB4	5.06e-10	0.037815	TRUE	38.6525
rs150132874	G	A	G	A	-0.2351	-0.3005	0.6693	0.653501	PSMB4	5.06e-10	0.037815	TRUE	38.6525
rs1033847	C	T	C	T	0.1155	-0.0865	0.1917	0.6517	MREG	6.47e-10	0.018694	TRUE	38.1733
rs1033847	C	T	C	T	0.1155	-0.0865	0.1917	0.6517	MREG	6.47e-10	0.018694	TRUE	38.1733
rs1033847	C	T	C	T	0.1155	-0.0865	0.1917	0.6517	MREG	6.47e-10	0.018694	TRUE	38.1733
rs1033847	C	T	C	T	0.1155	-0.0865	0.1917	0.6517	MREG	6.47e-10	0.018694	TRUE	38.1733
rs1033847	C	T	C	T	0.1155	-0.0865	0.1917	0.6517	MREG	6.47e-10	0.018694	TRUE	38.1733
rs183833760	A	T	A	T	0.1603	-0.1269	0.2785	0.6487	NPTX1	5.49e-09	0.027488	TRUE	34.008
rs183833760	A	T	A	T	0.1603	-0.1269	0.2785	0.6487	NPTX1	5.49e-09	0.027488	TRUE	34.008
rs183833760	A	T	A	T	0.1603	-0.1269	0.2785	0.6487	NPTX1	5.49e-09	0.027488	TRUE	34.008
rs183833760	A	T	A	T	0.1603	-0.1269	0.2785	0.6487	NPTX1	5.49e-09	0.027488	TRUE	34.008
rs183833760	A	T	A	T	0.1603	-0.1269	0.2785	0.6487	NPTX1	5.49e-09	0.027488	TRUE	34.008
rs1535692	A	G	A	G	-0.0662	0.0421	0.0915	0.645601	GPC6	4.94e-12	0.009584	TRUE	47.7114
rs1535692	A	G	A	G	-0.0662	0.0421	0.0915	0.645601	GPC6	4.94e-12	0.009584	TRUE	47.7114
rs1535692	A	G	A	G	-0.0662	0.0421	0.0915	0.645601	GPC6	4.94e-12	0.009584	TRUE	47.7114
rs1535692	A	G	A	G	-0.0662	0.0421	0.0915	0.645601	GPC6	4.94e-12	0.009584	TRUE	47.7114
rs1535692	A	G	A	G	-0.0662	0.0421	0.0915	0.645601	GPC6	4.94e-12	0.009584	TRUE	47.7114
rs9534312	C	T	C	T	0.1497	0.0387	0.0839	0.6445	TDO2	6.6e-67	0.008663	TRUE	298.612
rs9534312	C	T	C	T	0.1497	0.0387	0.0839	0.6445	TDO2	6.6e-67	0.008663	TRUE	298.612
rs9534312	C	T	C	T	0.1497	0.0387	0.0839	0.6445	TDO2	6.6e-67	0.008663	TRUE	298.612
rs9534312	C	T	C	T	0.1497	0.0387	0.0839	0.6445	TDO2	6.6e-67	0.008663	TRUE	298.612
rs9534312	C	T	C	T	0.1497	0.0387	0.0839	0.6445	TDO2	6.6e-67	0.008663	TRUE	298.612
rs28419310	G	T	G	T	0.2187	-0.0903	0.1933	0.640301	NPFF	2.22e-22	0.022474	TRUE	94.6971
rs28419310	G	T	G	T	0.2187	-0.0903	0.1933	0.640301	NPFF	2.22e-22	0.022474	TRUE	94.6971
rs28419310	G	T	G	T	0.2187	-0.0903	0.1933	0.640301	NPFF	2.22e-22	0.022474	TRUE	94.6971
rs28419310	G	T	G	T	0.2187	-0.0903	0.1933	0.640301	NPFF	2.22e-22	0.022474	TRUE	94.6971
rs28419310	G	T	G	T	0.2187	-0.0903	0.1933	0.640301	NPFF	2.22e-22	0.022474	TRUE	94.6971
rs150380552	C	T	C	T	-0.2586	-0.2206	0.4671	0.6367	MICA	4.48e-13	0.035716	TRUE	52.4242
rs150380552	C	T	C	T	-0.2586	-0.2206	0.4671	0.6367	MICA	4.48e-13	0.035716	TRUE	52.4242
rs150380552	C	T	C	T	-0.2586	-0.2206	0.4671	0.6367	MICA	4.48e-13	0.035716	TRUE	52.4242
rs150380552	C	T	C	T	-0.2586	-0.2206	0.4671	0.6367	MICA	4.48e-13	0.035716	TRUE	52.4242
rs150380552	C	T	C	T	-0.2586	-0.2206	0.4671	0.6367	MICA	4.48e-13	0.035716	TRUE	52.4242
rs10832218	C	T	C	T	-0.0502	0.0404	0.0854	0.6363	CALCB	5.06e-10	0.008074	TRUE	38.6572
rs10832218	C	T	C	T	-0.0502	0.0404	0.0854	0.6363	CALCB	5.06e-10	0.008074	TRUE	38.6572
rs10832218	C	T	C	T	-0.0502	0.0404	0.0854	0.6363	CALCB	5.06e-10	0.008074	TRUE	38.6572
rs10832218	C	T	C	T	-0.0502	0.0404	0.0854	0.6363	CALCB	5.06e-10	0.008074	TRUE	38.6572
rs10832218	C	T	C	T	-0.0502	0.0404	0.0854	0.6363	CALCB	5.06e-10	0.008074	TRUE	38.6572
rs12085435	A	G	A	G	0.2608	-0.1081	0.2225	0.6271	TEX29	4.79e-46	0.018308	TRUE	202.924
rs12085435	A	G	A	G	0.2608	-0.1081	0.2225	0.6271	TEX29	4.79e-46	0.018308	TRUE	202.924
rs12085435	A	G	A	G	0.2608	-0.1081	0.2225	0.6271	TEX29	4.79e-46	0.018308	TRUE	202.924
rs12085435	A	G	A	G	0.2608	-0.1081	0.2225	0.6271	TEX29	4.79e-46	0.018308	TRUE	202.924
rs12085435	A	G	A	G	0.2608	-0.1081	0.2225	0.6271	TEX29	4.79e-46	0.018308	TRUE	202.924
rs56886956	T	C	T	C	0.0579	-0.0501	0.1022	0.6243	NPTX1	3.78e-09	0.009825	TRUE	34.729
rs56886956	T	C	T	C	0.0579	-0.0501	0.1022	0.6243	NPTX1	3.78e-09	0.009825	TRUE	34.729
rs56886956	T	C	T	C	0.0579	-0.0501	0.1022	0.6243	NPTX1	3.78e-09	0.009825	TRUE	34.729
rs56886956	T	C	T	C	0.0579	-0.0501	0.1022	0.6243	NPTX1	3.78e-09	0.009825	TRUE	34.729
rs56886956	T	C	T	C	0.0579	-0.0501	0.1022	0.6243	NPTX1	3.78e-09	0.009825	TRUE	34.729
rs9840584	C	T	C	T	0.1882	-0.258	0.5256	0.623499	CACNA2D3	8.62e-17	0.022614	TRUE	69.2603
rs9840584	C	T	C	T	0.1882	-0.258	0.5256	0.623499	CACNA2D3	8.62e-17	0.022614	TRUE	69.2603
rs9840584	C	T	C	T	0.1882	-0.258	0.5256	0.623499	CACNA2D3	8.62e-17	0.022614	TRUE	69.2603
rs9840584	C	T	C	T	0.1882	-0.258	0.5256	0.623499	CACNA2D3	8.62e-17	0.022614	TRUE	69.2603
rs9840584	C	T	C	T	0.1882	-0.258	0.5256	0.623499	CACNA2D3	8.62e-17	0.022614	TRUE	69.2603
rs979597	C	T	C	T	0.1426	-0.1724	0.3473	0.6195	PTGR1	1.55e-10	0.02228	TRUE	40.9646
rs979597	C	T	C	T	0.1426	-0.1724	0.3473	0.6195	PTGR1	1.55e-10	0.02228	TRUE	40.9646
rs979597	C	T	C	T	0.1426	-0.1724	0.3473	0.6195	PTGR1	1.55e-10	0.02228	TRUE	40.9646
rs979597	C	T	C	T	0.1426	-0.1724	0.3473	0.6195	PTGR1	1.55e-10	0.02228	TRUE	40.9646
rs979597	C	T	C	T	0.1426	-0.1724	0.3473	0.6195	PTGR1	1.55e-10	0.02228	TRUE	40.9646
rs139890439	C	A	C	A	0.1905	0.255	0.5101	0.6172	PHGDH	2.03e-18	0.021757	TRUE	76.6641
rs139890439	C	A	C	A	0.1905	0.255	0.5101	0.6172	PHGDH	2.03e-18	0.021757	TRUE	76.6641
rs139890439	C	A	C	A	0.1905	0.255	0.5101	0.6172	PHGDH	2.03e-18	0.021757	TRUE	76.6641
rs139890439	C	A	C	A	0.1905	0.255	0.5101	0.6172	PHGDH	2.03e-18	0.021757	TRUE	76.6641
rs139890439	C	A	C	A	0.1905	0.255	0.5101	0.6172	PHGDH	2.03e-18	0.021757	TRUE	76.6641
rs1801701	T	C	T	C	0.0733	0.0767	0.1535	0.617101	SRXN1	3.84e-10	0.011708	TRUE	39.1961
rs1801701	T	C	T	C	0.0733	0.0767	0.1535	0.617101	SRXN1	3.84e-10	0.011708	TRUE	39.1961
rs1801701	T	C	T	C	0.0733	0.0767	0.1535	0.617101	SRXN1	3.84e-10	0.011708	TRUE	39.1961
rs1801701	T	C	T	C	0.0733	0.0767	0.1535	0.617101	SRXN1	3.84e-10	0.011708	TRUE	39.1961
rs1801701	T	C	T	C	0.0733	0.0767	0.1535	0.617101	SRXN1	3.84e-10	0.011708	TRUE	39.1961
rs117183891	A	G	A	G	0.2384	0.1612	0.3206	0.615	PHGDH	3.37e-17	0.02827	TRUE	71.1149
rs117183891	A	G	A	G	0.2384	0.1612	0.3206	0.615	PHGDH	3.37e-17	0.02827	TRUE	71.1149
rs117183891	A	G	A	G	0.2384	0.1612	0.3206	0.615	PHGDH	3.37e-17	0.02827	TRUE	71.1149
rs117183891	A	G	A	G	0.2384	0.1612	0.3206	0.615	PHGDH	3.37e-17	0.02827	TRUE	71.1149
rs117183891	A	G	A	G	0.2384	0.1612	0.3206	0.615	PHGDH	3.37e-17	0.02827	TRUE	71.1149
rs1653769	A	G	A	G	0.0589	0.0491	0.0975	0.6145	POMGNT2	3.39e-08	0.01067	TRUE	30.4721
rs1653769	A	G	A	G	0.0589	0.0491	0.0975	0.6145	POMGNT2	3.39e-08	0.01067	TRUE	30.4721
rs1653769	A	G	A	G	0.0589	0.0491	0.0975	0.6145	POMGNT2	3.39e-08	0.01067	TRUE	30.4721
rs1653769	A	G	A	G	0.0589	0.0491	0.0975	0.6145	POMGNT2	3.39e-08	0.01067	TRUE	30.4721
rs1653769	A	G	A	G	0.0589	0.0491	0.0975	0.6145	POMGNT2	3.39e-08	0.01067	TRUE	30.4721
rs146809058	T	C	T	C	1.1087	-0.3426	0.6714	0.609901	MICB	0	0.019261	TRUE	3313.37
rs146809058	T	C	T	C	1.1087	-0.3426	0.6714	0.609901	MICB	0	0.019261	TRUE	3313.37
rs146809058	T	C	T	C	1.1087	-0.3426	0.6714	0.609901	MICB	0	0.019261	TRUE	3313.37
rs146809058	T	C	T	C	1.1087	-0.3426	0.6714	0.609901	MICB	0	0.019261	TRUE	3313.37
rs146809058	T	C	T	C	1.1087	-0.3426	0.6714	0.609901	MICB	0	0.019261	TRUE	3313.37
rs6925652	C	T	C	T	0.0922	0.0451	0.085	0.595701	GFRAL	8.88e-29	0.008283	TRUE	123.904
rs6925652	C	T	C	T	0.0922	0.0451	0.085	0.595701	GFRAL	8.88e-29	0.008283	TRUE	123.904
rs6925652	C	T	C	T	0.0922	0.0451	0.085	0.595701	GFRAL	8.88e-29	0.008283	TRUE	123.904
rs6925652	C	T	C	T	0.0922	0.0451	0.085	0.595701	GFRAL	8.88e-29	0.008283	TRUE	123.904
rs6925652	C	T	C	T	0.0922	0.0451	0.085	0.595701	GFRAL	8.88e-29	0.008283	TRUE	123.904
rs880108	A	C	A	C	-0.0881	-0.0592	0.1111	0.593999	VPS29	1.23e-12	0.012404	TRUE	50.4462
rs880108	A	C	A	C	-0.0881	-0.0592	0.1111	0.593999	VPS29	1.23e-12	0.012404	TRUE	50.4462
rs880108	A	C	A	C	-0.0881	-0.0592	0.1111	0.593999	VPS29	1.23e-12	0.012404	TRUE	50.4462
rs880108	A	C	A	C	-0.0881	-0.0592	0.1111	0.593999	VPS29	1.23e-12	0.012404	TRUE	50.4462
rs880108	A	C	A	C	-0.0881	-0.0592	0.1111	0.593999	VPS29	1.23e-12	0.012404	TRUE	50.4462
rs55983154	T	C	T	C	0.3734	-0.2443	0.456	0.592199	ING4	1.18e-22	0.03812	TRUE	95.9495
rs55983154	T	C	T	C	0.3734	-0.2443	0.456	0.592199	ING4	1.18e-22	0.03812	TRUE	95.9495
rs55983154	T	C	T	C	0.3734	-0.2443	0.456	0.592199	ING4	1.18e-22	0.03812	TRUE	95.9495
rs55983154	T	C	T	C	0.3734	-0.2443	0.456	0.592199	ING4	1.18e-22	0.03812	TRUE	95.9495
rs55983154	T	C	T	C	0.3734	-0.2443	0.456	0.592199	ING4	1.18e-22	0.03812	TRUE	95.9495
rs111406374	A	G	A	G	-0.1817	0.1411	0.2626	0.5909	NCAN	4.52e-12	0.026258	TRUE	47.8836
rs111406374	A	G	A	G	-0.1817	0.1411	0.2626	0.5909	NCAN	4.52e-12	0.026258	TRUE	47.8836
rs111406374	A	G	A	G	-0.1817	0.1411	0.2626	0.5909	NCAN	4.52e-12	0.026258	TRUE	47.8836
rs111406374	A	G	A	G	-0.1817	0.1411	0.2626	0.5909	NCAN	4.52e-12	0.026258	TRUE	47.8836
rs111406374	A	G	A	G	-0.1817	0.1411	0.2626	0.5909	NCAN	4.52e-12	0.026258	TRUE	47.8836
rs146259350	A	G	A	G	0.2351	0.1868	0.3433	0.5863	PGP	2.84e-11	0.035328	TRUE	44.2861
rs146259350	A	G	A	G	0.2351	0.1868	0.3433	0.5863	PGP	2.84e-11	0.035328	TRUE	44.2861
rs146259350	A	G	A	G	0.2351	0.1868	0.3433	0.5863	PGP	2.84e-11	0.035328	TRUE	44.2861
rs146259350	A	G	A	G	0.2351	0.1868	0.3433	0.5863	PGP	2.84e-11	0.035328	TRUE	44.2861
rs146259350	A	G	A	G	0.2351	0.1868	0.3433	0.5863	PGP	2.84e-11	0.035328	TRUE	44.2861
rs140092737	G	A	G	A	0.3307	-0.3235	0.5916	0.584501	HP	1.35e-14	0.042944	TRUE	59.3012
rs140092737	G	A	G	A	0.3307	-0.3235	0.5916	0.584501	HP	1.35e-14	0.042944	TRUE	59.3012
rs140092737	G	A	G	A	0.3307	-0.3235	0.5916	0.584501	HP	1.35e-14	0.042944	TRUE	59.3012
rs140092737	G	A	G	A	0.3307	-0.3235	0.5916	0.584501	HP	1.35e-14	0.042944	TRUE	59.3012
rs140092737	G	A	G	A	0.3307	-0.3235	0.5916	0.584501	HP	1.35e-14	0.042944	TRUE	59.3012
rs116946917	A	G	A	G	0.1733	0.1142	0.2088	0.584501	NPTX1	8.58e-27	0.016172	TRUE	114.834
rs116946917	A	G	A	G	0.1733	0.1142	0.2088	0.584501	NPTX1	8.58e-27	0.016172	TRUE	114.834
rs116946917	A	G	A	G	0.1733	0.1142	0.2088	0.584501	NPTX1	8.58e-27	0.016172	TRUE	114.834
rs116946917	A	G	A	G	0.1733	0.1142	0.2088	0.584501	NPTX1	8.58e-27	0.016172	TRUE	114.834
rs116946917	A	G	A	G	0.1733	0.1142	0.2088	0.584501	NPTX1	8.58e-27	0.016172	TRUE	114.834
rs7831768	T	C	T	C	0.3702	0.1081	0.1943	0.578	LGALS3BP	2.67e-93	0.018068	TRUE	419.81
rs7831768	T	C	T	C	0.3702	0.1081	0.1943	0.578	LGALS3BP	2.67e-93	0.018068	TRUE	419.81
rs7831768	T	C	T	C	0.3702	0.1081	0.1943	0.578	LGALS3BP	2.67e-93	0.018068	TRUE	419.81
rs7831768	T	C	T	C	0.3702	0.1081	0.1943	0.578	LGALS3BP	2.67e-93	0.018068	TRUE	419.81
rs7831768	T	C	T	C	0.3702	0.1081	0.1943	0.578	LGALS3BP	2.67e-93	0.018068	TRUE	419.81
rs200461156	A	G	A	G	0.0731	0.0501	0.0894	0.5752	MYOC	9.42e-13	0.01024	TRUE	50.9606
rs200461156	A	G	A	G	0.0731	0.0501	0.0894	0.5752	MYOC	9.42e-13	0.01024	TRUE	50.9606
rs200461156	A	G	A	G	0.0731	0.0501	0.0894	0.5752	MYOC	9.42e-13	0.01024	TRUE	50.9606
rs200461156	A	G	A	G	0.0731	0.0501	0.0894	0.5752	MYOC	9.42e-13	0.01024	TRUE	50.9606
rs200461156	A	G	A	G	0.0731	0.0501	0.0894	0.5752	MYOC	9.42e-13	0.01024	TRUE	50.9606
rs138799654	A	G	A	G	-0.1777	-0.1022	0.1813	0.5729	TDO2	2.36e-13	0.024253	TRUE	53.6839
rs138799654	A	G	A	G	-0.1777	-0.1022	0.1813	0.5729	TDO2	2.36e-13	0.024253	TRUE	53.6839
rs138799654	A	G	A	G	-0.1777	-0.1022	0.1813	0.5729	TDO2	2.36e-13	0.024253	TRUE	53.6839
rs138799654	A	G	A	G	-0.1777	-0.1022	0.1813	0.5729	TDO2	2.36e-13	0.024253	TRUE	53.6839
rs138799654	A	G	A	G	-0.1777	-0.1022	0.1813	0.5729	TDO2	2.36e-13	0.024253	TRUE	53.6839
rs141829518	A	G	A	G	-0.2413	-0.1189	0.2099	0.571	PSMB4	1.38e-26	0.022612	TRUE	113.877
rs141829518	A	G	A	G	-0.2413	-0.1189	0.2099	0.571	PSMB4	1.38e-26	0.022612	TRUE	113.877
rs141829518	A	G	A	G	-0.2413	-0.1189	0.2099	0.571	PSMB4	1.38e-26	0.022612	TRUE	113.877
rs141829518	A	G	A	G	-0.2413	-0.1189	0.2099	0.571	PSMB4	1.38e-26	0.022612	TRUE	113.877
rs141829518	A	G	A	G	-0.2413	-0.1189	0.2099	0.571	PSMB4	1.38e-26	0.022612	TRUE	113.877
rs60111444	G	A	G	A	0.0699	-0.0581	0.1023	0.5702	NCAN	1.37e-13	0.009446	TRUE	54.7594
rs60111444	G	A	G	A	0.0699	-0.0581	0.1023	0.5702	NCAN	1.37e-13	0.009446	TRUE	54.7594
rs60111444	G	A	G	A	0.0699	-0.0581	0.1023	0.5702	NCAN	1.37e-13	0.009446	TRUE	54.7594
rs60111444	G	A	G	A	0.0699	-0.0581	0.1023	0.5702	NCAN	1.37e-13	0.009446	TRUE	54.7594
rs60111444	G	A	G	A	0.0699	-0.0581	0.1023	0.5702	NCAN	1.37e-13	0.009446	TRUE	54.7594
rs12986034	A	G	A	G	0.0548	0.0596	0.1023	0.5597	HP	1.28e-10	0.008523	TRUE	41.3405
rs12986034	A	G	A	G	0.0548	0.0596	0.1023	0.5597	HP	1.28e-10	0.008523	TRUE	41.3405
rs12986034	A	G	A	G	0.0548	0.0596	0.1023	0.5597	HP	1.28e-10	0.008523	TRUE	41.3405
rs12986034	A	G	A	G	0.0548	0.0596	0.1023	0.5597	HP	1.28e-10	0.008523	TRUE	41.3405
rs12986034	A	G	A	G	0.0548	0.0596	0.1023	0.5597	HP	1.28e-10	0.008523	TRUE	41.3405
rs549449	T	G	T	G	-0.5351	-1.0505	1.7967	0.558799	SELP	1.22e-09	0.088043	TRUE	36.9386
rs549449	T	G	T	G	-0.5351	-1.0505	1.7967	0.558799	SELP	1.22e-09	0.088043	TRUE	36.9386
rs549449	T	G	T	G	-0.5351	-1.0505	1.7967	0.558799	SELP	1.22e-09	0.088043	TRUE	36.9386
rs549449	T	G	T	G	-0.5351	-1.0505	1.7967	0.558799	SELP	1.22e-09	0.088043	TRUE	36.9386
rs549449	T	G	T	G	-0.5351	-1.0505	1.7967	0.558799	SELP	1.22e-09	0.088043	TRUE	36.9386
rs11039297	A	G	A	G	0.0708	0.0571	0.0965	0.554201	C1QTNF5	1.1e-13	0.009531	TRUE	55.181
rs11039297	A	G	A	G	0.0708	0.0571	0.0965	0.554201	C1QTNF5	1.1e-13	0.009531	TRUE	55.181
rs11039297	A	G	A	G	0.0708	0.0571	0.0965	0.554201	C1QTNF5	1.1e-13	0.009531	TRUE	55.181
rs11039297	A	G	A	G	0.0708	0.0571	0.0965	0.554201	C1QTNF5	1.1e-13	0.009531	TRUE	55.181
rs11039297	A	G	A	G	0.0708	0.0571	0.0965	0.554201	C1QTNF5	1.1e-13	0.009531	TRUE	55.181
rs3740688	T	G	T	G	0.0611	-0.0563	0.0926	0.5434	LGALS3BP	3.07e-13	0.00838	TRUE	53.1612
rs3740688	T	G	T	G	0.0611	-0.0563	0.0926	0.5434	LGALS3BP	3.07e-13	0.00838	TRUE	53.1612
rs3740688	T	G	T	G	0.0611	-0.0563	0.0926	0.5434	LGALS3BP	3.07e-13	0.00838	TRUE	53.1612
rs3740688	T	G	T	G	0.0611	-0.0563	0.0926	0.5434	LGALS3BP	3.07e-13	0.00838	TRUE	53.1612
rs3740688	T	G	T	G	0.0611	-0.0563	0.0926	0.5434	LGALS3BP	3.07e-13	0.00838	TRUE	53.1612
rs1362076	T	G	T	G	-0.4253	0.4273	0.6922	0.5371	APOM	4.27e-26	0.04025	TRUE	111.65
rs1362076	T	G	T	G	-0.4253	0.4273	0.6922	0.5371	APOM	4.27e-26	0.04025	TRUE	111.65
rs1362076	T	G	T	G	-0.4253	0.4273	0.6922	0.5371	APOM	4.27e-26	0.04025	TRUE	111.65
rs1362076	T	G	T	G	-0.4253	0.4273	0.6922	0.5371	APOM	4.27e-26	0.04025	TRUE	111.65
rs1362076	T	G	T	G	-0.4253	0.4273	0.6922	0.5371	APOM	4.27e-26	0.04025	TRUE	111.65
rs142109116	T	C	T	C	0.3559	-0.3641	0.5836	0.5327	NPTX1	2.07e-28	0.032193	TRUE	122.217
rs142109116	T	C	T	C	0.3559	-0.3641	0.5836	0.5327	NPTX1	2.07e-28	0.032193	TRUE	122.217
rs142109116	T	C	T	C	0.3559	-0.3641	0.5836	0.5327	NPTX1	2.07e-28	0.032193	TRUE	122.217
rs142109116	T	C	T	C	0.3559	-0.3641	0.5836	0.5327	NPTX1	2.07e-28	0.032193	TRUE	122.217
rs142109116	T	C	T	C	0.3559	-0.3641	0.5836	0.5327	NPTX1	2.07e-28	0.032193	TRUE	122.217
rs3752785	T	C	T	C	-0.1881	0.0548	0.0873	0.5302	HP	7.71e-100	0.008868	TRUE	449.911
rs3752785	T	C	T	C	-0.1881	0.0548	0.0873	0.5302	HP	7.71e-100	0.008868	TRUE	449.911
rs3752785	T	C	T	C	-0.1881	0.0548	0.0873	0.5302	HP	7.71e-100	0.008868	TRUE	449.911
rs3752785	T	C	T	C	-0.1881	0.0548	0.0873	0.5302	HP	7.71e-100	0.008868	TRUE	449.911
rs3752785	T	C	T	C	-0.1881	0.0548	0.0873	0.5302	HP	7.71e-100	0.008868	TRUE	449.911
rs145312664	A	G	A	G	0.1841	0.2074	0.3284	0.5277	EPHB6	1.08e-10	0.028517	TRUE	41.6773
rs145312664	A	G	A	G	0.1841	0.2074	0.3284	0.5277	EPHB6	1.08e-10	0.028517	TRUE	41.6773
rs145312664	A	G	A	G	0.1841	0.2074	0.3284	0.5277	EPHB6	1.08e-10	0.028517	TRUE	41.6773
rs145312664	A	G	A	G	0.1841	0.2074	0.3284	0.5277	EPHB6	1.08e-10	0.028517	TRUE	41.6773
rs145312664	A	G	A	G	0.1841	0.2074	0.3284	0.5277	EPHB6	1.08e-10	0.028517	TRUE	41.6773
rs143501783	C	T	C	T	0.2266	0.6146	0.9269	0.5073	ADGRE2	3.36e-09	0.038321	TRUE	34.966
rs143501783	C	T	C	T	0.2266	0.6146	0.9269	0.5073	ADGRE2	3.36e-09	0.038321	TRUE	34.966
rs143501783	C	T	C	T	0.2266	0.6146	0.9269	0.5073	ADGRE2	3.36e-09	0.038321	TRUE	34.966
rs143501783	C	T	C	T	0.2266	0.6146	0.9269	0.5073	ADGRE2	3.36e-09	0.038321	TRUE	34.966
rs143501783	C	T	C	T	0.2266	0.6146	0.9269	0.5073	ADGRE2	3.36e-09	0.038321	TRUE	34.966
rs148198842	A	G	A	G	0.1251	-0.2418	0.3629	0.5053	NPTX1	4.26e-08	0.02283	TRUE	30.0264
rs148198842	A	G	A	G	0.1251	-0.2418	0.3629	0.5053	NPTX1	4.26e-08	0.02283	TRUE	30.0264
rs148198842	A	G	A	G	0.1251	-0.2418	0.3629	0.5053	NPTX1	4.26e-08	0.02283	TRUE	30.0264
rs148198842	A	G	A	G	0.1251	-0.2418	0.3629	0.5053	NPTX1	4.26e-08	0.02283	TRUE	30.0264
rs148198842	A	G	A	G	0.1251	-0.2418	0.3629	0.5053	NPTX1	4.26e-08	0.02283	TRUE	30.0264
rs17253026	C	T	C	T	-0.1868	-0.0948	0.1406	0.5	NID2	7.36e-37	0.014729	TRUE	160.845
rs17253026	C	T	C	T	-0.1868	-0.0948	0.1406	0.5	NID2	7.36e-37	0.014729	TRUE	160.845
rs17253026	C	T	C	T	-0.1868	-0.0948	0.1406	0.5	NID2	7.36e-37	0.014729	TRUE	160.845
rs17253026	C	T	C	T	-0.1868	-0.0948	0.1406	0.5	NID2	7.36e-37	0.014729	TRUE	160.845
rs17253026	C	T	C	T	-0.1868	-0.0948	0.1406	0.5	NID2	7.36e-37	0.014729	TRUE	160.845
rs7778938	C	T	C	T	-0.0751	0.0599	0.0884	0.4979	HSPG2	9.59e-18	0.008754	TRUE	73.5981
rs7778938	C	T	C	T	-0.0751	0.0599	0.0884	0.4979	HSPG2	9.59e-18	0.008754	TRUE	73.5981
rs7778938	C	T	C	T	-0.0751	0.0599	0.0884	0.4979	HSPG2	9.59e-18	0.008754	TRUE	73.5981
rs7778938	C	T	C	T	-0.0751	0.0599	0.0884	0.4979	HSPG2	9.59e-18	0.008754	TRUE	73.5981
rs7778938	C	T	C	T	-0.0751	0.0599	0.0884	0.4979	HSPG2	9.59e-18	0.008754	TRUE	73.5981
rs1891058	A	G	A	G	0.0782	-0.0604	0.0886	0.4953	NPTX1	5.03e-20	0.008534	TRUE	83.9669
rs1891058	A	G	A	G	0.0782	-0.0604	0.0886	0.4953	NPTX1	5.03e-20	0.008534	TRUE	83.9669
rs1891058	A	G	A	G	0.0782	-0.0604	0.0886	0.4953	NPTX1	5.03e-20	0.008534	TRUE	83.9669
rs1891058	A	G	A	G	0.0782	-0.0604	0.0886	0.4953	NPTX1	5.03e-20	0.008534	TRUE	83.9669
rs1891058	A	G	A	G	0.0782	-0.0604	0.0886	0.4953	NPTX1	5.03e-20	0.008534	TRUE	83.9669
rs10822155	A	C	A	C	0.066	-0.0581	0.0837	0.4879	NID2	2.29e-16	0.008043	TRUE	67.3367
rs10822155	A	C	A	C	0.066	-0.0581	0.0837	0.4879	NID2	2.29e-16	0.008043	TRUE	67.3367
rs10822155	A	C	A	C	0.066	-0.0581	0.0837	0.4879	NID2	2.29e-16	0.008043	TRUE	67.3367
rs10822155	A	C	A	C	0.066	-0.0581	0.0837	0.4879	NID2	2.29e-16	0.008043	TRUE	67.3367
rs10822155	A	C	A	C	0.066	-0.0581	0.0837	0.4879	NID2	2.29e-16	0.008043	TRUE	67.3367
rs150394939	C	T	C	T	0.1825	-0.2289	0.3299	0.4877	NID2	1.1e-12	0.025643	TRUE	50.651
rs150394939	C	T	C	T	0.1825	-0.2289	0.3299	0.4877	NID2	1.1e-12	0.025643	TRUE	50.651
rs150394939	C	T	C	T	0.1825	-0.2289	0.3299	0.4877	NID2	1.1e-12	0.025643	TRUE	50.651
rs150394939	C	T	C	T	0.1825	-0.2289	0.3299	0.4877	NID2	1.1e-12	0.025643	TRUE	50.651
rs150394939	C	T	C	T	0.1825	-0.2289	0.3299	0.4877	NID2	1.1e-12	0.025643	TRUE	50.651
rs117453529	A	G	A	G	0.3081	-0.5107	0.7334	0.4861	BMP6	6.99e-14	0.041146	TRUE	56.0697
rs117453529	A	G	A	G	0.3081	-0.5107	0.7334	0.4861	BMP6	6.99e-14	0.041146	TRUE	56.0697
rs117453529	A	G	A	G	0.3081	-0.5107	0.7334	0.4861	BMP6	6.99e-14	0.041146	TRUE	56.0697
rs117453529	A	G	A	G	0.3081	-0.5107	0.7334	0.4861	BMP6	6.99e-14	0.041146	TRUE	56.0697
rs117453529	A	G	A	G	0.3081	-0.5107	0.7334	0.4861	BMP6	6.99e-14	0.041146	TRUE	56.0697
rs78264306	G	T	G	T	0.2573	-0.2882	0.4136	0.4859	ING4	3.69e-14	0.033982	TRUE	57.33
rs78264306	G	T	G	T	0.2573	-0.2882	0.4136	0.4859	ING4	3.69e-14	0.033982	TRUE	57.33
rs78264306	G	T	G	T	0.2573	-0.2882	0.4136	0.4859	ING4	3.69e-14	0.033982	TRUE	57.33
rs78264306	G	T	G	T	0.2573	-0.2882	0.4136	0.4859	ING4	3.69e-14	0.033982	TRUE	57.33
rs78264306	G	T	G	T	0.2573	-0.2882	0.4136	0.4859	ING4	3.69e-14	0.033982	TRUE	57.33
rs7541	T	C	T	C	-0.0643	0.0802	0.1143	0.4827	PSMB4	2.36e-09	0.010769	TRUE	35.651
rs7541	T	C	T	C	-0.0643	0.0802	0.1143	0.4827	PSMB4	2.36e-09	0.010769	TRUE	35.651
rs7541	T	C	T	C	-0.0643	0.0802	0.1143	0.4827	PSMB4	2.36e-09	0.010769	TRUE	35.651
rs7541	T	C	T	C	-0.0643	0.0802	0.1143	0.4827	PSMB4	2.36e-09	0.010769	TRUE	35.651
rs7541	T	C	T	C	-0.0643	0.0802	0.1143	0.4827	PSMB4	2.36e-09	0.010769	TRUE	35.651
rs111486799	A	G	A	G	-0.0916	-0.0702	0.0989	0.4781	SH3BGRL3	2.3e-20	0.009905	TRUE	85.5228
rs111486799	A	G	A	G	-0.0916	-0.0702	0.0989	0.4781	SH3BGRL3	2.3e-20	0.009905	TRUE	85.5228
rs111486799	A	G	A	G	-0.0916	-0.0702	0.0989	0.4781	SH3BGRL3	2.3e-20	0.009905	TRUE	85.5228
rs111486799	A	G	A	G	-0.0916	-0.0702	0.0989	0.4781	SH3BGRL3	2.3e-20	0.009905	TRUE	85.5228
rs111486799	A	G	A	G	-0.0916	-0.0702	0.0989	0.4781	SH3BGRL3	2.3e-20	0.009905	TRUE	85.5228
rs3120137	A	G	A	G	-0.1016	-0.0872	0.1228	0.4775	MREG	1.63e-17	0.011928	TRUE	72.5525
rs3120137	A	G	A	G	-0.1016	-0.0872	0.1228	0.4775	MREG	1.63e-17	0.011928	TRUE	72.5525
rs3120137	A	G	A	G	-0.1016	-0.0872	0.1228	0.4775	MREG	1.63e-17	0.011928	TRUE	72.5525
rs3120137	A	G	A	G	-0.1016	-0.0872	0.1228	0.4775	MREG	1.63e-17	0.011928	TRUE	72.5525
rs3120137	A	G	A	G	-0.1016	-0.0872	0.1228	0.4775	MREG	1.63e-17	0.011928	TRUE	72.5525
rs11244084	T	C	T	C	-0.0964	0.1349	0.1878	0.4726	POMGNT2	7.59e-09	0.016686	TRUE	33.3772
rs11244084	T	C	T	C	-0.0964	0.1349	0.1878	0.4726	POMGNT2	7.59e-09	0.016686	TRUE	33.3772
rs11244084	T	C	T	C	-0.0964	0.1349	0.1878	0.4726	POMGNT2	7.59e-09	0.016686	TRUE	33.3772
rs11244084	T	C	T	C	-0.0964	0.1349	0.1878	0.4726	POMGNT2	7.59e-09	0.016686	TRUE	33.3772
rs11244084	T	C	T	C	-0.0964	0.1349	0.1878	0.4726	POMGNT2	7.59e-09	0.016686	TRUE	33.3772
rs75666474	A	G	A	G	0.1693	0.3459	0.4792	0.4703	SPINK6	4.39e-22	0.017523	TRUE	93.3463
rs75666474	A	G	A	G	0.1693	0.3459	0.4792	0.4703	SPINK6	4.39e-22	0.017523	TRUE	93.3463
rs75666474	A	G	A	G	0.1693	0.3459	0.4792	0.4703	SPINK6	4.39e-22	0.017523	TRUE	93.3463
rs75666474	A	G	A	G	0.1693	0.3459	0.4792	0.4703	SPINK6	4.39e-22	0.017523	TRUE	93.3463
rs75666474	A	G	A	G	0.1693	0.3459	0.4792	0.4703	SPINK6	4.39e-22	0.017523	TRUE	93.3463
rs35959442	G	C	G	C	0.0699	0.0626	0.0857	0.4649	SCUBE3	4.28e-15	0.008909	TRUE	61.5597
rs35959442	G	C	G	C	0.0699	0.0626	0.0857	0.4649	SCUBE3	4.28e-15	0.008909	TRUE	61.5597
rs35959442	G	C	G	C	0.0699	0.0626	0.0857	0.4649	SCUBE3	4.28e-15	0.008909	TRUE	61.5597
rs35959442	G	C	G	C	0.0699	0.0626	0.0857	0.4649	SCUBE3	4.28e-15	0.008909	TRUE	61.5597
rs35959442	G	C	G	C	0.0699	0.0626	0.0857	0.4649	SCUBE3	4.28e-15	0.008909	TRUE	61.5597
rs73216598	C	G	C	G	0.2167	0.2746	0.3755	0.4645	CD96	7.51e-14	0.028976	TRUE	55.9295
rs73216598	C	G	C	G	0.2167	0.2746	0.3755	0.4645	CD96	7.51e-14	0.028976	TRUE	55.9295
rs73216598	C	G	C	G	0.2167	0.2746	0.3755	0.4645	CD96	7.51e-14	0.028976	TRUE	55.9295
rs73216598	C	G	C	G	0.2167	0.2746	0.3755	0.4645	CD96	7.51e-14	0.028976	TRUE	55.9295
rs73216598	C	G	C	G	0.2167	0.2746	0.3755	0.4645	CD96	7.51e-14	0.028976	TRUE	55.9295
rs73216598	C	G	C	G	0.2163	0.2746	0.3755	0.4645	ERMAP	7.53e-14	0.028924	TRUE	55.9238
rs73216598	C	G	C	G	0.2163	0.2746	0.3755	0.4645	ERMAP	7.53e-14	0.028924	TRUE	55.9238
rs73216598	C	G	C	G	0.2163	0.2746	0.3755	0.4645	ERMAP	7.53e-14	0.028924	TRUE	55.9238
rs73216598	C	G	C	G	0.2163	0.2746	0.3755	0.4645	ERMAP	7.53e-14	0.028924	TRUE	55.9238
rs73216598	C	G	C	G	0.2163	0.2746	0.3755	0.4645	ERMAP	7.53e-14	0.028924	TRUE	55.9238
rs73216598	C	G	C	G	0.2614	0.2746	0.3755	0.4645	NHLRC3	3.46e-19	0.029197	TRUE	80.1558
rs73216598	C	G	C	G	0.2614	0.2746	0.3755	0.4645	NHLRC3	3.46e-19	0.029197	TRUE	80.1558
rs73216598	C	G	C	G	0.2614	0.2746	0.3755	0.4645	NHLRC3	3.46e-19	0.029197	TRUE	80.1558
rs73216598	C	G	C	G	0.2614	0.2746	0.3755	0.4645	NHLRC3	3.46e-19	0.029197	TRUE	80.1558
rs73216598	C	G	C	G	0.2614	0.2746	0.3755	0.4645	NHLRC3	3.46e-19	0.029197	TRUE	80.1558
rs73216598	C	G	C	G	0.3059	0.2746	0.3755	0.4645	SRXN1	4.84e-26	0.028983	TRUE	111.397
rs73216598	C	G	C	G	0.3059	0.2746	0.3755	0.4645	SRXN1	4.84e-26	0.028983	TRUE	111.397
rs73216598	C	G	C	G	0.3059	0.2746	0.3755	0.4645	SRXN1	4.84e-26	0.028983	TRUE	111.397
rs73216598	C	G	C	G	0.3059	0.2746	0.3755	0.4645	SRXN1	4.84e-26	0.028983	TRUE	111.397
rs73216598	C	G	C	G	0.3059	0.2746	0.3755	0.4645	SRXN1	4.84e-26	0.028983	TRUE	111.397
rs55821276	T	C	T	C	0.1642	-1.0447	1.4106	0.4589	DCP1B	1.91e-56	0.010372	TRUE	250.623
rs55821276	T	C	T	C	0.1642	-1.0447	1.4106	0.4589	DCP1B	1.91e-56	0.010372	TRUE	250.623
rs55821276	T	C	T	C	0.1642	-1.0447	1.4106	0.4589	DCP1B	1.91e-56	0.010372	TRUE	250.623
rs55821276	T	C	T	C	0.1642	-1.0447	1.4106	0.4589	DCP1B	1.91e-56	0.010372	TRUE	250.623
rs55821276	T	C	T	C	0.1642	-1.0447	1.4106	0.4589	DCP1B	1.91e-56	0.010372	TRUE	250.623
rs2644383	G	A	G	A	-0.0501	0.0611	0.0814	0.4523	APOM	1.71e-09	0.008318	TRUE	36.2775
rs2644383	G	A	G	A	-0.0501	0.0611	0.0814	0.4523	APOM	1.71e-09	0.008318	TRUE	36.2775
rs2644383	G	A	G	A	-0.0501	0.0611	0.0814	0.4523	APOM	1.71e-09	0.008318	TRUE	36.2775
rs2644383	G	A	G	A	-0.0501	0.0611	0.0814	0.4523	APOM	1.71e-09	0.008318	TRUE	36.2775
rs2644383	G	A	G	A	-0.0501	0.0611	0.0814	0.4523	APOM	1.71e-09	0.008318	TRUE	36.2775
rs114400615	T	C	T	C	-0.2679	0.3137	0.4165	0.4514	SPINK6	6.5e-10	0.043364	TRUE	38.1669
rs114400615	T	C	T	C	-0.2679	0.3137	0.4165	0.4514	SPINK6	6.5e-10	0.043364	TRUE	38.1669
rs114400615	T	C	T	C	-0.2679	0.3137	0.4165	0.4514	SPINK6	6.5e-10	0.043364	TRUE	38.1669
rs114400615	T	C	T	C	-0.2679	0.3137	0.4165	0.4514	SPINK6	6.5e-10	0.043364	TRUE	38.1669
rs114400615	T	C	T	C	-0.2679	0.3137	0.4165	0.4514	SPINK6	6.5e-10	0.043364	TRUE	38.1669
rs62133140	C	T	C	T	0.112	0.0626	0.0821	0.4453	LILRA5	1.51e-39	0.008511	TRUE	173.171
rs62133140	C	T	C	T	0.112	0.0626	0.0821	0.4453	LILRA5	1.51e-39	0.008511	TRUE	173.171
rs62133140	C	T	C	T	0.112	0.0626	0.0821	0.4453	LILRA5	1.51e-39	0.008511	TRUE	173.171
rs62133140	C	T	C	T	0.112	0.0626	0.0821	0.4453	LILRA5	1.51e-39	0.008511	TRUE	173.171
rs62133140	C	T	C	T	0.112	0.0626	0.0821	0.4453	LILRA5	1.51e-39	0.008511	TRUE	173.171
rs78342082	T	C	T	C	0.1714	0.1536	0.2011	0.4448	EPHB6	3.04e-13	0.023503	TRUE	53.1833
rs78342082	T	C	T	C	0.1714	0.1536	0.2011	0.4448	EPHB6	3.04e-13	0.023503	TRUE	53.1833
rs78342082	T	C	T	C	0.1714	0.1536	0.2011	0.4448	EPHB6	3.04e-13	0.023503	TRUE	53.1833
rs78342082	T	C	T	C	0.1714	0.1536	0.2011	0.4448	EPHB6	3.04e-13	0.023503	TRUE	53.1833
rs78342082	T	C	T	C	0.1714	0.1536	0.2011	0.4448	EPHB6	3.04e-13	0.023503	TRUE	53.1833
rs1709003	T	C	T	C	0.0494	0.0626	0.0814	0.4419	SSU72	9.42e-10	0.008073	TRUE	37.4442
rs1709003	T	C	T	C	0.0494	0.0626	0.0814	0.4419	SSU72	9.42e-10	0.008073	TRUE	37.4442
rs1709003	T	C	T	C	0.0494	0.0626	0.0814	0.4419	SSU72	9.42e-10	0.008073	TRUE	37.4442
rs1709003	T	C	T	C	0.0494	0.0626	0.0814	0.4419	SSU72	9.42e-10	0.008073	TRUE	37.4442
rs1709003	T	C	T	C	0.0494	0.0626	0.0814	0.4419	SSU72	9.42e-10	0.008073	TRUE	37.4442
rs9930063	C	T	C	T	-0.0464	0.0629	0.0816	0.4407	HP	1.95e-08	0.008261	TRUE	31.5479
rs9930063	C	T	C	T	-0.0489	0.0629	0.0816	0.4407	HP	3.5e-09	0.008279	TRUE	34.8869
rs9930063	C	T	C	T	-0.0464	0.0629	0.0816	0.4407	HP	1.95e-08	0.008261	TRUE	31.5479
rs9930063	C	T	C	T	-0.0489	0.0629	0.0816	0.4407	HP	3.5e-09	0.008279	TRUE	34.8869
rs9930063	C	T	C	T	-0.0464	0.0629	0.0816	0.4407	HP	1.95e-08	0.008261	TRUE	31.5479
rs9930063	C	T	C	T	-0.0489	0.0629	0.0816	0.4407	HP	3.5e-09	0.008279	TRUE	34.8869
rs9930063	C	T	C	T	-0.0464	0.0629	0.0816	0.4407	HP	1.95e-08	0.008261	TRUE	31.5479
rs9930063	C	T	C	T	-0.0489	0.0629	0.0816	0.4407	HP	3.5e-09	0.008279	TRUE	34.8869
rs9930063	C	T	C	T	-0.0464	0.0629	0.0816	0.4407	HP	1.95e-08	0.008261	TRUE	31.5479
rs9930063	C	T	C	T	-0.0489	0.0629	0.0816	0.4407	HP	3.5e-09	0.008279	TRUE	34.8869
rs78111684	A	G	A	G	0.255	-0.297	0.3817	0.4365	DCP1B	6.82e-13	0.0355	TRUE	51.5969
rs78111684	A	G	A	G	0.255	-0.297	0.3817	0.4365	DCP1B	6.82e-13	0.0355	TRUE	51.5969
rs78111684	A	G	A	G	0.255	-0.297	0.3817	0.4365	DCP1B	6.82e-13	0.0355	TRUE	51.5969
rs78111684	A	G	A	G	0.255	-0.297	0.3817	0.4365	DCP1B	6.82e-13	0.0355	TRUE	51.5969
rs78111684	A	G	A	G	0.255	-0.297	0.3817	0.4365	DCP1B	6.82e-13	0.0355	TRUE	51.5969
rs6561262	A	G	A	G	0.0895	0.0711	0.0913	0.4364	MREG	5.76e-23	0.00907	TRUE	97.3714
rs6561262	A	G	A	G	0.0895	0.0711	0.0913	0.4364	MREG	5.76e-23	0.00907	TRUE	97.3714
rs6561262	A	G	A	G	0.0895	0.0711	0.0913	0.4364	MREG	5.76e-23	0.00907	TRUE	97.3714
rs6561262	A	G	A	G	0.0895	0.0711	0.0913	0.4364	MREG	5.76e-23	0.00907	TRUE	97.3714
rs6561262	A	G	A	G	0.0895	0.0711	0.0913	0.4364	MREG	5.76e-23	0.00907	TRUE	97.3714
rs116911825	T	C	T	C	0.1123	0.2072	0.2658	0.4356	TDO2	3.24e-08	0.020314	TRUE	30.5611
rs116911825	T	C	T	C	0.1123	0.2072	0.2658	0.4356	TDO2	3.24e-08	0.020314	TRUE	30.5611
rs116911825	T	C	T	C	0.1123	0.2072	0.2658	0.4356	TDO2	3.24e-08	0.020314	TRUE	30.5611
rs116911825	T	C	T	C	0.1123	0.2072	0.2658	0.4356	TDO2	3.24e-08	0.020314	TRUE	30.5611
rs116911825	T	C	T	C	0.1123	0.2072	0.2658	0.4356	TDO2	3.24e-08	0.020314	TRUE	30.5611
rs149181595	C	A	C	A	0.1592	0.4387	0.5592	0.4327	POMGNT2	7.9e-13	0.022226	TRUE	51.3055
rs149181595	C	A	C	A	0.1592	0.4387	0.5592	0.4327	POMGNT2	7.9e-13	0.022226	TRUE	51.3055
rs149181595	C	A	C	A	0.1592	0.4387	0.5592	0.4327	POMGNT2	7.9e-13	0.022226	TRUE	51.3055
rs149181595	C	A	C	A	0.1592	0.4387	0.5592	0.4327	POMGNT2	7.9e-13	0.022226	TRUE	51.3055
rs149181595	C	A	C	A	0.1592	0.4387	0.5592	0.4327	POMGNT2	7.9e-13	0.022226	TRUE	51.3055
rs143350267	G	A	G	A	0.1579	-0.219	0.2771	0.4292	GFRAL	4.69e-08	0.028905	TRUE	29.8413
rs143350267	G	A	G	A	0.1579	-0.219	0.2771	0.4292	GFRAL	4.69e-08	0.028905	TRUE	29.8413
rs143350267	G	A	G	A	0.1579	-0.219	0.2771	0.4292	GFRAL	4.69e-08	0.028905	TRUE	29.8413
rs143350267	G	A	G	A	0.1579	-0.219	0.2771	0.4292	GFRAL	4.69e-08	0.028905	TRUE	29.8413
rs143350267	G	A	G	A	0.1579	-0.219	0.2771	0.4292	GFRAL	4.69e-08	0.028905	TRUE	29.8413
rs145730801	C	T	C	T	0.4439	0.5371	0.6769	0.4275	GPC6	1.9e-72	0.024659	TRUE	324.055
rs145730801	C	T	C	T	0.4439	0.5371	0.6769	0.4275	GPC6	1.9e-72	0.024659	TRUE	324.055
rs145730801	C	T	C	T	0.4439	0.5371	0.6769	0.4275	GPC6	1.9e-72	0.024659	TRUE	324.055
rs145730801	C	T	C	T	0.4439	0.5371	0.6769	0.4275	GPC6	1.9e-72	0.024659	TRUE	324.055
rs145730801	C	T	C	T	0.4439	0.5371	0.6769	0.4275	GPC6	1.9e-72	0.024659	TRUE	324.055
rs10506806	T	C	T	C	-0.0492	0.0742	0.0933	0.426	PAWR	4.43e-09	0.008386	TRUE	34.4208
rs10506806	T	C	T	C	-0.0492	0.0742	0.0933	0.426	PAWR	4.43e-09	0.008386	TRUE	34.4208
rs10506806	T	C	T	C	-0.0492	0.0742	0.0933	0.426	PAWR	4.43e-09	0.008386	TRUE	34.4208
rs10506806	T	C	T	C	-0.0492	0.0742	0.0933	0.426	PAWR	4.43e-09	0.008386	TRUE	34.4208
rs10506806	T	C	T	C	-0.0492	0.0742	0.0933	0.426	PAWR	4.43e-09	0.008386	TRUE	34.4208
rs75129807	A	G	A	G	0.1838	-0.136	0.1686	0.4197	DLX4	9.88e-38	0.014315	TRUE	164.857
rs75129807	A	G	A	G	0.1838	-0.136	0.1686	0.4197	DLX4	9.88e-38	0.014315	TRUE	164.857
rs75129807	A	G	A	G	0.1838	-0.136	0.1686	0.4197	DLX4	9.88e-38	0.014315	TRUE	164.857
rs75129807	A	G	A	G	0.1838	-0.136	0.1686	0.4197	DLX4	9.88e-38	0.014315	TRUE	164.857
rs75129807	A	G	A	G	0.1838	-0.136	0.1686	0.4197	DLX4	9.88e-38	0.014315	TRUE	164.857
rs58676655	C	T	C	T	-0.2751	0.2111	0.2594	0.4156	GSTM3	2.03e-31	0.023592	TRUE	135.973
rs58676655	C	T	C	T	-0.2751	0.2111	0.2594	0.4156	GSTM3	2.03e-31	0.023592	TRUE	135.973
rs58676655	C	T	C	T	-0.2751	0.2111	0.2594	0.4156	GSTM3	2.03e-31	0.023592	TRUE	135.973
rs58676655	C	T	C	T	-0.2751	0.2111	0.2594	0.4156	GSTM3	2.03e-31	0.023592	TRUE	135.973
rs58676655	C	T	C	T	-0.2751	0.2111	0.2594	0.4156	GSTM3	2.03e-31	0.023592	TRUE	135.973
rs568305378	A	T	A	T	0.0608	-0.0806	0.0987	0.4143	ADGRE2	2.11e-10	0.00957	TRUE	40.363
rs568305378	A	T	A	T	0.0608	-0.0806	0.0987	0.4143	ADGRE2	2.11e-10	0.00957	TRUE	40.363
rs568305378	A	T	A	T	0.0608	-0.0806	0.0987	0.4143	ADGRE2	2.11e-10	0.00957	TRUE	40.363
rs568305378	A	T	A	T	0.0608	-0.0806	0.0987	0.4143	ADGRE2	2.11e-10	0.00957	TRUE	40.363
rs568305378	A	T	A	T	0.0608	-0.0806	0.0987	0.4143	ADGRE2	2.11e-10	0.00957	TRUE	40.363
rs150641600	T	C	T	C	0.287	-0.1753	0.2109	0.406	MMP1	1.14e-27	0.026329	TRUE	118.822
rs150641600	T	C	T	C	0.287	-0.1753	0.2109	0.406	MMP1	1.14e-27	0.026329	TRUE	118.822
rs150641600	T	C	T	C	0.287	-0.1753	0.2109	0.406	MMP1	1.14e-27	0.026329	TRUE	118.822
rs150641600	T	C	T	C	0.287	-0.1753	0.2109	0.406	MMP1	1.14e-27	0.026329	TRUE	118.822
rs150641600	T	C	T	C	0.287	-0.1753	0.2109	0.406	MMP1	1.14e-27	0.026329	TRUE	118.822
rs117046431	A	G	A	G	-0.5033	-1.1296	1.3551	0.4045	NID2	1.29e-28	0.045353	TRUE	123.152
rs117046431	A	G	A	G	-0.5033	-1.1296	1.3551	0.4045	NID2	1.29e-28	0.045353	TRUE	123.152
rs117046431	A	G	A	G	-0.5033	-1.1296	1.3551	0.4045	NID2	1.29e-28	0.045353	TRUE	123.152
rs117046431	A	G	A	G	-0.5033	-1.1296	1.3551	0.4045	NID2	1.29e-28	0.045353	TRUE	123.152
rs117046431	A	G	A	G	-0.5033	-1.1296	1.3551	0.4045	NID2	1.29e-28	0.045353	TRUE	123.152
rs664034	T	C	T	C	-0.0602	-0.0693	0.083	0.4042	LGALS3BP	1.33e-12	0.008489	TRUE	50.2898
rs664034	T	C	T	C	-0.0602	-0.0693	0.083	0.4042	LGALS3BP	1.33e-12	0.008489	TRUE	50.2898
rs664034	T	C	T	C	-0.0602	-0.0693	0.083	0.4042	LGALS3BP	1.33e-12	0.008489	TRUE	50.2898
rs664034	T	C	T	C	-0.0602	-0.0693	0.083	0.4042	LGALS3BP	1.33e-12	0.008489	TRUE	50.2898
rs664034	T	C	T	C	-0.0602	-0.0693	0.083	0.4042	LGALS3BP	1.33e-12	0.008489	TRUE	50.2898
rs111526614	T	C	T	C	-0.3983	-0.3952	0.4697	0.4001	LGALS3BP	2.12e-27	0.036729	TRUE	117.599
rs111526614	T	C	T	C	-0.3983	-0.3952	0.4697	0.4001	LGALS3BP	2.12e-27	0.036729	TRUE	117.599
rs111526614	T	C	T	C	-0.3983	-0.3952	0.4697	0.4001	LGALS3BP	2.12e-27	0.036729	TRUE	117.599
rs111526614	T	C	T	C	-0.3983	-0.3952	0.4697	0.4001	LGALS3BP	2.12e-27	0.036729	TRUE	117.599
rs111526614	T	C	T	C	-0.3983	-0.3952	0.4697	0.4001	LGALS3BP	2.12e-27	0.036729	TRUE	117.599
rs2234197	A	G	A	G	-0.1524	-0.0849	0.1007	0.3992	DHRS9	1.24e-48	0.010399	TRUE	214.777
rs2234197	A	G	A	G	-0.1524	-0.0849	0.1007	0.3992	DHRS9	1.24e-48	0.010399	TRUE	214.777
rs2234197	A	G	A	G	-0.1524	-0.0849	0.1007	0.3992	DHRS9	1.24e-48	0.010399	TRUE	214.777
rs2234197	A	G	A	G	-0.1524	-0.0849	0.1007	0.3992	DHRS9	1.24e-48	0.010399	TRUE	214.777
rs2234197	A	G	A	G	-0.1524	-0.0849	0.1007	0.3992	DHRS9	1.24e-48	0.010399	TRUE	214.777
rs2686395	C	T	C	T	-0.0576	0.0805	0.095	0.3964	BIRC2	1.99e-10	0.009054	TRUE	40.4729
rs2686395	C	T	C	T	-0.0576	0.0805	0.095	0.3964	BIRC2	1.99e-10	0.009054	TRUE	40.4729
rs2686395	C	T	C	T	-0.0576	0.0805	0.095	0.3964	BIRC2	1.99e-10	0.009054	TRUE	40.4729
rs2686395	C	T	C	T	-0.0576	0.0805	0.095	0.3964	BIRC2	1.99e-10	0.009054	TRUE	40.4729
rs2686395	C	T	C	T	-0.0576	0.0805	0.095	0.3964	BIRC2	1.99e-10	0.009054	TRUE	40.4729
rs2686395	C	T	C	T	-0.069	0.0805	0.095	0.3964	VPS29	1.3e-13	0.009316	TRUE	54.8579
rs2686395	C	T	C	T	-0.069	0.0805	0.095	0.3964	VPS29	1.3e-13	0.009316	TRUE	54.8579
rs2686395	C	T	C	T	-0.069	0.0805	0.095	0.3964	VPS29	1.3e-13	0.009316	TRUE	54.8579
rs2686395	C	T	C	T	-0.069	0.0805	0.095	0.3964	VPS29	1.3e-13	0.009316	TRUE	54.8579
rs2686395	C	T	C	T	-0.069	0.0805	0.095	0.3964	VPS29	1.3e-13	0.009316	TRUE	54.8579
rs11105305	T	C	T	C	0.0529	0.0851	0.1001	0.3953	TDO2	2.21e-08	0.009455	TRUE	31.3032
rs11105305	T	C	T	C	0.0529	0.0851	0.1001	0.3953	TDO2	2.21e-08	0.009455	TRUE	31.3032
rs11105305	T	C	T	C	0.0529	0.0851	0.1001	0.3953	TDO2	2.21e-08	0.009455	TRUE	31.3032
rs11105305	T	C	T	C	0.0529	0.0851	0.1001	0.3953	TDO2	2.21e-08	0.009455	TRUE	31.3032
rs11105305	T	C	T	C	0.0529	0.0851	0.1001	0.3953	TDO2	2.21e-08	0.009455	TRUE	31.3032
rs74673621	T	C	T	C	-0.3015	0.1627	0.1905	0.3931	SERPINF1	8.48e-13	0.042149	TRUE	51.1682
rs74673621	T	C	T	C	-0.3015	0.1627	0.1905	0.3931	SERPINF1	8.48e-13	0.042149	TRUE	51.1682
rs74673621	T	C	T	C	-0.3015	0.1627	0.1905	0.3931	SERPINF1	8.48e-13	0.042149	TRUE	51.1682
rs74673621	T	C	T	C	-0.3015	0.1627	0.1905	0.3931	SERPINF1	8.48e-13	0.042149	TRUE	51.1682
rs74673621	T	C	T	C	-0.3015	0.1627	0.1905	0.3931	SERPINF1	8.48e-13	0.042149	TRUE	51.1682
rs10935480	T	C	T	C	-0.0899	0.0699	0.0819	0.393	MICB	4.87e-33	0.007508	TRUE	143.374
rs10935480	T	C	T	C	-0.0899	0.0699	0.0819	0.393	MICB	4.87e-33	0.007508	TRUE	143.374
rs10935480	T	C	T	C	-0.0899	0.0699	0.0819	0.393	MICB	4.87e-33	0.007508	TRUE	143.374
rs10935480	T	C	T	C	-0.0899	0.0699	0.0819	0.393	MICB	4.87e-33	0.007508	TRUE	143.374
rs10935480	T	C	T	C	-0.0899	0.0699	0.0819	0.393	MICB	4.87e-33	0.007508	TRUE	143.374
rs117981338	T	C	T	C	0.2733	0.262	0.306	0.3919	C1QTNF5	2.33e-28	0.024745	TRUE	121.984
rs117981338	T	C	T	C	0.2733	0.262	0.306	0.3919	C1QTNF5	2.33e-28	0.024745	TRUE	121.984
rs117981338	T	C	T	C	0.2733	0.262	0.306	0.3919	C1QTNF5	2.33e-28	0.024745	TRUE	121.984
rs117981338	T	C	T	C	0.2733	0.262	0.306	0.3919	C1QTNF5	2.33e-28	0.024745	TRUE	121.984
rs117981338	T	C	T	C	0.2733	0.262	0.306	0.3919	C1QTNF5	2.33e-28	0.024745	TRUE	121.984
rs184657202	A	G	A	G	0.7862	-0.4693	0.5412	0.3858	VPS29	5.08e-39	0.060166	TRUE	170.751
rs184657202	A	G	A	G	0.7862	-0.4693	0.5412	0.3858	VPS29	5.08e-39	0.060166	TRUE	170.751
rs184657202	A	G	A	G	0.7862	-0.4693	0.5412	0.3858	VPS29	5.08e-39	0.060166	TRUE	170.751
rs184657202	A	G	A	G	0.7862	-0.4693	0.5412	0.3858	VPS29	5.08e-39	0.060166	TRUE	170.751
rs184657202	A	G	A	G	0.7862	-0.4693	0.5412	0.3858	VPS29	5.08e-39	0.060166	TRUE	170.751
rs77291082	G	A	G	A	0.148	0.3703	0.4261	0.3848	MICA	2.93e-08	0.026687	TRUE	30.7556
rs77291082	G	A	G	A	0.148	0.3703	0.4261	0.3848	MICA	2.93e-08	0.026687	TRUE	30.7556
rs77291082	G	A	G	A	0.148	0.3703	0.4261	0.3848	MICA	2.93e-08	0.026687	TRUE	30.7556
rs77291082	G	A	G	A	0.148	0.3703	0.4261	0.3848	MICA	2.93e-08	0.026687	TRUE	30.7556
rs77291082	G	A	G	A	0.148	0.3703	0.4261	0.3848	MICA	2.93e-08	0.026687	TRUE	30.7556
rs145877563	C	T	C	T	0.4333	1.3348	1.5334	0.384	MICB	4.27e-33	0.036154	TRUE	143.636
rs145877563	C	T	C	T	0.4333	1.3348	1.5334	0.384	MICB	4.27e-33	0.036154	TRUE	143.636
rs145877563	C	T	C	T	0.4333	1.3348	1.5334	0.384	MICB	4.27e-33	0.036154	TRUE	143.636
rs145877563	C	T	C	T	0.4333	1.3348	1.5334	0.384	MICB	4.27e-33	0.036154	TRUE	143.636
rs145877563	C	T	C	T	0.4333	1.3348	1.5334	0.384	MICB	4.27e-33	0.036154	TRUE	143.636
rs62066151	G	T	G	T	-0.0647	-0.0904	0.1038	0.3839	CYB5D2	1.38e-09	0.010679	TRUE	36.7069
rs62066151	G	T	G	T	-0.0647	-0.0904	0.1038	0.3839	CYB5D2	1.38e-09	0.010679	TRUE	36.7069
rs62066151	G	T	G	T	-0.0647	-0.0904	0.1038	0.3839	CYB5D2	1.38e-09	0.010679	TRUE	36.7069
rs62066151	G	T	G	T	-0.0647	-0.0904	0.1038	0.3839	CYB5D2	1.38e-09	0.010679	TRUE	36.7069
rs62066151	G	T	G	T	-0.0647	-0.0904	0.1038	0.3839	CYB5D2	1.38e-09	0.010679	TRUE	36.7069
rs7468080	G	A	G	A	0.0836	0.0749	0.0857	0.3819	SCUBE3	2.44e-17	0.009869	TRUE	71.7573
rs7468080	G	A	G	A	0.0836	0.0749	0.0857	0.3819	SCUBE3	2.44e-17	0.009869	TRUE	71.7573
rs7468080	G	A	G	A	0.0836	0.0749	0.0857	0.3819	SCUBE3	2.44e-17	0.009869	TRUE	71.7573
rs7468080	G	A	G	A	0.0836	0.0749	0.0857	0.3819	SCUBE3	2.44e-17	0.009869	TRUE	71.7573
rs7468080	G	A	G	A	0.0836	0.0749	0.0857	0.3819	SCUBE3	2.44e-17	0.009869	TRUE	71.7573
rs1707652	T	C	T	C	0.0566	-0.0828	0.0946	0.3814	APOM	1.5e-10	0.008837	TRUE	41.0226
rs1707652	T	C	T	C	0.0566	-0.0828	0.0946	0.3814	APOM	1.5e-10	0.008837	TRUE	41.0226
rs1707652	T	C	T	C	0.0566	-0.0828	0.0946	0.3814	APOM	1.5e-10	0.008837	TRUE	41.0226
rs1707652	T	C	T	C	0.0566	-0.0828	0.0946	0.3814	APOM	1.5e-10	0.008837	TRUE	41.0226
rs1707652	T	C	T	C	0.0566	-0.0828	0.0946	0.3814	APOM	1.5e-10	0.008837	TRUE	41.0226
rs1707652	T	C	T	C	0.1001	-0.0828	0.0946	0.3814	C5orf38	1.43e-27	0.0092	TRUE	118.384
rs1707652	T	C	T	C	0.1001	-0.0828	0.0946	0.3814	C5orf38	1.43e-27	0.0092	TRUE	118.384
rs1707652	T	C	T	C	0.1001	-0.0828	0.0946	0.3814	C5orf38	1.43e-27	0.0092	TRUE	118.384
rs1707652	T	C	T	C	0.1001	-0.0828	0.0946	0.3814	C5orf38	1.43e-27	0.0092	TRUE	118.384
rs1707652	T	C	T	C	0.1001	-0.0828	0.0946	0.3814	C5orf38	1.43e-27	0.0092	TRUE	118.384
rs1707652	T	C	T	C	0.0743	-0.0828	0.0946	0.3814	GSTM3	2.65e-17	0.008781	TRUE	71.5962
rs1707652	T	C	T	C	0.0743	-0.0828	0.0946	0.3814	GSTM3	2.65e-17	0.008781	TRUE	71.5962
rs1707652	T	C	T	C	0.0743	-0.0828	0.0946	0.3814	GSTM3	2.65e-17	0.008781	TRUE	71.5962
rs1707652	T	C	T	C	0.0743	-0.0828	0.0946	0.3814	GSTM3	2.65e-17	0.008781	TRUE	71.5962
rs1707652	T	C	T	C	0.0743	-0.0828	0.0946	0.3814	GSTM3	2.65e-17	0.008781	TRUE	71.5962
rs1707652	T	C	T	C	0.1108	-0.0828	0.0946	0.3814	LRRN1	9.78e-33	0.009298	TRUE	142.004
rs1707652	T	C	T	C	0.1108	-0.0828	0.0946	0.3814	LRRN1	9.78e-33	0.009298	TRUE	142.004
rs1707652	T	C	T	C	0.1108	-0.0828	0.0946	0.3814	LRRN1	9.78e-33	0.009298	TRUE	142.004
rs1707652	T	C	T	C	0.1108	-0.0828	0.0946	0.3814	LRRN1	9.78e-33	0.009298	TRUE	142.004
rs1707652	T	C	T	C	0.1108	-0.0828	0.0946	0.3814	LRRN1	9.78e-33	0.009298	TRUE	142.004
rs145718943	C	G	C	G	0.1189	-0.1869	0.2128	0.3798	HP	9.22e-09	0.020698	TRUE	32.9995
rs145718943	C	G	C	G	0.1189	-0.1869	0.2128	0.3798	HP	9.22e-09	0.020698	TRUE	32.9995
rs145718943	C	G	C	G	0.1189	-0.1869	0.2128	0.3798	HP	9.22e-09	0.020698	TRUE	32.9995
rs145718943	C	G	C	G	0.1189	-0.1869	0.2128	0.3798	HP	9.22e-09	0.020698	TRUE	32.9995
rs145718943	C	G	C	G	0.1189	-0.1869	0.2128	0.3798	HP	9.22e-09	0.020698	TRUE	32.9995
rs117709168	T	G	T	G	0.4399	0.8994	1.0138	0.375	BIRC2	2.65e-24	0.043247	TRUE	103.466
rs117709168	T	G	T	G	0.4399	0.8994	1.0138	0.375	BIRC2	2.65e-24	0.043247	TRUE	103.466
rs117709168	T	G	T	G	0.4399	0.8994	1.0138	0.375	BIRC2	2.65e-24	0.043247	TRUE	103.466
rs117709168	T	G	T	G	0.4399	0.8994	1.0138	0.375	BIRC2	2.65e-24	0.043247	TRUE	103.466
rs117709168	T	G	T	G	0.4399	0.8994	1.0138	0.375	BIRC2	2.65e-24	0.043247	TRUE	103.466
rs2806895	G	C	G	C	-0.1149	0.0831	0.0933	0.3733	MREG	2.73e-37	0.009004	TRUE	162.843
rs2806895	G	C	G	C	-0.1149	0.0831	0.0933	0.3733	MREG	2.73e-37	0.009004	TRUE	162.843
rs2806895	G	C	G	C	-0.1149	0.0831	0.0933	0.3733	MREG	2.73e-37	0.009004	TRUE	162.843
rs2806895	G	C	G	C	-0.1149	0.0831	0.0933	0.3733	MREG	2.73e-37	0.009004	TRUE	162.843
rs2806895	G	C	G	C	-0.1149	0.0831	0.0933	0.3733	MREG	2.73e-37	0.009004	TRUE	162.843
rs6906645	C	T	C	T	0.0768	-0.1169	0.1308	0.3715	GFRAL	1.04e-10	0.011886	TRUE	41.7495
rs6906645	C	T	C	T	0.0768	-0.1169	0.1308	0.3715	GFRAL	1.04e-10	0.011886	TRUE	41.7495
rs6906645	C	T	C	T	0.0768	-0.1169	0.1308	0.3715	GFRAL	1.04e-10	0.011886	TRUE	41.7495
rs6906645	C	T	C	T	0.0768	-0.1169	0.1308	0.3715	GFRAL	1.04e-10	0.011886	TRUE	41.7495
rs6906645	C	T	C	T	0.0768	-0.1169	0.1308	0.3715	GFRAL	1.04e-10	0.011886	TRUE	41.7495
rs77924615	A	G	A	G	-0.0798	0.089	0.0987	0.3676	EPHB6	1.2e-14	0.010342	TRUE	59.5383
rs77924615	A	G	A	G	-0.0798	0.089	0.0987	0.3676	EPHB6	1.2e-14	0.010342	TRUE	59.5383
rs77924615	A	G	A	G	-0.0798	0.089	0.0987	0.3676	EPHB6	1.2e-14	0.010342	TRUE	59.5383
rs77924615	A	G	A	G	-0.0798	0.089	0.0987	0.3676	EPHB6	1.2e-14	0.010342	TRUE	59.5383
rs77924615	A	G	A	G	-0.0798	0.089	0.0987	0.3676	EPHB6	1.2e-14	0.010342	TRUE	59.5383
rs77924615	A	G	A	G	-0.0658	0.089	0.0987	0.3676	MYOC	2.41e-10	0.010391	TRUE	40.0993
rs77924615	A	G	A	G	-0.0658	0.089	0.0987	0.3676	MYOC	2.41e-10	0.010391	TRUE	40.0993
rs77924615	A	G	A	G	-0.0658	0.089	0.0987	0.3676	MYOC	2.41e-10	0.010391	TRUE	40.0993
rs77924615	A	G	A	G	-0.0658	0.089	0.0987	0.3676	MYOC	2.41e-10	0.010391	TRUE	40.0993
rs77924615	A	G	A	G	-0.0658	0.089	0.0987	0.3676	MYOC	2.41e-10	0.010391	TRUE	40.0993
rs1042034	T	C	T	C	0.0593	-0.0833	0.0922	0.3662	C5orf38	4.68e-09	0.010122	TRUE	34.3223
rs1042034	T	C	T	C	0.0593	-0.0833	0.0922	0.3662	C5orf38	4.68e-09	0.010122	TRUE	34.3223
rs1042034	T	C	T	C	0.0593	-0.0833	0.0922	0.3662	C5orf38	4.68e-09	0.010122	TRUE	34.3223
rs1042034	T	C	T	C	0.0593	-0.0833	0.0922	0.3662	C5orf38	4.68e-09	0.010122	TRUE	34.3223
rs1042034	T	C	T	C	0.0593	-0.0833	0.0922	0.3662	C5orf38	4.68e-09	0.010122	TRUE	34.3223
rs77772165	C	T	C	T	0.2977	1.5024	1.6597	0.3653	MREG	5.31e-11	0.045368	TRUE	43.0585
rs77772165	C	T	C	T	0.2977	1.5024	1.6597	0.3653	MREG	5.31e-11	0.045368	TRUE	43.0585
rs77772165	C	T	C	T	0.2977	1.5024	1.6597	0.3653	MREG	5.31e-11	0.045368	TRUE	43.0585
rs77772165	C	T	C	T	0.2977	1.5024	1.6597	0.3653	MREG	5.31e-11	0.045368	TRUE	43.0585
rs77772165	C	T	C	T	0.2977	1.5024	1.6597	0.3653	MREG	5.31e-11	0.045368	TRUE	43.0585
rs77772165	C	T	C	T	0.5801	1.5024	1.6597	0.3653	TDO2	4.11e-35	0.04692	TRUE	152.859
rs77772165	C	T	C	T	0.5801	1.5024	1.6597	0.3653	TDO2	4.11e-35	0.04692	TRUE	152.859
rs77772165	C	T	C	T	0.5801	1.5024	1.6597	0.3653	TDO2	4.11e-35	0.04692	TRUE	152.859
rs77772165	C	T	C	T	0.5801	1.5024	1.6597	0.3653	TDO2	4.11e-35	0.04692	TRUE	152.859
rs77772165	C	T	C	T	0.5801	1.5024	1.6597	0.3653	TDO2	4.11e-35	0.04692	TRUE	152.859
rs4795730	G	A	G	A	0.1144	0.1093	0.1204	0.3639	HN1	6.39e-25	0.011097	TRUE	106.277
rs4795730	G	A	G	A	0.1144	0.1093	0.1204	0.3639	HN1	6.39e-25	0.011097	TRUE	106.277
rs4795730	G	A	G	A	0.1144	0.1093	0.1204	0.3639	HN1	6.39e-25	0.011097	TRUE	106.277
rs4795730	G	A	G	A	0.1144	0.1093	0.1204	0.3639	HN1	6.39e-25	0.011097	TRUE	106.277
rs4795730	G	A	G	A	0.1144	0.1093	0.1204	0.3639	HN1	6.39e-25	0.011097	TRUE	106.277
rs4795730	G	A	G	A	-0.1113	0.1093	0.1204	0.3639	NPFF	7.04e-24	0.011046	TRUE	101.527
rs4795730	G	A	G	A	-0.1113	0.1093	0.1204	0.3639	NPFF	7.04e-24	0.011046	TRUE	101.527
rs4795730	G	A	G	A	-0.1113	0.1093	0.1204	0.3639	NPFF	7.04e-24	0.011046	TRUE	101.527
rs4795730	G	A	G	A	-0.1113	0.1093	0.1204	0.3639	NPFF	7.04e-24	0.011046	TRUE	101.527
rs4795730	G	A	G	A	-0.1113	0.1093	0.1204	0.3639	NPFF	7.04e-24	0.011046	TRUE	101.527
rs74863669	A	G	A	G	-0.3741	0.3559	0.3919	0.3638	PHGDH	5.48e-27	0.034776	TRUE	115.722
rs74863669	A	G	A	G	-0.3741	0.3559	0.3919	0.3638	PHGDH	5.48e-27	0.034776	TRUE	115.722
rs74863669	A	G	A	G	-0.3741	0.3559	0.3919	0.3638	PHGDH	5.48e-27	0.034776	TRUE	115.722
rs74863669	A	G	A	G	-0.3741	0.3559	0.3919	0.3638	PHGDH	5.48e-27	0.034776	TRUE	115.722
rs74863669	A	G	A	G	-0.3741	0.3559	0.3919	0.3638	PHGDH	5.48e-27	0.034776	TRUE	115.722
rs4806777	C	A	C	A	-0.0844	-0.1553	0.1701	0.3612	LILRA5	1.66e-08	0.014953	TRUE	31.8587
rs4806777	C	A	C	A	-0.0844	-0.1553	0.1701	0.3612	LILRA5	1.66e-08	0.014953	TRUE	31.8587
rs4806777	C	A	C	A	-0.0844	-0.1553	0.1701	0.3612	LILRA5	1.66e-08	0.014953	TRUE	31.8587
rs4806777	C	A	C	A	-0.0844	-0.1553	0.1701	0.3612	LILRA5	1.66e-08	0.014953	TRUE	31.8587
rs4806777	C	A	C	A	-0.0844	-0.1553	0.1701	0.3612	LILRA5	1.66e-08	0.014953	TRUE	31.8587
rs9393787	G	A	G	A	-0.3742	0.1686	0.1829	0.3567	MICA	6.06e-13	0.051978	TRUE	51.8285
rs9393787	G	A	G	A	-0.3742	0.1686	0.1829	0.3567	MICA	6.06e-13	0.051978	TRUE	51.8285
rs9393787	G	A	G	A	-0.3742	0.1686	0.1829	0.3567	MICA	6.06e-13	0.051978	TRUE	51.8285
rs9393787	G	A	G	A	-0.3742	0.1686	0.1829	0.3567	MICA	6.06e-13	0.051978	TRUE	51.8285
rs9393787	G	A	G	A	-0.3742	0.1686	0.1829	0.3567	MICA	6.06e-13	0.051978	TRUE	51.8285
rs147906938	A	T	A	T	0.2018	0.2323	0.2516	0.3558	CD96	1.96e-23	0.020231	TRUE	99.4965
rs147906938	A	T	A	T	0.2018	0.2323	0.2516	0.3558	CD96	1.96e-23	0.020231	TRUE	99.4965
rs147906938	A	T	A	T	0.2018	0.2323	0.2516	0.3558	CD96	1.96e-23	0.020231	TRUE	99.4965
rs147906938	A	T	A	T	0.2018	0.2323	0.2516	0.3558	CD96	1.96e-23	0.020231	TRUE	99.4965
rs147906938	A	T	A	T	0.2018	0.2323	0.2516	0.3558	CD96	1.96e-23	0.020231	TRUE	99.4965
rs545525415	C	T	C	T	-0.5712	0.4669	0.5048	0.355	PSMB4	1.57e-26	0.053586	TRUE	113.625
rs545525415	C	T	C	T	-0.5712	0.4669	0.5048	0.355	PSMB4	1.57e-26	0.053586	TRUE	113.625
rs545525415	C	T	C	T	-0.5712	0.4669	0.5048	0.355	PSMB4	1.57e-26	0.053586	TRUE	113.625
rs545525415	C	T	C	T	-0.5712	0.4669	0.5048	0.355	PSMB4	1.57e-26	0.053586	TRUE	113.625
rs545525415	C	T	C	T	-0.5712	0.4669	0.5048	0.355	PSMB4	1.57e-26	0.053586	TRUE	113.625
rs61819223	A	G	A	G	-0.3929	0.3257	0.3518	0.3544	PSMB4	6.46e-15	0.050406	TRUE	60.7575
rs61819223	A	G	A	G	-0.3929	0.3257	0.3518	0.3544	PSMB4	6.46e-15	0.050406	TRUE	60.7575
rs61819223	A	G	A	G	-0.3929	0.3257	0.3518	0.3544	PSMB4	6.46e-15	0.050406	TRUE	60.7575
rs61819223	A	G	A	G	-0.3929	0.3257	0.3518	0.3544	PSMB4	6.46e-15	0.050406	TRUE	60.7575
rs61819223	A	G	A	G	-0.3929	0.3257	0.3518	0.3544	PSMB4	6.46e-15	0.050406	TRUE	60.7575
rs3800337	C	G	C	G	-0.184	-0.1238	0.1327	0.3508	MICA	2.48e-35	0.014834	TRUE	153.858
rs3800337	C	G	C	G	-0.184	-0.1238	0.1327	0.3508	MICA	2.48e-35	0.014834	TRUE	153.858
rs3800337	C	G	C	G	-0.184	-0.1238	0.1327	0.3508	MICA	2.48e-35	0.014834	TRUE	153.858
rs3800337	C	G	C	G	-0.184	-0.1238	0.1327	0.3508	MICA	2.48e-35	0.014834	TRUE	153.858
rs3800337	C	G	C	G	-0.184	-0.1238	0.1327	0.3508	MICA	2.48e-35	0.014834	TRUE	153.858
rs76428106	C	T	C	T	0.2304	-0.3552	0.3793	0.3491	LILRA5	2.96e-10	0.036566	TRUE	39.7018
rs76428106	C	T	C	T	0.2558	-0.3552	0.3793	0.3491	LILRA5	4.42e-12	0.036948	TRUE	47.9313
rs76428106	C	T	C	T	0.2304	-0.3552	0.3793	0.3491	LILRA5	2.96e-10	0.036566	TRUE	39.7018
rs76428106	C	T	C	T	0.2558	-0.3552	0.3793	0.3491	LILRA5	4.42e-12	0.036948	TRUE	47.9313
rs76428106	C	T	C	T	0.2304	-0.3552	0.3793	0.3491	LILRA5	2.96e-10	0.036566	TRUE	39.7018
rs76428106	C	T	C	T	0.2558	-0.3552	0.3793	0.3491	LILRA5	4.42e-12	0.036948	TRUE	47.9313
rs76428106	C	T	C	T	0.2304	-0.3552	0.3793	0.3491	LILRA5	2.96e-10	0.036566	TRUE	39.7018
rs76428106	C	T	C	T	0.2558	-0.3552	0.3793	0.3491	LILRA5	4.42e-12	0.036948	TRUE	47.9313
rs76428106	C	T	C	T	0.2304	-0.3552	0.3793	0.3491	LILRA5	2.96e-10	0.036566	TRUE	39.7018
rs76428106	C	T	C	T	0.2558	-0.3552	0.3793	0.3491	LILRA5	4.42e-12	0.036948	TRUE	47.9313
rs1144393	C	T	C	T	0.3779	-0.0833	0.0887	0.3478	MMP1	0	0.006269	TRUE	3633.77
rs1144393	C	T	C	T	0.3779	-0.0833	0.0887	0.3478	MMP1	0	0.006269	TRUE	3633.77
rs1144393	C	T	C	T	0.3779	-0.0833	0.0887	0.3478	MMP1	0	0.006269	TRUE	3633.77
rs1144393	C	T	C	T	0.3779	-0.0833	0.0887	0.3478	MMP1	0	0.006269	TRUE	3633.77
rs1144393	C	T	C	T	0.3779	-0.0833	0.0887	0.3478	MMP1	0	0.006269	TRUE	3633.77
rs112839059	G	C	G	C	-0.4952	-0.2503	0.2665	0.3476	TDO2	2.15e-67	0.02855	TRUE	300.849
rs112839059	G	C	G	C	-0.4952	-0.2503	0.2665	0.3476	TDO2	2.15e-67	0.02855	TRUE	300.849
rs112839059	G	C	G	C	-0.4952	-0.2503	0.2665	0.3476	TDO2	2.15e-67	0.02855	TRUE	300.849
rs112839059	G	C	G	C	-0.4952	-0.2503	0.2665	0.3476	TDO2	2.15e-67	0.02855	TRUE	300.849
rs112839059	G	C	G	C	-0.4952	-0.2503	0.2665	0.3476	TDO2	2.15e-67	0.02855	TRUE	300.849
rs118004808	T	C	T	C	0.2468	0.3507	0.3717	0.3455	VPS29	3.88e-22	0.025511	TRUE	93.5913
rs118004808	T	C	T	C	0.2468	0.3507	0.3717	0.3455	VPS29	3.88e-22	0.025511	TRUE	93.5913
rs118004808	T	C	T	C	0.2468	0.3507	0.3717	0.3455	VPS29	3.88e-22	0.025511	TRUE	93.5913
rs118004808	T	C	T	C	0.2468	0.3507	0.3717	0.3455	VPS29	3.88e-22	0.025511	TRUE	93.5913
rs118004808	T	C	T	C	0.2468	0.3507	0.3717	0.3455	VPS29	3.88e-22	0.025511	TRUE	93.5913
rs75992103	A	G	A	G	0.1535	-0.2451	0.2557	0.3378	BMP6	4.3e-10	0.024588	TRUE	38.9736
rs75992103	A	G	A	G	0.1535	-0.2451	0.2557	0.3378	BMP6	4.3e-10	0.024588	TRUE	38.9736
rs75992103	A	G	A	G	0.1535	-0.2451	0.2557	0.3378	BMP6	4.3e-10	0.024588	TRUE	38.9736
rs75992103	A	G	A	G	0.1535	-0.2451	0.2557	0.3378	BMP6	4.3e-10	0.024588	TRUE	38.9736
rs75992103	A	G	A	G	0.1535	-0.2451	0.2557	0.3378	BMP6	4.3e-10	0.024588	TRUE	38.9736
rs115216147	A	T	A	T	0.1446	-0.1909	0.1985	0.3361	LGALS3BP	1.07e-21	0.015109	TRUE	91.5936
rs115216147	A	T	A	T	0.1446	-0.1909	0.1985	0.3361	LGALS3BP	1.07e-21	0.015109	TRUE	91.5936
rs115216147	A	T	A	T	0.1446	-0.1909	0.1985	0.3361	LGALS3BP	1.07e-21	0.015109	TRUE	91.5936
rs115216147	A	T	A	T	0.1446	-0.1909	0.1985	0.3361	LGALS3BP	1.07e-21	0.015109	TRUE	91.5936
rs115216147	A	T	A	T	0.1446	-0.1909	0.1985	0.3361	LGALS3BP	1.07e-21	0.015109	TRUE	91.5936
rs214098	A	C	A	C	0.048	-0.0854	0.0887	0.3355	NPTX1	2.54e-08	0.008617	TRUE	31.0292
rs214098	A	C	A	C	0.048	-0.0854	0.0887	0.3355	NPTX1	2.54e-08	0.008617	TRUE	31.0292
rs214098	A	C	A	C	0.048	-0.0854	0.0887	0.3355	NPTX1	2.54e-08	0.008617	TRUE	31.0292
rs214098	A	C	A	C	0.048	-0.0854	0.0887	0.3355	NPTX1	2.54e-08	0.008617	TRUE	31.0292
rs214098	A	C	A	C	0.048	-0.0854	0.0887	0.3355	NPTX1	2.54e-08	0.008617	TRUE	31.0292
rs10137242	T	C	T	C	0.2029	0.1138	0.1174	0.3323	NID2	8.19e-62	0.01223	TRUE	275.24
rs10137242	T	C	T	C	0.2029	0.1138	0.1174	0.3323	NID2	8.19e-62	0.01223	TRUE	275.24
rs10137242	T	C	T	C	0.2029	0.1138	0.1174	0.3323	NID2	8.19e-62	0.01223	TRUE	275.24
rs10137242	T	C	T	C	0.2029	0.1138	0.1174	0.3323	NID2	8.19e-62	0.01223	TRUE	275.24
rs10137242	T	C	T	C	0.2029	0.1138	0.1174	0.3323	NID2	8.19e-62	0.01223	TRUE	275.24
rs74428318	C	G	C	G	0.2322	-1.1733	1.2049	0.3302	ING4	3.41e-14	0.030627	TRUE	57.4798
rs74428318	C	G	C	G	0.2322	-1.1733	1.2049	0.3302	ING4	3.41e-14	0.030627	TRUE	57.4798
rs74428318	C	G	C	G	0.2322	-1.1733	1.2049	0.3302	ING4	3.41e-14	0.030627	TRUE	57.4798
rs74428318	C	G	C	G	0.2322	-1.1733	1.2049	0.3302	ING4	3.41e-14	0.030627	TRUE	57.4798
rs74428318	C	G	C	G	0.2322	-1.1733	1.2049	0.3302	ING4	3.41e-14	0.030627	TRUE	57.4798
rs74428318	C	G	C	G	0.3048	-1.1733	1.2049	0.3302	PHGDH	4.55e-22	0.03156	TRUE	93.273
rs74428318	C	G	C	G	0.3048	-1.1733	1.2049	0.3302	PHGDH	4.55e-22	0.03156	TRUE	93.273
rs74428318	C	G	C	G	0.3048	-1.1733	1.2049	0.3302	PHGDH	4.55e-22	0.03156	TRUE	93.273
rs74428318	C	G	C	G	0.3048	-1.1733	1.2049	0.3302	PHGDH	4.55e-22	0.03156	TRUE	93.273
rs74428318	C	G	C	G	0.3048	-1.1733	1.2049	0.3302	PHGDH	4.55e-22	0.03156	TRUE	93.273
rs145983427	A	C	A	C	-0.297	-0.3309	0.3376	0.327	LGALS3BP	1.82e-26	0.027898	TRUE	113.336
rs145983427	A	C	A	C	-0.297	-0.3309	0.3376	0.327	LGALS3BP	1.82e-26	0.027898	TRUE	113.336
rs145983427	A	C	A	C	-0.297	-0.3309	0.3376	0.327	LGALS3BP	1.82e-26	0.027898	TRUE	113.336
rs145983427	A	C	A	C	-0.297	-0.3309	0.3376	0.327	LGALS3BP	1.82e-26	0.027898	TRUE	113.336
rs145983427	A	C	A	C	-0.297	-0.3309	0.3376	0.327	LGALS3BP	1.82e-26	0.027898	TRUE	113.336
rs12529201	T	C	T	C	-0.1457	-0.0851	0.0855	0.3196	GFRAL	1.75e-57	0.009117	TRUE	255.397
rs12529201	T	C	T	C	-0.1457	-0.0851	0.0855	0.3196	GFRAL	1.75e-57	0.009117	TRUE	255.397
rs12529201	T	C	T	C	-0.1457	-0.0851	0.0855	0.3196	GFRAL	1.75e-57	0.009117	TRUE	255.397
rs12529201	T	C	T	C	-0.1457	-0.0851	0.0855	0.3196	GFRAL	1.75e-57	0.009117	TRUE	255.397
rs12529201	T	C	T	C	-0.1457	-0.0851	0.0855	0.3196	GFRAL	1.75e-57	0.009117	TRUE	255.397
rs80014185	T	G	T	G	0.1742	-0.1984	0.1982	0.3169	NPFF	3e-09	0.029368	TRUE	35.1842
rs80014185	T	G	T	G	0.1742	-0.1984	0.1982	0.3169	NPFF	3e-09	0.029368	TRUE	35.1842
rs80014185	T	G	T	G	0.1742	-0.1984	0.1982	0.3169	NPFF	3e-09	0.029368	TRUE	35.1842
rs80014185	T	G	T	G	0.1742	-0.1984	0.1982	0.3169	NPFF	3e-09	0.029368	TRUE	35.1842
rs80014185	T	G	T	G	0.1742	-0.1984	0.1982	0.3169	NPFF	3e-09	0.029368	TRUE	35.1842
rs647932	T	C	T	C	0.076	0.1709	0.1697	0.314	CD93	1.43e-08	0.013404	TRUE	32.1483
rs647932	T	C	T	C	0.076	0.1709	0.1697	0.314	CD93	1.43e-08	0.013404	TRUE	32.1483
rs647932	T	C	T	C	0.076	0.1709	0.1697	0.314	CD93	1.43e-08	0.013404	TRUE	32.1483
rs647932	T	C	T	C	0.076	0.1709	0.1697	0.314	CD93	1.43e-08	0.013404	TRUE	32.1483
rs647932	T	C	T	C	0.076	0.1709	0.1697	0.314	CD93	1.43e-08	0.013404	TRUE	32.1483
rs35681564	A	G	A	G	0.1103	0.1027	0.1016	0.3118	ING4	2.92e-24	0.010854	TRUE	103.269
rs35681564	A	G	A	G	0.1103	0.1027	0.1016	0.3118	ING4	2.92e-24	0.010854	TRUE	103.269
rs35681564	A	G	A	G	0.1103	0.1027	0.1016	0.3118	ING4	2.92e-24	0.010854	TRUE	103.269
rs35681564	A	G	A	G	0.1103	0.1027	0.1016	0.3118	ING4	2.92e-24	0.010854	TRUE	103.269
rs35681564	A	G	A	G	0.1103	0.1027	0.1016	0.3118	ING4	2.92e-24	0.010854	TRUE	103.269
rs144481490	T	C	T	C	-0.3464	0.2431	0.2367	0.3043	MMP1	1.05e-16	0.041739	TRUE	68.8766
rs144481490	T	C	T	C	-0.3464	0.2431	0.2367	0.3043	MMP1	1.05e-16	0.041739	TRUE	68.8766
rs144481490	T	C	T	C	-0.3464	0.2431	0.2367	0.3043	MMP1	1.05e-16	0.041739	TRUE	68.8766
rs144481490	T	C	T	C	-0.3464	0.2431	0.2367	0.3043	MMP1	1.05e-16	0.041739	TRUE	68.8766
rs144481490	T	C	T	C	-0.3464	0.2431	0.2367	0.3043	MMP1	1.05e-16	0.041739	TRUE	68.8766
rs9640	A	T	A	T	0.2796	0.1077	0.1046	0.303	C1QTNF5	1.65e-117	0.012133	TRUE	531.053
rs9640	A	T	A	T	0.2796	0.1077	0.1046	0.303	C1QTNF5	1.65e-117	0.012133	TRUE	531.053
rs9640	A	T	A	T	0.2796	0.1077	0.1046	0.303	C1QTNF5	1.65e-117	0.012133	TRUE	531.053
rs9640	A	T	A	T	0.2796	0.1077	0.1046	0.303	C1QTNF5	1.65e-117	0.012133	TRUE	531.053
rs9640	A	T	A	T	0.2796	0.1077	0.1046	0.303	C1QTNF5	1.65e-117	0.012133	TRUE	531.053
rs27289	T	G	T	G	-0.1073	-0.086	0.0831	0.3011	C1QTNF5	6.43e-38	0.008336	TRUE	165.685
rs27289	T	G	T	G	-0.1073	-0.086	0.0831	0.3011	C1QTNF5	6.43e-38	0.008336	TRUE	165.685
rs27289	T	G	T	G	-0.1073	-0.086	0.0831	0.3011	C1QTNF5	6.43e-38	0.008336	TRUE	165.685
rs27289	T	G	T	G	-0.1073	-0.086	0.0831	0.3011	C1QTNF5	6.43e-38	0.008336	TRUE	165.685
rs27289	T	G	T	G	-0.1073	-0.086	0.0831	0.3011	C1QTNF5	6.43e-38	0.008336	TRUE	165.685
rs2244856	T	C	T	C	0.058	-0.1019	0.0977	0.2969	GLUL	2.36e-08	0.010388	TRUE	31.174
rs2244856	T	C	T	C	0.058	-0.1019	0.0977	0.2969	GLUL	2.36e-08	0.010388	TRUE	31.174
rs2244856	T	C	T	C	0.058	-0.1019	0.0977	0.2969	GLUL	2.36e-08	0.010388	TRUE	31.174
rs2244856	T	C	T	C	0.058	-0.1019	0.0977	0.2969	GLUL	2.36e-08	0.010388	TRUE	31.174
rs2244856	T	C	T	C	0.058	-0.1019	0.0977	0.2969	GLUL	2.36e-08	0.010388	TRUE	31.174
rs60373308	A	G	A	G	-0.0543	-0.1165	0.1116	0.2967	CD93	2.94e-08	0.009792	TRUE	30.7508
rs60373308	A	G	A	G	-0.0543	-0.1165	0.1116	0.2967	CD93	2.94e-08	0.009792	TRUE	30.7508
rs60373308	A	G	A	G	-0.0543	-0.1165	0.1116	0.2967	CD93	2.94e-08	0.009792	TRUE	30.7508
rs60373308	A	G	A	G	-0.0543	-0.1165	0.1116	0.2967	CD93	2.94e-08	0.009792	TRUE	30.7508
rs60373308	A	G	A	G	-0.0543	-0.1165	0.1116	0.2967	CD93	2.94e-08	0.009792	TRUE	30.7508
rs72704449	C	T	C	T	0.1815	0.1755	0.1664	0.2915	CD93	2.21e-20	0.019618	TRUE	85.5941
rs72704449	C	T	C	T	0.1815	0.1755	0.1664	0.2915	CD93	2.21e-20	0.019618	TRUE	85.5941
rs72704449	C	T	C	T	0.1815	0.1755	0.1664	0.2915	CD93	2.21e-20	0.019618	TRUE	85.5941
rs72704449	C	T	C	T	0.1815	0.1755	0.1664	0.2915	CD93	2.21e-20	0.019618	TRUE	85.5941
rs72704449	C	T	C	T	0.1815	0.1755	0.1664	0.2915	CD93	2.21e-20	0.019618	TRUE	85.5941
rs72704449	C	T	C	T	0.1253	0.1755	0.1664	0.2915	SERPINF1	1.91e-10	0.019674	TRUE	40.5618
rs72704449	C	T	C	T	0.1253	0.1755	0.1664	0.2915	SERPINF1	1.91e-10	0.019674	TRUE	40.5618
rs72704449	C	T	C	T	0.1253	0.1755	0.1664	0.2915	SERPINF1	1.91e-10	0.019674	TRUE	40.5618
rs72704449	C	T	C	T	0.1253	0.1755	0.1664	0.2915	SERPINF1	1.91e-10	0.019674	TRUE	40.5618
rs72704449	C	T	C	T	0.1253	0.1755	0.1664	0.2915	SERPINF1	1.91e-10	0.019674	TRUE	40.5618
rs1042445	T	C	T	C	0.0631	0.0968	0.0903	0.2838	CYB5D2	9.51e-12	0.009261	TRUE	46.424
rs1042445	T	C	T	C	0.0631	0.0968	0.0903	0.2838	CYB5D2	9.51e-12	0.009261	TRUE	46.424
rs1042445	T	C	T	C	0.0631	0.0968	0.0903	0.2838	CYB5D2	9.51e-12	0.009261	TRUE	46.424
rs1042445	T	C	T	C	0.0631	0.0968	0.0903	0.2838	CYB5D2	9.51e-12	0.009261	TRUE	46.424
rs1042445	T	C	T	C	0.0631	0.0968	0.0903	0.2838	CYB5D2	9.51e-12	0.009261	TRUE	46.424
rs7200738	G	A	G	A	0.1616	-0.1524	0.1422	0.2838	HP	4.93e-45	0.011476	TRUE	198.29
rs7200738	G	A	G	A	0.1616	-0.1524	0.1422	0.2838	HP	4.93e-45	0.011476	TRUE	198.29
rs7200738	G	A	G	A	0.1616	-0.1524	0.1422	0.2838	HP	4.93e-45	0.011476	TRUE	198.29
rs7200738	G	A	G	A	0.1616	-0.1524	0.1422	0.2838	HP	4.93e-45	0.011476	TRUE	198.29
rs7200738	G	A	G	A	0.1616	-0.1524	0.1422	0.2838	HP	4.93e-45	0.011476	TRUE	198.29
rs13108218	G	A	G	A	0.051	0.0938	0.0875	0.2833	CD93	2.44e-09	0.008549	TRUE	35.5885
rs13108218	G	A	G	A	0.051	0.0938	0.0875	0.2833	CD93	2.44e-09	0.008549	TRUE	35.5885
rs13108218	G	A	G	A	0.051	0.0938	0.0875	0.2833	CD93	2.44e-09	0.008549	TRUE	35.5885
rs13108218	G	A	G	A	0.051	0.0938	0.0875	0.2833	CD93	2.44e-09	0.008549	TRUE	35.5885
rs13108218	G	A	G	A	0.051	0.0938	0.0875	0.2833	CD93	2.44e-09	0.008549	TRUE	35.5885
rs67328311	T	G	T	G	0.0474	-0.0887	0.0824	0.2816	CACNA2D3	1.76e-08	0.008414	TRUE	31.736
rs67328311	T	G	T	G	0.0474	-0.0887	0.0824	0.2816	CACNA2D3	1.76e-08	0.008414	TRUE	31.736
rs67328311	T	G	T	G	0.0474	-0.0887	0.0824	0.2816	CACNA2D3	1.76e-08	0.008414	TRUE	31.736
rs67328311	T	G	T	G	0.0474	-0.0887	0.0824	0.2816	CACNA2D3	1.76e-08	0.008414	TRUE	31.736
rs67328311	T	G	T	G	0.0474	-0.0887	0.0824	0.2816	CACNA2D3	1.76e-08	0.008414	TRUE	31.736
rs58473959	G	A	G	A	-0.3964	-0.4562	0.4231	0.2809	MMP1	1.63e-08	0.070192	TRUE	31.8928
rs58473959	G	A	G	A	-0.3964	-0.4562	0.4231	0.2809	MMP1	1.63e-08	0.070192	TRUE	31.8928
rs58473959	G	A	G	A	-0.3964	-0.4562	0.4231	0.2809	MMP1	1.63e-08	0.070192	TRUE	31.8928
rs58473959	G	A	G	A	-0.3964	-0.4562	0.4231	0.2809	MMP1	1.63e-08	0.070192	TRUE	31.8928
rs58473959	G	A	G	A	-0.3964	-0.4562	0.4231	0.2809	MMP1	1.63e-08	0.070192	TRUE	31.8928
rs190151009	G	C	G	C	0.1636	0.3405	0.315	0.2798	PSMB9	5.46e-15	0.020932	TRUE	61.0865
rs190151009	G	C	G	C	0.1636	0.3405	0.315	0.2798	PSMB9	5.46e-15	0.020932	TRUE	61.0865
rs190151009	G	C	G	C	0.1636	0.3405	0.315	0.2798	PSMB9	5.46e-15	0.020932	TRUE	61.0865
rs190151009	G	C	G	C	0.1636	0.3405	0.315	0.2798	PSMB9	5.46e-15	0.020932	TRUE	61.0865
rs190151009	G	C	G	C	0.1636	0.3405	0.315	0.2798	PSMB9	5.46e-15	0.020932	TRUE	61.0865
rs74675136	T	C	T	C	-0.8771	0.3043	0.2806	0.2782	MMP1	3.89e-100	0.04129	TRUE	451.241
rs74675136	T	C	T	C	-0.8771	0.3043	0.2806	0.2782	MMP1	3.89e-100	0.04129	TRUE	451.241
rs74675136	T	C	T	C	-0.8771	0.3043	0.2806	0.2782	MMP1	3.89e-100	0.04129	TRUE	451.241
rs74675136	T	C	T	C	-0.8771	0.3043	0.2806	0.2782	MMP1	3.89e-100	0.04129	TRUE	451.241
rs74675136	T	C	T	C	-0.8771	0.3043	0.2806	0.2782	MMP1	3.89e-100	0.04129	TRUE	451.241
rs655029	A	G	A	G	0.0518	0.1004	0.0923	0.2768	SELP	1.2e-08	0.009087	TRUE	32.4951
rs655029	A	G	A	G	0.0518	0.1004	0.0923	0.2768	SELP	1.2e-08	0.009087	TRUE	32.4951
rs655029	A	G	A	G	0.0518	0.1004	0.0923	0.2768	SELP	1.2e-08	0.009087	TRUE	32.4951
rs655029	A	G	A	G	0.0518	0.1004	0.0923	0.2768	SELP	1.2e-08	0.009087	TRUE	32.4951
rs655029	A	G	A	G	0.0518	0.1004	0.0923	0.2768	SELP	1.2e-08	0.009087	TRUE	32.4951
rs115401532	T	C	T	C	0.7372	-0.8906	0.817	0.2757	MICB	5.56e-31	0.063693	TRUE	133.964
rs115401532	T	C	T	C	0.7372	-0.8906	0.817	0.2757	MICB	5.56e-31	0.063693	TRUE	133.964
rs115401532	T	C	T	C	0.7372	-0.8906	0.817	0.2757	MICB	5.56e-31	0.063693	TRUE	133.964
rs115401532	T	C	T	C	0.7372	-0.8906	0.817	0.2757	MICB	5.56e-31	0.063693	TRUE	133.964
rs115401532	T	C	T	C	0.7372	-0.8906	0.817	0.2757	MICB	5.56e-31	0.063693	TRUE	133.964
rs114435241	A	G	A	G	-0.0948	-0.161	0.1472	0.2742	C1QTNF5	2.33e-08	0.016973	TRUE	31.196
rs114435241	A	G	A	G	-0.0948	-0.161	0.1472	0.2742	C1QTNF5	2.33e-08	0.016973	TRUE	31.196
rs114435241	A	G	A	G	-0.0948	-0.161	0.1472	0.2742	C1QTNF5	2.33e-08	0.016973	TRUE	31.196
rs114435241	A	G	A	G	-0.0948	-0.161	0.1472	0.2742	C1QTNF5	2.33e-08	0.016973	TRUE	31.196
rs114435241	A	G	A	G	-0.0948	-0.161	0.1472	0.2742	C1QTNF5	2.33e-08	0.016973	TRUE	31.196
rs61817641	T	C	T	C	-0.0568	-0.1017	0.0929	0.2738	LILRA5	1.22e-08	0.009969	TRUE	32.4634
rs61817641	T	C	T	C	-0.0568	-0.1017	0.0929	0.2738	LILRA5	1.22e-08	0.009969	TRUE	32.4634
rs61817641	T	C	T	C	-0.0568	-0.1017	0.0929	0.2738	LILRA5	1.22e-08	0.009969	TRUE	32.4634
rs61817641	T	C	T	C	-0.0568	-0.1017	0.0929	0.2738	LILRA5	1.22e-08	0.009969	TRUE	32.4634
rs61817641	T	C	T	C	-0.0568	-0.1017	0.0929	0.2738	LILRA5	1.22e-08	0.009969	TRUE	32.4634
rs2859248	G	A	G	A	0.0929	0.167	0.1513	0.2697	MYOC	8.3e-10	0.015133	TRUE	37.6861
rs2859248	G	A	G	A	0.0929	0.167	0.1513	0.2697	MYOC	8.3e-10	0.015133	TRUE	37.6861
rs2859248	G	A	G	A	0.0929	0.167	0.1513	0.2697	MYOC	8.3e-10	0.015133	TRUE	37.6861
rs2859248	G	A	G	A	0.0929	0.167	0.1513	0.2697	MYOC	8.3e-10	0.015133	TRUE	37.6861
rs2859248	G	A	G	A	0.0929	0.167	0.1513	0.2697	MYOC	8.3e-10	0.015133	TRUE	37.6861
rs6136	G	T	G	T	-0.3964	-0.1386	0.1249	0.2671	SELP	1.48e-227	0.012308	TRUE	1037.27
rs6136	G	T	G	T	-0.3964	-0.1386	0.1249	0.2671	SELP	1.48e-227	0.012308	TRUE	1037.27
rs6136	G	T	G	T	-0.3964	-0.1386	0.1249	0.2671	SELP	1.48e-227	0.012308	TRUE	1037.27
rs6136	G	T	G	T	-0.3964	-0.1386	0.1249	0.2671	SELP	1.48e-227	0.012308	TRUE	1037.27
rs6136	G	T	G	T	-0.3964	-0.1386	0.1249	0.2671	SELP	1.48e-227	0.012308	TRUE	1037.27
rs116664727	A	G	A	G	0.1777	-0.2185	0.1962	0.2655	SPINK6	1.35e-50	0.011879	TRUE	223.777
rs116664727	A	G	A	G	0.1777	-0.2185	0.1962	0.2655	SPINK6	1.35e-50	0.011879	TRUE	223.777
rs116664727	A	G	A	G	0.1777	-0.2185	0.1962	0.2655	SPINK6	1.35e-50	0.011879	TRUE	223.777
rs116664727	A	G	A	G	0.1777	-0.2185	0.1962	0.2655	SPINK6	1.35e-50	0.011879	TRUE	223.777
rs116664727	A	G	A	G	0.1777	-0.2185	0.1962	0.2655	SPINK6	1.35e-50	0.011879	TRUE	223.777
rs78258914	C	G	C	G	0.2715	-0.1639	0.147	0.2647	CACNA2D3	2.05e-94	0.013171	TRUE	424.915
rs78258914	C	G	C	G	0.2715	-0.1639	0.147	0.2647	CACNA2D3	2.05e-94	0.013171	TRUE	424.915
rs78258914	C	G	C	G	0.2715	-0.1639	0.147	0.2647	CACNA2D3	2.05e-94	0.013171	TRUE	424.915
rs78258914	C	G	C	G	0.2715	-0.1639	0.147	0.2647	CACNA2D3	2.05e-94	0.013171	TRUE	424.915
rs78258914	C	G	C	G	0.2715	-0.1639	0.147	0.2647	CACNA2D3	2.05e-94	0.013171	TRUE	424.915
rs1253678	A	G	A	G	-0.3319	-0.1012	0.0902	0.2617	NID2	0	0.006906	TRUE	2309.73
rs1253678	A	G	A	G	-0.3319	-0.1012	0.0902	0.2617	NID2	0	0.006906	TRUE	2309.73
rs1253678	A	G	A	G	-0.3319	-0.1012	0.0902	0.2617	NID2	0	0.006906	TRUE	2309.73
rs1253678	A	G	A	G	-0.3319	-0.1012	0.0902	0.2617	NID2	0	0.006906	TRUE	2309.73
rs1253678	A	G	A	G	-0.3319	-0.1012	0.0902	0.2617	NID2	0	0.006906	TRUE	2309.73
rs114694170	C	T	C	T	0.1022	-0.1979	0.1763	0.2616	OAZ1	6.57e-12	0.014883	TRUE	47.1542
rs114694170	C	T	C	T	0.1022	-0.1979	0.1763	0.2616	OAZ1	6.57e-12	0.014883	TRUE	47.1542
rs114694170	C	T	C	T	0.1022	-0.1979	0.1763	0.2616	OAZ1	6.57e-12	0.014883	TRUE	47.1542
rs114694170	C	T	C	T	0.1022	-0.1979	0.1763	0.2616	OAZ1	6.57e-12	0.014883	TRUE	47.1542
rs114694170	C	T	C	T	0.1022	-0.1979	0.1763	0.2616	OAZ1	6.57e-12	0.014883	TRUE	47.1542
rs114694170	C	T	C	T	0.1235	-0.1979	0.1763	0.2616	PAWR	6.54e-17	0.014781	TRUE	69.8114
rs114694170	C	T	C	T	0.1235	-0.1979	0.1763	0.2616	PAWR	6.54e-17	0.014781	TRUE	69.8114
rs114694170	C	T	C	T	0.1235	-0.1979	0.1763	0.2616	PAWR	6.54e-17	0.014781	TRUE	69.8114
rs114694170	C	T	C	T	0.1235	-0.1979	0.1763	0.2616	PAWR	6.54e-17	0.014781	TRUE	69.8114
rs114694170	C	T	C	T	0.1235	-0.1979	0.1763	0.2616	PAWR	6.54e-17	0.014781	TRUE	69.8114
rs76729621	G	C	G	C	0.1155	0.1729	0.154	0.2614	LILRA5	2.17e-12	0.016445	TRUE	49.3283
rs76729621	G	C	G	C	0.1155	0.1729	0.154	0.2614	LILRA5	2.17e-12	0.016445	TRUE	49.3283
rs76729621	G	C	G	C	0.1155	0.1729	0.154	0.2614	LILRA5	2.17e-12	0.016445	TRUE	49.3283
rs76729621	G	C	G	C	0.1155	0.1729	0.154	0.2614	LILRA5	2.17e-12	0.016445	TRUE	49.3283
rs76729621	G	C	G	C	0.1155	0.1729	0.154	0.2614	LILRA5	2.17e-12	0.016445	TRUE	49.3283
rs142006494	A	G	A	G	0.1189	0.2694	0.2388	0.2593	TDO2	2.05e-08	0.021204	TRUE	31.4433
rs142006494	A	G	A	G	0.1189	0.2694	0.2388	0.2593	TDO2	2.05e-08	0.021204	TRUE	31.4433
rs142006494	A	G	A	G	0.1189	0.2694	0.2388	0.2593	TDO2	2.05e-08	0.021204	TRUE	31.4433
rs142006494	A	G	A	G	0.1189	0.2694	0.2388	0.2593	TDO2	2.05e-08	0.021204	TRUE	31.4433
rs142006494	A	G	A	G	0.1189	0.2694	0.2388	0.2593	TDO2	2.05e-08	0.021204	TRUE	31.4433
rs62140549	G	A	G	A	0.0676	-0.0997	0.0883	0.2584	C11orf87	9.34e-15	0.008725	TRUE	60.0292
rs62140549	G	A	G	A	0.0676	-0.0997	0.0883	0.2584	C11orf87	9.34e-15	0.008725	TRUE	60.0292
rs62140549	G	A	G	A	0.0676	-0.0997	0.0883	0.2584	C11orf87	9.34e-15	0.008725	TRUE	60.0292
rs62140549	G	A	G	A	0.0676	-0.0997	0.0883	0.2584	C11orf87	9.34e-15	0.008725	TRUE	60.0292
rs62140549	G	A	G	A	0.0676	-0.0997	0.0883	0.2584	C11orf87	9.34e-15	0.008725	TRUE	60.0292
rs77894138	T	G	T	G	-0.1658	-0.185	0.1628	0.256	TDO2	8.99e-28	0.01518	TRUE	119.296
rs77894138	T	G	T	G	-0.1658	-0.185	0.1628	0.256	TDO2	8.99e-28	0.01518	TRUE	119.296
rs77894138	T	G	T	G	-0.1658	-0.185	0.1628	0.256	TDO2	8.99e-28	0.01518	TRUE	119.296
rs77894138	T	G	T	G	-0.1658	-0.185	0.1628	0.256	TDO2	8.99e-28	0.01518	TRUE	119.296
rs77894138	T	G	T	G	-0.1658	-0.185	0.1628	0.256	TDO2	8.99e-28	0.01518	TRUE	119.296
rs1800588	T	C	T	C	0.0684	0.1074	0.0943	0.2549	C5orf38	2.68e-10	0.010829	TRUE	39.8966
rs1800588	T	C	T	C	0.0684	0.1074	0.0943	0.2549	C5orf38	2.68e-10	0.010829	TRUE	39.8966
rs1800588	T	C	T	C	0.0684	0.1074	0.0943	0.2549	C5orf38	2.68e-10	0.010829	TRUE	39.8966
rs1800588	T	C	T	C	0.0684	0.1074	0.0943	0.2549	C5orf38	2.68e-10	0.010829	TRUE	39.8966
rs1800588	T	C	T	C	0.0684	0.1074	0.0943	0.2549	C5orf38	2.68e-10	0.010829	TRUE	39.8966
rs111278137	A	G	A	G	0.3717	0.4752	0.4146	0.2517	VPS29	3.79e-29	0.033168	TRUE	125.588
rs111278137	A	G	A	G	0.3717	0.4752	0.4146	0.2517	VPS29	3.79e-29	0.033168	TRUE	125.588
rs111278137	A	G	A	G	0.3717	0.4752	0.4146	0.2517	VPS29	3.79e-29	0.033168	TRUE	125.588
rs111278137	A	G	A	G	0.3717	0.4752	0.4146	0.2517	VPS29	3.79e-29	0.033168	TRUE	125.588
rs111278137	A	G	A	G	0.3717	0.4752	0.4146	0.2517	VPS29	3.79e-29	0.033168	TRUE	125.588
rs550671	T	C	T	C	0.0877	0.1783	0.1546	0.2488	HN1	3.52e-14	0.011574	TRUE	57.4159
rs550671	T	C	T	C	0.0877	0.1783	0.1546	0.2488	HN1	3.52e-14	0.011574	TRUE	57.4159
rs550671	T	C	T	C	0.0877	0.1783	0.1546	0.2488	HN1	3.52e-14	0.011574	TRUE	57.4159
rs550671	T	C	T	C	0.0877	0.1783	0.1546	0.2488	HN1	3.52e-14	0.011574	TRUE	57.4159
rs550671	T	C	T	C	0.0877	0.1783	0.1546	0.2488	HN1	3.52e-14	0.011574	TRUE	57.4159
rs550671	T	C	T	C	0.0645	0.1783	0.1546	0.2488	PSMB9	1.43e-08	0.011375	TRUE	32.1526
rs550671	T	C	T	C	0.0645	0.1783	0.1546	0.2488	PSMB9	1.43e-08	0.011375	TRUE	32.1526
rs550671	T	C	T	C	0.0645	0.1783	0.1546	0.2488	PSMB9	1.43e-08	0.011375	TRUE	32.1526
rs550671	T	C	T	C	0.0645	0.1783	0.1546	0.2488	PSMB9	1.43e-08	0.011375	TRUE	32.1526
rs550671	T	C	T	C	0.0645	0.1783	0.1546	0.2488	PSMB9	1.43e-08	0.011375	TRUE	32.1526
rs453821	T	C	T	C	0.0656	0.1786	0.1546	0.248	TMPRSS11D	8.15e-09	0.011378	TRUE	33.2411
rs453821	T	C	T	C	0.0656	0.1786	0.1546	0.248	TMPRSS11D	8.15e-09	0.011378	TRUE	33.2411
rs453821	T	C	T	C	0.0656	0.1786	0.1546	0.248	TMPRSS11D	8.15e-09	0.011378	TRUE	33.2411
rs453821	T	C	T	C	0.0656	0.1786	0.1546	0.248	TMPRSS11D	8.15e-09	0.011378	TRUE	33.2411
rs453821	T	C	T	C	0.0656	0.1786	0.1546	0.248	TMPRSS11D	8.15e-09	0.011378	TRUE	33.2411
rs113811336	C	A	C	A	-0.1551	-0.2183	0.1883	0.2462	PHGDH	8.86e-14	0.020799	TRUE	55.6082
rs113811336	C	A	C	A	-0.1551	-0.2183	0.1883	0.2462	PHGDH	8.86e-14	0.020799	TRUE	55.6082
rs113811336	C	A	C	A	-0.1551	-0.2183	0.1883	0.2462	PHGDH	8.86e-14	0.020799	TRUE	55.6082
rs113811336	C	A	C	A	-0.1551	-0.2183	0.1883	0.2462	PHGDH	8.86e-14	0.020799	TRUE	55.6082
rs113811336	C	A	C	A	-0.1551	-0.2183	0.1883	0.2462	PHGDH	8.86e-14	0.020799	TRUE	55.6082
rs6698722	A	G	A	G	0.0624	-0.114	0.0982	0.2457	GLUL	1.4e-09	0.010305	TRUE	36.6668
rs6698722	A	G	A	G	0.0624	-0.114	0.0982	0.2457	GLUL	1.4e-09	0.010305	TRUE	36.6668
rs6698722	A	G	A	G	0.0624	-0.114	0.0982	0.2457	GLUL	1.4e-09	0.010305	TRUE	36.6668
rs6698722	A	G	A	G	0.0624	-0.114	0.0982	0.2457	GLUL	1.4e-09	0.010305	TRUE	36.6668
rs6698722	A	G	A	G	0.0624	-0.114	0.0982	0.2457	GLUL	1.4e-09	0.010305	TRUE	36.6668
rs33964119	T	C	T	C	0.2339	-0.3637	0.3112	0.2425	HP	1e-23	0.023294	TRUE	100.826
rs33964119	T	C	T	C	0.2339	-0.3637	0.3112	0.2425	HP	1e-23	0.023294	TRUE	100.826
rs33964119	T	C	T	C	0.2339	-0.3637	0.3112	0.2425	HP	1e-23	0.023294	TRUE	100.826
rs33964119	T	C	T	C	0.2339	-0.3637	0.3112	0.2425	HP	1e-23	0.023294	TRUE	100.826
rs33964119	T	C	T	C	0.2339	-0.3637	0.3112	0.2425	HP	1e-23	0.023294	TRUE	100.826
rs75741088	T	A	T	A	0.5143	0.3244	0.2763	0.2404	GSTM3	4.51e-11	0.078087	TRUE	43.3786
rs75741088	T	A	T	A	0.5143	0.3244	0.2763	0.2404	GSTM3	4.51e-11	0.078087	TRUE	43.3786
rs75741088	T	A	T	A	0.5143	0.3244	0.2763	0.2404	GSTM3	4.51e-11	0.078087	TRUE	43.3786
rs75741088	T	A	T	A	0.5143	0.3244	0.2763	0.2404	GSTM3	4.51e-11	0.078087	TRUE	43.3786
rs75741088	T	A	T	A	0.5143	0.3244	0.2763	0.2404	GSTM3	4.51e-11	0.078087	TRUE	43.3786
rs146701335	A	G	A	G	-0.2972	0.2535	0.215	0.2383	SH3BGRL3	1.66e-14	0.038726	TRUE	58.8969
rs146701335	A	G	A	G	-0.2972	0.2535	0.215	0.2383	SH3BGRL3	1.66e-14	0.038726	TRUE	58.8969
rs146701335	A	G	A	G	-0.2972	0.2535	0.215	0.2383	SH3BGRL3	1.66e-14	0.038726	TRUE	58.8969
rs146701335	A	G	A	G	-0.2972	0.2535	0.215	0.2383	SH3BGRL3	1.66e-14	0.038726	TRUE	58.8969
rs146701335	A	G	A	G	-0.2972	0.2535	0.215	0.2383	SH3BGRL3	1.66e-14	0.038726	TRUE	58.8969
rs112385133	G	A	G	A	-0.069	0.1272	0.1074	0.2363	OAZ1	2.78e-10	0.010934	TRUE	39.8236
rs112385133	G	A	G	A	-0.069	0.1272	0.1074	0.2363	OAZ1	2.78e-10	0.010934	TRUE	39.8236
rs112385133	G	A	G	A	-0.069	0.1272	0.1074	0.2363	OAZ1	2.78e-10	0.010934	TRUE	39.8236
rs112385133	G	A	G	A	-0.069	0.1272	0.1074	0.2363	OAZ1	2.78e-10	0.010934	TRUE	39.8236
rs112385133	G	A	G	A	-0.069	0.1272	0.1074	0.2363	OAZ1	2.78e-10	0.010934	TRUE	39.8236
rs76580987	T	C	T	C	0.2584	-0.1853	0.156	0.2348	PTGR1	3.69e-55	0.016518	TRUE	244.72
rs76580987	T	C	T	C	0.2584	-0.1853	0.156	0.2348	PTGR1	3.69e-55	0.016518	TRUE	244.72
rs76580987	T	C	T	C	0.2584	-0.1853	0.156	0.2348	PTGR1	3.69e-55	0.016518	TRUE	244.72
rs76580987	T	C	T	C	0.2584	-0.1853	0.156	0.2348	PTGR1	3.69e-55	0.016518	TRUE	244.72
rs76580987	T	C	T	C	0.2584	-0.1853	0.156	0.2348	PTGR1	3.69e-55	0.016518	TRUE	244.72
rs28635450	A	T	A	T	-0.1416	0.1683	0.1388	0.2251	MICB	4.07e-12	0.020419	TRUE	48.0903
rs28635450	A	T	A	T	-0.1416	0.1683	0.1388	0.2251	MICB	4.07e-12	0.020419	TRUE	48.0903
rs28635450	A	T	A	T	-0.1416	0.1683	0.1388	0.2251	MICB	4.07e-12	0.020419	TRUE	48.0903
rs28635450	A	T	A	T	-0.1416	0.1683	0.1388	0.2251	MICB	4.07e-12	0.020419	TRUE	48.0903
rs28635450	A	T	A	T	-0.1416	0.1683	0.1388	0.2251	MICB	4.07e-12	0.020419	TRUE	48.0903
rs148477941	C	T	C	T	-0.1458	0.2767	0.2258	0.2204	CACNA2D3	4.8e-18	0.01684	TRUE	74.9602
rs148477941	C	T	C	T	-0.1458	0.2767	0.2258	0.2204	CACNA2D3	4.8e-18	0.01684	TRUE	74.9602
rs148477941	C	T	C	T	-0.1458	0.2767	0.2258	0.2204	CACNA2D3	4.8e-18	0.01684	TRUE	74.9602
rs148477941	C	T	C	T	-0.1458	0.2767	0.2258	0.2204	CACNA2D3	4.8e-18	0.01684	TRUE	74.9602
rs148477941	C	T	C	T	-0.1458	0.2767	0.2258	0.2204	CACNA2D3	4.8e-18	0.01684	TRUE	74.9602
rs181195900	A	G	A	G	0.1718	0.315	0.257	0.2204	MMP1	8.7e-19	0.019411	TRUE	78.334
rs181195900	A	G	A	G	0.1718	0.315	0.257	0.2204	MMP1	8.7e-19	0.019411	TRUE	78.334
rs181195900	A	G	A	G	0.1718	0.315	0.257	0.2204	MMP1	8.7e-19	0.019411	TRUE	78.334
rs181195900	A	G	A	G	0.1718	0.315	0.257	0.2204	MMP1	8.7e-19	0.019411	TRUE	78.334
rs181195900	A	G	A	G	0.1718	0.315	0.257	0.2204	MMP1	8.7e-19	0.019411	TRUE	78.334
rs635634	C	T	C	T	0.2302	0.125	0.1019	0.2199	SELP	4.67e-81	0.012073	TRUE	363.563
rs635634	C	T	C	T	0.2302	0.125	0.1019	0.2199	SELP	4.67e-81	0.012073	TRUE	363.563
rs635634	C	T	C	T	0.2302	0.125	0.1019	0.2199	SELP	4.67e-81	0.012073	TRUE	363.563
rs635634	C	T	C	T	0.2302	0.125	0.1019	0.2199	SELP	4.67e-81	0.012073	TRUE	363.563
rs635634	C	T	C	T	0.2302	0.125	0.1019	0.2199	SELP	4.67e-81	0.012073	TRUE	363.563
rs4970773	G	C	G	C	-0.5533	0.1084	0.087	0.2129	GSTM3	0	0.006966	TRUE	6308.91
rs4970773	G	C	G	C	-0.5533	0.1084	0.087	0.2129	GSTM3	0	0.006966	TRUE	6308.91
rs4970773	G	C	G	C	-0.5533	0.1084	0.087	0.2129	GSTM3	0	0.006966	TRUE	6308.91
rs4970773	G	C	G	C	-0.5533	0.1084	0.087	0.2129	GSTM3	0	0.006966	TRUE	6308.91
rs4970773	G	C	G	C	-0.5533	0.1084	0.087	0.2129	GSTM3	0	0.006966	TRUE	6308.91
rs35166255	A	G	A	G	0.1881	0.2778	0.222	0.2108	GFRAL	5.56e-20	0.020551	TRUE	83.7745
rs35166255	A	G	A	G	0.1881	0.2778	0.222	0.2108	GFRAL	5.56e-20	0.020551	TRUE	83.7745
rs35166255	A	G	A	G	0.1881	0.2778	0.222	0.2108	GFRAL	5.56e-20	0.020551	TRUE	83.7745
rs35166255	A	G	A	G	0.1881	0.2778	0.222	0.2108	GFRAL	5.56e-20	0.020551	TRUE	83.7745
rs35166255	A	G	A	G	0.1881	0.2778	0.222	0.2108	GFRAL	5.56e-20	0.020551	TRUE	83.7745
rs56278466	G	T	G	T	0.081	-0.1047	0.0832	0.2081	ADGRE2	5.79e-20	0.008854	TRUE	83.6934
rs56278466	G	T	G	T	0.081	-0.1047	0.0832	0.2081	ADGRE2	5.79e-20	0.008854	TRUE	83.6934
rs56278466	G	T	G	T	0.081	-0.1047	0.0832	0.2081	ADGRE2	5.79e-20	0.008854	TRUE	83.6934
rs56278466	G	T	G	T	0.081	-0.1047	0.0832	0.2081	ADGRE2	5.79e-20	0.008854	TRUE	83.6934
rs56278466	G	T	G	T	0.081	-0.1047	0.0832	0.2081	ADGRE2	5.79e-20	0.008854	TRUE	83.6934
rs28655879	T	C	T	C	-0.0626	-0.156	0.1217	0.2	GNPTG	8.85e-11	0.009652	TRUE	42.0643
rs28655879	T	C	T	C	-0.0626	-0.156	0.1217	0.2	GNPTG	8.85e-11	0.009652	TRUE	42.0643
rs28655879	T	C	T	C	-0.0626	-0.156	0.1217	0.2	GNPTG	8.85e-11	0.009652	TRUE	42.0643
rs28655879	T	C	T	C	-0.0626	-0.156	0.1217	0.2	GNPTG	8.85e-11	0.009652	TRUE	42.0643
rs28655879	T	C	T	C	-0.0626	-0.156	0.1217	0.2	GNPTG	8.85e-11	0.009652	TRUE	42.0643
rs77818036	C	G	C	G	0.3488	0.5725	0.4457	0.1989	PGP	3.29e-25	0.033626	TRUE	107.598
rs77818036	C	G	C	G	0.3488	0.5725	0.4457	0.1989	PGP	3.29e-25	0.033626	TRUE	107.598
rs77818036	C	G	C	G	0.3488	0.5725	0.4457	0.1989	PGP	3.29e-25	0.033626	TRUE	107.598
rs77818036	C	G	C	G	0.3488	0.5725	0.4457	0.1989	PGP	3.29e-25	0.033626	TRUE	107.598
rs77818036	C	G	C	G	0.3488	0.5725	0.4457	0.1989	PGP	3.29e-25	0.033626	TRUE	107.598
rs9302635	C	T	C	T	0.07	0.1374	0.1069	0.1986	HSPA5	1.42e-12	0.009884	TRUE	50.1569
rs9302635	C	T	C	T	0.07	0.1374	0.1069	0.1986	HSPA5	1.42e-12	0.009884	TRUE	50.1569
rs9302635	C	T	C	T	0.07	0.1374	0.1069	0.1986	HSPA5	1.42e-12	0.009884	TRUE	50.1569
rs9302635	C	T	C	T	0.07	0.1374	0.1069	0.1986	HSPA5	1.42e-12	0.009884	TRUE	50.1569
rs9302635	C	T	C	T	0.07	0.1374	0.1069	0.1986	HSPA5	1.42e-12	0.009884	TRUE	50.1569
rs17184514	G	T	G	T	-0.6281	-0.4795	0.373	0.1986	MICA	4.44e-100	0.029577	TRUE	450.972
rs17184514	G	T	G	T	-0.6281	-0.4795	0.373	0.1986	MICA	4.44e-100	0.029577	TRUE	450.972
rs17184514	G	T	G	T	-0.6281	-0.4795	0.373	0.1986	MICA	4.44e-100	0.029577	TRUE	450.972
rs17184514	G	T	G	T	-0.6281	-0.4795	0.373	0.1986	MICA	4.44e-100	0.029577	TRUE	450.972
rs17184514	G	T	G	T	-0.6281	-0.4795	0.373	0.1986	MICA	4.44e-100	0.029577	TRUE	450.972
rs8013143	G	A	G	A	0.0648	-0.1149	0.0888	0.1958	PSMB4	4.01e-12	0.009341	TRUE	48.1242
rs8013143	G	A	G	A	0.0648	-0.1149	0.0888	0.1958	PSMB4	4.01e-12	0.009341	TRUE	48.1242
rs8013143	G	A	G	A	0.0648	-0.1149	0.0888	0.1958	PSMB4	4.01e-12	0.009341	TRUE	48.1242
rs8013143	G	A	G	A	0.0648	-0.1149	0.0888	0.1958	PSMB4	4.01e-12	0.009341	TRUE	48.1242
rs8013143	G	A	G	A	0.0648	-0.1149	0.0888	0.1958	PSMB4	4.01e-12	0.009341	TRUE	48.1242
rs62248848	T	C	T	C	0.1146	-0.2454	0.1884	0.1927	POMGNT2	2.91e-22	0.01181	TRUE	94.1606
rs62248848	T	C	T	C	0.1146	-0.2454	0.1884	0.1927	POMGNT2	2.91e-22	0.01181	TRUE	94.1606
rs62248848	T	C	T	C	0.1146	-0.2454	0.1884	0.1927	POMGNT2	2.91e-22	0.01181	TRUE	94.1606
rs62248848	T	C	T	C	0.1146	-0.2454	0.1884	0.1927	POMGNT2	2.91e-22	0.01181	TRUE	94.1606
rs62248848	T	C	T	C	0.1146	-0.2454	0.1884	0.1927	POMGNT2	2.91e-22	0.01181	TRUE	94.1606
rs35044849	G	A	G	A	-0.6178	0.2555	0.196	0.1924	MICB	0	0.011391	TRUE	2941.52
rs35044849	G	A	G	A	-0.6178	0.2555	0.196	0.1924	MICB	0	0.011391	TRUE	2941.52
rs35044849	G	A	G	A	-0.6178	0.2555	0.196	0.1924	MICB	0	0.011391	TRUE	2941.52
rs35044849	G	A	G	A	-0.6178	0.2555	0.196	0.1924	MICB	0	0.011391	TRUE	2941.52
rs35044849	G	A	G	A	-0.6178	0.2555	0.196	0.1924	MICB	0	0.011391	TRUE	2941.52
rs9977504	C	G	C	G	0.0557	0.1111	0.085	0.1912	CACNA2D3	2.35e-11	0.008335	TRUE	44.658
rs9977504	C	G	C	G	0.0557	0.1111	0.085	0.1912	CACNA2D3	2.35e-11	0.008335	TRUE	44.658
rs9977504	C	G	C	G	0.0557	0.1111	0.085	0.1912	CACNA2D3	2.35e-11	0.008335	TRUE	44.658
rs9977504	C	G	C	G	0.0557	0.1111	0.085	0.1912	CACNA2D3	2.35e-11	0.008335	TRUE	44.658
rs9977504	C	G	C	G	0.0557	0.1111	0.085	0.1912	CACNA2D3	2.35e-11	0.008335	TRUE	44.658
rs74979599	G	A	G	A	0.0725	0.2148	0.1643	0.1912	PKLR	1.44e-08	0.01279	TRUE	32.1318
rs74979599	G	A	G	A	0.0725	0.2148	0.1643	0.1912	PKLR	1.44e-08	0.01279	TRUE	32.1318
rs74979599	G	A	G	A	0.0725	0.2148	0.1643	0.1912	PKLR	1.44e-08	0.01279	TRUE	32.1318
rs74979599	G	A	G	A	0.0725	0.2148	0.1643	0.1912	PKLR	1.44e-08	0.01279	TRUE	32.1318
rs74979599	G	A	G	A	0.0725	0.2148	0.1643	0.1912	PKLR	1.44e-08	0.01279	TRUE	32.1318
rs1081105	C	A	C	A	0.9642	-0.3777	0.2873	0.1886	LRRN1	5.5e-273	0.027313	TRUE	1246.22
rs1081105	C	A	C	A	0.9642	-0.3777	0.2873	0.1886	LRRN1	5.5e-273	0.027313	TRUE	1246.22
rs1081105	C	A	C	A	0.9642	-0.3777	0.2873	0.1886	LRRN1	5.5e-273	0.027313	TRUE	1246.22
rs1081105	C	A	C	A	0.9642	-0.3777	0.2873	0.1886	LRRN1	5.5e-273	0.027313	TRUE	1246.22
rs1081105	C	A	C	A	0.9642	-0.3777	0.2873	0.1886	LRRN1	5.5e-273	0.027313	TRUE	1246.22
rs470358	C	T	C	T	-0.1314	-0.1103	0.0836	0.1869	MMP1	8.38e-49	0.00895	TRUE	215.548
rs470358	C	T	C	T	-0.1314	-0.1103	0.0836	0.1869	MMP1	8.38e-49	0.00895	TRUE	215.548
rs470358	C	T	C	T	-0.1314	-0.1103	0.0836	0.1869	MMP1	8.38e-49	0.00895	TRUE	215.548
rs470358	C	T	C	T	-0.1314	-0.1103	0.0836	0.1869	MMP1	8.38e-49	0.00895	TRUE	215.548
rs470358	C	T	C	T	-0.1314	-0.1103	0.0836	0.1869	MMP1	8.38e-49	0.00895	TRUE	215.548
rs3825041	C	T	C	T	-0.224	-0.1973	0.149	0.1854	C5orf38	7.79e-40	0.016958	TRUE	174.48
rs3825041	C	T	C	T	-0.224	-0.1973	0.149	0.1854	C5orf38	7.79e-40	0.016958	TRUE	174.48
rs3825041	C	T	C	T	-0.224	-0.1973	0.149	0.1854	C5orf38	7.79e-40	0.016958	TRUE	174.48
rs3825041	C	T	C	T	-0.224	-0.1973	0.149	0.1854	C5orf38	7.79e-40	0.016958	TRUE	174.48
rs3825041	C	T	C	T	-0.224	-0.1973	0.149	0.1854	C5orf38	7.79e-40	0.016958	TRUE	174.48
rs78514778	A	G	A	G	0.2217	-0.5359	0.4046	0.1853	GFRAL	5.13e-09	0.037944	TRUE	34.1386
rs78514778	A	G	A	G	0.2217	-0.5359	0.4046	0.1853	GFRAL	5.13e-09	0.037944	TRUE	34.1386
rs78514778	A	G	A	G	0.2217	-0.5359	0.4046	0.1853	GFRAL	5.13e-09	0.037944	TRUE	34.1386
rs78514778	A	G	A	G	0.2217	-0.5359	0.4046	0.1853	GFRAL	5.13e-09	0.037944	TRUE	34.1386
rs78514778	A	G	A	G	0.2217	-0.5359	0.4046	0.1853	GFRAL	5.13e-09	0.037944	TRUE	34.1386
rs78415278	T	G	T	G	-0.1745	0.409	0.3086	0.1851	MREG	1.45e-12	0.024649	TRUE	50.1178
rs78415278	T	G	T	G	-0.1745	0.409	0.3086	0.1851	MREG	1.45e-12	0.024649	TRUE	50.1178
rs78415278	T	G	T	G	-0.1745	0.409	0.3086	0.1851	MREG	1.45e-12	0.024649	TRUE	50.1178
rs78415278	T	G	T	G	-0.1745	0.409	0.3086	0.1851	MREG	1.45e-12	0.024649	TRUE	50.1178
rs78415278	T	G	T	G	-0.1745	0.409	0.3086	0.1851	MREG	1.45e-12	0.024649	TRUE	50.1178
rs9932919	G	T	G	T	-0.1458	0.4337	0.3261	0.1836	HP	3.91e-12	0.021007	TRUE	48.1711
rs9932919	G	T	G	T	-0.1458	0.4337	0.3261	0.1836	HP	3.91e-12	0.021007	TRUE	48.1711
rs9932919	G	T	G	T	-0.1458	0.4337	0.3261	0.1836	HP	3.91e-12	0.021007	TRUE	48.1711
rs9932919	G	T	G	T	-0.1458	0.4337	0.3261	0.1836	HP	3.91e-12	0.021007	TRUE	48.1711
rs9932919	G	T	G	T	-0.1458	0.4337	0.3261	0.1836	HP	3.91e-12	0.021007	TRUE	48.1711
rs3826759	C	G	C	G	-0.2776	0.1815	0.1364	0.1833	ADGRE2	3.14e-139	0.011052	TRUE	630.895
rs3826759	C	G	C	G	-0.2776	0.1815	0.1364	0.1833	ADGRE2	3.14e-139	0.011052	TRUE	630.895
rs3826759	C	G	C	G	-0.2776	0.1815	0.1364	0.1833	ADGRE2	3.14e-139	0.011052	TRUE	630.895
rs3826759	C	G	C	G	-0.2776	0.1815	0.1364	0.1833	ADGRE2	3.14e-139	0.011052	TRUE	630.895
rs3826759	C	G	C	G	-0.2776	0.1815	0.1364	0.1833	ADGRE2	3.14e-139	0.011052	TRUE	630.895
rs61121205	G	C	G	C	0.0531	0.1293	0.0969	0.1824	PSMB9	5.61e-10	0.008563	TRUE	38.4536
rs61121205	G	C	G	C	0.0531	0.1293	0.0969	0.1824	PSMB9	5.61e-10	0.008563	TRUE	38.4536
rs61121205	G	C	G	C	0.0531	0.1293	0.0969	0.1824	PSMB9	5.61e-10	0.008563	TRUE	38.4536
rs61121205	G	C	G	C	0.0531	0.1293	0.0969	0.1824	PSMB9	5.61e-10	0.008563	TRUE	38.4536
rs61121205	G	C	G	C	0.0531	0.1293	0.0969	0.1824	PSMB9	5.61e-10	0.008563	TRUE	38.4536
rs35600854	A	T	A	T	-1.0164	0.5705	0.4257	0.1802	HP	1.59e-95	0.049013	TRUE	430.038
rs35600854	A	T	A	T	-1.0164	0.5705	0.4257	0.1802	HP	1.59e-95	0.049013	TRUE	430.038
rs35600854	A	T	A	T	-1.0164	0.5705	0.4257	0.1802	HP	1.59e-95	0.049013	TRUE	430.038
rs35600854	A	T	A	T	-1.0164	0.5705	0.4257	0.1802	HP	1.59e-95	0.049013	TRUE	430.038
rs35600854	A	T	A	T	-1.0164	0.5705	0.4257	0.1802	HP	1.59e-95	0.049013	TRUE	430.038
rs73213590	A	G	A	G	0.228	-0.3052	0.226	0.1769	SSU72	6.11e-24	0.022596	TRUE	101.814
rs73213590	A	G	A	G	0.228	-0.3052	0.226	0.1769	SSU72	6.11e-24	0.022596	TRUE	101.814
rs73213590	A	G	A	G	0.228	-0.3052	0.226	0.1769	SSU72	6.11e-24	0.022596	TRUE	101.814
rs73213590	A	G	A	G	0.228	-0.3052	0.226	0.1769	SSU72	6.11e-24	0.022596	TRUE	101.814
rs73213590	A	G	A	G	0.228	-0.3052	0.226	0.1769	SSU72	6.11e-24	0.022596	TRUE	101.814
rs112369494	T	C	T	C	0.0718	-0.1139	0.0835	0.1727	NCAN	4.46e-15	0.009157	TRUE	61.4812
rs112369494	T	C	T	C	0.0718	-0.1139	0.0835	0.1727	NCAN	4.46e-15	0.009157	TRUE	61.4812
rs112369494	T	C	T	C	0.0718	-0.1139	0.0835	0.1727	NCAN	4.46e-15	0.009157	TRUE	61.4812
rs112369494	T	C	T	C	0.0718	-0.1139	0.0835	0.1727	NCAN	4.46e-15	0.009157	TRUE	61.4812
rs112369494	T	C	T	C	0.0718	-0.1139	0.0835	0.1727	NCAN	4.46e-15	0.009157	TRUE	61.4812
rs2229475	T	C	T	C	0.5138	-0.2662	0.1939	0.1698	HSPG2	2.28e-191	0.017412	TRUE	870.745
rs2229475	T	C	T	C	0.5138	-0.2662	0.1939	0.1698	HSPG2	2.28e-191	0.017412	TRUE	870.745
rs2229475	T	C	T	C	0.5138	-0.2662	0.1939	0.1698	HSPG2	2.28e-191	0.017412	TRUE	870.745
rs2229475	T	C	T	C	0.5138	-0.2662	0.1939	0.1698	HSPG2	2.28e-191	0.017412	TRUE	870.745
rs2229475	T	C	T	C	0.5138	-0.2662	0.1939	0.1698	HSPG2	2.28e-191	0.017412	TRUE	870.745
rs10889353	C	A	C	A	-0.0595	0.1275	0.0926	0.1686	C5orf38	4.1e-11	0.009015	TRUE	43.5615
rs10889353	C	A	C	A	-0.0595	0.1275	0.0926	0.1686	C5orf38	4.1e-11	0.009015	TRUE	43.5615
rs10889353	C	A	C	A	-0.0595	0.1275	0.0926	0.1686	C5orf38	4.1e-11	0.009015	TRUE	43.5615
rs10889353	C	A	C	A	-0.0595	0.1275	0.0926	0.1686	C5orf38	4.1e-11	0.009015	TRUE	43.5615
rs10889353	C	A	C	A	-0.0595	0.1275	0.0926	0.1686	C5orf38	4.1e-11	0.009015	TRUE	43.5615
rs4149056	C	T	C	T	-0.0626	-0.1399	0.1014	0.1677	LGALS3BP	3.18e-08	0.011317	TRUE	30.5975
rs4149056	C	T	C	T	-0.0626	-0.1399	0.1014	0.1677	LGALS3BP	3.18e-08	0.011317	TRUE	30.5975
rs4149056	C	T	C	T	-0.0626	-0.1399	0.1014	0.1677	LGALS3BP	3.18e-08	0.011317	TRUE	30.5975
rs4149056	C	T	C	T	-0.0626	-0.1399	0.1014	0.1677	LGALS3BP	3.18e-08	0.011317	TRUE	30.5975
rs4149056	C	T	C	T	-0.0626	-0.1399	0.1014	0.1677	LGALS3BP	3.18e-08	0.011317	TRUE	30.5975
rs12691088	A	G	A	G	-0.6697	-0.3171	0.2284	0.1651	PHGDH	3.15e-256	0.019586	TRUE	1169.15
rs12691088	A	G	A	G	-0.6697	-0.3171	0.2284	0.1651	PHGDH	3.15e-256	0.019586	TRUE	1169.15
rs12691088	A	G	A	G	-0.6697	-0.3171	0.2284	0.1651	PHGDH	3.15e-256	0.019586	TRUE	1169.15
rs12691088	A	G	A	G	-0.6697	-0.3171	0.2284	0.1651	PHGDH	3.15e-256	0.019586	TRUE	1169.15
rs12691088	A	G	A	G	-0.6697	-0.3171	0.2284	0.1651	PHGDH	3.15e-256	0.019586	TRUE	1169.15
rs12691088	A	G	A	G	-0.3843	-0.3171	0.2284	0.1651	VPS29	6.99e-82	0.02005	TRUE	367.377
rs12691088	A	G	A	G	-0.3843	-0.3171	0.2284	0.1651	VPS29	6.99e-82	0.02005	TRUE	367.377
rs12691088	A	G	A	G	-0.3843	-0.3171	0.2284	0.1651	VPS29	6.99e-82	0.02005	TRUE	367.377
rs12691088	A	G	A	G	-0.3843	-0.3171	0.2284	0.1651	VPS29	6.99e-82	0.02005	TRUE	367.377
rs12691088	A	G	A	G	-0.3843	-0.3171	0.2284	0.1651	VPS29	6.99e-82	0.02005	TRUE	367.377
rs41341749	G	A	G	A	0.6056	0.2149	0.1546	0.1645	CCL23	3.03e-166	0.022038	TRUE	755.14
rs41341749	G	A	G	A	0.6056	0.2149	0.1546	0.1645	CCL23	3.03e-166	0.022038	TRUE	755.14
rs41341749	G	A	G	A	0.6056	0.2149	0.1546	0.1645	CCL23	3.03e-166	0.022038	TRUE	755.14
rs41341749	G	A	G	A	0.6056	0.2149	0.1546	0.1645	CCL23	3.03e-166	0.022038	TRUE	755.14
rs41341749	G	A	G	A	0.6056	0.2149	0.1546	0.1645	CCL23	3.03e-166	0.022038	TRUE	755.14
rs117627558	G	A	G	A	-0.8438	-0.2997	0.215	0.1634	CCL23	5.72e-97	0.040379	TRUE	436.685
rs117627558	G	A	G	A	-0.6975	-0.2997	0.215	0.1634	CCL23	1.5e-66	0.040475	TRUE	296.971
rs117627558	G	A	G	A	-0.8438	-0.2997	0.215	0.1634	CCL23	5.72e-97	0.040379	TRUE	436.685
rs117627558	G	A	G	A	-0.6975	-0.2997	0.215	0.1634	CCL23	1.5e-66	0.040475	TRUE	296.971
rs117627558	G	A	G	A	-0.8438	-0.2997	0.215	0.1634	CCL23	5.72e-97	0.040379	TRUE	436.685
rs117627558	G	A	G	A	-0.6975	-0.2997	0.215	0.1634	CCL23	1.5e-66	0.040475	TRUE	296.971
rs117627558	G	A	G	A	-0.8438	-0.2997	0.215	0.1634	CCL23	5.72e-97	0.040379	TRUE	436.685
rs117627558	G	A	G	A	-0.6975	-0.2997	0.215	0.1634	CCL23	1.5e-66	0.040475	TRUE	296.971
rs117627558	G	A	G	A	-0.8438	-0.2997	0.215	0.1634	CCL23	5.72e-97	0.040379	TRUE	436.685
rs117627558	G	A	G	A	-0.6975	-0.2997	0.215	0.1634	CCL23	1.5e-66	0.040475	TRUE	296.971
rs111072793	A	C	A	C	0.0924	-0.1318	0.094	0.1607	ADGRE2	3.86e-19	0.010334	TRUE	79.9479
rs111072793	A	C	A	C	0.0924	-0.1318	0.094	0.1607	ADGRE2	3.86e-19	0.010334	TRUE	79.9479
rs111072793	A	C	A	C	0.0924	-0.1318	0.094	0.1607	ADGRE2	3.86e-19	0.010334	TRUE	79.9479
rs111072793	A	C	A	C	0.0924	-0.1318	0.094	0.1607	ADGRE2	3.86e-19	0.010334	TRUE	79.9479
rs111072793	A	C	A	C	0.0924	-0.1318	0.094	0.1607	ADGRE2	3.86e-19	0.010334	TRUE	79.9479
rs111072793	A	C	A	C	0.0673	-0.1318	0.094	0.1607	HSPG2	5.23e-11	0.010253	TRUE	43.0852
rs111072793	A	C	A	C	0.0673	-0.1318	0.094	0.1607	HSPG2	5.23e-11	0.010253	TRUE	43.0852
rs111072793	A	C	A	C	0.0673	-0.1318	0.094	0.1607	HSPG2	5.23e-11	0.010253	TRUE	43.0852
rs111072793	A	C	A	C	0.0673	-0.1318	0.094	0.1607	HSPG2	5.23e-11	0.010253	TRUE	43.0852
rs111072793	A	C	A	C	0.0673	-0.1318	0.094	0.1607	HSPG2	5.23e-11	0.010253	TRUE	43.0852
rs17349460	G	A	G	A	-0.2493	-0.2208	0.157	0.1595	SELP	5.67e-35	0.020206	TRUE	152.224
rs17349460	G	A	G	A	-0.2493	-0.2208	0.157	0.1595	SELP	5.67e-35	0.020206	TRUE	152.224
rs17349460	G	A	G	A	-0.2493	-0.2208	0.157	0.1595	SELP	5.67e-35	0.020206	TRUE	152.224
rs17349460	G	A	G	A	-0.2493	-0.2208	0.157	0.1595	SELP	5.67e-35	0.020206	TRUE	152.224
rs17349460	G	A	G	A	-0.2493	-0.2208	0.157	0.1595	SELP	5.67e-35	0.020206	TRUE	152.224
rs11720167	G	T	G	T	0.069	-0.1521	0.1074	0.1568	PSMB9	7.14e-12	0.010066	TRUE	46.9877
rs11720167	G	T	G	T	0.069	-0.1521	0.1074	0.1568	PSMB9	7.14e-12	0.010066	TRUE	46.9877
rs11720167	G	T	G	T	0.069	-0.1521	0.1074	0.1568	PSMB9	7.14e-12	0.010066	TRUE	46.9877
rs11720167	G	T	G	T	0.069	-0.1521	0.1074	0.1568	PSMB9	7.14e-12	0.010066	TRUE	46.9877
rs11720167	G	T	G	T	0.069	-0.1521	0.1074	0.1568	PSMB9	7.14e-12	0.010066	TRUE	46.9877
rs75221179	C	T	C	T	0.1112	0.4193	0.295	0.1551	HN1	3.73e-10	0.017749	TRUE	39.252
rs75221179	C	T	C	T	0.1112	0.4193	0.295	0.1551	HN1	3.73e-10	0.017749	TRUE	39.252
rs75221179	C	T	C	T	0.1112	0.4193	0.295	0.1551	HN1	3.73e-10	0.017749	TRUE	39.252
rs75221179	C	T	C	T	0.1112	0.4193	0.295	0.1551	HN1	3.73e-10	0.017749	TRUE	39.252
rs75221179	C	T	C	T	0.1112	0.4193	0.295	0.1551	HN1	3.73e-10	0.017749	TRUE	39.252
rs6445035	A	G	A	G	0.0577	-0.1543	0.107	0.1492	NPFF	1.31e-08	0.010149	TRUE	32.3225
rs6445035	A	G	A	G	0.0577	-0.1543	0.107	0.1492	NPFF	1.31e-08	0.010149	TRUE	32.3225
rs6445035	A	G	A	G	0.0577	-0.1543	0.107	0.1492	NPFF	1.31e-08	0.010149	TRUE	32.3225
rs6445035	A	G	A	G	0.0577	-0.1543	0.107	0.1492	NPFF	1.31e-08	0.010149	TRUE	32.3225
rs6445035	A	G	A	G	0.0577	-0.1543	0.107	0.1492	NPFF	1.31e-08	0.010149	TRUE	32.3225
rs12378537	T	C	T	C	0.0782	0.1678	0.1162	0.1485	MICA	1.69e-10	0.012243	TRUE	40.7979
rs12378537	T	C	T	C	0.0782	0.1678	0.1162	0.1485	MICA	1.69e-10	0.012243	TRUE	40.7979
rs12378537	T	C	T	C	0.0782	0.1678	0.1162	0.1485	MICA	1.69e-10	0.012243	TRUE	40.7979
rs12378537	T	C	T	C	0.0782	0.1678	0.1162	0.1485	MICA	1.69e-10	0.012243	TRUE	40.7979
rs12378537	T	C	T	C	0.0782	0.1678	0.1162	0.1485	MICA	1.69e-10	0.012243	TRUE	40.7979
rs115889365	A	G	A	G	-0.6697	-0.2531	0.1741	0.1461	MICA	7.56e-60	0.041045	TRUE	266.22
rs115889365	A	G	A	G	-0.6697	-0.2531	0.1741	0.1461	MICA	7.56e-60	0.041045	TRUE	266.22
rs115889365	A	G	A	G	-0.6697	-0.2531	0.1741	0.1461	MICA	7.56e-60	0.041045	TRUE	266.22
rs115889365	A	G	A	G	-0.6697	-0.2531	0.1741	0.1461	MICA	7.56e-60	0.041045	TRUE	266.22
rs115889365	A	G	A	G	-0.6697	-0.2531	0.1741	0.1461	MICA	7.56e-60	0.041045	TRUE	266.22
rs431001	G	A	G	A	0.3593	0.1202	0.0825	0.1452	LILRA5	0	0.006985	TRUE	2645.95
rs431001	G	A	G	A	0.4664	0.1202	0.0825	0.1452	LILRA5	0	0.006891	TRUE	4580.92
rs431001	G	A	G	A	0.3593	0.1202	0.0825	0.1452	LILRA5	0	0.006985	TRUE	2645.95
rs431001	G	A	G	A	0.4664	0.1202	0.0825	0.1452	LILRA5	0	0.006891	TRUE	4580.92
rs431001	G	A	G	A	0.3593	0.1202	0.0825	0.1452	LILRA5	0	0.006985	TRUE	2645.95
rs431001	G	A	G	A	0.4664	0.1202	0.0825	0.1452	LILRA5	0	0.006891	TRUE	4580.92
rs431001	G	A	G	A	0.3593	0.1202	0.0825	0.1452	LILRA5	0	0.006985	TRUE	2645.95
rs431001	G	A	G	A	0.4664	0.1202	0.0825	0.1452	LILRA5	0	0.006891	TRUE	4580.92
rs431001	G	A	G	A	0.3593	0.1202	0.0825	0.1452	LILRA5	0	0.006985	TRUE	2645.95
rs431001	G	A	G	A	0.4664	0.1202	0.0825	0.1452	LILRA5	0	0.006891	TRUE	4580.92
rs148405974	A	G	A	G	-0.2565	0.7287	0.4985	0.1438	MICB	1.61e-16	0.031099	TRUE	68.0271
rs148405974	A	G	A	G	-0.2565	0.7287	0.4985	0.1438	MICB	1.61e-16	0.031099	TRUE	68.0271
rs148405974	A	G	A	G	-0.2565	0.7287	0.4985	0.1438	MICB	1.61e-16	0.031099	TRUE	68.0271
rs148405974	A	G	A	G	-0.2565	0.7287	0.4985	0.1438	MICB	1.61e-16	0.031099	TRUE	68.0271
rs148405974	A	G	A	G	-0.2565	0.7287	0.4985	0.1438	MICB	1.61e-16	0.031099	TRUE	68.0271
rs55642707	A	G	A	G	-0.2311	0.1568	0.1072	0.1437	MICB	1.43e-122	0.009815	TRUE	554.395
rs55642707	A	G	A	G	-0.2311	0.1568	0.1072	0.1437	MICB	1.43e-122	0.009815	TRUE	554.395
rs55642707	A	G	A	G	-0.2311	0.1568	0.1072	0.1437	MICB	1.43e-122	0.009815	TRUE	554.395
rs55642707	A	G	A	G	-0.2311	0.1568	0.1072	0.1437	MICB	1.43e-122	0.009815	TRUE	554.395
rs55642707	A	G	A	G	-0.2311	0.1568	0.1072	0.1437	MICB	1.43e-122	0.009815	TRUE	554.395
rs1160983	A	G	A	G	1.1771	0.4157	0.2842	0.1436	PHGDH	8.56e-268	0.033668	TRUE	1222.34
rs1160983	A	G	A	G	1.1771	0.4157	0.2842	0.1436	PHGDH	8.56e-268	0.033668	TRUE	1222.34
rs1160983	A	G	A	G	1.1771	0.4157	0.2842	0.1436	PHGDH	8.56e-268	0.033668	TRUE	1222.34
rs1160983	A	G	A	G	1.1771	0.4157	0.2842	0.1436	PHGDH	8.56e-268	0.033668	TRUE	1222.34
rs1160983	A	G	A	G	1.1771	0.4157	0.2842	0.1436	PHGDH	8.56e-268	0.033668	TRUE	1222.34
rs755240	G	T	G	T	0.2918	-0.3506	0.2391	0.1425	LGALS3BP	2.31e-25	0.028039	TRUE	108.304
rs755240	G	T	G	T	0.2918	-0.3506	0.2391	0.1425	LGALS3BP	2.31e-25	0.028039	TRUE	108.304
rs755240	G	T	G	T	0.2918	-0.3506	0.2391	0.1425	LGALS3BP	2.31e-25	0.028039	TRUE	108.304
rs755240	G	T	G	T	0.2918	-0.3506	0.2391	0.1425	LGALS3BP	2.31e-25	0.028039	TRUE	108.304
rs755240	G	T	G	T	0.2918	-0.3506	0.2391	0.1425	LGALS3BP	2.31e-25	0.028039	TRUE	108.304
rs9932707	C	A	C	A	-0.3298	0.1205	0.0821	0.1424	HP	0	0.005581	TRUE	3492.02
rs9932707	C	A	C	A	-0.3298	0.1205	0.0821	0.1424	HP	0	0.005581	TRUE	3492.02
rs9932707	C	A	C	A	-0.3298	0.1205	0.0821	0.1424	HP	0	0.005581	TRUE	3492.02
rs9932707	C	A	C	A	-0.3298	0.1205	0.0821	0.1424	HP	0	0.005581	TRUE	3492.02
rs9932707	C	A	C	A	-0.3298	0.1205	0.0821	0.1424	HP	0	0.005581	TRUE	3492.02
rs12767683	A	C	A	C	-0.0611	0.1306	0.089	0.1424	MMP1	3.94e-11	0.009249	TRUE	43.6408
rs12767683	A	C	A	C	-0.0611	0.1306	0.089	0.1424	MMP1	3.94e-11	0.009249	TRUE	43.6408
rs12767683	A	C	A	C	-0.0611	0.1306	0.089	0.1424	MMP1	3.94e-11	0.009249	TRUE	43.6408
rs12767683	A	C	A	C	-0.0611	0.1306	0.089	0.1424	MMP1	3.94e-11	0.009249	TRUE	43.6408
rs12767683	A	C	A	C	-0.0611	0.1306	0.089	0.1424	MMP1	3.94e-11	0.009249	TRUE	43.6408
rs79941266	C	A	C	A	-0.081	-0.2036	0.1381	0.1403	CACNA2D3	6.59e-10	0.013116	TRUE	38.1388
rs79941266	C	A	C	A	-0.081	-0.2036	0.1381	0.1403	CACNA2D3	6.59e-10	0.013116	TRUE	38.1388
rs79941266	C	A	C	A	-0.081	-0.2036	0.1381	0.1403	CACNA2D3	6.59e-10	0.013116	TRUE	38.1388
rs79941266	C	A	C	A	-0.081	-0.2036	0.1381	0.1403	CACNA2D3	6.59e-10	0.013116	TRUE	38.1388
rs79941266	C	A	C	A	-0.081	-0.2036	0.1381	0.1403	CACNA2D3	6.59e-10	0.013116	TRUE	38.1388
rs73027810	T	C	T	C	0.1222	-0.4349	0.2942	0.1394	NPTX1	4.47e-08	0.022336	TRUE	29.9317
rs73027810	T	C	T	C	0.1222	-0.4349	0.2942	0.1394	NPTX1	4.47e-08	0.022336	TRUE	29.9317
rs73027810	T	C	T	C	0.1222	-0.4349	0.2942	0.1394	NPTX1	4.47e-08	0.022336	TRUE	29.9317
rs73027810	T	C	T	C	0.1222	-0.4349	0.2942	0.1394	NPTX1	4.47e-08	0.022336	TRUE	29.9317
rs73027810	T	C	T	C	0.1222	-0.4349	0.2942	0.1394	NPTX1	4.47e-08	0.022336	TRUE	29.9317
rs78028520	G	T	G	T	0.1157	-0.3404	0.2298	0.1385	GLUL	1.16e-10	0.017953	TRUE	41.5329
rs78028520	G	T	G	T	0.1157	-0.3404	0.2298	0.1385	GLUL	1.16e-10	0.017953	TRUE	41.5329
rs78028520	G	T	G	T	0.1157	-0.3404	0.2298	0.1385	GLUL	1.16e-10	0.017953	TRUE	41.5329
rs78028520	G	T	G	T	0.1157	-0.3404	0.2298	0.1385	GLUL	1.16e-10	0.017953	TRUE	41.5329
rs78028520	G	T	G	T	0.1157	-0.3404	0.2298	0.1385	GLUL	1.16e-10	0.017953	TRUE	41.5329
rs10980797	G	A	G	A	-0.0632	-0.121	0.0815	0.1374	LILRA5	5.39e-14	0.008402	TRUE	56.5808
rs10980797	G	A	G	A	-0.0632	-0.121	0.0815	0.1374	LILRA5	5.39e-14	0.008402	TRUE	56.5808
rs10980797	G	A	G	A	-0.0632	-0.121	0.0815	0.1374	LILRA5	5.39e-14	0.008402	TRUE	56.5808
rs10980797	G	A	G	A	-0.0632	-0.121	0.0815	0.1374	LILRA5	5.39e-14	0.008402	TRUE	56.5808
rs10980797	G	A	G	A	-0.0632	-0.121	0.0815	0.1374	LILRA5	5.39e-14	0.008402	TRUE	56.5808
rs7719473	A	C	A	C	-0.892	0.2608	0.1754	0.137	SPINK6	0	0.019261	TRUE	2144.73
rs7719473	A	C	A	C	-0.892	0.2608	0.1754	0.137	SPINK6	0	0.019261	TRUE	2144.73
rs7719473	A	C	A	C	-0.892	0.2608	0.1754	0.137	SPINK6	0	0.019261	TRUE	2144.73
rs7719473	A	C	A	C	-0.892	0.2608	0.1754	0.137	SPINK6	0	0.019261	TRUE	2144.73
rs7719473	A	C	A	C	-0.892	0.2608	0.1754	0.137	SPINK6	0	0.019261	TRUE	2144.73
rs4149000	T	C	T	C	-0.0648	-0.161	0.1081	0.1364	HSPA5	1.46e-08	0.011436	TRUE	32.1071
rs4149000	T	C	T	C	-0.0648	-0.161	0.1081	0.1364	HSPA5	1.46e-08	0.011436	TRUE	32.1071
rs4149000	T	C	T	C	-0.0648	-0.161	0.1081	0.1364	HSPA5	1.46e-08	0.011436	TRUE	32.1071
rs4149000	T	C	T	C	-0.0648	-0.161	0.1081	0.1364	HSPA5	1.46e-08	0.011436	TRUE	32.1071
rs4149000	T	C	T	C	-0.0648	-0.161	0.1081	0.1364	HSPA5	1.46e-08	0.011436	TRUE	32.1071
rs6793992	G	T	G	T	0.0918	-0.1741	0.1168	0.136	TMPRSS11D	1.02e-13	0.012341	TRUE	55.3331
rs6793992	G	T	G	T	0.0918	-0.1741	0.1168	0.136	TMPRSS11D	1.02e-13	0.012341	TRUE	55.3331
rs6793992	G	T	G	T	0.0918	-0.1741	0.1168	0.136	TMPRSS11D	1.02e-13	0.012341	TRUE	55.3331
rs6793992	G	T	G	T	0.0918	-0.1741	0.1168	0.136	TMPRSS11D	1.02e-13	0.012341	TRUE	55.3331
rs6793992	G	T	G	T	0.0918	-0.1741	0.1168	0.136	TMPRSS11D	1.02e-13	0.012341	TRUE	55.3331
rs6537279	G	A	G	A	-0.0779	-0.1567	0.1035	0.1301	POMGNT2	1.21e-15	0.009733	TRUE	64.0592
rs6537279	G	A	G	A	-0.0779	-0.1567	0.1035	0.1301	POMGNT2	1.21e-15	0.009733	TRUE	64.0592
rs6537279	G	A	G	A	-0.0779	-0.1567	0.1035	0.1301	POMGNT2	1.21e-15	0.009733	TRUE	64.0592
rs6537279	G	A	G	A	-0.0779	-0.1567	0.1035	0.1301	POMGNT2	1.21e-15	0.009733	TRUE	64.0592
rs6537279	G	A	G	A	-0.0779	-0.1567	0.1035	0.1301	POMGNT2	1.21e-15	0.009733	TRUE	64.0592
rs10908505	A	T	A	T	0.0885	-0.1251	0.0821	0.1277	MMP1	8.91e-26	0.008431	TRUE	110.186
rs10908505	A	T	A	T	0.0885	-0.1251	0.0821	0.1277	MMP1	8.91e-26	0.008431	TRUE	110.186
rs10908505	A	T	A	T	0.0885	-0.1251	0.0821	0.1277	MMP1	8.91e-26	0.008431	TRUE	110.186
rs10908505	A	T	A	T	0.0885	-0.1251	0.0821	0.1277	MMP1	8.91e-26	0.008431	TRUE	110.186
rs10908505	A	T	A	T	0.0885	-0.1251	0.0821	0.1277	MMP1	8.91e-26	0.008431	TRUE	110.186
rs28522560	T	C	T	C	-0.277	0.1333	0.0863	0.1226	POMGNT2	2.85e-215	0.008845	TRUE	980.763
rs28522560	T	C	T	C	-0.277	0.1333	0.0863	0.1226	POMGNT2	2.85e-215	0.008845	TRUE	980.763
rs28522560	T	C	T	C	-0.277	0.1333	0.0863	0.1226	POMGNT2	2.85e-215	0.008845	TRUE	980.763
rs28522560	T	C	T	C	-0.277	0.1333	0.0863	0.1226	POMGNT2	2.85e-215	0.008845	TRUE	980.763
rs28522560	T	C	T	C	-0.277	0.1333	0.0863	0.1226	POMGNT2	2.85e-215	0.008845	TRUE	980.763
rs7470777	G	A	G	A	0.1487	0.1893	0.1222	0.1212	LGALS3BP	1.3e-16	0.017972	TRUE	68.4588
rs7470777	G	A	G	A	0.1487	0.1893	0.1222	0.1212	LGALS3BP	1.3e-16	0.017972	TRUE	68.4588
rs7470777	G	A	G	A	0.1487	0.1893	0.1222	0.1212	LGALS3BP	1.3e-16	0.017972	TRUE	68.4588
rs7470777	G	A	G	A	0.1487	0.1893	0.1222	0.1212	LGALS3BP	1.3e-16	0.017972	TRUE	68.4588
rs7470777	G	A	G	A	0.1487	0.1893	0.1222	0.1212	LGALS3BP	1.3e-16	0.017972	TRUE	68.4588
rs7470777	G	A	G	A	0.1067	0.1893	0.1222	0.1212	MICB	3.34e-11	0.016092	TRUE	43.9652
rs7470777	G	A	G	A	0.1067	0.1893	0.1222	0.1212	MICB	3.34e-11	0.016092	TRUE	43.9652
rs7470777	G	A	G	A	0.1067	0.1893	0.1222	0.1212	MICB	3.34e-11	0.016092	TRUE	43.9652
rs7470777	G	A	G	A	0.1067	0.1893	0.1222	0.1212	MICB	3.34e-11	0.016092	TRUE	43.9652
rs7470777	G	A	G	A	0.1067	0.1893	0.1222	0.1212	MICB	3.34e-11	0.016092	TRUE	43.9652
rs6676659	A	G	A	G	0.1504	-0.1439	0.0928	0.121	GSTM3	4.56e-54	0.009714	TRUE	239.717
rs6676659	A	G	A	G	0.1504	-0.1439	0.0928	0.121	GSTM3	4.56e-54	0.009714	TRUE	239.717
rs6676659	A	G	A	G	0.1504	-0.1439	0.0928	0.121	GSTM3	4.56e-54	0.009714	TRUE	239.717
rs6676659	A	G	A	G	0.1504	-0.1439	0.0928	0.121	GSTM3	4.56e-54	0.009714	TRUE	239.717
rs6676659	A	G	A	G	0.1504	-0.1439	0.0928	0.121	GSTM3	4.56e-54	0.009714	TRUE	239.717
rs182826550	T	C	T	C	-0.1134	-0.2398	0.1545	0.1207	POMGNT2	1.25e-13	0.0153	TRUE	54.9343
rs182826550	T	C	T	C	-0.1134	-0.2398	0.1545	0.1207	POMGNT2	1.25e-13	0.0153	TRUE	54.9343
rs182826550	T	C	T	C	-0.1134	-0.2398	0.1545	0.1207	POMGNT2	1.25e-13	0.0153	TRUE	54.9343
rs182826550	T	C	T	C	-0.1134	-0.2398	0.1545	0.1207	POMGNT2	1.25e-13	0.0153	TRUE	54.9343
rs182826550	T	C	T	C	-0.1134	-0.2398	0.1545	0.1207	POMGNT2	1.25e-13	0.0153	TRUE	54.9343
rs118170342	C	T	C	T	-0.271	-0.3291	0.2107	0.1182	VPS29	8.93e-35	0.022031	TRUE	151.311
rs118170342	C	T	C	T	-0.271	-0.3291	0.2107	0.1182	VPS29	8.93e-35	0.022031	TRUE	151.311
rs118170342	C	T	C	T	-0.271	-0.3291	0.2107	0.1182	VPS29	8.93e-35	0.022031	TRUE	151.311
rs118170342	C	T	C	T	-0.271	-0.3291	0.2107	0.1182	VPS29	8.93e-35	0.022031	TRUE	151.311
rs118170342	C	T	C	T	-0.271	-0.3291	0.2107	0.1182	VPS29	8.93e-35	0.022031	TRUE	151.311
rs142504786	C	T	C	T	-0.1167	-0.5083	0.3212	0.1136	HP	9.7e-09	0.020346	TRUE	32.8991
rs142504786	C	T	C	T	-0.1167	-0.5083	0.3212	0.1136	HP	9.7e-09	0.020346	TRUE	32.8991
rs142504786	C	T	C	T	-0.1167	-0.5083	0.3212	0.1136	HP	9.7e-09	0.020346	TRUE	32.8991
rs142504786	C	T	C	T	-0.1167	-0.5083	0.3212	0.1136	HP	9.7e-09	0.020346	TRUE	32.8991
rs142504786	C	T	C	T	-0.1167	-0.5083	0.3212	0.1136	HP	9.7e-09	0.020346	TRUE	32.8991
rs182084676	A	G	A	G	0.2147	-0.3455	0.217	0.1113	GSTM3	6.2e-09	0.036945	TRUE	33.7717
rs182084676	A	G	A	G	0.2147	-0.3455	0.217	0.1113	GSTM3	6.2e-09	0.036945	TRUE	33.7717
rs182084676	A	G	A	G	0.2147	-0.3455	0.217	0.1113	GSTM3	6.2e-09	0.036945	TRUE	33.7717
rs182084676	A	G	A	G	0.2147	-0.3455	0.217	0.1113	GSTM3	6.2e-09	0.036945	TRUE	33.7717
rs182084676	A	G	A	G	0.2147	-0.3455	0.217	0.1113	GSTM3	6.2e-09	0.036945	TRUE	33.7717
rs143968847	T	G	T	G	-0.7172	0.4964	0.3111	0.1107	PTGR1	7.77e-130	0.029583	TRUE	587.755
rs143968847	T	G	T	G	-0.7172	0.4964	0.3111	0.1107	PTGR1	7.77e-130	0.029583	TRUE	587.755
rs143968847	T	G	T	G	-0.7172	0.4964	0.3111	0.1107	PTGR1	7.77e-130	0.029583	TRUE	587.755
rs143968847	T	G	T	G	-0.7172	0.4964	0.3111	0.1107	PTGR1	7.77e-130	0.029583	TRUE	587.755
rs143968847	T	G	T	G	-0.7172	0.4964	0.3111	0.1107	PTGR1	7.77e-130	0.029583	TRUE	587.755
rs139120114	C	T	C	T	-0.8142	0.6988	0.4381	0.1106	SPINK6	2.53e-113	0.035989	TRUE	511.826
rs139120114	C	T	C	T	-0.8142	0.6988	0.4381	0.1106	SPINK6	2.53e-113	0.035989	TRUE	511.826
rs139120114	C	T	C	T	-0.8142	0.6988	0.4381	0.1106	SPINK6	2.53e-113	0.035989	TRUE	511.826
rs139120114	C	T	C	T	-0.8142	0.6988	0.4381	0.1106	SPINK6	2.53e-113	0.035989	TRUE	511.826
rs139120114	C	T	C	T	-0.8142	0.6988	0.4381	0.1106	SPINK6	2.53e-113	0.035989	TRUE	511.826
rs2279956	C	T	C	T	-0.0757	-0.1295	0.0811	0.1103	HN1	1.37e-20	0.008137	TRUE	86.5492
rs2279956	C	T	C	T	-0.0757	-0.1295	0.0811	0.1103	HN1	1.37e-20	0.008137	TRUE	86.5492
rs2279956	C	T	C	T	-0.0757	-0.1295	0.0811	0.1103	HN1	1.37e-20	0.008137	TRUE	86.5492
rs2279956	C	T	C	T	-0.0757	-0.1295	0.0811	0.1103	HN1	1.37e-20	0.008137	TRUE	86.5492
rs2279956	C	T	C	T	-0.0757	-0.1295	0.0811	0.1103	HN1	1.37e-20	0.008137	TRUE	86.5492
rs6498673	A	T	A	T	-0.0579	-0.1405	0.0878	0.1096	NCAN	1e-10	0.008953	TRUE	41.8235
rs6498673	A	T	A	T	-0.0579	-0.1405	0.0878	0.1096	NCAN	1e-10	0.008953	TRUE	41.8235
rs6498673	A	T	A	T	-0.0579	-0.1405	0.0878	0.1096	NCAN	1e-10	0.008953	TRUE	41.8235
rs6498673	A	T	A	T	-0.0579	-0.1405	0.0878	0.1096	NCAN	1e-10	0.008953	TRUE	41.8235
rs6498673	A	T	A	T	-0.0579	-0.1405	0.0878	0.1096	NCAN	1e-10	0.008953	TRUE	41.8235
rs3132649	A	G	A	G	0.5675	0.2494	0.1557	0.1092	MICA	0	0.008274	TRUE	4704.36
rs3132649	A	G	A	G	0.5675	0.2494	0.1557	0.1092	MICA	0	0.008274	TRUE	4704.36
rs3132649	A	G	A	G	0.5675	0.2494	0.1557	0.1092	MICA	0	0.008274	TRUE	4704.36
rs3132649	A	G	A	G	0.5675	0.2494	0.1557	0.1092	MICA	0	0.008274	TRUE	4704.36
rs3132649	A	G	A	G	0.5675	0.2494	0.1557	0.1092	MICA	0	0.008274	TRUE	4704.36
rs7254892	A	G	A	G	0.534	0.4528	0.2803	0.1062	DHRS9	8.26e-69	0.03046	TRUE	307.343
rs7254892	A	G	A	G	0.534	0.4528	0.2803	0.1062	DHRS9	8.26e-69	0.03046	TRUE	307.343
rs7254892	A	G	A	G	0.534	0.4528	0.2803	0.1062	DHRS9	8.26e-69	0.03046	TRUE	307.343
rs7254892	A	G	A	G	0.534	0.4528	0.2803	0.1062	DHRS9	8.26e-69	0.03046	TRUE	307.343
rs7254892	A	G	A	G	0.534	0.4528	0.2803	0.1062	DHRS9	8.26e-69	0.03046	TRUE	307.343
rs7254892	A	G	A	G	1.3062	0.4528	0.2803	0.1062	ING4	0	0.026452	TRUE	2438.39
rs7254892	A	G	A	G	1.3062	0.4528	0.2803	0.1062	ING4	0	0.026452	TRUE	2438.39
rs7254892	A	G	A	G	1.3062	0.4528	0.2803	0.1062	ING4	0	0.026452	TRUE	2438.39
rs7254892	A	G	A	G	1.3062	0.4528	0.2803	0.1062	ING4	0	0.026452	TRUE	2438.39
rs7254892	A	G	A	G	1.3062	0.4528	0.2803	0.1062	ING4	0	0.026452	TRUE	2438.39
rs7254892	A	G	A	G	1.4862	0.4528	0.2803	0.1062	VPS29	0	0.025113	TRUE	3502.33
rs7254892	A	G	A	G	1.4862	0.4528	0.2803	0.1062	VPS29	0	0.025113	TRUE	3502.33
rs7254892	A	G	A	G	1.4862	0.4528	0.2803	0.1062	VPS29	0	0.025113	TRUE	3502.33
rs7254892	A	G	A	G	1.4862	0.4528	0.2803	0.1062	VPS29	0	0.025113	TRUE	3502.33
rs7254892	A	G	A	G	1.4862	0.4528	0.2803	0.1062	VPS29	0	0.025113	TRUE	3502.33
rs78117461	C	G	C	G	0.1666	-0.3422	0.2115	0.1057	HP	1.44e-10	0.025982	TRUE	41.1154
rs78117461	C	G	C	G	0.1666	-0.3422	0.2115	0.1057	HP	1.44e-10	0.025982	TRUE	41.1154
rs78117461	C	G	C	G	0.1666	-0.3422	0.2115	0.1057	HP	1.44e-10	0.025982	TRUE	41.1154
rs78117461	C	G	C	G	0.1666	-0.3422	0.2115	0.1057	HP	1.44e-10	0.025982	TRUE	41.1154
rs78117461	C	G	C	G	0.1666	-0.3422	0.2115	0.1057	HP	1.44e-10	0.025982	TRUE	41.1154
rs147082524	T	C	T	C	0.4625	1.3669	0.8364	0.1022	MREG	2.5e-11	0.069305	TRUE	44.5343
rs147082524	T	C	T	C	0.4625	1.3669	0.8364	0.1022	MREG	2.5e-11	0.069305	TRUE	44.5343
rs147082524	T	C	T	C	0.4625	1.3669	0.8364	0.1022	MREG	2.5e-11	0.069305	TRUE	44.5343
rs147082524	T	C	T	C	0.4625	1.3669	0.8364	0.1022	MREG	2.5e-11	0.069305	TRUE	44.5343
rs147082524	T	C	T	C	0.4625	1.3669	0.8364	0.1022	MREG	2.5e-11	0.069305	TRUE	44.5343
rs35682671	A	C	A	C	-0.2256	-0.9798	0.5889	0.0961502	LILRA5	1.04e-09	0.036966	TRUE	37.2455
rs35682671	A	C	A	C	-0.2256	-0.9798	0.5889	0.0961502	LILRA5	1.04e-09	0.036966	TRUE	37.2455
rs35682671	A	C	A	C	-0.2256	-0.9798	0.5889	0.0961502	LILRA5	1.04e-09	0.036966	TRUE	37.2455
rs35682671	A	C	A	C	-0.2256	-0.9798	0.5889	0.0961502	LILRA5	1.04e-09	0.036966	TRUE	37.2455
rs35682671	A	C	A	C	-0.2256	-0.9798	0.5889	0.0961502	LILRA5	1.04e-09	0.036966	TRUE	37.2455
rs79744555	C	T	C	T	0.494	-0.2755	0.1644	0.0937303	NPTX1	0	0.009839	TRUE	2520.88
rs79744555	C	T	C	T	0.494	-0.2755	0.1644	0.0937303	NPTX1	0	0.009839	TRUE	2520.88
rs79744555	C	T	C	T	0.494	-0.2755	0.1644	0.0937303	NPTX1	0	0.009839	TRUE	2520.88
rs79744555	C	T	C	T	0.494	-0.2755	0.1644	0.0937303	NPTX1	0	0.009839	TRUE	2520.88
rs79744555	C	T	C	T	0.494	-0.2755	0.1644	0.0937303	NPTX1	0	0.009839	TRUE	2520.88
rs62003545	G	A	G	A	-0.2013	-0.3986	0.2368	0.0923889	NID2	1.36e-11	0.029766	TRUE	45.7348
rs62003545	G	A	G	A	-0.2013	-0.3986	0.2368	0.0923889	NID2	1.36e-11	0.029766	TRUE	45.7348
rs62003545	G	A	G	A	-0.2013	-0.3986	0.2368	0.0923889	NID2	1.36e-11	0.029766	TRUE	45.7348
rs62003545	G	A	G	A	-0.2013	-0.3986	0.2368	0.0923889	NID2	1.36e-11	0.029766	TRUE	45.7348
rs62003545	G	A	G	A	-0.2013	-0.3986	0.2368	0.0923889	NID2	1.36e-11	0.029766	TRUE	45.7348
rs8176743	T	C	T	C	0.2996	0.2023	0.1192	0.0894808	GFRAL	7.41e-76	0.016255	TRUE	339.711
rs8176743	T	C	T	C	0.2996	0.2023	0.1192	0.0894808	GFRAL	7.41e-76	0.016255	TRUE	339.711
rs8176743	T	C	T	C	0.2996	0.2023	0.1192	0.0894808	GFRAL	7.41e-76	0.016255	TRUE	339.711
rs8176743	T	C	T	C	0.2996	0.2023	0.1192	0.0894808	GFRAL	7.41e-76	0.016255	TRUE	339.711
rs8176743	T	C	T	C	0.2996	0.2023	0.1192	0.0894808	GFRAL	7.41e-76	0.016255	TRUE	339.711
rs116984376	A	G	A	G	0.3084	-0.7222	0.4249	0.0891703	DCP1B	3.17e-19	0.03441	TRUE	80.3266
rs116984376	A	G	A	G	0.3084	-0.7222	0.4249	0.0891703	DCP1B	3.17e-19	0.03441	TRUE	80.3266
rs116984376	A	G	A	G	0.3084	-0.7222	0.4249	0.0891703	DCP1B	3.17e-19	0.03441	TRUE	80.3266
rs116984376	A	G	A	G	0.3084	-0.7222	0.4249	0.0891703	DCP1B	3.17e-19	0.03441	TRUE	80.3266
rs116984376	A	G	A	G	0.3084	-0.7222	0.4249	0.0891703	DCP1B	3.17e-19	0.03441	TRUE	80.3266
rs11745587	A	G	A	G	-0.0697	0.1419	0.0831	0.0877809	LGALS3BP	2.97e-16	0.008527	TRUE	66.8149
rs11745587	A	G	A	G	-0.0697	0.1419	0.0831	0.0877809	LGALS3BP	2.97e-16	0.008527	TRUE	66.8149
rs11745587	A	G	A	G	-0.0697	0.1419	0.0831	0.0877809	LGALS3BP	2.97e-16	0.008527	TRUE	66.8149
rs11745587	A	G	A	G	-0.0697	0.1419	0.0831	0.0877809	LGALS3BP	2.97e-16	0.008527	TRUE	66.8149
rs11745587	A	G	A	G	-0.0697	0.1419	0.0831	0.0877809	LGALS3BP	2.97e-16	0.008527	TRUE	66.8149
rs33941127	T	C	T	C	0.1082	-0.17	0.0989	0.0856702	LILRA5	2.21e-22	0.011118	TRUE	94.7112
rs33941127	T	C	T	C	0.1082	-0.17	0.0989	0.0856702	LILRA5	2.21e-22	0.011118	TRUE	94.7112
rs33941127	T	C	T	C	0.1082	-0.17	0.0989	0.0856702	LILRA5	2.21e-22	0.011118	TRUE	94.7112
rs33941127	T	C	T	C	0.1082	-0.17	0.0989	0.0856702	LILRA5	2.21e-22	0.011118	TRUE	94.7112
rs33941127	T	C	T	C	0.1082	-0.17	0.0989	0.0856702	LILRA5	2.21e-22	0.011118	TRUE	94.7112
rs148825612	T	A	T	A	0.1082	0.2824	0.1623	0.0817805	LILRA5	1.82e-11	0.016102	TRUE	45.1539
rs148825612	T	A	T	A	0.1082	0.2824	0.1623	0.0817805	LILRA5	1.82e-11	0.016102	TRUE	45.1539
rs148825612	T	A	T	A	0.1082	0.2824	0.1623	0.0817805	LILRA5	1.82e-11	0.016102	TRUE	45.1539
rs148825612	T	A	T	A	0.1082	0.2824	0.1623	0.0817805	LILRA5	1.82e-11	0.016102	TRUE	45.1539
rs148825612	T	A	T	A	0.1082	0.2824	0.1623	0.0817805	LILRA5	1.82e-11	0.016102	TRUE	45.1539
rs186639850	A	T	A	T	0.3869	-0.7153	0.4074	0.0791207	HP	1.19e-32	0.032513	TRUE	141.607
rs186639850	A	T	A	T	0.3869	-0.7153	0.4074	0.0791207	HP	1.19e-32	0.032513	TRUE	141.607
rs186639850	A	T	A	T	0.3869	-0.7153	0.4074	0.0791207	HP	1.19e-32	0.032513	TRUE	141.607
rs186639850	A	T	A	T	0.3869	-0.7153	0.4074	0.0791207	HP	1.19e-32	0.032513	TRUE	141.607
[truncated: 351 more rows]

## Sheet: Amino acid_PLC_harmonised
SNP	effect_allele.exposure	other_allele.exposure	effect_allele.outcome	other_allele.outcome	beta.exposure	beta.outcome	se.outcome	pval.outcome	id.exposure	pval.exposure	se.exposure	mr_keep	F
rs10132580	T	G	T	G	0.0094	-0.0406	0.097	0.675601	met-a-370	5.67e-08	0.0017	TRUE	30.5744
rs10279326	C	T	C	T	0.0148	-0.3288	0.2185	0.1325	met-a-370	6.52e-06	0.0033	TRUE	20.1139
rs10483826	G	A	G	A	0.0078	0.0351	0.108	0.745501	met-a-370	4.6e-06	0.0017	TRUE	21.0519
rs10937658	A	G	A	G	0.0077	-0.0522	0.0892	0.5582	met-a-370	3.5e-06	0.0017	TRUE	20.5156
rs11715915	T	C	T	C	-0.0076	0.2422	0.0824	0.00328602	met-a-370	3.77e-06	0.0016	TRUE	22.5625
rs11874996	T	C	T	C	-0.0523	0.8854	0.3527	0.0120501	met-a-370	5.62e-06	0.0115	TRUE	20.6827
rs12042948	G	A	G	A	0.0084	0.0453	0.0962	0.637901	met-a-370	1.4e-06	0.0017	TRUE	24.4152
rs12896482	C	T	C	T	0.0109	0.3549	0.1952	0.0690908	met-a-370	4.17e-06	0.0024	TRUE	20.6267
rs1379459	C	T	C	T	-0.0079	-0.0357	0.0949	0.7071	met-a-370	3.14e-06	0.0017	TRUE	21.5952
rs17562832	T	C	T	C	0.0118	-0.0254	0.1622	0.8755	met-a-370	4.17e-06	0.0026	TRUE	20.5976
rs2422370	G	A	G	A	0.0084	0.0042	0.0947	0.9643	met-a-370	5.96e-06	0.0018	TRUE	21.7778
rs2705962	G	A	G	A	-0.0078	0.029	0.0993	0.7701	met-a-370	4.62e-06	0.0017	TRUE	21.0519
rs6129758	G	T	G	T	-0.0078	-0.0058	0.1342	0.9656	met-a-370	7.88e-06	0.0017	TRUE	21.0519
rs6924754	A	G	A	G	0.0154	0.0223	0.1462	0.8789	met-a-370	6.42e-06	0.0034	TRUE	20.5156
rs7068714	A	C	A	C	0.008	-0.0353	0.0979	0.7185	met-a-370	2.97e-06	0.0017	TRUE	22.1453
rs7914384	T	C	T	C	-0.0082	0.004	0.113	0.9717	met-a-370	1.85e-06	0.0017	TRUE	23.2664
rs8046494	G	A	G	A	-0.0138	0.1291	0.1281	0.3134	met-a-370	4.08e-06	0.003	TRUE	21.16
rs905508	T	C	T	C	0.0079	-0.0419	0.1047	0.6889	met-a-370	5.93e-06	0.0017	TRUE	21.5952
rs9861011	G	A	G	A	0.0074	-0.0364	0.085	0.668599	met-a-370	3.8e-06	0.0016	TRUE	21.3906
rs10132580	T	G	T	G	0.0094	-0.0406	0.097	0.675601	met-a-370	5.67e-08	0.0017	TRUE	30.5744
rs10279326	C	T	C	T	0.0148	-0.3288	0.2185	0.1325	met-a-370	6.52e-06	0.0033	TRUE	20.1139
rs10483826	G	A	G	A	0.0078	0.0351	0.108	0.745501	met-a-370	4.6e-06	0.0017	TRUE	21.0519
rs10937658	A	G	A	G	0.0077	-0.0522	0.0892	0.5582	met-a-370	3.5e-06	0.0017	TRUE	20.5156
rs11715915	T	C	T	C	-0.0076	0.2422	0.0824	0.00328602	met-a-370	3.77e-06	0.0016	TRUE	22.5625
rs11874996	T	C	T	C	-0.0523	0.8854	0.3527	0.0120501	met-a-370	5.62e-06	0.0115	TRUE	20.6827
rs12042948	G	A	G	A	0.0084	0.0453	0.0962	0.637901	met-a-370	1.4e-06	0.0017	TRUE	24.4152
rs12896482	C	T	C	T	0.0109	0.3549	0.1952	0.0690908	met-a-370	4.17e-06	0.0024	TRUE	20.6267
rs1379459	C	T	C	T	-0.0079	-0.0357	0.0949	0.7071	met-a-370	3.14e-06	0.0017	TRUE	21.5952
rs17562832	T	C	T	C	0.0118	-0.0254	0.1622	0.8755	met-a-370	4.17e-06	0.0026	TRUE	20.5976
rs2422370	G	A	G	A	0.0084	0.0042	0.0947	0.9643	met-a-370	5.96e-06	0.0018	TRUE	21.7778
rs2705962	G	A	G	A	-0.0078	0.029	0.0993	0.7701	met-a-370	4.62e-06	0.0017	TRUE	21.0519
rs6129758	G	T	G	T	-0.0078	-0.0058	0.1342	0.9656	met-a-370	7.88e-06	0.0017	TRUE	21.0519
rs6924754	A	G	A	G	0.0154	0.0223	0.1462	0.8789	met-a-370	6.42e-06	0.0034	TRUE	20.5156
rs7068714	A	C	A	C	0.008	-0.0353	0.0979	0.7185	met-a-370	2.97e-06	0.0017	TRUE	22.1453
rs7914384	T	C	T	C	-0.0082	0.004	0.113	0.9717	met-a-370	1.85e-06	0.0017	TRUE	23.2664
rs8046494	G	A	G	A	-0.0138	0.1291	0.1281	0.3134	met-a-370	4.08e-06	0.003	TRUE	21.16
rs905508	T	C	T	C	0.0079	-0.0419	0.1047	0.6889	met-a-370	5.93e-06	0.0017	TRUE	21.5952
rs9861011	G	A	G	A	0.0074	-0.0364	0.085	0.668599	met-a-370	3.8e-06	0.0016	TRUE	21.3906
rs10132580	T	G	T	G	0.0094	-0.0406	0.097	0.675601	met-a-370	5.67e-08	0.0017	TRUE	30.5744
rs10279326	C	T	C	T	0.0148	-0.3288	0.2185	0.1325	met-a-370	6.52e-06	0.0033	TRUE	20.1139
rs10483826	G	A	G	A	0.0078	0.0351	0.108	0.745501	met-a-370	4.6e-06	0.0017	TRUE	21.0519
rs10937658	A	G	A	G	0.0077	-0.0522	0.0892	0.5582	met-a-370	3.5e-06	0.0017	TRUE	20.5156
rs11715915	T	C	T	C	-0.0076	0.2422	0.0824	0.00328602	met-a-370	3.77e-06	0.0016	TRUE	22.5625
rs11874996	T	C	T	C	-0.0523	0.8854	0.3527	0.0120501	met-a-370	5.62e-06	0.0115	TRUE	20.6827
rs12042948	G	A	G	A	0.0084	0.0453	0.0962	0.637901	met-a-370	1.4e-06	0.0017	TRUE	24.4152
rs12896482	C	T	C	T	0.0109	0.3549	0.1952	0.0690908	met-a-370	4.17e-06	0.0024	TRUE	20.6267
rs1379459	C	T	C	T	-0.0079	-0.0357	0.0949	0.7071	met-a-370	3.14e-06	0.0017	TRUE	21.5952
rs17562832	T	C	T	C	0.0118	-0.0254	0.1622	0.8755	met-a-370	4.17e-06	0.0026	TRUE	20.5976
rs2422370	G	A	G	A	0.0084	0.0042	0.0947	0.9643	met-a-370	5.96e-06	0.0018	TRUE	21.7778
rs2705962	G	A	G	A	-0.0078	0.029	0.0993	0.7701	met-a-370	4.62e-06	0.0017	TRUE	21.0519
rs6129758	G	T	G	T	-0.0078	-0.0058	0.1342	0.9656	met-a-370	7.88e-06	0.0017	TRUE	21.0519
rs6924754	A	G	A	G	0.0154	0.0223	0.1462	0.8789	met-a-370	6.42e-06	0.0034	TRUE	20.5156
rs7068714	A	C	A	C	0.008	-0.0353	0.0979	0.7185	met-a-370	2.97e-06	0.0017	TRUE	22.1453
rs7914384	T	C	T	C	-0.0082	0.004	0.113	0.9717	met-a-370	1.85e-06	0.0017	TRUE	23.2664
rs8046494	G	A	G	A	-0.0138	0.1291	0.1281	0.3134	met-a-370	4.08e-06	0.003	TRUE	21.16
rs905508	T	C	T	C	0.0079	-0.0419	0.1047	0.6889	met-a-370	5.93e-06	0.0017	TRUE	21.5952
rs9861011	G	A	G	A	0.0074	-0.0364	0.085	0.668599	met-a-370	3.8e-06	0.0016	TRUE	21.3906
rs10132580	T	G	T	G	0.0094	-0.0406	0.097	0.675601	met-a-370	5.67e-08	0.0017	TRUE	30.5744
rs10279326	C	T	C	T	0.0148	-0.3288	0.2185	0.1325	met-a-370	6.52e-06	0.0033	TRUE	20.1139
rs10483826	G	A	G	A	0.0078	0.0351	0.108	0.745501	met-a-370	4.6e-06	0.0017	TRUE	21.0519
rs10937658	A	G	A	G	0.0077	-0.0522	0.0892	0.5582	met-a-370	3.5e-06	0.0017	TRUE	20.5156
rs11715915	T	C	T	C	-0.0076	0.2422	0.0824	0.00328602	met-a-370	3.77e-06	0.0016	TRUE	22.5625
rs11874996	T	C	T	C	-0.0523	0.8854	0.3527	0.0120501	met-a-370	5.62e-06	0.0115	TRUE	20.6827
rs12042948	G	A	G	A	0.0084	0.0453	0.0962	0.637901	met-a-370	1.4e-06	0.0017	TRUE	24.4152
rs12896482	C	T	C	T	0.0109	0.3549	0.1952	0.0690908	met-a-370	4.17e-06	0.0024	TRUE	20.6267
rs1379459	C	T	C	T	-0.0079	-0.0357	0.0949	0.7071	met-a-370	3.14e-06	0.0017	TRUE	21.5952
rs17562832	T	C	T	C	0.0118	-0.0254	0.1622	0.8755	met-a-370	4.17e-06	0.0026	TRUE	20.5976
rs2422370	G	A	G	A	0.0084	0.0042	0.0947	0.9643	met-a-370	5.96e-06	0.0018	TRUE	21.7778
rs2705962	G	A	G	A	-0.0078	0.029	0.0993	0.7701	met-a-370	4.62e-06	0.0017	TRUE	21.0519
rs6129758	G	T	G	T	-0.0078	-0.0058	0.1342	0.9656	met-a-370	7.88e-06	0.0017	TRUE	21.0519
rs6924754	A	G	A	G	0.0154	0.0223	0.1462	0.8789	met-a-370	6.42e-06	0.0034	TRUE	20.5156
rs7068714	A	C	A	C	0.008	-0.0353	0.0979	0.7185	met-a-370	2.97e-06	0.0017	TRUE	22.1453
rs7914384	T	C	T	C	-0.0082	0.004	0.113	0.9717	met-a-370	1.85e-06	0.0017	TRUE	23.2664
rs8046494	G	A	G	A	-0.0138	0.1291	0.1281	0.3134	met-a-370	4.08e-06	0.003	TRUE	21.16
rs905508	T	C	T	C	0.0079	-0.0419	0.1047	0.6889	met-a-370	5.93e-06	0.0017	TRUE	21.5952
rs9861011	G	A	G	A	0.0074	-0.0364	0.085	0.668599	met-a-370	3.8e-06	0.0016	TRUE	21.3906
rs10132580	T	G	T	G	0.0094	-0.0406	0.097	0.675601	met-a-370	5.67e-08	0.0017	TRUE	30.5744
rs10279326	C	T	C	T	0.0148	-0.3288	0.2185	0.1325	met-a-370	6.52e-06	0.0033	TRUE	20.1139
rs10483826	G	A	G	A	0.0078	0.0351	0.108	0.745501	met-a-370	4.6e-06	0.0017	TRUE	21.0519
rs10937658	A	G	A	G	0.0077	-0.0522	0.0892	0.5582	met-a-370	3.5e-06	0.0017	TRUE	20.5156
rs11715915	T	C	T	C	-0.0076	0.2422	0.0824	0.00328602	met-a-370	3.77e-06	0.0016	TRUE	22.5625
rs11874996	T	C	T	C	-0.0523	0.8854	0.3527	0.0120501	met-a-370	5.62e-06	0.0115	TRUE	20.6827
rs12042948	G	A	G	A	0.0084	0.0453	0.0962	0.637901	met-a-370	1.4e-06	0.0017	TRUE	24.4152
rs12896482	C	T	C	T	0.0109	0.3549	0.1952	0.0690908	met-a-370	4.17e-06	0.0024	TRUE	20.6267
rs1379459	C	T	C	T	-0.0079	-0.0357	0.0949	0.7071	met-a-370	3.14e-06	0.0017	TRUE	21.5952
rs17562832	T	C	T	C	0.0118	-0.0254	0.1622	0.8755	met-a-370	4.17e-06	0.0026	TRUE	20.5976
rs2422370	G	A	G	A	0.0084	0.0042	0.0947	0.9643	met-a-370	5.96e-06	0.0018	TRUE	21.7778
rs2705962	G	A	G	A	-0.0078	0.029	0.0993	0.7701	met-a-370	4.62e-06	0.0017	TRUE	21.0519
rs6129758	G	T	G	T	-0.0078	-0.0058	0.1342	0.9656	met-a-370	7.88e-06	0.0017	TRUE	21.0519
rs6924754	A	G	A	G	0.0154	0.0223	0.1462	0.8789	met-a-370	6.42e-06	0.0034	TRUE	20.5156
rs7068714	A	C	A	C	0.008	-0.0353	0.0979	0.7185	met-a-370	2.97e-06	0.0017	TRUE	22.1453
rs7914384	T	C	T	C	-0.0082	0.004	0.113	0.9717	met-a-370	1.85e-06	0.0017	TRUE	23.2664
rs8046494	G	A	G	A	-0.0138	0.1291	0.1281	0.3134	met-a-370	4.08e-06	0.003	TRUE	21.16
rs905508	T	C	T	C	0.0079	-0.0419	0.1047	0.6889	met-a-370	5.93e-06	0.0017	TRUE	21.5952
rs9861011	G	A	G	A	0.0074	-0.0364	0.085	0.668599	met-a-370	3.8e-06	0.0016	TRUE	21.3906
rs10426856	G	A	G	A	0.0157	-0.096	0.1286	0.4556	met-a-371	8.06e-06	0.0035	TRUE	20.1216
rs16940342	G	A	G	A	-0.0158	0.1674	0.1007	0.0964007	met-a-371	5.36e-06	0.0035	TRUE	20.3788
rs17150563	C	T	C	T	-0.0117	0.0512	0.0985	0.6035	met-a-371	4.61e-06	0.0026	TRUE	20.25
rs684748	G	C	G	C	-0.018	0.1157	0.1327	0.3831	met-a-371	8.62e-06	0.0041	TRUE	19.2742
rs6904862	C	T	C	T	-0.0115	0.0707	0.1004	0.4815	met-a-371	9.42e-06	0.0026	TRUE	19.5636
rs7844733	T	C	T	C	-0.0126	0.2141	0.1081	0.0475905	met-a-371	2.67e-06	0.0027	TRUE	21.7778
rs8105499	A	C	A	C	0.0123	0.0576	0.0896	0.5203	met-a-371	1.57e-06	0.0026	TRUE	22.3802
rs10426856	G	A	G	A	0.0157	-0.096	0.1286	0.4556	met-a-371	8.06e-06	0.0035	TRUE	20.1216
rs16940342	G	A	G	A	-0.0158	0.1674	0.1007	0.0964007	met-a-371	5.36e-06	0.0035	TRUE	20.3788
rs17150563	C	T	C	T	-0.0117	0.0512	0.0985	0.6035	met-a-371	4.61e-06	0.0026	TRUE	20.25
rs684748	G	C	G	C	-0.018	0.1157	0.1327	0.3831	met-a-371	8.62e-06	0.0041	TRUE	19.2742
rs6904862	C	T	C	T	-0.0115	0.0707	0.1004	0.4815	met-a-371	9.42e-06	0.0026	TRUE	19.5636
rs7844733	T	C	T	C	-0.0126	0.2141	0.1081	0.0475905	met-a-371	2.67e-06	0.0027	TRUE	21.7778
rs8105499	A	C	A	C	0.0123	0.0576	0.0896	0.5203	met-a-371	1.57e-06	0.0026	TRUE	22.3802
rs10426856	G	A	G	A	0.0157	-0.096	0.1286	0.4556	met-a-371	8.06e-06	0.0035	TRUE	20.1216
rs16940342	G	A	G	A	-0.0158	0.1674	0.1007	0.0964007	met-a-371	5.36e-06	0.0035	TRUE	20.3788
rs17150563	C	T	C	T	-0.0117	0.0512	0.0985	0.6035	met-a-371	4.61e-06	0.0026	TRUE	20.25
rs684748	G	C	G	C	-0.018	0.1157	0.1327	0.3831	met-a-371	8.62e-06	0.0041	TRUE	19.2742
rs6904862	C	T	C	T	-0.0115	0.0707	0.1004	0.4815	met-a-371	9.42e-06	0.0026	TRUE	19.5636
rs7844733	T	C	T	C	-0.0126	0.2141	0.1081	0.0475905	met-a-371	2.67e-06	0.0027	TRUE	21.7778
rs8105499	A	C	A	C	0.0123	0.0576	0.0896	0.5203	met-a-371	1.57e-06	0.0026	TRUE	22.3802
rs10426856	G	A	G	A	0.0157	-0.096	0.1286	0.4556	met-a-371	8.06e-06	0.0035	TRUE	20.1216
rs16940342	G	A	G	A	-0.0158	0.1674	0.1007	0.0964007	met-a-371	5.36e-06	0.0035	TRUE	20.3788
rs17150563	C	T	C	T	-0.0117	0.0512	0.0985	0.6035	met-a-371	4.61e-06	0.0026	TRUE	20.25
rs684748	G	C	G	C	-0.018	0.1157	0.1327	0.3831	met-a-371	8.62e-06	0.0041	TRUE	19.2742
rs6904862	C	T	C	T	-0.0115	0.0707	0.1004	0.4815	met-a-371	9.42e-06	0.0026	TRUE	19.5636
rs7844733	T	C	T	C	-0.0126	0.2141	0.1081	0.0475905	met-a-371	2.67e-06	0.0027	TRUE	21.7778
rs8105499	A	C	A	C	0.0123	0.0576	0.0896	0.5203	met-a-371	1.57e-06	0.0026	TRUE	22.3802
rs10426856	G	A	G	A	0.0157	-0.096	0.1286	0.4556	met-a-371	8.06e-06	0.0035	TRUE	20.1216
rs16940342	G	A	G	A	-0.0158	0.1674	0.1007	0.0964007	met-a-371	5.36e-06	0.0035	TRUE	20.3788
rs17150563	C	T	C	T	-0.0117	0.0512	0.0985	0.6035	met-a-371	4.61e-06	0.0026	TRUE	20.25
rs684748	G	C	G	C	-0.018	0.1157	0.1327	0.3831	met-a-371	8.62e-06	0.0041	TRUE	19.2742
rs6904862	C	T	C	T	-0.0115	0.0707	0.1004	0.4815	met-a-371	9.42e-06	0.0026	TRUE	19.5636
rs7844733	T	C	T	C	-0.0126	0.2141	0.1081	0.0475905	met-a-371	2.67e-06	0.0027	TRUE	21.7778
rs8105499	A	C	A	C	0.0123	0.0576	0.0896	0.5203	met-a-371	1.57e-06	0.0026	TRUE	22.3802
rs12143106	C	T	C	T	-0.0232	0.0194	0.0852	0.8199	met-a-432	4.77e-06	0.0051	TRUE	20.6936
rs13057057	T	C	T	C	-0.0943	-0.4458	0.3404	0.1904	met-a-432	8.37e-06	0.0212	TRUE	19.7857
rs16973789	A	G	A	G	-0.073	-0.1299	0.1654	0.4325	met-a-432	5.05e-06	0.016	TRUE	20.8164
rs495828	T	G	T	G	-0.0312	-0.0979	0.0971	0.3131	met-a-432	1.43e-07	0.0059	TRUE	27.9644
rs4968748	A	G	A	G	-0.0307	-0.2621	0.0927	0.004719	met-a-432	1.83e-07	0.0059	TRUE	27.0753
rs8176731	C	T	C	T	0.0238	-0.0197	0.0862	0.8195	met-a-432	2.8e-06	0.0051	TRUE	21.7778
rs12143106	C	T	C	T	-0.0232	0.0194	0.0852	0.8199	met-a-432	4.77e-06	0.0051	TRUE	20.6936
rs13057057	T	C	T	C	-0.0943	-0.4458	0.3404	0.1904	met-a-432	8.37e-06	0.0212	TRUE	19.7857
rs16973789	A	G	A	G	-0.073	-0.1299	0.1654	0.4325	met-a-432	5.05e-06	0.016	TRUE	20.8164
rs495828	T	G	T	G	-0.0312	-0.0979	0.0971	0.3131	met-a-432	1.43e-07	0.0059	TRUE	27.9644
rs4968748	A	G	A	G	-0.0307	-0.2621	0.0927	0.004719	met-a-432	1.83e-07	0.0059	TRUE	27.0753
rs8176731	C	T	C	T	0.0238	-0.0197	0.0862	0.8195	met-a-432	2.8e-06	0.0051	TRUE	21.7778
rs12143106	C	T	C	T	-0.0232	0.0194	0.0852	0.8199	met-a-432	4.77e-06	0.0051	TRUE	20.6936
rs13057057	T	C	T	C	-0.0943	-0.4458	0.3404	0.1904	met-a-432	8.37e-06	0.0212	TRUE	19.7857
rs16973789	A	G	A	G	-0.073	-0.1299	0.1654	0.4325	met-a-432	5.05e-06	0.016	TRUE	20.8164
rs495828	T	G	T	G	-0.0312	-0.0979	0.0971	0.3131	met-a-432	1.43e-07	0.0059	TRUE	27.9644
rs4968748	A	G	A	G	-0.0307	-0.2621	0.0927	0.004719	met-a-432	1.83e-07	0.0059	TRUE	27.0753
rs8176731	C	T	C	T	0.0238	-0.0197	0.0862	0.8195	met-a-432	2.8e-06	0.0051	TRUE	21.7778
rs12143106	C	T	C	T	-0.0232	0.0194	0.0852	0.8199	met-a-432	4.77e-06	0.0051	TRUE	20.6936
rs13057057	T	C	T	C	-0.0943	-0.4458	0.3404	0.1904	met-a-432	8.37e-06	0.0212	TRUE	19.7857
rs16973789	A	G	A	G	-0.073	-0.1299	0.1654	0.4325	met-a-432	5.05e-06	0.016	TRUE	20.8164
rs495828	T	G	T	G	-0.0312	-0.0979	0.0971	0.3131	met-a-432	1.43e-07	0.0059	TRUE	27.9644
rs4968748	A	G	A	G	-0.0307	-0.2621	0.0927	0.004719	met-a-432	1.83e-07	0.0059	TRUE	27.0753
rs8176731	C	T	C	T	0.0238	-0.0197	0.0862	0.8195	met-a-432	2.8e-06	0.0051	TRUE	21.7778
rs12143106	C	T	C	T	-0.0232	0.0194	0.0852	0.8199	met-a-432	4.77e-06	0.0051	TRUE	20.6936
rs13057057	T	C	T	C	-0.0943	-0.4458	0.3404	0.1904	met-a-432	8.37e-06	0.0212	TRUE	19.7857
rs16973789	A	G	A	G	-0.073	-0.1299	0.1654	0.4325	met-a-432	5.05e-06	0.016	TRUE	20.8164
rs495828	T	G	T	G	-0.0312	-0.0979	0.0971	0.3131	met-a-432	1.43e-07	0.0059	TRUE	27.9644
rs4968748	A	G	A	G	-0.0307	-0.2621	0.0927	0.004719	met-a-432	1.83e-07	0.0059	TRUE	27.0753
rs8176731	C	T	C	T	0.0238	-0.0197	0.0862	0.8195	met-a-432	2.8e-06	0.0051	TRUE	21.7778
rs10906914	C	A	C	A	-0.0172	-0.0456	0.0828	0.5815	met-a-465	4.81e-06	0.0038	TRUE	20.4875
rs6926138	C	T	C	T	0.0337	0.1291	0.0866	0.1361	met-a-465	6.26e-06	0.0075	TRUE	20.19
rs7342491	T	C	T	C	-0.1192	-0.2918	0.3014	0.3329	met-a-465	6.49e-06	0.0264	TRUE	20.3866
rs7429997	T	C	T	C	-0.0161	-0.0122	0.0872	0.8885	met-a-465	9.94e-06	0.0037	TRUE	18.9343
rs9863850	G	A	G	A	0.0177	0.1012	0.0912	0.2676	met-a-465	8.55e-06	0.004	TRUE	19.5806
rs10906914	C	A	C	A	-0.0172	-0.0456	0.0828	0.5815	met-a-465	4.81e-06	0.0038	TRUE	20.4875
rs6926138	C	T	C	T	0.0337	0.1291	0.0866	0.1361	met-a-465	6.26e-06	0.0075	TRUE	20.19
rs7342491	T	C	T	C	-0.1192	-0.2918	0.3014	0.3329	met-a-465	6.49e-06	0.0264	TRUE	20.3866
rs7429997	T	C	T	C	-0.0161	-0.0122	0.0872	0.8885	met-a-465	9.94e-06	0.0037	TRUE	18.9343
rs9863850	G	A	G	A	0.0177	0.1012	0.0912	0.2676	met-a-465	8.55e-06	0.004	TRUE	19.5806
rs10906914	C	A	C	A	-0.0172	-0.0456	0.0828	0.5815	met-a-465	4.81e-06	0.0038	TRUE	20.4875
rs6926138	C	T	C	T	0.0337	0.1291	0.0866	0.1361	met-a-465	6.26e-06	0.0075	TRUE	20.19
rs7342491	T	C	T	C	-0.1192	-0.2918	0.3014	0.3329	met-a-465	6.49e-06	0.0264	TRUE	20.3866
rs7429997	T	C	T	C	-0.0161	-0.0122	0.0872	0.8885	met-a-465	9.94e-06	0.0037	TRUE	18.9343
rs9863850	G	A	G	A	0.0177	0.1012	0.0912	0.2676	met-a-465	8.55e-06	0.004	TRUE	19.5806
rs10906914	C	A	C	A	-0.0172	-0.0456	0.0828	0.5815	met-a-465	4.81e-06	0.0038	TRUE	20.4875
rs6926138	C	T	C	T	0.0337	0.1291	0.0866	0.1361	met-a-465	6.26e-06	0.0075	TRUE	20.19
rs7342491	T	C	T	C	-0.1192	-0.2918	0.3014	0.3329	met-a-465	6.49e-06	0.0264	TRUE	20.3866
rs7429997	T	C	T	C	-0.0161	-0.0122	0.0872	0.8885	met-a-465	9.94e-06	0.0037	TRUE	18.9343
rs9863850	G	A	G	A	0.0177	0.1012	0.0912	0.2676	met-a-465	8.55e-06	0.004	TRUE	19.5806
rs10906914	C	A	C	A	-0.0172	-0.0456	0.0828	0.5815	met-a-465	4.81e-06	0.0038	TRUE	20.4875
rs6926138	C	T	C	T	0.0337	0.1291	0.0866	0.1361	met-a-465	6.26e-06	0.0075	TRUE	20.19
rs7342491	T	C	T	C	-0.1192	-0.2918	0.3014	0.3329	met-a-465	6.49e-06	0.0264	TRUE	20.3866
rs7429997	T	C	T	C	-0.0161	-0.0122	0.0872	0.8885	met-a-465	9.94e-06	0.0037	TRUE	18.9343
rs9863850	G	A	G	A	0.0177	0.1012	0.0912	0.2676	met-a-465	8.55e-06	0.004	TRUE	19.5806
rs10019724	A	G	A	G	0.0388	-0.0987	0.1559	0.5266	met-a-476	4.97e-06	0.0085	TRUE	20.8365
rs10019739	C	T	C	T	0.0191	0.0159	0.0966	0.8691	met-a-476	6.45e-06	0.0042	TRUE	20.6808
rs10849846	C	T	C	T	-0.0511	-0.0739	0.1483	0.617999	met-a-476	1.34e-07	0.0097	TRUE	27.7523
rs10979172	T	C	T	C	-0.1703	0.239	0.2018	0.2361	met-a-476	9.65e-06	0.0385	TRUE	19.5663
rs11043310	T	C	T	C	-0.0629	0.2302	0.161	0.1527	met-a-476	9.88e-07	0.0129	TRUE	23.7751
rs11065176	T	C	T	C	0.1404	-0.0914	0.2235	0.6826	met-a-476	2.42e-37	0.011	TRUE	162.91
rs11065202	C	T	C	T	0.1297	-0.1315	0.0822	0.11	met-a-476	1e-200	0.004	TRUE	1051.38
rs11065208	A	G	A	G	-0.0683	0.1649	0.2449	0.5007	met-a-476	1.17e-10	0.0106	TRUE	41.5174
rs11065360	G	A	G	A	-0.0672	0.0091	0.083	0.9127	met-a-476	4.29e-59	0.0041	TRUE	268.64
rs11065390	A	G	A	G	-0.0678	-0.0585	0.3099	0.8503	met-a-476	3.23e-09	0.0115	TRUE	34.7587
rs11610379	T	C	T	C	0.0891	0.1945	0.1761	0.2694	met-a-476	5.09e-12	0.0129	TRUE	47.7063
rs11611311	T	A	T	A	-0.0463	0.0588	0.1037	0.5703	met-a-476	1.65e-15	0.0058	TRUE	63.7244
rs1179368	C	T	C	T	0.0533	-0.1528	0.206	0.4581	met-a-476	2.83e-08	0.0096	TRUE	30.8256
rs1182946	C	A	C	A	-0.0716	-0.2015	0.2452	0.4113	met-a-476	2.49e-10	0.0113	TRUE	40.1485
rs1186055	A	C	A	C	-0.0344	-0.1197	0.0857	0.1625	met-a-476	1.3e-15	0.0043	TRUE	64
rs12304179	G	C	G	C	0.0243	0.0363	0.1435	0.8003	met-a-476	2.4e-06	0.0052	TRUE	21.8376
rs12356193	G	A	G	A	-0.0358	-0.0817	0.139	0.5567	met-a-476	5.06e-12	0.0052	TRUE	47.3979
rs12369156	A	G	A	G	-0.0724	-0.4251	0.3879	0.2731	met-a-476	8.37e-09	0.0126	TRUE	33.0169
rs12423303	G	A	G	A	-0.0403	-0.1806	0.168	0.2822	met-a-476	2.61e-06	0.0086	TRUE	21.959
rs12822898	T	C	T	C	0.1529	-0.1752	0.1355	0.196	met-a-476	6.98e-146	0.0059	TRUE	671.6
rs1493755	G	A	G	A	-0.0291	-0.0934	0.1136	0.411	met-a-476	5.34e-07	0.0058	TRUE	25.1727
rs16950755	C	G	C	G	-0.0533	-0.1082	0.148	0.4647	met-a-476	1.66e-13	0.0072	TRUE	54.8011
rs17129837	T	C	T	C	0.0443	-0.1082	0.1453	0.4563	met-a-476	6e-07	0.0089	TRUE	24.7758
rs17762815	A	G	A	G	-0.0629	0.0801	0.1696	0.636999	met-a-476	8.08e-07	0.0127	TRUE	24.5298
rs206967	T	C	T	C	-0.0323	0.0107	0.0845	0.8989	met-a-476	2.81e-07	0.0063	TRUE	26.286
rs2071190	A	T	A	T	-0.0748	0.1038	0.099	0.2944	met-a-476	8.44e-68	0.0043	TRUE	302.598
rs2469211	T	A	T	A	0.0342	0.0841	0.1215	0.4885	met-a-476	1.06e-08	0.006	TRUE	32.49
rs274567	T	C	T	C	0.024	0.2185	0.0816	0.00745504	met-a-476	6.23e-09	0.0041	TRUE	34.2653
rs3751143	C	A	C	A	0.0273	0.0339	0.1327	0.7981	met-a-476	5.07e-07	0.0054	TRUE	25.5586
rs3817190	A	T	A	T	0.0249	-0.0051	0.0854	0.9521	met-a-476	1.14e-07	0.0047	TRUE	28.0675
rs3850516	G	T	G	T	0.0376	-0.1739	0.1553	0.2626	met-a-476	9.29e-13	0.0053	TRUE	50.3297
rs4638383	C	G	C	G	-0.0702	0.027	0.1191	0.821	met-a-476	5.54e-33	0.0059	TRUE	141.57
rs4766962	T	A	T	A	-0.0516	0.121	0.0854	0.1561	met-a-476	1.7e-33	0.0043	TRUE	144
rs4767918	C	T	C	T	-0.0845	0.2458	0.0902	0.00641505	met-a-476	2.01e-109	0.0038	TRUE	494.477
rs6462769	C	T	C	T	-0.0194	0.0574	0.0861	0.5054	met-a-476	5.68e-06	0.0043	TRUE	20.3548
rs648238	G	A	G	A	-0.027	-0.0188	0.1455	0.897	met-a-476	4.53e-06	0.0059	TRUE	20.9423
rs662138	G	C	G	C	-0.0277	-0.0278	0.1149	0.809	met-a-476	8.62e-08	0.0052	TRUE	28.3761
rs6668509	A	T	A	T	0.0464	0.1338	0.1855	0.4708	met-a-476	3.05e-06	0.0099	TRUE	21.9667
rs6696978	G	A	G	A	-0.0192	-0.0325	0.0942	0.73	met-a-476	9.33e-06	0.0043	TRUE	19.9373
rs7304812	A	T	A	T	0.0819	0.0083	0.088	0.9253	met-a-476	2.99e-43	0.0059	TRUE	192.692
rs7965649	T	C	T	C	-0.0766	0.0684	0.107	0.522801	met-a-476	7.23e-50	0.0052	TRUE	216.996
rs9586807	A	T	A	T	-0.0243	-0.1095	0.0948	0.2483	met-a-476	3.37e-06	0.0052	TRUE	21.8376
rs9657933	C	A	C	A	-0.0442	-0.079	0.1361	0.5616	met-a-476	1.05e-06	0.0091	TRUE	23.5918
rs10019724	A	G	A	G	0.0388	-0.0987	0.1559	0.5266	met-a-476	4.97e-06	0.0085	TRUE	20.8365
rs10019739	C	T	C	T	0.0191	0.0159	0.0966	0.8691	met-a-476	6.45e-06	0.0042	TRUE	20.6808
rs10849846	C	T	C	T	-0.0511	-0.0739	0.1483	0.617999	met-a-476	1.34e-07	0.0097	TRUE	27.7523
rs10979172	T	C	T	C	-0.1703	0.239	0.2018	0.2361	met-a-476	9.65e-06	0.0385	TRUE	19.5663
rs11043310	T	C	T	C	-0.0629	0.2302	0.161	0.1527	met-a-476	9.88e-07	0.0129	TRUE	23.7751
rs11065176	T	C	T	C	0.1404	-0.0914	0.2235	0.6826	met-a-476	2.42e-37	0.011	TRUE	162.91
rs11065202	C	T	C	T	0.1297	-0.1315	0.0822	0.11	met-a-476	1e-200	0.004	TRUE	1051.38
rs11065208	A	G	A	G	-0.0683	0.1649	0.2449	0.5007	met-a-476	1.17e-10	0.0106	TRUE	41.5174
rs11065360	G	A	G	A	-0.0672	0.0091	0.083	0.9127	met-a-476	4.29e-59	0.0041	TRUE	268.64
rs11065390	A	G	A	G	-0.0678	-0.0585	0.3099	0.8503	met-a-476	3.23e-09	0.0115	TRUE	34.7587
rs11610379	T	C	T	C	0.0891	0.1945	0.1761	0.2694	met-a-476	5.09e-12	0.0129	TRUE	47.7063
rs11611311	T	A	T	A	-0.0463	0.0588	0.1037	0.5703	met-a-476	1.65e-15	0.0058	TRUE	63.7244
rs1179368	C	T	C	T	0.0533	-0.1528	0.206	0.4581	met-a-476	2.83e-08	0.0096	TRUE	30.8256
rs1182946	C	A	C	A	-0.0716	-0.2015	0.2452	0.4113	met-a-476	2.49e-10	0.0113	TRUE	40.1485
rs1186055	A	C	A	C	-0.0344	-0.1197	0.0857	0.1625	met-a-476	1.3e-15	0.0043	TRUE	64
rs12304179	G	C	G	C	0.0243	0.0363	0.1435	0.8003	met-a-476	2.4e-06	0.0052	TRUE	21.8376
rs12356193	G	A	G	A	-0.0358	-0.0817	0.139	0.5567	met-a-476	5.06e-12	0.0052	TRUE	47.3979
rs12369156	A	G	A	G	-0.0724	-0.4251	0.3879	0.2731	met-a-476	8.37e-09	0.0126	TRUE	33.0169
rs12423303	G	A	G	A	-0.0403	-0.1806	0.168	0.2822	met-a-476	2.61e-06	0.0086	TRUE	21.959
rs12822898	T	C	T	C	0.1529	-0.1752	0.1355	0.196	met-a-476	6.98e-146	0.0059	TRUE	671.6
rs1493755	G	A	G	A	-0.0291	-0.0934	0.1136	0.411	met-a-476	5.34e-07	0.0058	TRUE	25.1727
rs16950755	C	G	C	G	-0.0533	-0.1082	0.148	0.4647	met-a-476	1.66e-13	0.0072	TRUE	54.8011
rs17129837	T	C	T	C	0.0443	-0.1082	0.1453	0.4563	met-a-476	6e-07	0.0089	TRUE	24.7758
rs17762815	A	G	A	G	-0.0629	0.0801	0.1696	0.636999	met-a-476	8.08e-07	0.0127	TRUE	24.5298
rs206967	T	C	T	C	-0.0323	0.0107	0.0845	0.8989	met-a-476	2.81e-07	0.0063	TRUE	26.286
rs2071190	A	T	A	T	-0.0748	0.1038	0.099	0.2944	met-a-476	8.44e-68	0.0043	TRUE	302.598
rs2469211	T	A	T	A	0.0342	0.0841	0.1215	0.4885	met-a-476	1.06e-08	0.006	TRUE	32.49
rs274567	T	C	T	C	0.024	0.2185	0.0816	0.00745504	met-a-476	6.23e-09	0.0041	TRUE	34.2653
rs3751143	C	A	C	A	0.0273	0.0339	0.1327	0.7981	met-a-476	5.07e-07	0.0054	TRUE	25.5586
rs3817190	A	T	A	T	0.0249	-0.0051	0.0854	0.9521	met-a-476	1.14e-07	0.0047	TRUE	28.0675
rs3850516	G	T	G	T	0.0376	-0.1739	0.1553	0.2626	met-a-476	9.29e-13	0.0053	TRUE	50.3297
rs4638383	C	G	C	G	-0.0702	0.027	0.1191	0.821	met-a-476	5.54e-33	0.0059	TRUE	141.57
rs4766962	T	A	T	A	-0.0516	0.121	0.0854	0.1561	met-a-476	1.7e-33	0.0043	TRUE	144
rs4767918	C	T	C	T	-0.0845	0.2458	0.0902	0.00641505	met-a-476	2.01e-109	0.0038	TRUE	494.477
rs6462769	C	T	C	T	-0.0194	0.0574	0.0861	0.5054	met-a-476	5.68e-06	0.0043	TRUE	20.3548
rs648238	G	A	G	A	-0.027	-0.0188	0.1455	0.897	met-a-476	4.53e-06	0.0059	TRUE	20.9423
rs662138	G	C	G	C	-0.0277	-0.0278	0.1149	0.809	met-a-476	8.62e-08	0.0052	TRUE	28.3761
rs6668509	A	T	A	T	0.0464	0.1338	0.1855	0.4708	met-a-476	3.05e-06	0.0099	TRUE	21.9667
rs6696978	G	A	G	A	-0.0192	-0.0325	0.0942	0.73	met-a-476	9.33e-06	0.0043	TRUE	19.9373
rs7304812	A	T	A	T	0.0819	0.0083	0.088	0.9253	met-a-476	2.99e-43	0.0059	TRUE	192.692
rs7965649	T	C	T	C	-0.0766	0.0684	0.107	0.522801	met-a-476	7.23e-50	0.0052	TRUE	216.996
rs9586807	A	T	A	T	-0.0243	-0.1095	0.0948	0.2483	met-a-476	3.37e-06	0.0052	TRUE	21.8376
rs9657933	C	A	C	A	-0.0442	-0.079	0.1361	0.5616	met-a-476	1.05e-06	0.0091	TRUE	23.5918
rs10019724	A	G	A	G	0.0388	-0.0987	0.1559	0.5266	met-a-476	4.97e-06	0.0085	TRUE	20.8365
rs10019739	C	T	C	T	0.0191	0.0159	0.0966	0.8691	met-a-476	6.45e-06	0.0042	TRUE	20.6808
rs10849846	C	T	C	T	-0.0511	-0.0739	0.1483	0.617999	met-a-476	1.34e-07	0.0097	TRUE	27.7523
rs10979172	T	C	T	C	-0.1703	0.239	0.2018	0.2361	met-a-476	9.65e-06	0.0385	TRUE	19.5663
rs11043310	T	C	T	C	-0.0629	0.2302	0.161	0.1527	met-a-476	9.88e-07	0.0129	TRUE	23.7751
rs11065176	T	C	T	C	0.1404	-0.0914	0.2235	0.6826	met-a-476	2.42e-37	0.011	TRUE	162.91
rs11065202	C	T	C	T	0.1297	-0.1315	0.0822	0.11	met-a-476	1e-200	0.004	TRUE	1051.38
rs11065208	A	G	A	G	-0.0683	0.1649	0.2449	0.5007	met-a-476	1.17e-10	0.0106	TRUE	41.5174
rs11065360	G	A	G	A	-0.0672	0.0091	0.083	0.9127	met-a-476	4.29e-59	0.0041	TRUE	268.64
rs11065390	A	G	A	G	-0.0678	-0.0585	0.3099	0.8503	met-a-476	3.23e-09	0.0115	TRUE	34.7587
rs11610379	T	C	T	C	0.0891	0.1945	0.1761	0.2694	met-a-476	5.09e-12	0.0129	TRUE	47.7063
rs11611311	T	A	T	A	-0.0463	0.0588	0.1037	0.5703	met-a-476	1.65e-15	0.0058	TRUE	63.7244
rs1179368	C	T	C	T	0.0533	-0.1528	0.206	0.4581	met-a-476	2.83e-08	0.0096	TRUE	30.8256
rs1182946	C	A	C	A	-0.0716	-0.2015	0.2452	0.4113	met-a-476	2.49e-10	0.0113	TRUE	40.1485
rs1186055	A	C	A	C	-0.0344	-0.1197	0.0857	0.1625	met-a-476	1.3e-15	0.0043	TRUE	64
rs12304179	G	C	G	C	0.0243	0.0363	0.1435	0.8003	met-a-476	2.4e-06	0.0052	TRUE	21.8376
rs12356193	G	A	G	A	-0.0358	-0.0817	0.139	0.5567	met-a-476	5.06e-12	0.0052	TRUE	47.3979
rs12369156	A	G	A	G	-0.0724	-0.4251	0.3879	0.2731	met-a-476	8.37e-09	0.0126	TRUE	33.0169
rs12423303	G	A	G	A	-0.0403	-0.1806	0.168	0.2822	met-a-476	2.61e-06	0.0086	TRUE	21.959
rs12822898	T	C	T	C	0.1529	-0.1752	0.1355	0.196	met-a-476	6.98e-146	0.0059	TRUE	671.6
rs1493755	G	A	G	A	-0.0291	-0.0934	0.1136	0.411	met-a-476	5.34e-07	0.0058	TRUE	25.1727
rs16950755	C	G	C	G	-0.0533	-0.1082	0.148	0.4647	met-a-476	1.66e-13	0.0072	TRUE	54.8011
rs17129837	T	C	T	C	0.0443	-0.1082	0.1453	0.4563	met-a-476	6e-07	0.0089	TRUE	24.7758
rs17762815	A	G	A	G	-0.0629	0.0801	0.1696	0.636999	met-a-476	8.08e-07	0.0127	TRUE	24.5298
rs206967	T	C	T	C	-0.0323	0.0107	0.0845	0.8989	met-a-476	2.81e-07	0.0063	TRUE	26.286
rs2071190	A	T	A	T	-0.0748	0.1038	0.099	0.2944	met-a-476	8.44e-68	0.0043	TRUE	302.598
rs2469211	T	A	T	A	0.0342	0.0841	0.1215	0.4885	met-a-476	1.06e-08	0.006	TRUE	32.49
rs274567	T	C	T	C	0.024	0.2185	0.0816	0.00745504	met-a-476	6.23e-09	0.0041	TRUE	34.2653
rs3751143	C	A	C	A	0.0273	0.0339	0.1327	0.7981	met-a-476	5.07e-07	0.0054	TRUE	25.5586
rs3817190	A	T	A	T	0.0249	-0.0051	0.0854	0.9521	met-a-476	1.14e-07	0.0047	TRUE	28.0675
rs3850516	G	T	G	T	0.0376	-0.1739	0.1553	0.2626	met-a-476	9.29e-13	0.0053	TRUE	50.3297
rs4638383	C	G	C	G	-0.0702	0.027	0.1191	0.821	met-a-476	5.54e-33	0.0059	TRUE	141.57
rs4766962	T	A	T	A	-0.0516	0.121	0.0854	0.1561	met-a-476	1.7e-33	0.0043	TRUE	144
rs4767918	C	T	C	T	-0.0845	0.2458	0.0902	0.00641505	met-a-476	2.01e-109	0.0038	TRUE	494.477
rs6462769	C	T	C	T	-0.0194	0.0574	0.0861	0.5054	met-a-476	5.68e-06	0.0043	TRUE	20.3548
rs648238	G	A	G	A	-0.027	-0.0188	0.1455	0.897	met-a-476	4.53e-06	0.0059	TRUE	20.9423
rs662138	G	C	G	C	-0.0277	-0.0278	0.1149	0.809	met-a-476	8.62e-08	0.0052	TRUE	28.3761
rs6668509	A	T	A	T	0.0464	0.1338	0.1855	0.4708	met-a-476	3.05e-06	0.0099	TRUE	21.9667
rs6696978	G	A	G	A	-0.0192	-0.0325	0.0942	0.73	met-a-476	9.33e-06	0.0043	TRUE	19.9373
rs7304812	A	T	A	T	0.0819	0.0083	0.088	0.9253	met-a-476	2.99e-43	0.0059	TRUE	192.692
rs7965649	T	C	T	C	-0.0766	0.0684	0.107	0.522801	met-a-476	7.23e-50	0.0052	TRUE	216.996
rs9586807	A	T	A	T	-0.0243	-0.1095	0.0948	0.2483	met-a-476	3.37e-06	0.0052	TRUE	21.8376
rs9657933	C	A	C	A	-0.0442	-0.079	0.1361	0.5616	met-a-476	1.05e-06	0.0091	TRUE	23.5918
rs10019724	A	G	A	G	0.0388	-0.0987	0.1559	0.5266	met-a-476	4.97e-06	0.0085	TRUE	20.8365
rs10019739	C	T	C	T	0.0191	0.0159	0.0966	0.8691	met-a-476	6.45e-06	0.0042	TRUE	20.6808
rs10849846	C	T	C	T	-0.0511	-0.0739	0.1483	0.617999	met-a-476	1.34e-07	0.0097	TRUE	27.7523
rs10979172	T	C	T	C	-0.1703	0.239	0.2018	0.2361	met-a-476	9.65e-06	0.0385	TRUE	19.5663
rs11043310	T	C	T	C	-0.0629	0.2302	0.161	0.1527	met-a-476	9.88e-07	0.0129	TRUE	23.7751
rs11065176	T	C	T	C	0.1404	-0.0914	0.2235	0.6826	met-a-476	2.42e-37	0.011	TRUE	162.91
rs11065202	C	T	C	T	0.1297	-0.1315	0.0822	0.11	met-a-476	1e-200	0.004	TRUE	1051.38
rs11065208	A	G	A	G	-0.0683	0.1649	0.2449	0.5007	met-a-476	1.17e-10	0.0106	TRUE	41.5174
rs11065360	G	A	G	A	-0.0672	0.0091	0.083	0.9127	met-a-476	4.29e-59	0.0041	TRUE	268.64
rs11065390	A	G	A	G	-0.0678	-0.0585	0.3099	0.8503	met-a-476	3.23e-09	0.0115	TRUE	34.7587
rs11610379	T	C	T	C	0.0891	0.1945	0.1761	0.2694	met-a-476	5.09e-12	0.0129	TRUE	47.7063
rs11611311	T	A	T	A	-0.0463	0.0588	0.1037	0.5703	met-a-476	1.65e-15	0.0058	TRUE	63.7244
rs1179368	C	T	C	T	0.0533	-0.1528	0.206	0.4581	met-a-476	2.83e-08	0.0096	TRUE	30.8256
rs1182946	C	A	C	A	-0.0716	-0.2015	0.2452	0.4113	met-a-476	2.49e-10	0.0113	TRUE	40.1485
rs1186055	A	C	A	C	-0.0344	-0.1197	0.0857	0.1625	met-a-476	1.3e-15	0.0043	TRUE	64
rs12304179	G	C	G	C	0.0243	0.0363	0.1435	0.8003	met-a-476	2.4e-06	0.0052	TRUE	21.8376
rs12356193	G	A	G	A	-0.0358	-0.0817	0.139	0.5567	met-a-476	5.06e-12	0.0052	TRUE	47.3979
rs12369156	A	G	A	G	-0.0724	-0.4251	0.3879	0.2731	met-a-476	8.37e-09	0.0126	TRUE	33.0169
rs12423303	G	A	G	A	-0.0403	-0.1806	0.168	0.2822	met-a-476	2.61e-06	0.0086	TRUE	21.959
rs12822898	T	C	T	C	0.1529	-0.1752	0.1355	0.196	met-a-476	6.98e-146	0.0059	TRUE	671.6
rs1493755	G	A	G	A	-0.0291	-0.0934	0.1136	0.411	met-a-476	5.34e-07	0.0058	TRUE	25.1727
rs16950755	C	G	C	G	-0.0533	-0.1082	0.148	0.4647	met-a-476	1.66e-13	0.0072	TRUE	54.8011
rs17129837	T	C	T	C	0.0443	-0.1082	0.1453	0.4563	met-a-476	6e-07	0.0089	TRUE	24.7758
rs17762815	A	G	A	G	-0.0629	0.0801	0.1696	0.636999	met-a-476	8.08e-07	0.0127	TRUE	24.5298
rs206967	T	C	T	C	-0.0323	0.0107	0.0845	0.8989	met-a-476	2.81e-07	0.0063	TRUE	26.286
rs2071190	A	T	A	T	-0.0748	0.1038	0.099	0.2944	met-a-476	8.44e-68	0.0043	TRUE	302.598
rs2469211	T	A	T	A	0.0342	0.0841	0.1215	0.4885	met-a-476	1.06e-08	0.006	TRUE	32.49
rs274567	T	C	T	C	0.024	0.2185	0.0816	0.00745504	met-a-476	6.23e-09	0.0041	TRUE	34.2653
rs3751143	C	A	C	A	0.0273	0.0339	0.1327	0.7981	met-a-476	5.07e-07	0.0054	TRUE	25.5586
rs3817190	A	T	A	T	0.0249	-0.0051	0.0854	0.9521	met-a-476	1.14e-07	0.0047	TRUE	28.0675
rs3850516	G	T	G	T	0.0376	-0.1739	0.1553	0.2626	met-a-476	9.29e-13	0.0053	TRUE	50.3297
rs4638383	C	G	C	G	-0.0702	0.027	0.1191	0.821	met-a-476	5.54e-33	0.0059	TRUE	141.57
rs4766962	T	A	T	A	-0.0516	0.121	0.0854	0.1561	met-a-476	1.7e-33	0.0043	TRUE	144
rs4767918	C	T	C	T	-0.0845	0.2458	0.0902	0.00641505	met-a-476	2.01e-109	0.0038	TRUE	494.477
rs6462769	C	T	C	T	-0.0194	0.0574	0.0861	0.5054	met-a-476	5.68e-06	0.0043	TRUE	20.3548
rs648238	G	A	G	A	-0.027	-0.0188	0.1455	0.897	met-a-476	4.53e-06	0.0059	TRUE	20.9423
rs662138	G	C	G	C	-0.0277	-0.0278	0.1149	0.809	met-a-476	8.62e-08	0.0052	TRUE	28.3761
rs6668509	A	T	A	T	0.0464	0.1338	0.1855	0.4708	met-a-476	3.05e-06	0.0099	TRUE	21.9667
rs6696978	G	A	G	A	-0.0192	-0.0325	0.0942	0.73	met-a-476	9.33e-06	0.0043	TRUE	19.9373
rs7304812	A	T	A	T	0.0819	0.0083	0.088	0.9253	met-a-476	2.99e-43	0.0059	TRUE	192.692
rs7965649	T	C	T	C	-0.0766	0.0684	0.107	0.522801	met-a-476	7.23e-50	0.0052	TRUE	216.996
rs9586807	A	T	A	T	-0.0243	-0.1095	0.0948	0.2483	met-a-476	3.37e-06	0.0052	TRUE	21.8376
rs9657933	C	A	C	A	-0.0442	-0.079	0.1361	0.5616	met-a-476	1.05e-06	0.0091	TRUE	23.5918
rs10019724	A	G	A	G	0.0388	-0.0987	0.1559	0.5266	met-a-476	4.97e-06	0.0085	TRUE	20.8365
rs10019739	C	T	C	T	0.0191	0.0159	0.0966	0.8691	met-a-476	6.45e-06	0.0042	TRUE	20.6808
rs10849846	C	T	C	T	-0.0511	-0.0739	0.1483	0.617999	met-a-476	1.34e-07	0.0097	TRUE	27.7523
rs10979172	T	C	T	C	-0.1703	0.239	0.2018	0.2361	met-a-476	9.65e-06	0.0385	TRUE	19.5663
rs11043310	T	C	T	C	-0.0629	0.2302	0.161	0.1527	met-a-476	9.88e-07	0.0129	TRUE	23.7751
rs11065176	T	C	T	C	0.1404	-0.0914	0.2235	0.6826	met-a-476	2.42e-37	0.011	TRUE	162.91
rs11065202	C	T	C	T	0.1297	-0.1315	0.0822	0.11	met-a-476	1e-200	0.004	TRUE	1051.38
rs11065208	A	G	A	G	-0.0683	0.1649	0.2449	0.5007	met-a-476	1.17e-10	0.0106	TRUE	41.5174
rs11065360	G	A	G	A	-0.0672	0.0091	0.083	0.9127	met-a-476	4.29e-59	0.0041	TRUE	268.64
rs11065390	A	G	A	G	-0.0678	-0.0585	0.3099	0.8503	met-a-476	3.23e-09	0.0115	TRUE	34.7587
rs11610379	T	C	T	C	0.0891	0.1945	0.1761	0.2694	met-a-476	5.09e-12	0.0129	TRUE	47.7063
rs11611311	T	A	T	A	-0.0463	0.0588	0.1037	0.5703	met-a-476	1.65e-15	0.0058	TRUE	63.7244
rs1179368	C	T	C	T	0.0533	-0.1528	0.206	0.4581	met-a-476	2.83e-08	0.0096	TRUE	30.8256
rs1182946	C	A	C	A	-0.0716	-0.2015	0.2452	0.4113	met-a-476	2.49e-10	0.0113	TRUE	40.1485
rs1186055	A	C	A	C	-0.0344	-0.1197	0.0857	0.1625	met-a-476	1.3e-15	0.0043	TRUE	64
rs12304179	G	C	G	C	0.0243	0.0363	0.1435	0.8003	met-a-476	2.4e-06	0.0052	TRUE	21.8376
rs12356193	G	A	G	A	-0.0358	-0.0817	0.139	0.5567	met-a-476	5.06e-12	0.0052	TRUE	47.3979
rs12369156	A	G	A	G	-0.0724	-0.4251	0.3879	0.2731	met-a-476	8.37e-09	0.0126	TRUE	33.0169
rs12423303	G	A	G	A	-0.0403	-0.1806	0.168	0.2822	met-a-476	2.61e-06	0.0086	TRUE	21.959
rs12822898	T	C	T	C	0.1529	-0.1752	0.1355	0.196	met-a-476	6.98e-146	0.0059	TRUE	671.6
rs1493755	G	A	G	A	-0.0291	-0.0934	0.1136	0.411	met-a-476	5.34e-07	0.0058	TRUE	25.1727
rs16950755	C	G	C	G	-0.0533	-0.1082	0.148	0.4647	met-a-476	1.66e-13	0.0072	TRUE	54.8011
rs17129837	T	C	T	C	0.0443	-0.1082	0.1453	0.4563	met-a-476	6e-07	0.0089	TRUE	24.7758
rs17762815	A	G	A	G	-0.0629	0.0801	0.1696	0.636999	met-a-476	8.08e-07	0.0127	TRUE	24.5298
rs206967	T	C	T	C	-0.0323	0.0107	0.0845	0.8989	met-a-476	2.81e-07	0.0063	TRUE	26.286
rs2071190	A	T	A	T	-0.0748	0.1038	0.099	0.2944	met-a-476	8.44e-68	0.0043	TRUE	302.598
rs2469211	T	A	T	A	0.0342	0.0841	0.1215	0.4885	met-a-476	1.06e-08	0.006	TRUE	32.49
rs274567	T	C	T	C	0.024	0.2185	0.0816	0.00745504	met-a-476	6.23e-09	0.0041	TRUE	34.2653
rs3751143	C	A	C	A	0.0273	0.0339	0.1327	0.7981	met-a-476	5.07e-07	0.0054	TRUE	25.5586
rs3817190	A	T	A	T	0.0249	-0.0051	0.0854	0.9521	met-a-476	1.14e-07	0.0047	TRUE	28.0675
rs3850516	G	T	G	T	0.0376	-0.1739	0.1553	0.2626	met-a-476	9.29e-13	0.0053	TRUE	50.3297
rs4638383	C	G	C	G	-0.0702	0.027	0.1191	0.821	met-a-476	5.54e-33	0.0059	TRUE	141.57
rs4766962	T	A	T	A	-0.0516	0.121	0.0854	0.1561	met-a-476	1.7e-33	0.0043	TRUE	144
rs4767918	C	T	C	T	-0.0845	0.2458	0.0902	0.00641505	met-a-476	2.01e-109	0.0038	TRUE	494.477
rs6462769	C	T	C	T	-0.0194	0.0574	0.0861	0.5054	met-a-476	5.68e-06	0.0043	TRUE	20.3548
rs648238	G	A	G	A	-0.027	-0.0188	0.1455	0.897	met-a-476	4.53e-06	0.0059	TRUE	20.9423
rs662138	G	C	G	C	-0.0277	-0.0278	0.1149	0.809	met-a-476	8.62e-08	0.0052	TRUE	28.3761
rs6668509	A	T	A	T	0.0464	0.1338	0.1855	0.4708	met-a-476	3.05e-06	0.0099	TRUE	21.9667
rs6696978	G	A	G	A	-0.0192	-0.0325	0.0942	0.73	met-a-476	9.33e-06	0.0043	TRUE	19.9373
rs7304812	A	T	A	T	0.0819	0.0083	0.088	0.9253	met-a-476	2.99e-43	0.0059	TRUE	192.692
rs7965649	T	C	T	C	-0.0766	0.0684	0.107	0.522801	met-a-476	7.23e-50	0.0052	TRUE	216.996
rs9586807	A	T	A	T	-0.0243	-0.1095	0.0948	0.2483	met-a-476	3.37e-06	0.0052	TRUE	21.8376
rs9657933	C	A	C	A	-0.0442	-0.079	0.1361	0.5616	met-a-476	1.05e-06	0.0091	TRUE	23.5918
rs10128501	G	A	G	A	-0.0108	-0.0999	0.0815	0.2204	met-a-479	5.06e-09	0.0018	TRUE	36
rs10818924	C	T	C	T	0.0087	0.0348	0.0892	0.6962	met-a-479	2.35e-06	0.0018	TRUE	23.3611
rs11004179	C	T	C	T	-0.0274	-0.3039	0.2457	0.2162	met-a-479	8.15e-06	0.0061	TRUE	20.1763
rs11057695	T	C	T	C	0.0255	0.0603	0.1367	0.6593	met-a-479	8.01e-06	0.0057	TRUE	20.0139
rs11239545	A	T	A	T	-0.0132	0.0511	0.09	0.570401	met-a-479	5.22e-07	0.0026	TRUE	25.7751
rs12029258	A	C	A	G	0.0132	-0.9827	1.6614	0.554201	met-a-479	1.57e-06	0.0028	FALSE	22.2245
rs12029258	A	C	A	C	0.0132	0.1368	0.0982	0.1636	met-a-479	1.57e-06	0.0028	TRUE	22.2245
rs12202350	C	T	C	T	-0.0191	-0.139	0.1473	0.3453	met-a-479	1.14e-07	0.0036	TRUE	28.1489
rs12356193	G	A	G	A	-0.0328	-0.0817	0.139	0.5567	met-a-479	1.96e-33	0.0027	TRUE	147.578
rs1420139	C	G	C	G	-0.0125	-0.0979	0.0969	0.3125	met-a-479	3.28e-06	0.0027	TRUE	21.4335
rs17015424	G	C	G	C	0.022	-0.0727	0.0839	0.3863	met-a-479	4.1e-06	0.0048	TRUE	21.0069
rs2715311	A	G	A	G	-0.0107	-0.0416	0.0816	0.6097	met-a-479	6.57e-09	0.0018	TRUE	35.3364
rs2760353	G	A	G	A	-0.0313	-0.5018	0.3273	0.1252	met-a-479	6.06e-07	0.0063	TRUE	24.6835
rs2893807	C	T	C	T	0.0141	0.0803	0.0817	0.3256	met-a-479	5.95e-08	0.0026	TRUE	29.4098
rs3798167	T	G	T	G	0.0121	0.0412	0.1119	0.713001	met-a-479	5.19e-06	0.0027	TRUE	20.0837
rs3798180	G	A	G	A	0.01	-0.1474	0.0843	0.0803304	met-a-479	5.8e-08	0.0018	TRUE	30.8642
rs3829681	G	C	G	C	0.0141	0.0303	0.0963	0.7526	met-a-479	1.68e-07	0.0027	TRUE	27.2716
rs3916443	C	T	C	T	-0.0129	-0.2821	0.0963	0.003404	met-a-479	3.39e-12	0.0019	TRUE	46.097
rs6102466	C	T	C	T	0.0264	0.0477	0.0853	0.576301	met-a-479	2.68e-06	0.0056	TRUE	22.2245
rs662138	G	C	G	C	-0.0206	-0.0278	0.1149	0.809	met-a-479	3.15e-14	0.0027	TRUE	58.2112
rs6881997	G	A	G	A	0.0127	-0.0289	0.11	0.7927	met-a-479	2.06e-06	0.0027	TRUE	22.1248
rs8181126	T	C	T	C	0.0094	-0.0308	0.0878	0.7256	met-a-479	2.73e-07	0.0018	TRUE	27.2716
rs9399110	T	C	T	C	0.0267	0.3879	0.2919	0.1839	met-a-479	4.29e-07	0.0053	TRUE	25.3788
rs9450092	G	A	G	A	-0.037	0.04	0.1448	0.7824	met-a-479	2.11e-07	0.0071	TRUE	27.1573
rs9503551	A	G	A	G	-0.0164	-0.0568	0.2399	0.8127	met-a-479	3.75e-06	0.0036	TRUE	20.7531
rs10128501	G	A	G	A	-0.0108	-0.0999	0.0815	0.2204	met-a-479	5.06e-09	0.0018	TRUE	36
rs10818924	C	T	C	T	0.0087	0.0348	0.0892	0.6962	met-a-479	2.35e-06	0.0018	TRUE	23.3611
rs11004179	C	T	C	T	-0.0274	-0.3039	0.2457	0.2162	met-a-479	8.15e-06	0.0061	TRUE	20.1763
rs11057695	T	C	T	C	0.0255	0.0603	0.1367	0.6593	met-a-479	8.01e-06	0.0057	TRUE	20.0139
rs11239545	A	T	A	T	-0.0132	0.0511	0.09	0.570401	met-a-479	5.22e-07	0.0026	TRUE	25.7751
rs12029258	A	C	A	G	0.0132	-0.9827	1.6614	0.554201	met-a-479	1.57e-06	0.0028	FALSE	22.2245
rs12029258	A	C	A	C	0.0132	0.1368	0.0982	0.1636	met-a-479	1.57e-06	0.0028	TRUE	22.2245
rs12202350	C	T	C	T	-0.0191	-0.139	0.1473	0.3453	met-a-479	1.14e-07	0.0036	TRUE	28.1489
rs12356193	G	A	G	A	-0.0328	-0.0817	0.139	0.5567	met-a-479	1.96e-33	0.0027	TRUE	147.578
rs1420139	C	G	C	G	-0.0125	-0.0979	0.0969	0.3125	met-a-479	3.28e-06	0.0027	TRUE	21.4335
rs17015424	G	C	G	C	0.022	-0.0727	0.0839	0.3863	met-a-479	4.1e-06	0.0048	TRUE	21.0069
rs2715311	A	G	A	G	-0.0107	-0.0416	0.0816	0.6097	met-a-479	6.57e-09	0.0018	TRUE	35.3364
rs2760353	G	A	G	A	-0.0313	-0.5018	0.3273	0.1252	met-a-479	6.06e-07	0.0063	TRUE	24.6835
rs2893807	C	T	C	T	0.0141	0.0803	0.0817	0.3256	met-a-479	5.95e-08	0.0026	TRUE	29.4098
rs3798167	T	G	T	G	0.0121	0.0412	0.1119	0.713001	met-a-479	5.19e-06	0.0027	TRUE	20.0837
rs3798180	G	A	G	A	0.01	-0.1474	0.0843	0.0803304	met-a-479	5.8e-08	0.0018	TRUE	30.8642
rs3829681	G	C	G	C	0.0141	0.0303	0.0963	0.7526	met-a-479	1.68e-07	0.0027	TRUE	27.2716
rs3916443	C	T	C	T	-0.0129	-0.2821	0.0963	0.003404	met-a-479	3.39e-12	0.0019	TRUE	46.097
rs6102466	C	T	C	T	0.0264	0.0477	0.0853	0.576301	met-a-479	2.68e-06	0.0056	TRUE	22.2245
rs662138	G	C	G	C	-0.0206	-0.0278	0.1149	0.809	met-a-479	3.15e-14	0.0027	TRUE	58.2112
rs6881997	G	A	G	A	0.0127	-0.0289	0.11	0.7927	met-a-479	2.06e-06	0.0027	TRUE	22.1248
rs8181126	T	C	T	C	0.0094	-0.0308	0.0878	0.7256	met-a-479	2.73e-07	0.0018	TRUE	27.2716
rs9399110	T	C	T	C	0.0267	0.3879	0.2919	0.1839	met-a-479	4.29e-07	0.0053	TRUE	25.3788
rs9450092	G	A	G	A	-0.037	0.04	0.1448	0.7824	met-a-479	2.11e-07	0.0071	TRUE	27.1573
rs9503551	A	G	A	G	-0.0164	-0.0568	0.2399	0.8127	met-a-479	3.75e-06	0.0036	TRUE	20.7531
rs10128501	G	A	G	A	-0.0108	-0.0999	0.0815	0.2204	met-a-479	5.06e-09	0.0018	TRUE	36
rs10818924	C	T	C	T	0.0087	0.0348	0.0892	0.6962	met-a-479	2.35e-06	0.0018	TRUE	23.3611
rs11004179	C	T	C	T	-0.0274	-0.3039	0.2457	0.2162	met-a-479	8.15e-06	0.0061	TRUE	20.1763
rs11057695	T	C	T	C	0.0255	0.0603	0.1367	0.6593	met-a-479	8.01e-06	0.0057	TRUE	20.0139
rs11239545	A	T	A	T	-0.0132	0.0511	0.09	0.570401	met-a-479	5.22e-07	0.0026	TRUE	25.7751
rs12029258	A	C	A	G	0.0132	-0.9827	1.6614	0.554201	met-a-479	1.57e-06	0.0028	FALSE	22.2245
rs12029258	A	C	A	C	0.0132	0.1368	0.0982	0.1636	met-a-479	1.57e-06	0.0028	TRUE	22.2245
rs12202350	C	T	C	T	-0.0191	-0.139	0.1473	0.3453	met-a-479	1.14e-07	0.0036	TRUE	28.1489
rs12356193	G	A	G	A	-0.0328	-0.0817	0.139	0.5567	met-a-479	1.96e-33	0.0027	TRUE	147.578
rs1420139	C	G	C	G	-0.0125	-0.0979	0.0969	0.3125	met-a-479	3.28e-06	0.0027	TRUE	21.4335
rs17015424	G	C	G	C	0.022	-0.0727	0.0839	0.3863	met-a-479	4.1e-06	0.0048	TRUE	21.0069
rs2715311	A	G	A	G	-0.0107	-0.0416	0.0816	0.6097	met-a-479	6.57e-09	0.0018	TRUE	35.3364
rs2760353	G	A	G	A	-0.0313	-0.5018	0.3273	0.1252	met-a-479	6.06e-07	0.0063	TRUE	24.6835
rs2893807	C	T	C	T	0.0141	0.0803	0.0817	0.3256	met-a-479	5.95e-08	0.0026	TRUE	29.4098
rs3798167	T	G	T	G	0.0121	0.0412	0.1119	0.713001	met-a-479	5.19e-06	0.0027	TRUE	20.0837
rs3798180	G	A	G	A	0.01	-0.1474	0.0843	0.0803304	met-a-479	5.8e-08	0.0018	TRUE	30.8642
rs3829681	G	C	G	C	0.0141	0.0303	0.0963	0.7526	met-a-479	1.68e-07	0.0027	TRUE	27.2716
rs3916443	C	T	C	T	-0.0129	-0.2821	0.0963	0.003404	met-a-479	3.39e-12	0.0019	TRUE	46.097
rs6102466	C	T	C	T	0.0264	0.0477	0.0853	0.576301	met-a-479	2.68e-06	0.0056	TRUE	22.2245
rs662138	G	C	G	C	-0.0206	-0.0278	0.1149	0.809	met-a-479	3.15e-14	0.0027	TRUE	58.2112
rs6881997	G	A	G	A	0.0127	-0.0289	0.11	0.7927	met-a-479	2.06e-06	0.0027	TRUE	22.1248
rs8181126	T	C	T	C	0.0094	-0.0308	0.0878	0.7256	met-a-479	2.73e-07	0.0018	TRUE	27.2716
rs9399110	T	C	T	C	0.0267	0.3879	0.2919	0.1839	met-a-479	4.29e-07	0.0053	TRUE	25.3788
rs9450092	G	A	G	A	-0.037	0.04	0.1448	0.7824	met-a-479	2.11e-07	0.0071	TRUE	27.1573
rs9503551	A	G	A	G	-0.0164	-0.0568	0.2399	0.8127	met-a-479	3.75e-06	0.0036	TRUE	20.7531
rs10128501	G	A	G	A	-0.0108	-0.0999	0.0815	0.2204	met-a-479	5.06e-09	0.0018	TRUE	36
rs10818924	C	T	C	T	0.0087	0.0348	0.0892	0.6962	met-a-479	2.35e-06	0.0018	TRUE	23.3611
rs11004179	C	T	C	T	-0.0274	-0.3039	0.2457	0.2162	met-a-479	8.15e-06	0.0061	TRUE	20.1763
rs11057695	T	C	T	C	0.0255	0.0603	0.1367	0.6593	met-a-479	8.01e-06	0.0057	TRUE	20.0139
rs11239545	A	T	A	T	-0.0132	0.0511	0.09	0.570401	met-a-479	5.22e-07	0.0026	TRUE	25.7751
rs12029258	A	C	A	G	0.0132	-0.9827	1.6614	0.554201	met-a-479	1.57e-06	0.0028	FALSE	22.2245
rs12029258	A	C	A	C	0.0132	0.1368	0.0982	0.1636	met-a-479	1.57e-06	0.0028	TRUE	22.2245
rs12202350	C	T	C	T	-0.0191	-0.139	0.1473	0.3453	met-a-479	1.14e-07	0.0036	TRUE	28.1489
rs12356193	G	A	G	A	-0.0328	-0.0817	0.139	0.5567	met-a-479	1.96e-33	0.0027	TRUE	147.578
rs1420139	C	G	C	G	-0.0125	-0.0979	0.0969	0.3125	met-a-479	3.28e-06	0.0027	TRUE	21.4335
rs17015424	G	C	G	C	0.022	-0.0727	0.0839	0.3863	met-a-479	4.1e-06	0.0048	TRUE	21.0069
rs2715311	A	G	A	G	-0.0107	-0.0416	0.0816	0.6097	met-a-479	6.57e-09	0.0018	TRUE	35.3364
rs2760353	G	A	G	A	-0.0313	-0.5018	0.3273	0.1252	met-a-479	6.06e-07	0.0063	TRUE	24.6835
rs2893807	C	T	C	T	0.0141	0.0803	0.0817	0.3256	met-a-479	5.95e-08	0.0026	TRUE	29.4098
rs3798167	T	G	T	G	0.0121	0.0412	0.1119	0.713001	met-a-479	5.19e-06	0.0027	TRUE	20.0837
rs3798180	G	A	G	A	0.01	-0.1474	0.0843	0.0803304	met-a-479	5.8e-08	0.0018	TRUE	30.8642
rs3829681	G	C	G	C	0.0141	0.0303	0.0963	0.7526	met-a-479	1.68e-07	0.0027	TRUE	27.2716
rs3916443	C	T	C	T	-0.0129	-0.2821	0.0963	0.003404	met-a-479	3.39e-12	0.0019	TRUE	46.097
rs6102466	C	T	C	T	0.0264	0.0477	0.0853	0.576301	met-a-479	2.68e-06	0.0056	TRUE	22.2245
rs662138	G	C	G	C	-0.0206	-0.0278	0.1149	0.809	met-a-479	3.15e-14	0.0027	TRUE	58.2112
rs6881997	G	A	G	A	0.0127	-0.0289	0.11	0.7927	met-a-479	2.06e-06	0.0027	TRUE	22.1248
rs8181126	T	C	T	C	0.0094	-0.0308	0.0878	0.7256	met-a-479	2.73e-07	0.0018	TRUE	27.2716
rs9399110	T	C	T	C	0.0267	0.3879	0.2919	0.1839	met-a-479	4.29e-07	0.0053	TRUE	25.3788
rs9450092	G	A	G	A	-0.037	0.04	0.1448	0.7824	met-a-479	2.11e-07	0.0071	TRUE	27.1573
rs9503551	A	G	A	G	-0.0164	-0.0568	0.2399	0.8127	met-a-479	3.75e-06	0.0036	TRUE	20.7531
rs10128501	G	A	G	A	-0.0108	-0.0999	0.0815	0.2204	met-a-479	5.06e-09	0.0018	TRUE	36
rs10818924	C	T	C	T	0.0087	0.0348	0.0892	0.6962	met-a-479	2.35e-06	0.0018	TRUE	23.3611
rs11004179	C	T	C	T	-0.0274	-0.3039	0.2457	0.2162	met-a-479	8.15e-06	0.0061	TRUE	20.1763
rs11057695	T	C	T	C	0.0255	0.0603	0.1367	0.6593	met-a-479	8.01e-06	0.0057	TRUE	20.0139
rs11239545	A	T	A	T	-0.0132	0.0511	0.09	0.570401	met-a-479	5.22e-07	0.0026	TRUE	25.7751
rs12029258	A	C	A	G	0.0132	-0.9827	1.6614	0.554201	met-a-479	1.57e-06	0.0028	FALSE	22.2245
rs12029258	A	C	A	C	0.0132	0.1368	0.0982	0.1636	met-a-479	1.57e-06	0.0028	TRUE	22.2245
rs12202350	C	T	C	T	-0.0191	-0.139	0.1473	0.3453	met-a-479	1.14e-07	0.0036	TRUE	28.1489
rs12356193	G	A	G	A	-0.0328	-0.0817	0.139	0.5567	met-a-479	1.96e-33	0.0027	TRUE	147.578
rs1420139	C	G	C	G	-0.0125	-0.0979	0.0969	0.3125	met-a-479	3.28e-06	0.0027	TRUE	21.4335
rs17015424	G	C	G	C	0.022	-0.0727	0.0839	0.3863	met-a-479	4.1e-06	0.0048	TRUE	21.0069
rs2715311	A	G	A	G	-0.0107	-0.0416	0.0816	0.6097	met-a-479	6.57e-09	0.0018	TRUE	35.3364
rs2760353	G	A	G	A	-0.0313	-0.5018	0.3273	0.1252	met-a-479	6.06e-07	0.0063	TRUE	24.6835
rs2893807	C	T	C	T	0.0141	0.0803	0.0817	0.3256	met-a-479	5.95e-08	0.0026	TRUE	29.4098
rs3798167	T	G	T	G	0.0121	0.0412	0.1119	0.713001	met-a-479	5.19e-06	0.0027	TRUE	20.0837
rs3798180	G	A	G	A	0.01	-0.1474	0.0843	0.0803304	met-a-479	5.8e-08	0.0018	TRUE	30.8642
rs3829681	G	C	G	C	0.0141	0.0303	0.0963	0.7526	met-a-479	1.68e-07	0.0027	TRUE	27.2716
rs3916443	C	T	C	T	-0.0129	-0.2821	0.0963	0.003404	met-a-479	3.39e-12	0.0019	TRUE	46.097
rs6102466	C	T	C	T	0.0264	0.0477	0.0853	0.576301	met-a-479	2.68e-06	0.0056	TRUE	22.2245
rs662138	G	C	G	C	-0.0206	-0.0278	0.1149	0.809	met-a-479	3.15e-14	0.0027	TRUE	58.2112
rs6881997	G	A	G	A	0.0127	-0.0289	0.11	0.7927	met-a-479	2.06e-06	0.0027	TRUE	22.1248
rs8181126	T	C	T	C	0.0094	-0.0308	0.0878	0.7256	met-a-479	2.73e-07	0.0018	TRUE	27.2716
rs9399110	T	C	T	C	0.0267	0.3879	0.2919	0.1839	met-a-479	4.29e-07	0.0053	TRUE	25.3788
rs9450092	G	A	G	A	-0.037	0.04	0.1448	0.7824	met-a-479	2.11e-07	0.0071	TRUE	27.1573
rs9503551	A	G	A	G	-0.0164	-0.0568	0.2399	0.8127	met-a-479	3.75e-06	0.0036	TRUE	20.7531
rs10491431	A	C	A	C	0.0807	-0.1466	0.1205	0.2239	met-a-517	1.59e-11	0.012	TRUE	45.2256
rs11174493	A	G	A	G	0.0433	-0.1091	0.0872	0.2109	met-a-517	1.42e-06	0.009	TRUE	23.1468
rs11236092	T	G	T	G	-0.0537	-0.079	0.0907	0.3833	met-a-517	7.67e-06	0.012	TRUE	20.0256
rs12238989	C	G	C	G	0.1605	-0.3556	0.2603	0.172	met-a-517	7.5e-06	0.0358	TRUE	20.0994
rs1574228	G	A	G	A	0.0432	-0.0628	0.0886	0.4787	met-a-517	4.23e-06	0.0094	TRUE	21.1209
rs1940528	G	A	G	A	0.0649	0.0627	0.0922	0.4962	met-a-517	4.71e-06	0.0142	TRUE	20.8888
rs212099	A	T	A	T	-0.0634	-0.0383	0.1063	0.718701	met-a-517	5.62e-08	0.0117	TRUE	29.3634
rs2567308	G	A	G	A	0.0524	0.0366	0.0939	0.6968	met-a-517	5.86e-06	0.0116	TRUE	20.4055
rs2592288	C	T	C	T	0.092	0.0848	0.2684	0.752	met-a-517	3.15e-06	0.0197	TRUE	21.8094
rs4149081	A	G	A	G	0.068	-0.2034	0.0891	0.0224698	met-a-517	5.22e-10	0.0109	TRUE	38.9193
rs532	G	A	G	A	0.0475	-0.1547	0.0968	0.1099	met-a-517	6.06e-06	0.0105	TRUE	20.4649
rs6464572	G	C	G	C	0.0551	-0.1229	0.0975	0.2073	met-a-517	5.65e-06	0.0121	TRUE	20.7364
rs9751295	G	A	G	A	0.1428	-0.8172	0.3258	0.01213	met-a-517	4.67e-06	0.0312	TRUE	20.9482
rs10491431	A	C	A	C	0.0807	-0.1466	0.1205	0.2239	met-a-517	1.59e-11	0.012	TRUE	45.2256
rs11174493	A	G	A	G	0.0433	-0.1091	0.0872	0.2109	met-a-517	1.42e-06	0.009	TRUE	23.1468
rs11236092	T	G	T	G	-0.0537	-0.079	0.0907	0.3833	met-a-517	7.67e-06	0.012	TRUE	20.0256
rs12238989	C	G	C	G	0.1605	-0.3556	0.2603	0.172	met-a-517	7.5e-06	0.0358	TRUE	20.0994
rs1574228	G	A	G	A	0.0432	-0.0628	0.0886	0.4787	met-a-517	4.23e-06	0.0094	TRUE	21.1209
rs1940528	G	A	G	A	0.0649	0.0627	0.0922	0.4962	met-a-517	4.71e-06	0.0142	TRUE	20.8888
rs212099	A	T	A	T	-0.0634	-0.0383	0.1063	0.718701	met-a-517	5.62e-08	0.0117	TRUE	29.3634
rs2567308	G	A	G	A	0.0524	0.0366	0.0939	0.6968	met-a-517	5.86e-06	0.0116	TRUE	20.4055
rs2592288	C	T	C	T	0.092	0.0848	0.2684	0.752	met-a-517	3.15e-06	0.0197	TRUE	21.8094
rs4149081	A	G	A	G	0.068	-0.2034	0.0891	0.0224698	met-a-517	5.22e-10	0.0109	TRUE	38.9193
rs532	G	A	G	A	0.0475	-0.1547	0.0968	0.1099	met-a-517	6.06e-06	0.0105	TRUE	20.4649
rs6464572	G	C	G	C	0.0551	-0.1229	0.0975	0.2073	met-a-517	5.65e-06	0.0121	TRUE	20.7364
rs9751295	G	A	G	A	0.1428	-0.8172	0.3258	0.01213	met-a-517	4.67e-06	0.0312	TRUE	20.9482
rs10491431	A	C	A	C	0.0807	-0.1466	0.1205	0.2239	met-a-517	1.59e-11	0.012	TRUE	45.2256
rs11174493	A	G	A	G	0.0433	-0.1091	0.0872	0.2109	met-a-517	1.42e-06	0.009	TRUE	23.1468
rs11236092	T	G	T	G	-0.0537	-0.079	0.0907	0.3833	met-a-517	7.67e-06	0.012	TRUE	20.0256
rs12238989	C	G	C	G	0.1605	-0.3556	0.2603	0.172	met-a-517	7.5e-06	0.0358	TRUE	20.0994
rs1574228	G	A	G	A	0.0432	-0.0628	0.0886	0.4787	met-a-517	4.23e-06	0.0094	TRUE	21.1209
rs1940528	G	A	G	A	0.0649	0.0627	0.0922	0.4962	met-a-517	4.71e-06	0.0142	TRUE	20.8888
rs212099	A	T	A	T	-0.0634	-0.0383	0.1063	0.718701	met-a-517	5.62e-08	0.0117	TRUE	29.3634
rs2567308	G	A	G	A	0.0524	0.0366	0.0939	0.6968	met-a-517	5.86e-06	0.0116	TRUE	20.4055
rs2592288	C	T	C	T	0.092	0.0848	0.2684	0.752	met-a-517	3.15e-06	0.0197	TRUE	21.8094
rs4149081	A	G	A	G	0.068	-0.2034	0.0891	0.0224698	met-a-517	5.22e-10	0.0109	TRUE	38.9193
rs532	G	A	G	A	0.0475	-0.1547	0.0968	0.1099	met-a-517	6.06e-06	0.0105	TRUE	20.4649
rs6464572	G	C	G	C	0.0551	-0.1229	0.0975	0.2073	met-a-517	5.65e-06	0.0121	TRUE	20.7364
rs9751295	G	A	G	A	0.1428	-0.8172	0.3258	0.01213	met-a-517	4.67e-06	0.0312	TRUE	20.9482
rs10491431	A	C	A	C	0.0807	-0.1466	0.1205	0.2239	met-a-517	1.59e-11	0.012	TRUE	45.2256
rs11174493	A	G	A	G	0.0433	-0.1091	0.0872	0.2109	met-a-517	1.42e-06	0.009	TRUE	23.1468
rs11236092	T	G	T	G	-0.0537	-0.079	0.0907	0.3833	met-a-517	7.67e-06	0.012	TRUE	20.0256
rs12238989	C	G	C	G	0.1605	-0.3556	0.2603	0.172	met-a-517	7.5e-06	0.0358	TRUE	20.0994
rs1574228	G	A	G	A	0.0432	-0.0628	0.0886	0.4787	met-a-517	4.23e-06	0.0094	TRUE	21.1209
rs1940528	G	A	G	A	0.0649	0.0627	0.0922	0.4962	met-a-517	4.71e-06	0.0142	TRUE	20.8888
rs212099	A	T	A	T	-0.0634	-0.0383	0.1063	0.718701	met-a-517	5.62e-08	0.0117	TRUE	29.3634
rs2567308	G	A	G	A	0.0524	0.0366	0.0939	0.6968	met-a-517	5.86e-06	0.0116	TRUE	20.4055
rs2592288	C	T	C	T	0.092	0.0848	0.2684	0.752	met-a-517	3.15e-06	0.0197	TRUE	21.8094
rs4149081	A	G	A	G	0.068	-0.2034	0.0891	0.0224698	met-a-517	5.22e-10	0.0109	TRUE	38.9193
rs532	G	A	G	A	0.0475	-0.1547	0.0968	0.1099	met-a-517	6.06e-06	0.0105	TRUE	20.4649
rs6464572	G	C	G	C	0.0551	-0.1229	0.0975	0.2073	met-a-517	5.65e-06	0.0121	TRUE	20.7364
rs9751295	G	A	G	A	0.1428	-0.8172	0.3258	0.01213	met-a-517	4.67e-06	0.0312	TRUE	20.9482
rs10491431	A	C	A	C	0.0807	-0.1466	0.1205	0.2239	met-a-517	1.59e-11	0.012	TRUE	45.2256
rs11174493	A	G	A	G	0.0433	-0.1091	0.0872	0.2109	met-a-517	1.42e-06	0.009	TRUE	23.1468
rs11236092	T	G	T	G	-0.0537	-0.079	0.0907	0.3833	met-a-517	7.67e-06	0.012	TRUE	20.0256
rs12238989	C	G	C	G	0.1605	-0.3556	0.2603	0.172	met-a-517	7.5e-06	0.0358	TRUE	20.0994
rs1574228	G	A	G	A	0.0432	-0.0628	0.0886	0.4787	met-a-517	4.23e-06	0.0094	TRUE	21.1209
rs1940528	G	A	G	A	0.0649	0.0627	0.0922	0.4962	met-a-517	4.71e-06	0.0142	TRUE	20.8888
rs212099	A	T	A	T	-0.0634	-0.0383	0.1063	0.718701	met-a-517	5.62e-08	0.0117	TRUE	29.3634
rs2567308	G	A	G	A	0.0524	0.0366	0.0939	0.6968	met-a-517	5.86e-06	0.0116	TRUE	20.4055
rs2592288	C	T	C	T	0.092	0.0848	0.2684	0.752	met-a-517	3.15e-06	0.0197	TRUE	21.8094
rs4149081	A	G	A	G	0.068	-0.2034	0.0891	0.0224698	met-a-517	5.22e-10	0.0109	TRUE	38.9193
rs532	G	A	G	A	0.0475	-0.1547	0.0968	0.1099	met-a-517	6.06e-06	0.0105	TRUE	20.4649
rs6464572	G	C	G	C	0.0551	-0.1229	0.0975	0.2073	met-a-517	5.65e-06	0.0121	TRUE	20.7364
rs9751295	G	A	G	A	0.1428	-0.8172	0.3258	0.01213	met-a-517	4.67e-06	0.0312	TRUE	20.9482
rs10431893	A	G	A	G	-0.0454	-0.0615	0.1404	0.661301	met-a-521	4.92e-06	0.0099	TRUE	21.0301
rs11073264	C	T	C	T	-0.0248	-0.1354	0.0823	0.0998206	met-a-521	5.26e-06	0.0054	TRUE	21.0919
rs11647589	G	A	G	A	-0.0404	-0.0184	0.0894	0.8368	met-a-521	1.3e-17	0.0047	TRUE	73.8868
rs12187097	A	G	A	G	0.0295	0.1941	0.1252	0.1212	met-a-521	7.1e-06	0.0066	TRUE	19.9782
rs13024834	A	G	A	G	-0.0209	0.0093	0.0972	0.9239	met-a-521	9.32e-06	0.0047	TRUE	19.7741
rs17260438	A	G	A	G	-0.0269	0.0768	0.1265	0.5439	met-a-521	2.15e-06	0.0057	TRUE	22.2718
rs17429004	G	A	G	A	0.0367	0.1774	0.1336	0.1841	met-a-521	6.65e-06	0.0081	TRUE	20.5287
rs17660864	G	A	G	A	-0.175	-0.1979	0.1983	0.3182	met-a-521	4.37e-07	0.0346	TRUE	25.5814
rs3729621	G	A	G	A	-0.0503	-0.0356	0.1773	0.8411	met-a-521	4.92e-06	0.011	TRUE	20.9098
rs727878	T	C	T	C	0.0247	0.1723	0.0858	0.04469	met-a-521	7.2e-06	0.0055	TRUE	20.1683
rs7520193	A	C	A	C	0.0283	0.0249	0.1081	0.8179	met-a-521	4.55e-07	0.0056	TRUE	25.5386
rs9277015	A	G	A	G	0.024	-0.0205	0.0884	0.8169	met-a-521	1.59e-06	0.005	TRUE	23.04
rs10431893	A	G	A	G	-0.0454	-0.0615	0.1404	0.661301	met-a-521	4.92e-06	0.0099	TRUE	21.0301
rs11073264	C	T	C	T	-0.0248	-0.1354	0.0823	0.0998206	met-a-521	5.26e-06	0.0054	TRUE	21.0919
rs11647589	G	A	G	A	-0.0404	-0.0184	0.0894	0.8368	met-a-521	1.3e-17	0.0047	TRUE	73.8868
rs12187097	A	G	A	G	0.0295	0.1941	0.1252	0.1212	met-a-521	7.1e-06	0.0066	TRUE	19.9782
rs13024834	A	G	A	G	-0.0209	0.0093	0.0972	0.9239	met-a-521	9.32e-06	0.0047	TRUE	19.7741
rs17260438	A	G	A	G	-0.0269	0.0768	0.1265	0.5439	met-a-521	2.15e-06	0.0057	TRUE	22.2718
rs17429004	G	A	G	A	0.0367	0.1774	0.1336	0.1841	met-a-521	6.65e-06	0.0081	TRUE	20.5287
rs17660864	G	A	G	A	-0.175	-0.1979	0.1983	0.3182	met-a-521	4.37e-07	0.0346	TRUE	25.5814
rs3729621	G	A	G	A	-0.0503	-0.0356	0.1773	0.8411	met-a-521	4.92e-06	0.011	TRUE	20.9098
rs727878	T	C	T	C	0.0247	0.1723	0.0858	0.04469	met-a-521	7.2e-06	0.0055	TRUE	20.1683
rs7520193	A	C	A	C	0.0283	0.0249	0.1081	0.8179	met-a-521	4.55e-07	0.0056	TRUE	25.5386
rs9277015	A	G	A	G	0.024	-0.0205	0.0884	0.8169	met-a-521	1.59e-06	0.005	TRUE	23.04
rs10431893	A	G	A	G	-0.0454	-0.0615	0.1404	0.661301	met-a-521	4.92e-06	0.0099	TRUE	21.0301
rs11073264	C	T	C	T	-0.0248	-0.1354	0.0823	0.0998206	met-a-521	5.26e-06	0.0054	TRUE	21.0919
rs11647589	G	A	G	A	-0.0404	-0.0184	0.0894	0.8368	met-a-521	1.3e-17	0.0047	TRUE	73.8868
rs12187097	A	G	A	G	0.0295	0.1941	0.1252	0.1212	met-a-521	7.1e-06	0.0066	TRUE	19.9782
rs13024834	A	G	A	G	-0.0209	0.0093	0.0972	0.9239	met-a-521	9.32e-06	0.0047	TRUE	19.7741
rs17260438	A	G	A	G	-0.0269	0.0768	0.1265	0.5439	met-a-521	2.15e-06	0.0057	TRUE	22.2718
rs17429004	G	A	G	A	0.0367	0.1774	0.1336	0.1841	met-a-521	6.65e-06	0.0081	TRUE	20.5287
rs17660864	G	A	G	A	-0.175	-0.1979	0.1983	0.3182	met-a-521	4.37e-07	0.0346	TRUE	25.5814
rs3729621	G	A	G	A	-0.0503	-0.0356	0.1773	0.8411	met-a-521	4.92e-06	0.011	TRUE	20.9098
rs727878	T	C	T	C	0.0247	0.1723	0.0858	0.04469	met-a-521	7.2e-06	0.0055	TRUE	20.1683
rs7520193	A	C	A	C	0.0283	0.0249	0.1081	0.8179	met-a-521	4.55e-07	0.0056	TRUE	25.5386
rs9277015	A	G	A	G	0.024	-0.0205	0.0884	0.8169	met-a-521	1.59e-06	0.005	TRUE	23.04
rs10431893	A	G	A	G	-0.0454	-0.0615	0.1404	0.661301	met-a-521	4.92e-06	0.0099	TRUE	21.0301
rs11073264	C	T	C	T	-0.0248	-0.1354	0.0823	0.0998206	met-a-521	5.26e-06	0.0054	TRUE	21.0919
rs11647589	G	A	G	A	-0.0404	-0.0184	0.0894	0.8368	met-a-521	1.3e-17	0.0047	TRUE	73.8868
rs12187097	A	G	A	G	0.0295	0.1941	0.1252	0.1212	met-a-521	7.1e-06	0.0066	TRUE	19.9782
rs13024834	A	G	A	G	-0.0209	0.0093	0.0972	0.9239	met-a-521	9.32e-06	0.0047	TRUE	19.7741
rs17260438	A	G	A	G	-0.0269	0.0768	0.1265	0.5439	met-a-521	2.15e-06	0.0057	TRUE	22.2718
rs17429004	G	A	G	A	0.0367	0.1774	0.1336	0.1841	met-a-521	6.65e-06	0.0081	TRUE	20.5287
rs17660864	G	A	G	A	-0.175	-0.1979	0.1983	0.3182	met-a-521	4.37e-07	0.0346	TRUE	25.5814
rs3729621	G	A	G	A	-0.0503	-0.0356	0.1773	0.8411	met-a-521	4.92e-06	0.011	TRUE	20.9098
rs727878	T	C	T	C	0.0247	0.1723	0.0858	0.04469	met-a-521	7.2e-06	0.0055	TRUE	20.1683
rs7520193	A	C	A	C	0.0283	0.0249	0.1081	0.8179	met-a-521	4.55e-07	0.0056	TRUE	25.5386
rs9277015	A	G	A	G	0.024	-0.0205	0.0884	0.8169	met-a-521	1.59e-06	0.005	TRUE	23.04
rs10431893	A	G	A	G	-0.0454	-0.0615	0.1404	0.661301	met-a-521	4.92e-06	0.0099	TRUE	21.0301
rs11073264	C	T	C	T	-0.0248	-0.1354	0.0823	0.0998206	met-a-521	5.26e-06	0.0054	TRUE	21.0919
rs11647589	G	A	G	A	-0.0404	-0.0184	0.0894	0.8368	met-a-521	1.3e-17	0.0047	TRUE	73.8868
rs12187097	A	G	A	G	0.0295	0.1941	0.1252	0.1212	met-a-521	7.1e-06	0.0066	TRUE	19.9782
rs13024834	A	G	A	G	-0.0209	0.0093	0.0972	0.9239	met-a-521	9.32e-06	0.0047	TRUE	19.7741
rs17260438	A	G	A	G	-0.0269	0.0768	0.1265	0.5439	met-a-521	2.15e-06	0.0057	TRUE	22.2718
rs17429004	G	A	G	A	0.0367	0.1774	0.1336	0.1841	met-a-521	6.65e-06	0.0081	TRUE	20.5287
rs17660864	G	A	G	A	-0.175	-0.1979	0.1983	0.3182	met-a-521	4.37e-07	0.0346	TRUE	25.5814
rs3729621	G	A	G	A	-0.0503	-0.0356	0.1773	0.8411	met-a-521	4.92e-06	0.011	TRUE	20.9098
rs727878	T	C	T	C	0.0247	0.1723	0.0858	0.04469	met-a-521	7.2e-06	0.0055	TRUE	20.1683
rs7520193	A	C	A	C	0.0283	0.0249	0.1081	0.8179	met-a-521	4.55e-07	0.0056	TRUE	25.5386
rs9277015	A	G	A	G	0.024	-0.0205	0.0884	0.8169	met-a-521	1.59e-06	0.005	TRUE	23.04
rs10107576	C	G	C	G	0.046	0.0512	0.1103	0.6427	met-a-528	8.75e-06	0.0104	TRUE	19.5636
rs10505870	A	G	A	G	0.0654	-0.0769	0.1017	0.4492	met-a-528	3.13e-20	0.0071	TRUE	84.8475
rs10520327	G	A	G	A	0.032	-0.0894	0.0874	0.3064	met-a-528	3.27e-06	0.0069	TRUE	21.5081
rs10841797	A	G	A	G	-0.0604	0.074	0.0856	0.3874	met-a-528	2.44e-15	0.0076	TRUE	63.1607
rs11029704	T	C	T	C	-0.0424	0.0699	0.097	0.4714	met-a-528	5.33e-06	0.0093	TRUE	20.7858
rs11045823	A	G	A	G	-0.1715	0.0728	0.1306	0.577301	met-a-528	9.91e-83	0.0089	TRUE	371.32
rs11581375	C	T	C	T	0.2174	-0.4968	0.2435	0.04132	met-a-528	7.48e-06	0.0485	TRUE	20.0926
rs12533589	T	C	T	C	0.0309	-0.1451	0.0937	0.1214	met-a-528	7.82e-06	0.0069	TRUE	20.0548
rs12565684	C	T	C	T	0.0311	0.1023	0.0826	0.2152	met-a-528	8.52e-06	0.007	TRUE	19.739
rs12820524	C	T	C	T	-0.1466	0.2983	0.3637	0.4121	met-a-528	3.97e-07	0.0289	TRUE	25.7319
rs16902795	C	G	C	G	0.0922	0.1516	0.1715	0.377	met-a-528	6.42e-06	0.0204	TRUE	20.4269
rs17617462	C	T	C	T	-0.0827	0.0675	0.1324	0.6102	met-a-528	2.01e-13	0.0112	TRUE	54.5224
rs1910202	G	A	G	A	0.1837	-0.313	0.3211	0.3298	met-a-528	3.41e-06	0.0396	TRUE	21.5193
rs3740065	G	A	G	A	-0.0552	0.029	0.1377	0.8334	met-a-528	5.77e-07	0.0111	TRUE	24.7305
rs4149021	A	G	A	G	0.2311	0.0502	0.1557	0.746899	met-a-528	3.05e-16	0.0283	TRUE	66.6848
rs4149056	C	T	C	T	0.2952	-0.1399	0.1014	0.1677	met-a-528	1e-200	0.0078	TRUE	1432.33
rs4721104	A	T	A	T	-0.0341	0.1564	0.0898	0.0816808	met-a-528	6.93e-06	0.0076	TRUE	20.1318
rs4762836	T	C	T	C	0.0584	-0.0989	0.1359	0.4668	met-a-528	1.01e-06	0.012	TRUE	23.6844
rs7138177	G	A	G	A	0.0784	-0.0702	0.1244	0.5726	met-a-528	3.11e-14	0.0103	TRUE	57.9372
rs7975166	A	G	A	G	-0.1407	0.124	0.2062	0.547599	met-a-528	1.45e-18	0.016	TRUE	77.33
rs10107576	C	G	C	G	0.046	0.0512	0.1103	0.6427	met-a-528	8.75e-06	0.0104	TRUE	19.5636
rs10505870	A	G	A	G	0.0654	-0.0769	0.1017	0.4492	met-a-528	3.13e-20	0.0071	TRUE	84.8475
rs10520327	G	A	G	A	0.032	-0.0894	0.0874	0.3064	met-a-528	3.27e-06	0.0069	TRUE	21.5081
rs10841797	A	G	A	G	-0.0604	0.074	0.0856	0.3874	met-a-528	2.44e-15	0.0076	TRUE	63.1607
rs11029704	T	C	T	C	-0.0424	0.0699	0.097	0.4714	met-a-528	5.33e-06	0.0093	TRUE	20.7858
rs11045823	A	G	A	G	-0.1715	0.0728	0.1306	0.577301	met-a-528	9.91e-83	0.0089	TRUE	371.32
rs11581375	C	T	C	T	0.2174	-0.4968	0.2435	0.04132	met-a-528	7.48e-06	0.0485	TRUE	20.0926
rs12533589	T	C	T	C	0.0309	-0.1451	0.0937	0.1214	met-a-528	7.82e-06	0.0069	TRUE	20.0548
rs12565684	C	T	C	T	0.0311	0.1023	0.0826	0.2152	met-a-528	8.52e-06	0.007	TRUE	19.739
rs12820524	C	T	C	T	-0.1466	0.2983	0.3637	0.4121	met-a-528	3.97e-07	0.0289	TRUE	25.7319
rs16902795	C	G	C	G	0.0922	0.1516	0.1715	0.377	met-a-528	6.42e-06	0.0204	TRUE	20.4269
rs17617462	C	T	C	T	-0.0827	0.0675	0.1324	0.6102	met-a-528	2.01e-13	0.0112	TRUE	54.5224
rs1910202	G	A	G	A	0.1837	-0.313	0.3211	0.3298	met-a-528	3.41e-06	0.0396	TRUE	21.5193
rs3740065	G	A	G	A	-0.0552	0.029	0.1377	0.8334	met-a-528	5.77e-07	0.0111	TRUE	24.7305
rs4149021	A	G	A	G	0.2311	0.0502	0.1557	0.746899	met-a-528	3.05e-16	0.0283	TRUE	66.6848
rs4149056	C	T	C	T	0.2952	-0.1399	0.1014	0.1677	met-a-528	1e-200	0.0078	TRUE	1432.33
rs4721104	A	T	A	T	-0.0341	0.1564	0.0898	0.0816808	met-a-528	6.93e-06	0.0076	TRUE	20.1318
rs4762836	T	C	T	C	0.0584	-0.0989	0.1359	0.4668	met-a-528	1.01e-06	0.012	TRUE	23.6844
rs7138177	G	A	G	A	0.0784	-0.0702	0.1244	0.5726	met-a-528	3.11e-14	0.0103	TRUE	57.9372
rs7975166	A	G	A	G	-0.1407	0.124	0.2062	0.547599	met-a-528	1.45e-18	0.016	TRUE	77.33
rs10107576	C	G	C	G	0.046	0.0512	0.1103	0.6427	met-a-528	8.75e-06	0.0104	TRUE	19.5636
rs10505870	A	G	A	G	0.0654	-0.0769	0.1017	0.4492	met-a-528	3.13e-20	0.0071	TRUE	84.8475
rs10520327	G	A	G	A	0.032	-0.0894	0.0874	0.3064	met-a-528	3.27e-06	0.0069	TRUE	21.5081
rs10841797	A	G	A	G	-0.0604	0.074	0.0856	0.3874	met-a-528	2.44e-15	0.0076	TRUE	63.1607
rs11029704	T	C	T	C	-0.0424	0.0699	0.097	0.4714	met-a-528	5.33e-06	0.0093	TRUE	20.7858
rs11045823	A	G	A	G	-0.1715	0.0728	0.1306	0.577301	met-a-528	9.91e-83	0.0089	TRUE	371.32
rs11581375	C	T	C	T	0.2174	-0.4968	0.2435	0.04132	met-a-528	7.48e-06	0.0485	TRUE	20.0926
rs12533589	T	C	T	C	0.0309	-0.1451	0.0937	0.1214	met-a-528	7.82e-06	0.0069	TRUE	20.0548
rs12565684	C	T	C	T	0.0311	0.1023	0.0826	0.2152	met-a-528	8.52e-06	0.007	TRUE	19.739
rs12820524	C	T	C	T	-0.1466	0.2983	0.3637	0.4121	met-a-528	3.97e-07	0.0289	TRUE	25.7319
rs16902795	C	G	C	G	0.0922	0.1516	0.1715	0.377	met-a-528	6.42e-06	0.0204	TRUE	20.4269
rs17617462	C	T	C	T	-0.0827	0.0675	0.1324	0.6102	met-a-528	2.01e-13	0.0112	TRUE	54.5224
rs1910202	G	A	G	A	0.1837	-0.313	0.3211	0.3298	met-a-528	3.41e-06	0.0396	TRUE	21.5193
rs3740065	G	A	G	A	-0.0552	0.029	0.1377	0.8334	met-a-528	5.77e-07	0.0111	TRUE	24.7305
rs4149021	A	G	A	G	0.2311	0.0502	0.1557	0.746899	met-a-528	3.05e-16	0.0283	TRUE	66.6848
rs4149056	C	T	C	T	0.2952	-0.1399	0.1014	0.1677	met-a-528	1e-200	0.0078	TRUE	1432.33
rs4721104	A	T	A	T	-0.0341	0.1564	0.0898	0.0816808	met-a-528	6.93e-06	0.0076	TRUE	20.1318
rs4762836	T	C	T	C	0.0584	-0.0989	0.1359	0.4668	met-a-528	1.01e-06	0.012	TRUE	23.6844
rs7138177	G	A	G	A	0.0784	-0.0702	0.1244	0.5726	met-a-528	3.11e-14	0.0103	TRUE	57.9372
rs7975166	A	G	A	G	-0.1407	0.124	0.2062	0.547599	met-a-528	1.45e-18	0.016	TRUE	77.33
rs10107576	C	G	C	G	0.046	0.0512	0.1103	0.6427	met-a-528	8.75e-06	0.0104	TRUE	19.5636
rs10505870	A	G	A	G	0.0654	-0.0769	0.1017	0.4492	met-a-528	3.13e-20	0.0071	TRUE	84.8475
rs10520327	G	A	G	A	0.032	-0.0894	0.0874	0.3064	met-a-528	3.27e-06	0.0069	TRUE	21.5081
rs10841797	A	G	A	G	-0.0604	0.074	0.0856	0.3874	met-a-528	2.44e-15	0.0076	TRUE	63.1607
rs11029704	T	C	T	C	-0.0424	0.0699	0.097	0.4714	met-a-528	5.33e-06	0.0093	TRUE	20.7858
rs11045823	A	G	A	G	-0.1715	0.0728	0.1306	0.577301	met-a-528	9.91e-83	0.0089	TRUE	371.32
rs11581375	C	T	C	T	0.2174	-0.4968	0.2435	0.04132	met-a-528	7.48e-06	0.0485	TRUE	20.0926
rs12533589	T	C	T	C	0.0309	-0.1451	0.0937	0.1214	met-a-528	7.82e-06	0.0069	TRUE	20.0548
rs12565684	C	T	C	T	0.0311	0.1023	0.0826	0.2152	met-a-528	8.52e-06	0.007	TRUE	19.739
rs12820524	C	T	C	T	-0.1466	0.2983	0.3637	0.4121	met-a-528	3.97e-07	0.0289	TRUE	25.7319
rs16902795	C	G	C	G	0.0922	0.1516	0.1715	0.377	met-a-528	6.42e-06	0.0204	TRUE	20.4269
rs17617462	C	T	C	T	-0.0827	0.0675	0.1324	0.6102	met-a-528	2.01e-13	0.0112	TRUE	54.5224
rs1910202	G	A	G	A	0.1837	-0.313	0.3211	0.3298	met-a-528	3.41e-06	0.0396	TRUE	21.5193
rs3740065	G	A	G	A	-0.0552	0.029	0.1377	0.8334	met-a-528	5.77e-07	0.0111	TRUE	24.7305
rs4149021	A	G	A	G	0.2311	0.0502	0.1557	0.746899	met-a-528	3.05e-16	0.0283	TRUE	66.6848
rs4149056	C	T	C	T	0.2952	-0.1399	0.1014	0.1677	met-a-528	1e-200	0.0078	TRUE	1432.33
rs4721104	A	T	A	T	-0.0341	0.1564	0.0898	0.0816808	met-a-528	6.93e-06	0.0076	TRUE	20.1318
rs4762836	T	C	T	C	0.0584	-0.0989	0.1359	0.4668	met-a-528	1.01e-06	0.012	TRUE	23.6844
rs7138177	G	A	G	A	0.0784	-0.0702	0.1244	0.5726	met-a-528	3.11e-14	0.0103	TRUE	57.9372
rs7975166	A	G	A	G	-0.1407	0.124	0.2062	0.547599	met-a-528	1.45e-18	0.016	TRUE	77.33
rs10107576	C	G	C	G	0.046	0.0512	0.1103	0.6427	met-a-528	8.75e-06	0.0104	TRUE	19.5636
rs10505870	A	G	A	G	0.0654	-0.0769	0.1017	0.4492	met-a-528	3.13e-20	0.0071	TRUE	84.8475
rs10520327	G	A	G	A	0.032	-0.0894	0.0874	0.3064	met-a-528	3.27e-06	0.0069	TRUE	21.5081
rs10841797	A	G	A	G	-0.0604	0.074	0.0856	0.3874	met-a-528	2.44e-15	0.0076	TRUE	63.1607
rs11029704	T	C	T	C	-0.0424	0.0699	0.097	0.4714	met-a-528	5.33e-06	0.0093	TRUE	20.7858
rs11045823	A	G	A	G	-0.1715	0.0728	0.1306	0.577301	met-a-528	9.91e-83	0.0089	TRUE	371.32
rs11581375	C	T	C	T	0.2174	-0.4968	0.2435	0.04132	met-a-528	7.48e-06	0.0485	TRUE	20.0926
rs12533589	T	C	T	C	0.0309	-0.1451	0.0937	0.1214	met-a-528	7.82e-06	0.0069	TRUE	20.0548
rs12565684	C	T	C	T	0.0311	0.1023	0.0826	0.2152	met-a-528	8.52e-06	0.007	TRUE	19.739
rs12820524	C	T	C	T	-0.1466	0.2983	0.3637	0.4121	met-a-528	3.97e-07	0.0289	TRUE	25.7319
rs16902795	C	G	C	G	0.0922	0.1516	0.1715	0.377	met-a-528	6.42e-06	0.0204	TRUE	20.4269
rs17617462	C	T	C	T	-0.0827	0.0675	0.1324	0.6102	met-a-528	2.01e-13	0.0112	TRUE	54.5224
rs1910202	G	A	G	A	0.1837	-0.313	0.3211	0.3298	met-a-528	3.41e-06	0.0396	TRUE	21.5193
rs3740065	G	A	G	A	-0.0552	0.029	0.1377	0.8334	met-a-528	5.77e-07	0.0111	TRUE	24.7305
rs4149021	A	G	A	G	0.2311	0.0502	0.1557	0.746899	met-a-528	3.05e-16	0.0283	TRUE	66.6848
rs4149056	C	T	C	T	0.2952	-0.1399	0.1014	0.1677	met-a-528	1e-200	0.0078	TRUE	1432.33
rs4721104	A	T	A	T	-0.0341	0.1564	0.0898	0.0816808	met-a-528	6.93e-06	0.0076	TRUE	20.1318
rs4762836	T	C	T	C	0.0584	-0.0989	0.1359	0.4668	met-a-528	1.01e-06	0.012	TRUE	23.6844
rs7138177	G	A	G	A	0.0784	-0.0702	0.1244	0.5726	met-a-528	3.11e-14	0.0103	TRUE	57.9372
rs7975166	A	G	A	G	-0.1407	0.124	0.2062	0.547599	met-a-528	1.45e-18	0.016	TRUE	77.33
rs10505870	A	G	A	G	0.0298	-0.0769	0.1017	0.4492	met-a-531	9.16e-12	0.0044	TRUE	45.8698
rs10516440	G	A	G	A	-0.0281	-0.049	0.1151	0.67	met-a-531	2.13e-06	0.0059	TRUE	22.6834
rs11045824	T	G	T	G	-0.0953	0.0745	0.1306	0.5684	met-a-531	4.34e-79	0.0051	TRUE	349.177
rs11231630	T	C	T	C	0.0443	0.107	0.2345	0.6482	met-a-531	7.48e-06	0.0099	TRUE	20.0234
rs11982	A	G	A	G	0.0385	0.1448	0.1496	0.3332	met-a-531	2.26e-06	0.0081	TRUE	22.5918
rs12228798	T	C	T	C	-0.0349	0.0257	0.0936	0.7837	met-a-531	6.19e-16	0.0043	TRUE	65.874
rs12484077	A	T	A	T	-0.0285	0.1551	0.1242	0.2117	met-a-531	9.09e-06	0.0064	TRUE	19.8303
rs12810446	T	C	T	C	-0.0308	0.0727	0.0855	0.3954	met-a-531	4.38e-13	0.0042	TRUE	53.7778
rs12820524	C	T	C	T	-0.1083	0.2983	0.3637	0.4121	met-a-531	1.19e-10	0.0168	TRUE	41.5564
rs16869851	C	A	C	A	-0.0256	0.0476	0.1372	0.7286	met-a-531	8.89e-06	0.0058	TRUE	19.4816
rs16923154	G	A	G	A	0.0493	-0.0871	0.1145	0.4464	met-a-531	5.57e-08	0.0091	TRUE	29.3502
rs1871395	G	A	G	A	0.1101	-0.1581	0.0907	0.0812999	met-a-531	1.06e-89	0.0055	TRUE	400.728
rs1899256	G	C	G	C	-0.0377	0.0266	0.1231	0.8292	met-a-531	2.61e-07	0.0073	TRUE	26.6709
rs2016052	G	C	G	C	-0.0194	-0.1701	0.0814	0.0366201	met-a-531	2.92e-06	0.0042	FALSE	21.3356
rs2108622	T	C	T	C	-0.0248	0.1097	0.1027	0.2854	met-a-531	8.49e-09	0.0043	TRUE	33.2634
rs2226274	C	T	C	T	0.0403	-0.0329	0.1681	0.8448	met-a-531	3.33e-06	0.0087	TRUE	21.4571
rs3857224	T	C	T	C	0.0188	-0.0031	0.0898	0.9724	met-a-531	6.31e-06	0.0042	TRUE	20.0363
rs4149021	A	G	A	G	0.082	0.0502	0.1557	0.746899	met-a-531	6.47e-06	0.0182	TRUE	20.2995
rs4762818	A	G	A	G	0.0267	0.1486	0.1315	0.2583	met-a-531	5.45e-06	0.0059	TRUE	20.4795
rs7687485	A	T	A	T	-0.0324	-0.031	0.1168	0.7905	met-a-531	8.28e-07	0.0066	TRUE	24.0992
rs7975166	A	G	A	G	-0.0618	0.124	0.2062	0.547599	met-a-531	2.08e-11	0.0092	TRUE	45.1233
rs910923	G	A	G	A	-0.019	0.0372	0.0849	0.6612	met-a-531	3.9e-06	0.0041	TRUE	21.4753
rs10505870	A	G	A	G	0.0298	-0.0769	0.1017	0.4492	met-a-531	9.16e-12	0.0044	TRUE	45.8698
rs10516440	G	A	G	A	-0.0281	-0.049	0.1151	0.67	met-a-531	2.13e-06	0.0059	TRUE	22.6834
rs11045824	T	G	T	G	-0.0953	0.0745	0.1306	0.5684	met-a-531	4.34e-79	0.0051	TRUE	349.177
rs11231630	T	C	T	C	0.0443	0.107	0.2345	0.6482	met-a-531	7.48e-06	0.0099	TRUE	20.0234
rs11982	A	G	A	G	0.0385	0.1448	0.1496	0.3332	met-a-531	2.26e-06	0.0081	TRUE	22.5918
rs12228798	T	C	T	C	-0.0349	0.0257	0.0936	0.7837	met-a-531	6.19e-16	0.0043	TRUE	65.874
rs12484077	A	T	A	T	-0.0285	0.1551	0.1242	0.2117	met-a-531	9.09e-06	0.0064	TRUE	19.8303
rs12810446	T	C	T	C	-0.0308	0.0727	0.0855	0.3954	met-a-531	4.38e-13	0.0042	TRUE	53.7778
rs12820524	C	T	C	T	-0.1083	0.2983	0.3637	0.4121	met-a-531	1.19e-10	0.0168	TRUE	41.5564
rs16869851	C	A	C	A	-0.0256	0.0476	0.1372	0.7286	met-a-531	8.89e-06	0.0058	TRUE	19.4816
rs16923154	G	A	G	A	0.0493	-0.0871	0.1145	0.4464	met-a-531	5.57e-08	0.0091	TRUE	29.3502
rs1871395	G	A	G	A	0.1101	-0.1581	0.0907	0.0812999	met-a-531	1.06e-89	0.0055	TRUE	400.728
rs1899256	G	C	G	C	-0.0377	0.0266	0.1231	0.8292	met-a-531	2.61e-07	0.0073	TRUE	26.6709
rs2016052	G	C	G	C	-0.0194	-0.1701	0.0814	0.0366201	met-a-531	2.92e-06	0.0042	FALSE	21.3356
rs2108622	T	C	T	C	-0.0248	0.1097	0.1027	0.2854	met-a-531	8.49e-09	0.0043	TRUE	33.2634
rs2226274	C	T	C	T	0.0403	-0.0329	0.1681	0.8448	met-a-531	3.33e-06	0.0087	TRUE	21.4571
rs3857224	T	C	T	C	0.0188	-0.0031	0.0898	0.9724	met-a-531	6.31e-06	0.0042	TRUE	20.0363
rs4149021	A	G	A	G	0.082	0.0502	0.1557	0.746899	met-a-531	6.47e-06	0.0182	TRUE	20.2995
rs4762818	A	G	A	G	0.0267	0.1486	0.1315	0.2583	met-a-531	5.45e-06	0.0059	TRUE	20.4795
rs7687485	A	T	A	T	-0.0324	-0.031	0.1168	0.7905	met-a-531	8.28e-07	0.0066	TRUE	24.0992
rs7975166	A	G	A	G	-0.0618	0.124	0.2062	0.547599	met-a-531	2.08e-11	0.0092	TRUE	45.1233
rs910923	G	A	G	A	-0.019	0.0372	0.0849	0.6612	met-a-531	3.9e-06	0.0041	TRUE	21.4753
rs10505870	A	G	A	G	0.0298	-0.0769	0.1017	0.4492	met-a-531	9.16e-12	0.0044	TRUE	45.8698
rs10516440	G	A	G	A	-0.0281	-0.049	0.1151	0.67	met-a-531	2.13e-06	0.0059	TRUE	22.6834
rs11045824	T	G	T	G	-0.0953	0.0745	0.1306	0.5684	met-a-531	4.34e-79	0.0051	TRUE	349.177
rs11231630	T	C	T	C	0.0443	0.107	0.2345	0.6482	met-a-531	7.48e-06	0.0099	TRUE	20.0234
rs11982	A	G	A	G	0.0385	0.1448	0.1496	0.3332	met-a-531	2.26e-06	0.0081	TRUE	22.5918
rs12228798	T	C	T	C	-0.0349	0.0257	0.0936	0.7837	met-a-531	6.19e-16	0.0043	TRUE	65.874
rs12484077	A	T	A	T	-0.0285	0.1551	0.1242	0.2117	met-a-531	9.09e-06	0.0064	TRUE	19.8303
rs12810446	T	C	T	C	-0.0308	0.0727	0.0855	0.3954	met-a-531	4.38e-13	0.0042	TRUE	53.7778
rs12820524	C	T	C	T	-0.1083	0.2983	0.3637	0.4121	met-a-531	1.19e-10	0.0168	TRUE	41.5564
rs16869851	C	A	C	A	-0.0256	0.0476	0.1372	0.7286	met-a-531	8.89e-06	0.0058	TRUE	19.4816
rs16923154	G	A	G	A	0.0493	-0.0871	0.1145	0.4464	met-a-531	5.57e-08	0.0091	TRUE	29.3502
rs1871395	G	A	G	A	0.1101	-0.1581	0.0907	0.0812999	met-a-531	1.06e-89	0.0055	TRUE	400.728
rs1899256	G	C	G	C	-0.0377	0.0266	0.1231	0.8292	met-a-531	2.61e-07	0.0073	TRUE	26.6709
rs2016052	G	C	G	C	-0.0194	-0.1701	0.0814	0.0366201	met-a-531	2.92e-06	0.0042	FALSE	21.3356
rs2108622	T	C	T	C	-0.0248	0.1097	0.1027	0.2854	met-a-531	8.49e-09	0.0043	TRUE	33.2634
rs2226274	C	T	C	T	0.0403	-0.0329	0.1681	0.8448	met-a-531	3.33e-06	0.0087	TRUE	21.4571
rs3857224	T	C	T	C	0.0188	-0.0031	0.0898	0.9724	met-a-531	6.31e-06	0.0042	TRUE	20.0363
rs4149021	A	G	A	G	0.082	0.0502	0.1557	0.746899	met-a-531	6.47e-06	0.0182	TRUE	20.2995
rs4762818	A	G	A	G	0.0267	0.1486	0.1315	0.2583	met-a-531	5.45e-06	0.0059	TRUE	20.4795
rs7687485	A	T	A	T	-0.0324	-0.031	0.1168	0.7905	met-a-531	8.28e-07	0.0066	TRUE	24.0992
rs7975166	A	G	A	G	-0.0618	0.124	0.2062	0.547599	met-a-531	2.08e-11	0.0092	TRUE	45.1233
rs910923	G	A	G	A	-0.019	0.0372	0.0849	0.6612	met-a-531	3.9e-06	0.0041	TRUE	21.4753
rs10505870	A	G	A	G	0.0298	-0.0769	0.1017	0.4492	met-a-531	9.16e-12	0.0044	TRUE	45.8698
rs10516440	G	A	G	A	-0.0281	-0.049	0.1151	0.67	met-a-531	2.13e-06	0.0059	TRUE	22.6834
rs11045824	T	G	T	G	-0.0953	0.0745	0.1306	0.5684	met-a-531	4.34e-79	0.0051	TRUE	349.177
rs11231630	T	C	T	C	0.0443	0.107	0.2345	0.6482	met-a-531	7.48e-06	0.0099	TRUE	20.0234
rs11982	A	G	A	G	0.0385	0.1448	0.1496	0.3332	met-a-531	2.26e-06	0.0081	TRUE	22.5918
rs12228798	T	C	T	C	-0.0349	0.0257	0.0936	0.7837	met-a-531	6.19e-16	0.0043	TRUE	65.874
rs12484077	A	T	A	T	-0.0285	0.1551	0.1242	0.2117	met-a-531	9.09e-06	0.0064	TRUE	19.8303
rs12810446	T	C	T	C	-0.0308	0.0727	0.0855	0.3954	met-a-531	4.38e-13	0.0042	TRUE	53.7778
rs12820524	C	T	C	T	-0.1083	0.2983	0.3637	0.4121	met-a-531	1.19e-10	0.0168	TRUE	41.5564
rs16869851	C	A	C	A	-0.0256	0.0476	0.1372	0.7286	met-a-531	8.89e-06	0.0058	TRUE	19.4816
rs16923154	G	A	G	A	0.0493	-0.0871	0.1145	0.4464	met-a-531	5.57e-08	0.0091	TRUE	29.3502
rs1871395	G	A	G	A	0.1101	-0.1581	0.0907	0.0812999	met-a-531	1.06e-89	0.0055	TRUE	400.728
rs1899256	G	C	G	C	-0.0377	0.0266	0.1231	0.8292	met-a-531	2.61e-07	0.0073	TRUE	26.6709
rs2016052	G	C	G	C	-0.0194	-0.1701	0.0814	0.0366201	met-a-531	2.92e-06	0.0042	FALSE	21.3356
rs2108622	T	C	T	C	-0.0248	0.1097	0.1027	0.2854	met-a-531	8.49e-09	0.0043	TRUE	33.2634
rs2226274	C	T	C	T	0.0403	-0.0329	0.1681	0.8448	met-a-531	3.33e-06	0.0087	TRUE	21.4571
rs3857224	T	C	T	C	0.0188	-0.0031	0.0898	0.9724	met-a-531	6.31e-06	0.0042	TRUE	20.0363
rs4149021	A	G	A	G	0.082	0.0502	0.1557	0.746899	met-a-531	6.47e-06	0.0182	TRUE	20.2995
rs4762818	A	G	A	G	0.0267	0.1486	0.1315	0.2583	met-a-531	5.45e-06	0.0059	TRUE	20.4795
rs7687485	A	T	A	T	-0.0324	-0.031	0.1168	0.7905	met-a-531	8.28e-07	0.0066	TRUE	24.0992
rs7975166	A	G	A	G	-0.0618	0.124	0.2062	0.547599	met-a-531	2.08e-11	0.0092	TRUE	45.1233
rs910923	G	A	G	A	-0.019	0.0372	0.0849	0.6612	met-a-531	3.9e-06	0.0041	TRUE	21.4753
rs10505870	A	G	A	G	0.0298	-0.0769	0.1017	0.4492	met-a-531	9.16e-12	0.0044	TRUE	45.8698
rs10516440	G	A	G	A	-0.0281	-0.049	0.1151	0.67	met-a-531	2.13e-06	0.0059	TRUE	22.6834
rs11045824	T	G	T	G	-0.0953	0.0745	0.1306	0.5684	met-a-531	4.34e-79	0.0051	TRUE	349.177
rs11231630	T	C	T	C	0.0443	0.107	0.2345	0.6482	met-a-531	7.48e-06	0.0099	TRUE	20.0234
rs11982	A	G	A	G	0.0385	0.1448	0.1496	0.3332	met-a-531	2.26e-06	0.0081	TRUE	22.5918
rs12228798	T	C	T	C	-0.0349	0.0257	0.0936	0.7837	met-a-531	6.19e-16	0.0043	TRUE	65.874
rs12484077	A	T	A	T	-0.0285	0.1551	0.1242	0.2117	met-a-531	9.09e-06	0.0064	TRUE	19.8303
rs12810446	T	C	T	C	-0.0308	0.0727	0.0855	0.3954	met-a-531	4.38e-13	0.0042	TRUE	53.7778
rs12820524	C	T	C	T	-0.1083	0.2983	0.3637	0.4121	met-a-531	1.19e-10	0.0168	TRUE	41.5564
rs16869851	C	A	C	A	-0.0256	0.0476	0.1372	0.7286	met-a-531	8.89e-06	0.0058	TRUE	19.4816
rs16923154	G	A	G	A	0.0493	-0.0871	0.1145	0.4464	met-a-531	5.57e-08	0.0091	TRUE	29.3502
rs1871395	G	A	G	A	0.1101	-0.1581	0.0907	0.0812999	met-a-531	1.06e-89	0.0055	TRUE	400.728
rs1899256	G	C	G	C	-0.0377	0.0266	0.1231	0.8292	met-a-531	2.61e-07	0.0073	TRUE	26.6709
rs2016052	G	C	G	C	-0.0194	-0.1701	0.0814	0.0366201	met-a-531	2.92e-06	0.0042	FALSE	21.3356
rs2108622	T	C	T	C	-0.0248	0.1097	0.1027	0.2854	met-a-531	8.49e-09	0.0043	TRUE	33.2634
rs2226274	C	T	C	T	0.0403	-0.0329	0.1681	0.8448	met-a-531	3.33e-06	0.0087	TRUE	21.4571
rs3857224	T	C	T	C	0.0188	-0.0031	0.0898	0.9724	met-a-531	6.31e-06	0.0042	TRUE	20.0363
rs4149021	A	G	A	G	0.082	0.0502	0.1557	0.746899	met-a-531	6.47e-06	0.0182	TRUE	20.2995
rs4762818	A	G	A	G	0.0267	0.1486	0.1315	0.2583	met-a-531	5.45e-06	0.0059	TRUE	20.4795
rs7687485	A	T	A	T	-0.0324	-0.031	0.1168	0.7905	met-a-531	8.28e-07	0.0066	TRUE	24.0992
rs7975166	A	G	A	G	-0.0618	0.124	0.2062	0.547599	met-a-531	2.08e-11	0.0092	TRUE	45.1233
rs910923	G	A	G	A	-0.019	0.0372	0.0849	0.6612	met-a-531	3.9e-06	0.0041	TRUE	21.4753
rs10859956	C	T	C	T	0.0522	0.1667	0.0839	0.04705	met-a-533	8e-06	0.0117	TRUE	19.9053
rs11177672	T	C	T	C	0.0743	-0.0214	0.112	0.8484	met-a-533	7.01e-06	0.0165	TRUE	20.2773
rs12479945	G	T	G	T	0.0918	0.2725	0.1254	0.0297201	met-a-533	3.39e-06	0.0197	TRUE	21.7147
rs12893753	C	T	C	T	-0.1566	-0.2161	0.1471	0.1419	met-a-533	1.26e-07	0.0296	TRUE	27.9898
rs17483163	G	A	G	A	0.0544	0.07	0.0871	0.4216	met-a-533	6.58e-07	0.0109	TRUE	24.9083
rs17700286	G	C	G	C	-0.0617	0.0055	0.0912	0.9516	met-a-533	1.77e-06	0.0129	TRUE	22.8766
rs2022010	G	T	G	T	0.1119	0.0326	0.1763	0.8531	met-a-533	9.01e-06	0.0252	TRUE	19.7178
rs213190	G	T	G	T	-0.0529	-0.0644	0.0828	0.4365	met-a-533	2.36e-06	0.0112	TRUE	22.3088
rs2714775	C	T	C	T	0.1526	-0.0029	0.2011	0.9885	met-a-533	1.52e-06	0.0317	TRUE	23.1734
rs7539884	C	T	C	T	-0.0623	0.1017	0.1027	0.3218	met-a-533	2.67e-06	0.0133	TRUE	21.9418
rs7856961	A	G	A	G	-0.0778	-0.2379	0.1142	0.0372203	met-a-533	2.15e-06	0.0164	TRUE	22.5046
rs7961980	G	C	G	C	0.0493	0.2066	0.0842	0.01417	met-a-533	6.83e-06	0.011	TRUE	20.0867
rs982503	C	T	C	T	-0.0667	0.0167	0.097	0.8631	met-a-533	2.21e-06	0.0141	TRUE	22.3776
rs10859956	C	T	C	T	0.0522	0.1667	0.0839	0.04705	met-a-533	8e-06	0.0117	TRUE	19.9053
rs11177672	T	C	T	C	0.0743	-0.0214	0.112	0.8484	met-a-533	7.01e-06	0.0165	TRUE	20.2773
rs12479945	G	T	G	T	0.0918	0.2725	0.1254	0.0297201	met-a-533	3.39e-06	0.0197	TRUE	21.7147
rs12893753	C	T	C	T	-0.1566	-0.2161	0.1471	0.1419	met-a-533	1.26e-07	0.0296	TRUE	27.9898
rs17483163	G	A	G	A	0.0544	0.07	0.0871	0.4216	met-a-533	6.58e-07	0.0109	TRUE	24.9083
rs17700286	G	C	G	C	-0.0617	0.0055	0.0912	0.9516	met-a-533	1.77e-06	0.0129	TRUE	22.8766
rs2022010	G	T	G	T	0.1119	0.0326	0.1763	0.8531	met-a-533	9.01e-06	0.0252	TRUE	19.7178
rs213190	G	T	G	T	-0.0529	-0.0644	0.0828	0.4365	met-a-533	2.36e-06	0.0112	TRUE	22.3088
rs2714775	C	T	C	T	0.1526	-0.0029	0.2011	0.9885	met-a-533	1.52e-06	0.0317	TRUE	23.1734
rs7539884	C	T	C	T	-0.0623	0.1017	0.1027	0.3218	met-a-533	2.67e-06	0.0133	TRUE	21.9418
rs7856961	A	G	A	G	-0.0778	-0.2379	0.1142	0.0372203	met-a-533	2.15e-06	0.0164	TRUE	22.5046
rs7961980	G	C	G	C	0.0493	0.2066	0.0842	0.01417	met-a-533	6.83e-06	0.011	TRUE	20.0867
rs982503	C	T	C	T	-0.0667	0.0167	0.097	0.8631	met-a-533	2.21e-06	0.0141	TRUE	22.3776
rs10859956	C	T	C	T	0.0522	0.1667	0.0839	0.04705	met-a-533	8e-06	0.0117	TRUE	19.9053
rs11177672	T	C	T	C	0.0743	-0.0214	0.112	0.8484	met-a-533	7.01e-06	0.0165	TRUE	20.2773
rs12479945	G	T	G	T	0.0918	0.2725	0.1254	0.0297201	met-a-533	3.39e-06	0.0197	TRUE	21.7147
rs12893753	C	T	C	T	-0.1566	-0.2161	0.1471	0.1419	met-a-533	1.26e-07	0.0296	TRUE	27.9898
rs17483163	G	A	G	A	0.0544	0.07	0.0871	0.4216	met-a-533	6.58e-07	0.0109	TRUE	24.9083
rs17700286	G	C	G	C	-0.0617	0.0055	0.0912	0.9516	met-a-533	1.77e-06	0.0129	TRUE	22.8766
rs2022010	G	T	G	T	0.1119	0.0326	0.1763	0.8531	met-a-533	9.01e-06	0.0252	TRUE	19.7178
rs213190	G	T	G	T	-0.0529	-0.0644	0.0828	0.4365	met-a-533	2.36e-06	0.0112	TRUE	22.3088
rs2714775	C	T	C	T	0.1526	-0.0029	0.2011	0.9885	met-a-533	1.52e-06	0.0317	TRUE	23.1734
rs7539884	C	T	C	T	-0.0623	0.1017	0.1027	0.3218	met-a-533	2.67e-06	0.0133	TRUE	21.9418
rs7856961	A	G	A	G	-0.0778	-0.2379	0.1142	0.0372203	met-a-533	2.15e-06	0.0164	TRUE	22.5046
rs7961980	G	C	G	C	0.0493	0.2066	0.0842	0.01417	met-a-533	6.83e-06	0.011	TRUE	20.0867
rs982503	C	T	C	T	-0.0667	0.0167	0.097	0.8631	met-a-533	2.21e-06	0.0141	TRUE	22.3776
rs10859956	C	T	C	T	0.0522	0.1667	0.0839	0.04705	met-a-533	8e-06	0.0117	TRUE	19.9053
rs11177672	T	C	T	C	0.0743	-0.0214	0.112	0.8484	met-a-533	7.01e-06	0.0165	TRUE	20.2773
rs12479945	G	T	G	T	0.0918	0.2725	0.1254	0.0297201	met-a-533	3.39e-06	0.0197	TRUE	21.7147
rs12893753	C	T	C	T	-0.1566	-0.2161	0.1471	0.1419	met-a-533	1.26e-07	0.0296	TRUE	27.9898
rs17483163	G	A	G	A	0.0544	0.07	0.0871	0.4216	met-a-533	6.58e-07	0.0109	TRUE	24.9083
rs17700286	G	C	G	C	-0.0617	0.0055	0.0912	0.9516	met-a-533	1.77e-06	0.0129	TRUE	22.8766
rs2022010	G	T	G	T	0.1119	0.0326	0.1763	0.8531	met-a-533	9.01e-06	0.0252	TRUE	19.7178
rs213190	G	T	G	T	-0.0529	-0.0644	0.0828	0.4365	met-a-533	2.36e-06	0.0112	TRUE	22.3088
rs2714775	C	T	C	T	0.1526	-0.0029	0.2011	0.9885	met-a-533	1.52e-06	0.0317	TRUE	23.1734
rs7539884	C	T	C	T	-0.0623	0.1017	0.1027	0.3218	met-a-533	2.67e-06	0.0133	TRUE	21.9418
rs7856961	A	G	A	G	-0.0778	-0.2379	0.1142	0.0372203	met-a-533	2.15e-06	0.0164	TRUE	22.5046
rs7961980	G	C	G	C	0.0493	0.2066	0.0842	0.01417	met-a-533	6.83e-06	0.011	TRUE	20.0867
rs982503	C	T	C	T	-0.0667	0.0167	0.097	0.8631	met-a-533	2.21e-06	0.0141	TRUE	22.3776
rs10859956	C	T	C	T	0.0522	0.1667	0.0839	0.04705	met-a-533	8e-06	0.0117	TRUE	19.9053
rs11177672	T	C	T	C	0.0743	-0.0214	0.112	0.8484	met-a-533	7.01e-06	0.0165	TRUE	20.2773
rs12479945	G	T	G	T	0.0918	0.2725	0.1254	0.0297201	met-a-533	3.39e-06	0.0197	TRUE	21.7147
rs12893753	C	T	C	T	-0.1566	-0.2161	0.1471	0.1419	met-a-533	1.26e-07	0.0296	TRUE	27.9898
rs17483163	G	A	G	A	0.0544	0.07	0.0871	0.4216	met-a-533	6.58e-07	0.0109	TRUE	24.9083
rs17700286	G	C	G	C	-0.0617	0.0055	0.0912	0.9516	met-a-533	1.77e-06	0.0129	TRUE	22.8766
rs2022010	G	T	G	T	0.1119	0.0326	0.1763	0.8531	met-a-533	9.01e-06	0.0252	TRUE	19.7178
rs213190	G	T	G	T	-0.0529	-0.0644	0.0828	0.4365	met-a-533	2.36e-06	0.0112	TRUE	22.3088
rs2714775	C	T	C	T	0.1526	-0.0029	0.2011	0.9885	met-a-533	1.52e-06	0.0317	TRUE	23.1734
rs7539884	C	T	C	T	-0.0623	0.1017	0.1027	0.3218	met-a-533	2.67e-06	0.0133	TRUE	21.9418
rs7856961	A	G	A	G	-0.0778	-0.2379	0.1142	0.0372203	met-a-533	2.15e-06	0.0164	TRUE	22.5046
rs7961980	G	C	G	C	0.0493	0.2066	0.0842	0.01417	met-a-533	6.83e-06	0.011	TRUE	20.0867
rs982503	C	T	C	T	-0.0667	0.0167	0.097	0.8631	met-a-533	2.21e-06	0.0141	TRUE	22.3776
rs10412803	T	C	T	C	0.0097	0.002	0.0978	0.9835	met-a-536	4.42e-08	0.0018	TRUE	29.0401
rs11089325	T	C	T	C	0.0227	-0.2085	0.1857	0.2614	met-a-536	1.19e-08	0.004	TRUE	32.2056
rs11485264	G	A	G	A	0.0119	-0.0606	0.0996	0.5425	met-a-536	6.74e-06	0.0026	TRUE	20.9482
rs11541479	A	G	A	G	-0.014	-0.106	0.1205	0.3794	met-a-536	3.06e-06	0.003	TRUE	21.7778
rs11949401	C	T	C	T	0.0079	0.004	0.0869	0.963	met-a-536	6.79e-06	0.0017	TRUE	21.5952
rs12471416	G	A	G	A	0.008	-0.0761	0.0907	0.4016	met-a-536	4.56e-06	0.0017	TRUE	22.1453
rs1424092	T	G	T	G	-0.0092	-0.0494	0.0821	0.547599	met-a-536	1.78e-07	0.0018	TRUE	26.1235
rs1540603	A	C	A	C	-0.0676	-0.1033	0.5583	0.8533	met-a-536	7e-06	0.015	TRUE	20.31
rs1548357	C	T	C	T	0.0106	-0.1025	0.0857	0.2319	met-a-536	4.93e-09	0.0018	TRUE	34.679
rs1566481	G	A	G	A	-0.0083	-0.0417	0.0905	0.6447	met-a-536	7.7e-06	0.0019	TRUE	19.0831
rs16844839	T	C	T	C	-0.0113	-0.0137	0.0892	0.8778	met-a-536	5e-06	0.0025	TRUE	20.4304
rs16982844	A	C	A	C	-0.0423	0.2589	0.1895	0.172	met-a-536	9.08e-10	0.0069	TRUE	37.5822
rs175197	T	C	T	C	-0.0137	0.0889	0.0819	0.278	met-a-536	2.1e-15	0.0017	TRUE	64.9446
rs1919817	C	T	C	T	0.0241	0.0179	0.1457	0.9024	met-a-536	7.02e-06	0.0054	TRUE	19.918
rs2009217	C	T	C	T	0.0081	-0.1195	0.0992	0.2281	met-a-536	4.91e-06	0.0018	TRUE	20.25
rs2188839	G	A	G	A	-0.0115	0.1879	0.1144	0.1007	met-a-536	7.47e-06	0.0026	TRUE	19.5636
rs2205212	G	A	G	A	-0.0078	-0.0757	0.0852	0.3741	met-a-536	9.37e-06	0.0018	TRUE	18.7778
rs2239393	G	A	G	A	0.0334	-0.2203	0.0872	0.0115199	met-a-536	4.6e-83	0.0017	TRUE	386.007
rs2295465	C	A	C	A	0.0118	0.0528	0.1379	0.701699	met-a-536	6.65e-06	0.0026	TRUE	20.5976
rs2382376	T	C	T	C	0.0081	-0.0606	0.0945	0.5215	met-a-536	6.5e-06	0.0018	TRUE	20.25
rs282145	C	T	C	T	-0.0087	0.05	0.0866	0.5636	met-a-536	7.18e-07	0.0018	TRUE	23.3611
rs2871047	A	G	A	G	0.0429	0.2323	0.1321	0.0785597	met-a-536	3.8e-22	0.0044	TRUE	95.0625
rs3804043	A	C	A	C	0.0178	-0.0173	0.0925	0.8515	met-a-536	7.76e-24	0.0018	TRUE	97.7901
rs3856584	T	C	T	C	0.0078	-0.1557	0.0851	0.0673798	met-a-536	6.62e-06	0.0017	TRUE	21.0519
rs3887893	C	T	C	T	-0.009	-0.1451	0.0839	0.0837896	met-a-536	6.8e-06	0.002	TRUE	20.25
rs417309	A	G	A	G	-0.0167	0.1604	0.1258	0.2024	met-a-536	9.11e-07	0.0034	TRUE	24.1254
rs4846728	T	C	T	C	-0.0079	0.0731	0.0886	0.4098	met-a-536	8.14e-06	0.0018	TRUE	19.2623
rs549114	A	G	A	G	0.0086	0.1106	0.0847	0.1918	met-a-536	7.57e-07	0.0017	TRUE	25.5917
rs5993891	T	C	T	C	0.0337	0.106	0.2335	0.649901	met-a-536	8.45e-15	0.0043	TRUE	61.4218
rs6824211	A	G	A	G	-0.0091	-0.0071	0.0843	0.9328	met-a-536	2.16e-07	0.0017	TRUE	28.654
rs7255053	C	A	C	A	-0.0078	-0.0069	0.0901	0.939	met-a-536	6.36e-06	0.0017	TRUE	21.0519
rs7290062	C	T	C	T	0.0168	-0.1454	0.1415	0.3043	met-a-536	2.24e-11	0.0025	TRUE	45.1584
rs7707010	G	A	G	A	-0.0252	0.252	0.2048	0.2186	met-a-536	9.61e-09	0.0044	TRUE	32.8017
rs7748892	G	A	G	A	-0.0287	0.5583	0.2533	0.0274998	met-a-536	4.29e-07	0.0057	TRUE	25.3521
rs8038921	A	C	A	C	0.0117	-0.0477	0.1265	0.7063	met-a-536	4.67e-06	0.0025	TRUE	21.9024
rs866142	G	A	G	A	-0.008	0.108	0.0858	0.2083	met-a-536	3.79e-06	0.0017	TRUE	22.1453
rs9318225	C	T	C	T	0.0106	0.0394	0.0841	0.6399	met-a-536	1.95e-09	0.0018	TRUE	34.679
rs9558480	G	A	G	A	0.0165	-0.0107	0.0923	0.9077	met-a-536	7.84e-06	0.0037	TRUE	19.8868
rs9606173	T	A	T	A	0.0175	-0.0537	0.101	0.5952	met-a-536	1.06e-07	0.0033	TRUE	28.1221
rs9606212	A	C	A	C	-0.0318	0.2252	0.1235	0.0682606	met-a-536	2.67e-10	0.005	TRUE	40.4496
rs10412803	T	C	T	C	0.0097	0.002	0.0978	0.9835	met-a-536	4.42e-08	0.0018	TRUE	29.0401
rs11089325	T	C	T	C	0.0227	-0.2085	0.1857	0.2614	met-a-536	1.19e-08	0.004	TRUE	32.2056
rs11485264	G	A	G	A	0.0119	-0.0606	0.0996	0.5425	met-a-536	6.74e-06	0.0026	TRUE	20.9482
rs11541479	A	G	A	G	-0.014	-0.106	0.1205	0.3794	met-a-536	3.06e-06	0.003	TRUE	21.7778
rs11949401	C	T	C	T	0.0079	0.004	0.0869	0.963	met-a-536	6.79e-06	0.0017	TRUE	21.5952
rs12471416	G	A	G	A	0.008	-0.0761	0.0907	0.4016	met-a-536	4.56e-06	0.0017	TRUE	22.1453
rs1424092	T	G	T	G	-0.0092	-0.0494	0.0821	0.547599	met-a-536	1.78e-07	0.0018	TRUE	26.1235
rs1540603	A	C	A	C	-0.0676	-0.1033	0.5583	0.8533	met-a-536	7e-06	0.015	TRUE	20.31
rs1548357	C	T	C	T	0.0106	-0.1025	0.0857	0.2319	met-a-536	4.93e-09	0.0018	TRUE	34.679
rs1566481	G	A	G	A	-0.0083	-0.0417	0.0905	0.6447	met-a-536	7.7e-06	0.0019	TRUE	19.0831
rs16844839	T	C	T	C	-0.0113	-0.0137	0.0892	0.8778	met-a-536	5e-06	0.0025	TRUE	20.4304
rs16982844	A	C	A	C	-0.0423	0.2589	0.1895	0.172	met-a-536	9.08e-10	0.0069	TRUE	37.5822
rs175197	T	C	T	C	-0.0137	0.0889	0.0819	0.278	met-a-536	2.1e-15	0.0017	TRUE	64.9446
rs1919817	C	T	C	T	0.0241	0.0179	0.1457	0.9024	met-a-536	7.02e-06	0.0054	TRUE	19.918
rs2009217	C	T	C	T	0.0081	-0.1195	0.0992	0.2281	met-a-536	4.91e-06	0.0018	TRUE	20.25
rs2188839	G	A	G	A	-0.0115	0.1879	0.1144	0.1007	met-a-536	7.47e-06	0.0026	TRUE	19.5636
rs2205212	G	A	G	A	-0.0078	-0.0757	0.0852	0.3741	met-a-536	9.37e-06	0.0018	TRUE	18.7778
rs2239393	G	A	G	A	0.0334	-0.2203	0.0872	0.0115199	met-a-536	4.6e-83	0.0017	TRUE	386.007
rs2295465	C	A	C	A	0.0118	0.0528	0.1379	0.701699	met-a-536	6.65e-06	0.0026	TRUE	20.5976
rs2382376	T	C	T	C	0.0081	-0.0606	0.0945	0.5215	met-a-536	6.5e-06	0.0018	TRUE	20.25
rs282145	C	T	C	T	-0.0087	0.05	0.0866	0.5636	met-a-536	7.18e-07	0.0018	TRUE	23.3611
rs2871047	A	G	A	G	0.0429	0.2323	0.1321	0.0785597	met-a-536	3.8e-22	0.0044	TRUE	95.0625
rs3804043	A	C	A	C	0.0178	-0.0173	0.0925	0.8515	met-a-536	7.76e-24	0.0018	TRUE	97.7901
rs3856584	T	C	T	C	0.0078	-0.1557	0.0851	0.0673798	met-a-536	6.62e-06	0.0017	TRUE	21.0519
rs3887893	C	T	C	T	-0.009	-0.1451	0.0839	0.0837896	met-a-536	6.8e-06	0.002	TRUE	20.25
rs417309	A	G	A	G	-0.0167	0.1604	0.1258	0.2024	met-a-536	9.11e-07	0.0034	TRUE	24.1254
rs4846728	T	C	T	C	-0.0079	0.0731	0.0886	0.4098	met-a-536	8.14e-06	0.0018	TRUE	19.2623
rs549114	A	G	A	G	0.0086	0.1106	0.0847	0.1918	met-a-536	7.57e-07	0.0017	TRUE	25.5917
rs5993891	T	C	T	C	0.0337	0.106	0.2335	0.649901	met-a-536	8.45e-15	0.0043	TRUE	61.4218
rs6824211	A	G	A	G	-0.0091	-0.0071	0.0843	0.9328	met-a-536	2.16e-07	0.0017	TRUE	28.654
rs7255053	C	A	C	A	-0.0078	-0.0069	0.0901	0.939	met-a-536	6.36e-06	0.0017	TRUE	21.0519
rs7290062	C	T	C	T	0.0168	-0.1454	0.1415	0.3043	met-a-536	2.24e-11	0.0025	TRUE	45.1584
rs7707010	G	A	G	A	-0.0252	0.252	0.2048	0.2186	met-a-536	9.61e-09	0.0044	TRUE	32.8017
rs7748892	G	A	G	A	-0.0287	0.5583	0.2533	0.0274998	met-a-536	4.29e-07	0.0057	TRUE	25.3521
rs8038921	A	C	A	C	0.0117	-0.0477	0.1265	0.7063	met-a-536	4.67e-06	0.0025	TRUE	21.9024
rs866142	G	A	G	A	-0.008	0.108	0.0858	0.2083	met-a-536	3.79e-06	0.0017	TRUE	22.1453
rs9318225	C	T	C	T	0.0106	0.0394	0.0841	0.6399	met-a-536	1.95e-09	0.0018	TRUE	34.679
rs9558480	G	A	G	A	0.0165	-0.0107	0.0923	0.9077	met-a-536	7.84e-06	0.0037	TRUE	19.8868
rs9606173	T	A	T	A	0.0175	-0.0537	0.101	0.5952	met-a-536	1.06e-07	0.0033	TRUE	28.1221
rs9606212	A	C	A	C	-0.0318	0.2252	0.1235	0.0682606	met-a-536	2.67e-10	0.005	TRUE	40.4496
rs10412803	T	C	T	C	0.0097	0.002	0.0978	0.9835	met-a-536	4.42e-08	0.0018	TRUE	29.0401
rs11089325	T	C	T	C	0.0227	-0.2085	0.1857	0.2614	met-a-536	1.19e-08	0.004	TRUE	32.2056
rs11485264	G	A	G	A	0.0119	-0.0606	0.0996	0.5425	met-a-536	6.74e-06	0.0026	TRUE	20.9482
rs11541479	A	G	A	G	-0.014	-0.106	0.1205	0.3794	met-a-536	3.06e-06	0.003	TRUE	21.7778
rs11949401	C	T	C	T	0.0079	0.004	0.0869	0.963	met-a-536	6.79e-06	0.0017	TRUE	21.5952
rs12471416	G	A	G	A	0.008	-0.0761	0.0907	0.4016	met-a-536	4.56e-06	0.0017	TRUE	22.1453
rs1424092	T	G	T	G	-0.0092	-0.0494	0.0821	0.547599	met-a-536	1.78e-07	0.0018	TRUE	26.1235
rs1540603	A	C	A	C	-0.0676	-0.1033	0.5583	0.8533	met-a-536	7e-06	0.015	TRUE	20.31
rs1548357	C	T	C	T	0.0106	-0.1025	0.0857	0.2319	met-a-536	4.93e-09	0.0018	TRUE	34.679
rs1566481	G	A	G	A	-0.0083	-0.0417	0.0905	0.6447	met-a-536	7.7e-06	0.0019	TRUE	19.0831
rs16844839	T	C	T	C	-0.0113	-0.0137	0.0892	0.8778	met-a-536	5e-06	0.0025	TRUE	20.4304
rs16982844	A	C	A	C	-0.0423	0.2589	0.1895	0.172	met-a-536	9.08e-10	0.0069	TRUE	37.5822
rs175197	T	C	T	C	-0.0137	0.0889	0.0819	0.278	met-a-536	2.1e-15	0.0017	TRUE	64.9446
rs1919817	C	T	C	T	0.0241	0.0179	0.1457	0.9024	met-a-536	7.02e-06	0.0054	TRUE	19.918
rs2009217	C	T	C	T	0.0081	-0.1195	0.0992	0.2281	met-a-536	4.91e-06	0.0018	TRUE	20.25
rs2188839	G	A	G	A	-0.0115	0.1879	0.1144	0.1007	met-a-536	7.47e-06	0.0026	TRUE	19.5636
rs2205212	G	A	G	A	-0.0078	-0.0757	0.0852	0.3741	met-a-536	9.37e-06	0.0018	TRUE	18.7778
rs2239393	G	A	G	A	0.0334	-0.2203	0.0872	0.0115199	met-a-536	4.6e-83	0.0017	TRUE	386.007
rs2295465	C	A	C	A	0.0118	0.0528	0.1379	0.701699	met-a-536	6.65e-06	0.0026	TRUE	20.5976
rs2382376	T	C	T	C	0.0081	-0.0606	0.0945	0.5215	met-a-536	6.5e-06	0.0018	TRUE	20.25
rs282145	C	T	C	T	-0.0087	0.05	0.0866	0.5636	met-a-536	7.18e-07	0.0018	TRUE	23.3611
rs2871047	A	G	A	G	0.0429	0.2323	0.1321	0.0785597	met-a-536	3.8e-22	0.0044	TRUE	95.0625
rs3804043	A	C	A	C	0.0178	-0.0173	0.0925	0.8515	met-a-536	7.76e-24	0.0018	TRUE	97.7901
rs3856584	T	C	T	C	0.0078	-0.1557	0.0851	0.0673798	met-a-536	6.62e-06	0.0017	TRUE	21.0519
rs3887893	C	T	C	T	-0.009	-0.1451	0.0839	0.0837896	met-a-536	6.8e-06	0.002	TRUE	20.25
rs417309	A	G	A	G	-0.0167	0.1604	0.1258	0.2024	met-a-536	9.11e-07	0.0034	TRUE	24.1254
rs4846728	T	C	T	C	-0.0079	0.0731	0.0886	0.4098	met-a-536	8.14e-06	0.0018	TRUE	19.2623
rs549114	A	G	A	G	0.0086	0.1106	0.0847	0.1918	met-a-536	7.57e-07	0.0017	TRUE	25.5917
rs5993891	T	C	T	C	0.0337	0.106	0.2335	0.649901	met-a-536	8.45e-15	0.0043	TRUE	61.4218
rs6824211	A	G	A	G	-0.0091	-0.0071	0.0843	0.9328	met-a-536	2.16e-07	0.0017	TRUE	28.654
rs7255053	C	A	C	A	-0.0078	-0.0069	0.0901	0.939	met-a-536	6.36e-06	0.0017	TRUE	21.0519
rs7290062	C	T	C	T	0.0168	-0.1454	0.1415	0.3043	met-a-536	2.24e-11	0.0025	TRUE	45.1584
rs7707010	G	A	G	A	-0.0252	0.252	0.2048	0.2186	met-a-536	9.61e-09	0.0044	TRUE	32.8017
rs7748892	G	A	G	A	-0.0287	0.5583	0.2533	0.0274998	met-a-536	4.29e-07	0.0057	TRUE	25.3521
rs8038921	A	C	A	C	0.0117	-0.0477	0.1265	0.7063	met-a-536	4.67e-06	0.0025	TRUE	21.9024
rs866142	G	A	G	A	-0.008	0.108	0.0858	0.2083	met-a-536	3.79e-06	0.0017	TRUE	22.1453
rs9318225	C	T	C	T	0.0106	0.0394	0.0841	0.6399	met-a-536	1.95e-09	0.0018	TRUE	34.679
rs9558480	G	A	G	A	0.0165	-0.0107	0.0923	0.9077	met-a-536	7.84e-06	0.0037	TRUE	19.8868
rs9606173	T	A	T	A	0.0175	-0.0537	0.101	0.5952	met-a-536	1.06e-07	0.0033	TRUE	28.1221
rs9606212	A	C	A	C	-0.0318	0.2252	0.1235	0.0682606	met-a-536	2.67e-10	0.005	TRUE	40.4496
rs10412803	T	C	T	C	0.0097	0.002	0.0978	0.9835	met-a-536	4.42e-08	0.0018	TRUE	29.0401
rs11089325	T	C	T	C	0.0227	-0.2085	0.1857	0.2614	met-a-536	1.19e-08	0.004	TRUE	32.2056
rs11485264	G	A	G	A	0.0119	-0.0606	0.0996	0.5425	met-a-536	6.74e-06	0.0026	TRUE	20.9482
rs11541479	A	G	A	G	-0.014	-0.106	0.1205	0.3794	met-a-536	3.06e-06	0.003	TRUE	21.7778
rs11949401	C	T	C	T	0.0079	0.004	0.0869	0.963	met-a-536	6.79e-06	0.0017	TRUE	21.5952
rs12471416	G	A	G	A	0.008	-0.0761	0.0907	0.4016	met-a-536	4.56e-06	0.0017	TRUE	22.1453
rs1424092	T	G	T	G	-0.0092	-0.0494	0.0821	0.547599	met-a-536	1.78e-07	0.0018	TRUE	26.1235
rs1540603	A	C	A	C	-0.0676	-0.1033	0.5583	0.8533	met-a-536	7e-06	0.015	TRUE	20.31
rs1548357	C	T	C	T	0.0106	-0.1025	0.0857	0.2319	met-a-536	4.93e-09	0.0018	TRUE	34.679
rs1566481	G	A	G	A	-0.0083	-0.0417	0.0905	0.6447	met-a-536	7.7e-06	0.0019	TRUE	19.0831
rs16844839	T	C	T	C	-0.0113	-0.0137	0.0892	0.8778	met-a-536	5e-06	0.0025	TRUE	20.4304
rs16982844	A	C	A	C	-0.0423	0.2589	0.1895	0.172	met-a-536	9.08e-10	0.0069	TRUE	37.5822
rs175197	T	C	T	C	-0.0137	0.0889	0.0819	0.278	met-a-536	2.1e-15	0.0017	TRUE	64.9446
rs1919817	C	T	C	T	0.0241	0.0179	0.1457	0.9024	met-a-536	7.02e-06	0.0054	TRUE	19.918
rs2009217	C	T	C	T	0.0081	-0.1195	0.0992	0.2281	met-a-536	4.91e-06	0.0018	TRUE	20.25
rs2188839	G	A	G	A	-0.0115	0.1879	0.1144	0.1007	met-a-536	7.47e-06	0.0026	TRUE	19.5636
rs2205212	G	A	G	A	-0.0078	-0.0757	0.0852	0.3741	met-a-536	9.37e-06	0.0018	TRUE	18.7778
rs2239393	G	A	G	A	0.0334	-0.2203	0.0872	0.0115199	met-a-536	4.6e-83	0.0017	TRUE	386.007
rs2295465	C	A	C	A	0.0118	0.0528	0.1379	0.701699	met-a-536	6.65e-06	0.0026	TRUE	20.5976
rs2382376	T	C	T	C	0.0081	-0.0606	0.0945	0.5215	met-a-536	6.5e-06	0.0018	TRUE	20.25
rs282145	C	T	C	T	-0.0087	0.05	0.0866	0.5636	met-a-536	7.18e-07	0.0018	TRUE	23.3611
rs2871047	A	G	A	G	0.0429	0.2323	0.1321	0.0785597	met-a-536	3.8e-22	0.0044	TRUE	95.0625
rs3804043	A	C	A	C	0.0178	-0.0173	0.0925	0.8515	met-a-536	7.76e-24	0.0018	TRUE	97.7901
rs3856584	T	C	T	C	0.0078	-0.1557	0.0851	0.0673798	met-a-536	6.62e-06	0.0017	TRUE	21.0519
rs3887893	C	T	C	T	-0.009	-0.1451	0.0839	0.0837896	met-a-536	6.8e-06	0.002	TRUE	20.25
rs417309	A	G	A	G	-0.0167	0.1604	0.1258	0.2024	met-a-536	9.11e-07	0.0034	TRUE	24.1254
rs4846728	T	C	T	C	-0.0079	0.0731	0.0886	0.4098	met-a-536	8.14e-06	0.0018	TRUE	19.2623
rs549114	A	G	A	G	0.0086	0.1106	0.0847	0.1918	met-a-536	7.57e-07	0.0017	TRUE	25.5917
rs5993891	T	C	T	C	0.0337	0.106	0.2335	0.649901	met-a-536	8.45e-15	0.0043	TRUE	61.4218
rs6824211	A	G	A	G	-0.0091	-0.0071	0.0843	0.9328	met-a-536	2.16e-07	0.0017	TRUE	28.654
rs7255053	C	A	C	A	-0.0078	-0.0069	0.0901	0.939	met-a-536	6.36e-06	0.0017	TRUE	21.0519
rs7290062	C	T	C	T	0.0168	-0.1454	0.1415	0.3043	met-a-536	2.24e-11	0.0025	TRUE	45.1584
rs7707010	G	A	G	A	-0.0252	0.252	0.2048	0.2186	met-a-536	9.61e-09	0.0044	TRUE	32.8017
rs7748892	G	A	G	A	-0.0287	0.5583	0.2533	0.0274998	met-a-536	4.29e-07	0.0057	TRUE	25.3521
rs8038921	A	C	A	C	0.0117	-0.0477	0.1265	0.7063	met-a-536	4.67e-06	0.0025	TRUE	21.9024
rs866142	G	A	G	A	-0.008	0.108	0.0858	0.2083	met-a-536	3.79e-06	0.0017	TRUE	22.1453
rs9318225	C	T	C	T	0.0106	0.0394	0.0841	0.6399	met-a-536	1.95e-09	0.0018	TRUE	34.679
rs9558480	G	A	G	A	0.0165	-0.0107	0.0923	0.9077	met-a-536	7.84e-06	0.0037	TRUE	19.8868
rs9606173	T	A	T	A	0.0175	-0.0537	0.101	0.5952	met-a-536	1.06e-07	0.0033	TRUE	28.1221
rs9606212	A	C	A	C	-0.0318	0.2252	0.1235	0.0682606	met-a-536	2.67e-10	0.005	TRUE	40.4496
rs10412803	T	C	T	C	0.0097	0.002	0.0978	0.9835	met-a-536	4.42e-08	0.0018	TRUE	29.0401
rs11089325	T	C	T	C	0.0227	-0.2085	0.1857	0.2614	met-a-536	1.19e-08	0.004	TRUE	32.2056
rs11485264	G	A	G	A	0.0119	-0.0606	0.0996	0.5425	met-a-536	6.74e-06	0.0026	TRUE	20.9482
rs11541479	A	G	A	G	-0.014	-0.106	0.1205	0.3794	met-a-536	3.06e-06	0.003	TRUE	21.7778
rs11949401	C	T	C	T	0.0079	0.004	0.0869	0.963	met-a-536	6.79e-06	0.0017	TRUE	21.5952
rs12471416	G	A	G	A	0.008	-0.0761	0.0907	0.4016	met-a-536	4.56e-06	0.0017	TRUE	22.1453
rs1424092	T	G	T	G	-0.0092	-0.0494	0.0821	0.547599	met-a-536	1.78e-07	0.0018	TRUE	26.1235
rs1540603	A	C	A	C	-0.0676	-0.1033	0.5583	0.8533	met-a-536	7e-06	0.015	TRUE	20.31
rs1548357	C	T	C	T	0.0106	-0.1025	0.0857	0.2319	met-a-536	4.93e-09	0.0018	TRUE	34.679
rs1566481	G	A	G	A	-0.0083	-0.0417	0.0905	0.6447	met-a-536	7.7e-06	0.0019	TRUE	19.0831
rs16844839	T	C	T	C	-0.0113	-0.0137	0.0892	0.8778	met-a-536	5e-06	0.0025	TRUE	20.4304
rs16982844	A	C	A	C	-0.0423	0.2589	0.1895	0.172	met-a-536	9.08e-10	0.0069	TRUE	37.5822
rs175197	T	C	T	C	-0.0137	0.0889	0.0819	0.278	met-a-536	2.1e-15	0.0017	TRUE	64.9446
rs1919817	C	T	C	T	0.0241	0.0179	0.1457	0.9024	met-a-536	7.02e-06	0.0054	TRUE	19.918
rs2009217	C	T	C	T	0.0081	-0.1195	0.0992	0.2281	met-a-536	4.91e-06	0.0018	TRUE	20.25
rs2188839	G	A	G	A	-0.0115	0.1879	0.1144	0.1007	met-a-536	7.47e-06	0.0026	TRUE	19.5636
rs2205212	G	A	G	A	-0.0078	-0.0757	0.0852	0.3741	met-a-536	9.37e-06	0.0018	TRUE	18.7778
rs2239393	G	A	G	A	0.0334	-0.2203	0.0872	0.0115199	met-a-536	4.6e-83	0.0017	TRUE	386.007
rs2295465	C	A	C	A	0.0118	0.0528	0.1379	0.701699	met-a-536	6.65e-06	0.0026	TRUE	20.5976
rs2382376	T	C	T	C	0.0081	-0.0606	0.0945	0.5215	met-a-536	6.5e-06	0.0018	TRUE	20.25
rs282145	C	T	C	T	-0.0087	0.05	0.0866	0.5636	met-a-536	7.18e-07	0.0018	TRUE	23.3611
rs2871047	A	G	A	G	0.0429	0.2323	0.1321	0.0785597	met-a-536	3.8e-22	0.0044	TRUE	95.0625
rs3804043	A	C	A	C	0.0178	-0.0173	0.0925	0.8515	met-a-536	7.76e-24	0.0018	TRUE	97.7901
rs3856584	T	C	T	C	0.0078	-0.1557	0.0851	0.0673798	met-a-536	6.62e-06	0.0017	TRUE	21.0519
rs3887893	C	T	C	T	-0.009	-0.1451	0.0839	0.0837896	met-a-536	6.8e-06	0.002	TRUE	20.25
rs417309	A	G	A	G	-0.0167	0.1604	0.1258	0.2024	met-a-536	9.11e-07	0.0034	TRUE	24.1254
rs4846728	T	C	T	C	-0.0079	0.0731	0.0886	0.4098	met-a-536	8.14e-06	0.0018	TRUE	19.2623
rs549114	A	G	A	G	0.0086	0.1106	0.0847	0.1918	met-a-536	7.57e-07	0.0017	TRUE	25.5917
rs5993891	T	C	T	C	0.0337	0.106	0.2335	0.649901	met-a-536	8.45e-15	0.0043	TRUE	61.4218
rs6824211	A	G	A	G	-0.0091	-0.0071	0.0843	0.9328	met-a-536	2.16e-07	0.0017	TRUE	28.654
rs7255053	C	A	C	A	-0.0078	-0.0069	0.0901	0.939	met-a-536	6.36e-06	0.0017	TRUE	21.0519
rs7290062	C	T	C	T	0.0168	-0.1454	0.1415	0.3043	met-a-536	2.24e-11	0.0025	TRUE	45.1584
rs7707010	G	A	G	A	-0.0252	0.252	0.2048	0.2186	met-a-536	9.61e-09	0.0044	TRUE	32.8017
rs7748892	G	A	G	A	-0.0287	0.5583	0.2533	0.0274998	met-a-536	4.29e-07	0.0057	TRUE	25.3521
rs8038921	A	C	A	C	0.0117	-0.0477	0.1265	0.7063	met-a-536	4.67e-06	0.0025	TRUE	21.9024
rs866142	G	A	G	A	-0.008	0.108	0.0858	0.2083	met-a-536	3.79e-06	0.0017	TRUE	22.1453
rs9318225	C	T	C	T	0.0106	0.0394	0.0841	0.6399	met-a-536	1.95e-09	0.0018	TRUE	34.679
rs9558480	G	A	G	A	0.0165	-0.0107	0.0923	0.9077	met-a-536	7.84e-06	0.0037	TRUE	19.8868
rs9606173	T	A	T	A	0.0175	-0.0537	0.101	0.5952	met-a-536	1.06e-07	0.0033	TRUE	28.1221
rs9606212	A	C	A	C	-0.0318	0.2252	0.1235	0.0682606	met-a-536	2.67e-10	0.005	TRUE	40.4496
rs10181532	A	G	A	G	-0.0633	0.3489	0.2327	0.1339	met-a-560	7.97e-06	0.0142	TRUE	19.8715
rs10505870	A	G	A	G	0.0264	-0.0769	0.1017	0.4492	met-a-560	4.79e-08	0.0048	TRUE	30.25
rs11049633	G	A	G	A	-0.0816	0.4431	0.604	0.4632	met-a-560	3.41e-06	0.0176	TRUE	21.4959
rs12370842	A	G	A	G	-0.0588	0.0828	0.1216	0.4962	met-a-560	6.67e-24	0.0058	TRUE	102.778
rs12629322	C	T	C	T	0.0233	-0.0562	0.0981	0.5668	met-a-560	1.44e-06	0.0048	TRUE	23.5629
rs12810446	T	C	T	C	-0.0231	0.0727	0.0855	0.3954	met-a-560	1.99e-06	0.0049	TRUE	22.2245
rs12820524	C	T	C	T	-0.0959	0.2983	0.3637	0.4121	met-a-560	8.77e-06	0.0216	TRUE	19.712
rs13432322	T	C	T	C	-0.0933	-0.332	0.1964	0.090939	met-a-560	1.27e-06	0.0193	TRUE	23.3695
rs1572603	A	G	A	G	-0.033	-0.0764	0.1278	0.5501	met-a-560	2.43e-06	0.007	TRUE	22.2245
rs17207792	T	C	T	C	0.0429	-0.1547	0.0871	0.0756293	met-a-560	1.91e-06	0.009	TRUE	22.7211
rs17479238	C	G	C	G	-0.0436	-0.0505	0.2095	0.8094	met-a-560	3.76e-06	0.0094	TRUE	21.5138
rs1994459	G	A	G	A	0.1746	0.0182	0.1735	0.9165	met-a-560	7.14e-06	0.0389	TRUE	20.146
rs2016979	C	T	C	T	-0.0304	0.0278	0.0968	0.773599	met-a-560	7.48e-06	0.0068	TRUE	19.9862
rs2291073	G	T	G	T	-0.0387	-0.0277	0.1186	0.8152	met-a-560	7.91e-06	0.0087	TRUE	19.7872
rs2526978	T	C	T	C	-0.0228	0.0593	0.0867	0.4935	met-a-560	2.63e-06	0.0049	TRUE	21.651
rs2561284	T	G	T	G	0.1012	-0.1743	0.1137	0.1252	met-a-560	7.71e-06	0.0226	TRUE	20.0514
rs4149056	C	T	C	T	0.0827	-0.1399	0.1014	0.1677	met-a-560	1.08e-47	0.0057	TRUE	210.504
rs4767064	A	G	A	G	0.0216	-0.0903	0.1011	0.3717	met-a-560	8.17e-06	0.0048	TRUE	20.25
rs4775058	A	G	A	G	0.0663	0.2911	0.3377	0.3887	met-a-560	3.85e-06	0.0144	TRUE	21.1984
rs7238314	G	T	G	T	0.0775	0.4336	0.3813	0.2555	met-a-560	1.49e-06	0.0161	TRUE	23.1714
rs7926241	A	G	A	G	0.0887	-1.0286	0.8227	0.2112	met-a-560	8.34e-06	0.0199	TRUE	19.8674
rs10181532	A	G	A	G	-0.0633	0.3489	0.2327	0.1339	met-a-560	7.97e-06	0.0142	TRUE	19.8715
rs10505870	A	G	A	G	0.0264	-0.0769	0.1017	0.4492	met-a-560	4.79e-08	0.0048	TRUE	30.25
rs11049633	G	A	G	A	-0.0816	0.4431	0.604	0.4632	met-a-560	3.41e-06	0.0176	TRUE	21.4959
rs12370842	A	G	A	G	-0.0588	0.0828	0.1216	0.4962	met-a-560	6.67e-24	0.0058	TRUE	102.778
rs12629322	C	T	C	T	0.0233	-0.0562	0.0981	0.5668	met-a-560	1.44e-06	0.0048	TRUE	23.5629
rs12810446	T	C	T	C	-0.0231	0.0727	0.0855	0.3954	met-a-560	1.99e-06	0.0049	TRUE	22.2245
rs12820524	C	T	C	T	-0.0959	0.2983	0.3637	0.4121	met-a-560	8.77e-06	0.0216	TRUE	19.712
rs13432322	T	C	T	C	-0.0933	-0.332	0.1964	0.090939	met-a-560	1.27e-06	0.0193	TRUE	23.3695
rs1572603	A	G	A	G	-0.033	-0.0764	0.1278	0.5501	met-a-560	2.43e-06	0.007	TRUE	22.2245
rs17207792	T	C	T	C	0.0429	-0.1547	0.0871	0.0756293	met-a-560	1.91e-06	0.009	TRUE	22.7211
rs17479238	C	G	C	G	-0.0436	-0.0505	0.2095	0.8094	met-a-560	3.76e-06	0.0094	TRUE	21.5138
rs1994459	G	A	G	A	0.1746	0.0182	0.1735	0.9165	met-a-560	7.14e-06	0.0389	TRUE	20.146
rs2016979	C	T	C	T	-0.0304	0.0278	0.0968	0.773599	met-a-560	7.48e-06	0.0068	TRUE	19.9862
rs2291073	G	T	G	T	-0.0387	-0.0277	0.1186	0.8152	met-a-560	7.91e-06	0.0087	TRUE	19.7872
rs2526978	T	C	T	C	-0.0228	0.0593	0.0867	0.4935	met-a-560	2.63e-06	0.0049	TRUE	21.651
rs2561284	T	G	T	G	0.1012	-0.1743	0.1137	0.1252	met-a-560	7.71e-06	0.0226	TRUE	20.0514
rs4149056	C	T	C	T	0.0827	-0.1399	0.1014	0.1677	met-a-560	1.08e-47	0.0057	TRUE	210.504
rs4767064	A	G	A	G	0.0216	-0.0903	0.1011	0.3717	met-a-560	8.17e-06	0.0048	TRUE	20.25
rs4775058	A	G	A	G	0.0663	0.2911	0.3377	0.3887	met-a-560	3.85e-06	0.0144	TRUE	21.1984
rs7238314	G	T	G	T	0.0775	0.4336	0.3813	0.2555	met-a-560	1.49e-06	0.0161	TRUE	23.1714
rs7926241	A	G	A	G	0.0887	-1.0286	0.8227	0.2112	met-a-560	8.34e-06	0.0199	TRUE	19.8674
rs10181532	A	G	A	G	-0.0633	0.3489	0.2327	0.1339	met-a-560	7.97e-06	0.0142	TRUE	19.8715
rs10505870	A	G	A	G	0.0264	-0.0769	0.1017	0.4492	met-a-560	4.79e-08	0.0048	TRUE	30.25
rs11049633	G	A	G	A	-0.0816	0.4431	0.604	0.4632	met-a-560	3.41e-06	0.0176	TRUE	21.4959
rs12370842	A	G	A	G	-0.0588	0.0828	0.1216	0.4962	met-a-560	6.67e-24	0.0058	TRUE	102.778
rs12629322	C	T	C	T	0.0233	-0.0562	0.0981	0.5668	met-a-560	1.44e-06	0.0048	TRUE	23.5629
rs12810446	T	C	T	C	-0.0231	0.0727	0.0855	0.3954	met-a-560	1.99e-06	0.0049	TRUE	22.2245
rs12820524	C	T	C	T	-0.0959	0.2983	0.3637	0.4121	met-a-560	8.77e-06	0.0216	TRUE	19.712
rs13432322	T	C	T	C	-0.0933	-0.332	0.1964	0.090939	met-a-560	1.27e-06	0.0193	TRUE	23.3695
rs1572603	A	G	A	G	-0.033	-0.0764	0.1278	0.5501	met-a-560	2.43e-06	0.007	TRUE	22.2245
rs17207792	T	C	T	C	0.0429	-0.1547	0.0871	0.0756293	met-a-560	1.91e-06	0.009	TRUE	22.7211
rs17479238	C	G	C	G	-0.0436	-0.0505	0.2095	0.8094	met-a-560	3.76e-06	0.0094	TRUE	21.5138
rs1994459	G	A	G	A	0.1746	0.0182	0.1735	0.9165	met-a-560	7.14e-06	0.0389	TRUE	20.146
rs2016979	C	T	C	T	-0.0304	0.0278	0.0968	0.773599	met-a-560	7.48e-06	0.0068	TRUE	19.9862
rs2291073	G	T	G	T	-0.0387	-0.0277	0.1186	0.8152	met-a-560	7.91e-06	0.0087	TRUE	19.7872
rs2526978	T	C	T	C	-0.0228	0.0593	0.0867	0.4935	met-a-560	2.63e-06	0.0049	TRUE	21.651
rs2561284	T	G	T	G	0.1012	-0.1743	0.1137	0.1252	met-a-560	7.71e-06	0.0226	TRUE	20.0514
rs4149056	C	T	C	T	0.0827	-0.1399	0.1014	0.1677	met-a-560	1.08e-47	0.0057	TRUE	210.504
rs4767064	A	G	A	G	0.0216	-0.0903	0.1011	0.3717	met-a-560	8.17e-06	0.0048	TRUE	20.25
rs4775058	A	G	A	G	0.0663	0.2911	0.3377	0.3887	met-a-560	3.85e-06	0.0144	TRUE	21.1984
rs7238314	G	T	G	T	0.0775	0.4336	0.3813	0.2555	met-a-560	1.49e-06	0.0161	TRUE	23.1714
rs7926241	A	G	A	G	0.0887	-1.0286	0.8227	0.2112	met-a-560	8.34e-06	0.0199	TRUE	19.8674
rs10181532	A	G	A	G	-0.0633	0.3489	0.2327	0.1339	met-a-560	7.97e-06	0.0142	TRUE	19.8715
rs10505870	A	G	A	G	0.0264	-0.0769	0.1017	0.4492	met-a-560	4.79e-08	0.0048	TRUE	30.25
rs11049633	G	A	G	A	-0.0816	0.4431	0.604	0.4632	met-a-560	3.41e-06	0.0176	TRUE	21.4959
rs12370842	A	G	A	G	-0.0588	0.0828	0.1216	0.4962	met-a-560	6.67e-24	0.0058	TRUE	102.778
rs12629322	C	T	C	T	0.0233	-0.0562	0.0981	0.5668	met-a-560	1.44e-06	0.0048	TRUE	23.5629
rs12810446	T	C	T	C	-0.0231	0.0727	0.0855	0.3954	met-a-560	1.99e-06	0.0049	TRUE	22.2245
rs12820524	C	T	C	T	-0.0959	0.2983	0.3637	0.4121	met-a-560	8.77e-06	0.0216	TRUE	19.712
rs13432322	T	C	T	C	-0.0933	-0.332	0.1964	0.090939	met-a-560	1.27e-06	0.0193	TRUE	23.3695
rs1572603	A	G	A	G	-0.033	-0.0764	0.1278	0.5501	met-a-560	2.43e-06	0.007	TRUE	22.2245
rs17207792	T	C	T	C	0.0429	-0.1547	0.0871	0.0756293	met-a-560	1.91e-06	0.009	TRUE	22.7211
rs17479238	C	G	C	G	-0.0436	-0.0505	0.2095	0.8094	met-a-560	3.76e-06	0.0094	TRUE	21.5138
rs1994459	G	A	G	A	0.1746	0.0182	0.1735	0.9165	met-a-560	7.14e-06	0.0389	TRUE	20.146
rs2016979	C	T	C	T	-0.0304	0.0278	0.0968	0.773599	met-a-560	7.48e-06	0.0068	TRUE	19.9862
rs2291073	G	T	G	T	-0.0387	-0.0277	0.1186	0.8152	met-a-560	7.91e-06	0.0087	TRUE	19.7872
rs2526978	T	C	T	C	-0.0228	0.0593	0.0867	0.4935	met-a-560	2.63e-06	0.0049	TRUE	21.651
rs2561284	T	G	T	G	0.1012	-0.1743	0.1137	0.1252	met-a-560	7.71e-06	0.0226	TRUE	20.0514
rs4149056	C	T	C	T	0.0827	-0.1399	0.1014	0.1677	met-a-560	1.08e-47	0.0057	TRUE	210.504
rs4767064	A	G	A	G	0.0216	-0.0903	0.1011	0.3717	met-a-560	8.17e-06	0.0048	TRUE	20.25
rs4775058	A	G	A	G	0.0663	0.2911	0.3377	0.3887	met-a-560	3.85e-06	0.0144	TRUE	21.1984
rs7238314	G	T	G	T	0.0775	0.4336	0.3813	0.2555	met-a-560	1.49e-06	0.0161	TRUE	23.1714
rs7926241	A	G	A	G	0.0887	-1.0286	0.8227	0.2112	met-a-560	8.34e-06	0.0199	TRUE	19.8674
rs10181532	A	G	A	G	-0.0633	0.3489	0.2327	0.1339	met-a-560	7.97e-06	0.0142	TRUE	19.8715
rs10505870	A	G	A	G	0.0264	-0.0769	0.1017	0.4492	met-a-560	4.79e-08	0.0048	TRUE	30.25
rs11049633	G	A	G	A	-0.0816	0.4431	0.604	0.4632	met-a-560	3.41e-06	0.0176	TRUE	21.4959
rs12370842	A	G	A	G	-0.0588	0.0828	0.1216	0.4962	met-a-560	6.67e-24	0.0058	TRUE	102.778
rs12629322	C	T	C	T	0.0233	-0.0562	0.0981	0.5668	met-a-560	1.44e-06	0.0048	TRUE	23.5629
rs12810446	T	C	T	C	-0.0231	0.0727	0.0855	0.3954	met-a-560	1.99e-06	0.0049	TRUE	22.2245
rs12820524	C	T	C	T	-0.0959	0.2983	0.3637	0.4121	met-a-560	8.77e-06	0.0216	TRUE	19.712
rs13432322	T	C	T	C	-0.0933	-0.332	0.1964	0.090939	met-a-560	1.27e-06	0.0193	TRUE	23.3695
rs1572603	A	G	A	G	-0.033	-0.0764	0.1278	0.5501	met-a-560	2.43e-06	0.007	TRUE	22.2245
rs17207792	T	C	T	C	0.0429	-0.1547	0.0871	0.0756293	met-a-560	1.91e-06	0.009	TRUE	22.7211
rs17479238	C	G	C	G	-0.0436	-0.0505	0.2095	0.8094	met-a-560	3.76e-06	0.0094	TRUE	21.5138
rs1994459	G	A	G	A	0.1746	0.0182	0.1735	0.9165	met-a-560	7.14e-06	0.0389	TRUE	20.146
rs2016979	C	T	C	T	-0.0304	0.0278	0.0968	0.773599	met-a-560	7.48e-06	0.0068	TRUE	19.9862
rs2291073	G	T	G	T	-0.0387	-0.0277	0.1186	0.8152	met-a-560	7.91e-06	0.0087	TRUE	19.7872
rs2526978	T	C	T	C	-0.0228	0.0593	0.0867	0.4935	met-a-560	2.63e-06	0.0049	TRUE	21.651
rs2561284	T	G	T	G	0.1012	-0.1743	0.1137	0.1252	met-a-560	7.71e-06	0.0226	TRUE	20.0514
rs4149056	C	T	C	T	0.0827	-0.1399	0.1014	0.1677	met-a-560	1.08e-47	0.0057	TRUE	210.504
rs4767064	A	G	A	G	0.0216	-0.0903	0.1011	0.3717	met-a-560	8.17e-06	0.0048	TRUE	20.25
rs4775058	A	G	A	G	0.0663	0.2911	0.3377	0.3887	met-a-560	3.85e-06	0.0144	TRUE	21.1984
rs7238314	G	T	G	T	0.0775	0.4336	0.3813	0.2555	met-a-560	1.49e-06	0.0161	TRUE	23.1714
rs7926241	A	G	A	G	0.0887	-1.0286	0.8227	0.2112	met-a-560	8.34e-06	0.0199	TRUE	19.8674
rs10779577	A	G	A	G	0.0427	-0.0422	0.0878	0.6305	met-a-595	4.07e-06	0.0093	TRUE	21.0809
rs11046265	T	C	T	C	-0.0431	0.0698	0.0854	0.4138	met-a-595	2.53e-06	0.0092	TRUE	21.9472
rs13146757	T	C	T	C	0.1467	-0.428	0.3958	0.2796	met-a-595	1.02e-06	0.03	TRUE	23.9121
rs17358216	T	C	T	C	0.1099	-0.4209	0.2798	0.1325	met-a-595	2.36e-06	0.0233	TRUE	22.2476
rs4437239	C	T	C	T	0.0378	-0.1257	0.1057	0.2344	met-a-595	9.78e-06	0.0085	TRUE	19.7763
rs6502323	A	T	A	T	0.0434	0.0033	0.0893	0.9702	met-a-595	1.56e-07	0.0083	TRUE	27.3416
rs7956425	G	A	G	A	0.093	-0.1142	0.123	0.3531	met-a-595	1.21e-06	0.0191	TRUE	23.7082
rs10779577	A	G	A	G	0.0427	-0.0422	0.0878	0.6305	met-a-595	4.07e-06	0.0093	TRUE	21.0809
rs11046265	T	C	T	C	-0.0431	0.0698	0.0854	0.4138	met-a-595	2.53e-06	0.0092	TRUE	21.9472
rs13146757	T	C	T	C	0.1467	-0.428	0.3958	0.2796	met-a-595	1.02e-06	0.03	TRUE	23.9121
rs17358216	T	C	T	C	0.1099	-0.4209	0.2798	0.1325	met-a-595	2.36e-06	0.0233	TRUE	22.2476
rs4437239	C	T	C	T	0.0378	-0.1257	0.1057	0.2344	met-a-595	9.78e-06	0.0085	TRUE	19.7763
rs6502323	A	T	A	T	0.0434	0.0033	0.0893	0.9702	met-a-595	1.56e-07	0.0083	TRUE	27.3416
rs7956425	G	A	G	A	0.093	-0.1142	0.123	0.3531	met-a-595	1.21e-06	0.0191	TRUE	23.7082
rs10779577	A	G	A	G	0.0427	-0.0422	0.0878	0.6305	met-a-595	4.07e-06	0.0093	TRUE	21.0809
rs11046265	T	C	T	C	-0.0431	0.0698	0.0854	0.4138	met-a-595	2.53e-06	0.0092	TRUE	21.9472
rs13146757	T	C	T	C	0.1467	-0.428	0.3958	0.2796	met-a-595	1.02e-06	0.03	TRUE	23.9121
rs17358216	T	C	T	C	0.1099	-0.4209	0.2798	0.1325	met-a-595	2.36e-06	0.0233	TRUE	22.2476
rs4437239	C	T	C	T	0.0378	-0.1257	0.1057	0.2344	met-a-595	9.78e-06	0.0085	TRUE	19.7763
rs6502323	A	T	A	T	0.0434	0.0033	0.0893	0.9702	met-a-595	1.56e-07	0.0083	TRUE	27.3416
rs7956425	G	A	G	A	0.093	-0.1142	0.123	0.3531	met-a-595	1.21e-06	0.0191	TRUE	23.7082
rs10779577	A	G	A	G	0.0427	-0.0422	0.0878	0.6305	met-a-595	4.07e-06	0.0093	TRUE	21.0809
rs11046265	T	C	T	C	-0.0431	0.0698	0.0854	0.4138	met-a-595	2.53e-06	0.0092	TRUE	21.9472
rs13146757	T	C	T	C	0.1467	-0.428	0.3958	0.2796	met-a-595	1.02e-06	0.03	TRUE	23.9121
rs17358216	T	C	T	C	0.1099	-0.4209	0.2798	0.1325	met-a-595	2.36e-06	0.0233	TRUE	22.2476
rs4437239	C	T	C	T	0.0378	-0.1257	0.1057	0.2344	met-a-595	9.78e-06	0.0085	TRUE	19.7763
rs6502323	A	T	A	T	0.0434	0.0033	0.0893	0.9702	met-a-595	1.56e-07	0.0083	TRUE	27.3416
rs7956425	G	A	G	A	0.093	-0.1142	0.123	0.3531	met-a-595	1.21e-06	0.0191	TRUE	23.7082
rs10779577	A	G	A	G	0.0427	-0.0422	0.0878	0.6305	met-a-595	4.07e-06	0.0093	TRUE	21.0809
rs11046265	T	C	T	C	-0.0431	0.0698	0.0854	0.4138	met-a-595	2.53e-06	0.0092	TRUE	21.9472
rs13146757	T	C	T	C	0.1467	-0.428	0.3958	0.2796	met-a-595	1.02e-06	0.03	TRUE	23.9121
rs17358216	T	C	T	C	0.1099	-0.4209	0.2798	0.1325	met-a-595	2.36e-06	0.0233	TRUE	22.2476
rs4437239	C	T	C	T	0.0378	-0.1257	0.1057	0.2344	met-a-595	9.78e-06	0.0085	TRUE	19.7763
rs6502323	A	T	A	T	0.0434	0.0033	0.0893	0.9702	met-a-595	1.56e-07	0.0083	TRUE	27.3416
rs7956425	G	A	G	A	0.093	-0.1142	0.123	0.3531	met-a-595	1.21e-06	0.0191	TRUE	23.7082
rs10060182	A	G	A	G	-0.0274	-0.1649	0.0849	0.0519194	met-a-597	9.44e-06	0.0062	TRUE	19.5307
rs11681355	A	G	A	G	0.0275	-0.0208	0.0851	0.8066	met-a-597	7.56e-06	0.0061	TRUE	20.3238
rs11715075	T	C	T	C	-0.0283	-0.031	0.0866	0.7202	met-a-597	3.56e-06	0.0061	TRUE	21.5235
rs12503398	G	A	G	A	0.0307	0.2161	0.0869	0.01287	met-a-597	8.68e-06	0.0069	TRUE	19.7961
rs2957661	T	C	T	C	0.0308	0.0768	0.0883	0.3846	met-a-597	4.34e-07	0.0061	TRUE	25.4942
rs10060182	A	G	A	G	-0.0274	-0.1649	0.0849	0.0519194	met-a-597	9.44e-06	0.0062	TRUE	19.5307
rs11681355	A	G	A	G	0.0275	-0.0208	0.0851	0.8066	met-a-597	7.56e-06	0.0061	TRUE	20.3238
rs11715075	T	C	T	C	-0.0283	-0.031	0.0866	0.7202	met-a-597	3.56e-06	0.0061	TRUE	21.5235
rs12503398	G	A	G	A	0.0307	0.2161	0.0869	0.01287	met-a-597	8.68e-06	0.0069	TRUE	19.7961
rs2957661	T	C	T	C	0.0308	0.0768	0.0883	0.3846	met-a-597	4.34e-07	0.0061	TRUE	25.4942
rs10060182	A	G	A	G	-0.0274	-0.1649	0.0849	0.0519194	met-a-597	9.44e-06	0.0062	TRUE	19.5307
rs11681355	A	G	A	G	0.0275	-0.0208	0.0851	0.8066	met-a-597	7.56e-06	0.0061	TRUE	20.3238
rs11715075	T	C	T	C	-0.0283	-0.031	0.0866	0.7202	met-a-597	3.56e-06	0.0061	TRUE	21.5235
rs12503398	G	A	G	A	0.0307	0.2161	0.0869	0.01287	met-a-597	8.68e-06	0.0069	TRUE	19.7961
rs2957661	T	C	T	C	0.0308	0.0768	0.0883	0.3846	met-a-597	4.34e-07	0.0061	TRUE	25.4942
rs10060182	A	G	A	G	-0.0274	-0.1649	0.0849	0.0519194	met-a-597	9.44e-06	0.0062	TRUE	19.5307
rs11681355	A	G	A	G	0.0275	-0.0208	0.0851	0.8066	met-a-597	7.56e-06	0.0061	TRUE	20.3238
rs11715075	T	C	T	C	-0.0283	-0.031	0.0866	0.7202	met-a-597	3.56e-06	0.0061	TRUE	21.5235
rs12503398	G	A	G	A	0.0307	0.2161	0.0869	0.01287	met-a-597	8.68e-06	0.0069	TRUE	19.7961
rs2957661	T	C	T	C	0.0308	0.0768	0.0883	0.3846	met-a-597	4.34e-07	0.0061	TRUE	25.4942
rs10060182	A	G	A	G	-0.0274	-0.1649	0.0849	0.0519194	met-a-597	9.44e-06	0.0062	TRUE	19.5307
rs11681355	A	G	A	G	0.0275	-0.0208	0.0851	0.8066	met-a-597	7.56e-06	0.0061	TRUE	20.3238
rs11715075	T	C	T	C	-0.0283	-0.031	0.0866	0.7202	met-a-597	3.56e-06	0.0061	TRUE	21.5235
rs12503398	G	A	G	A	0.0307	0.2161	0.0869	0.01287	met-a-597	8.68e-06	0.0069	TRUE	19.7961
rs2957661	T	C	T	C	0.0308	0.0768	0.0883	0.3846	met-a-597	4.34e-07	0.0061	TRUE	25.4942
rs10510506	C	A	C	A	0.747	-0.1013	0.2087	0.627401	met-a-599	8.98e-06	0.1682	TRUE	19.7237
rs11563459	C	T	C	T	0.0914	-0.0407	0.1322	0.758099	met-a-599	5.78e-06	0.0202	TRUE	20.4734
rs12658525	T	C	T	C	0.1682	-0.2038	0.2166	0.3466	met-a-599	3.59e-06	0.0363	TRUE	21.4703
rs1322668	C	G	C	G	-0.0975	0.0136	0.1008	0.8923	met-a-599	3.92e-06	0.0211	TRUE	21.3523
rs16843794	C	T	C	T	0.7079	-0.2132	0.2437	0.3815	met-a-599	7.1e-07	0.1428	TRUE	24.5747
rs17082709	C	A	C	A	0.167	0.3082	0.1765	0.0808109	met-a-599	8.06e-06	0.0374	TRUE	19.9384
rs17091635	A	G	A	G	0.173	-0.6358	0.2792	0.0227898	met-a-599	2.93e-06	0.037	TRUE	21.8619
rs2292787	A	G	A	G	-0.6793	0.2938	0.149	0.0485803	met-a-599	6.93e-08	0.126	TRUE	29.0658
rs29766	A	G	A	G	0.1091	-0.3218	0.14	0.0215001	met-a-599	6.38e-06	0.0242	TRUE	20.3244
rs4670957	T	C	T	C	-0.0608	0.032	0.0812	0.6937	met-a-599	7.23e-06	0.0136	TRUE	19.9862
rs4822679	G	A	G	A	0.934	-1.0055	1.4891	0.499501	met-a-599	3.96e-06	0.2025	TRUE	21.2737
rs5998862	C	A	C	A	0.6716	0.0149	0.1872	0.9364	met-a-599	1.91e-06	0.141	TRUE	22.6873
rs6938476	T	C	T	C	0.0705	-0.13	0.0951	0.1719	met-a-599	5.38e-06	0.0155	TRUE	20.6878
rs7086346	A	G	A	G	0.0731	0.0496	0.1065	0.6413	met-a-599	8.52e-06	0.0164	TRUE	19.8677
rs7150140	C	T	C	T	0.934	-0.3789	0.4761	0.4262	met-a-599	3.96e-06	0.2025	TRUE	21.2737
rs7665221	C	T	C	T	0.0796	-0.1616	0.1248	0.1953	met-a-599	4.71e-06	0.0174	TRUE	20.928
rs7934379	T	C	T	C	0.934	-1.0356	3.1628	0.7433	met-a-599	3.96e-06	0.2025	TRUE	21.2737
rs9451887	G	A	G	A	0.934	1.5028	1.1986	0.2099	met-a-599	3.96e-06	0.2025	TRUE	21.2737
rs9466463	C	G	C	G	0.1372	-0.059	0.1586	0.7098	met-a-599	2.37e-06	0.0291	TRUE	22.2291
rs10510506	C	A	C	A	0.747	-0.1013	0.2087	0.627401	met-a-599	8.98e-06	0.1682	TRUE	19.7237
rs11563459	C	T	C	T	0.0914	-0.0407	0.1322	0.758099	met-a-599	5.78e-06	0.0202	TRUE	20.4734
rs12658525	T	C	T	C	0.1682	-0.2038	0.2166	0.3466	met-a-599	3.59e-06	0.0363	TRUE	21.4703
rs1322668	C	G	C	G	-0.0975	0.0136	0.1008	0.8923	met-a-599	3.92e-06	0.0211	TRUE	21.3523
rs16843794	C	T	C	T	0.7079	-0.2132	0.2437	0.3815	met-a-599	7.1e-07	0.1428	TRUE	24.5747
rs17082709	C	A	C	A	0.167	0.3082	0.1765	0.0808109	met-a-599	8.06e-06	0.0374	TRUE	19.9384
rs17091635	A	G	A	G	0.173	-0.6358	0.2792	0.0227898	met-a-599	2.93e-06	0.037	TRUE	21.8619
rs2292787	A	G	A	G	-0.6793	0.2938	0.149	0.0485803	met-a-599	6.93e-08	0.126	TRUE	29.0658
rs29766	A	G	A	G	0.1091	-0.3218	0.14	0.0215001	met-a-599	6.38e-06	0.0242	TRUE	20.3244
rs4670957	T	C	T	C	-0.0608	0.032	0.0812	0.6937	met-a-599	7.23e-06	0.0136	TRUE	19.9862
rs4822679	G	A	G	A	0.934	-1.0055	1.4891	0.499501	met-a-599	3.96e-06	0.2025	TRUE	21.2737
rs5998862	C	A	C	A	0.6716	0.0149	0.1872	0.9364	met-a-599	1.91e-06	0.141	TRUE	22.6873
rs6938476	T	C	T	C	0.0705	-0.13	0.0951	0.1719	met-a-599	5.38e-06	0.0155	TRUE	20.6878
rs7086346	A	G	A	G	0.0731	0.0496	0.1065	0.6413	met-a-599	8.52e-06	0.0164	TRUE	19.8677
rs7150140	C	T	C	T	0.934	-0.3789	0.4761	0.4262	met-a-599	3.96e-06	0.2025	TRUE	21.2737
rs7665221	C	T	C	T	0.0796	-0.1616	0.1248	0.1953	met-a-599	4.71e-06	0.0174	TRUE	20.928
rs7934379	T	C	T	C	0.934	-1.0356	3.1628	0.7433	met-a-599	3.96e-06	0.2025	TRUE	21.2737
rs9451887	G	A	G	A	0.934	1.5028	1.1986	0.2099	met-a-599	3.96e-06	0.2025	TRUE	21.2737
rs9466463	C	G	C	G	0.1372	-0.059	0.1586	0.7098	met-a-599	2.37e-06	0.0291	TRUE	22.2291
rs10510506	C	A	C	A	0.747	-0.1013	0.2087	0.627401	met-a-599	8.98e-06	0.1682	TRUE	19.7237
rs11563459	C	T	C	T	0.0914	-0.0407	0.1322	0.758099	met-a-599	5.78e-06	0.0202	TRUE	20.4734
rs12658525	T	C	T	C	0.1682	-0.2038	0.2166	0.3466	met-a-599	3.59e-06	0.0363	TRUE	21.4703
rs1322668	C	G	C	G	-0.0975	0.0136	0.1008	0.8923	met-a-599	3.92e-06	0.0211	TRUE	21.3523
rs16843794	C	T	C	T	0.7079	-0.2132	0.2437	0.3815	met-a-599	7.1e-07	0.1428	TRUE	24.5747
rs17082709	C	A	C	A	0.167	0.3082	0.1765	0.0808109	met-a-599	8.06e-06	0.0374	TRUE	19.9384
rs17091635	A	G	A	G	0.173	-0.6358	0.2792	0.0227898	met-a-599	2.93e-06	0.037	TRUE	21.8619
rs2292787	A	G	A	G	-0.6793	0.2938	0.149	0.0485803	met-a-599	6.93e-08	0.126	TRUE	29.0658
rs29766	A	G	A	G	0.1091	-0.3218	0.14	0.0215001	met-a-599	6.38e-06	0.0242	TRUE	20.3244
rs4670957	T	C	T	C	-0.0608	0.032	0.0812	0.6937	met-a-599	7.23e-06	0.0136	TRUE	19.9862
rs4822679	G	A	G	A	0.934	-1.0055	1.4891	0.499501	met-a-599	3.96e-06	0.2025	TRUE	21.2737
rs5998862	C	A	C	A	0.6716	0.0149	0.1872	0.9364	met-a-599	1.91e-06	0.141	TRUE	22.6873
rs6938476	T	C	T	C	0.0705	-0.13	0.0951	0.1719	met-a-599	5.38e-06	0.0155	TRUE	20.6878
rs7086346	A	G	A	G	0.0731	0.0496	0.1065	0.6413	met-a-599	8.52e-06	0.0164	TRUE	19.8677
rs7150140	C	T	C	T	0.934	-0.3789	0.4761	0.4262	met-a-599	3.96e-06	0.2025	TRUE	21.2737
rs7665221	C	T	C	T	0.0796	-0.1616	0.1248	0.1953	met-a-599	4.71e-06	0.0174	TRUE	20.928
rs7934379	T	C	T	C	0.934	-1.0356	3.1628	0.7433	met-a-599	3.96e-06	0.2025	TRUE	21.2737
rs9451887	G	A	G	A	0.934	1.5028	1.1986	0.2099	met-a-599	3.96e-06	0.2025	TRUE	21.2737
rs9466463	C	G	C	G	0.1372	-0.059	0.1586	0.7098	met-a-599	2.37e-06	0.0291	TRUE	22.2291
rs10510506	C	A	C	A	0.747	-0.1013	0.2087	0.627401	met-a-599	8.98e-06	0.1682	TRUE	19.7237
rs11563459	C	T	C	T	0.0914	-0.0407	0.1322	0.758099	met-a-599	5.78e-06	0.0202	TRUE	20.4734
rs12658525	T	C	T	C	0.1682	-0.2038	0.2166	0.3466	met-a-599	3.59e-06	0.0363	TRUE	21.4703
rs1322668	C	G	C	G	-0.0975	0.0136	0.1008	0.8923	met-a-599	3.92e-06	0.0211	TRUE	21.3523
rs16843794	C	T	C	T	0.7079	-0.2132	0.2437	0.3815	met-a-599	7.1e-07	0.1428	TRUE	24.5747
rs17082709	C	A	C	A	0.167	0.3082	0.1765	0.0808109	met-a-599	8.06e-06	0.0374	TRUE	19.9384
rs17091635	A	G	A	G	0.173	-0.6358	0.2792	0.0227898	met-a-599	2.93e-06	0.037	TRUE	21.8619
rs2292787	A	G	A	G	-0.6793	0.2938	0.149	0.0485803	met-a-599	6.93e-08	0.126	TRUE	29.0658
rs29766	A	G	A	G	0.1091	-0.3218	0.14	0.0215001	met-a-599	6.38e-06	0.0242	TRUE	20.3244
rs4670957	T	C	T	C	-0.0608	0.032	0.0812	0.6937	met-a-599	7.23e-06	0.0136	TRUE	19.9862
rs4822679	G	A	G	A	0.934	-1.0055	1.4891	0.499501	met-a-599	3.96e-06	0.2025	TRUE	21.2737
rs5998862	C	A	C	A	0.6716	0.0149	0.1872	0.9364	met-a-599	1.91e-06	0.141	TRUE	22.6873
rs6938476	T	C	T	C	0.0705	-0.13	0.0951	0.1719	met-a-599	5.38e-06	0.0155	TRUE	20.6878
rs7086346	A	G	A	G	0.0731	0.0496	0.1065	0.6413	met-a-599	8.52e-06	0.0164	TRUE	19.8677
rs7150140	C	T	C	T	0.934	-0.3789	0.4761	0.4262	met-a-599	3.96e-06	0.2025	TRUE	21.2737
rs7665221	C	T	C	T	0.0796	-0.1616	0.1248	0.1953	met-a-599	4.71e-06	0.0174	TRUE	20.928
rs7934379	T	C	T	C	0.934	-1.0356	3.1628	0.7433	met-a-599	3.96e-06	0.2025	TRUE	21.2737
rs9451887	G	A	G	A	0.934	1.5028	1.1986	0.2099	met-a-599	3.96e-06	0.2025	TRUE	21.2737
rs9466463	C	G	C	G	0.1372	-0.059	0.1586	0.7098	met-a-599	2.37e-06	0.0291	TRUE	22.2291
rs10510506	C	A	C	A	0.747	-0.1013	0.2087	0.627401	met-a-599	8.98e-06	0.1682	TRUE	19.7237
rs11563459	C	T	C	T	0.0914	-0.0407	0.1322	0.758099	met-a-599	5.78e-06	0.0202	TRUE	20.4734
rs12658525	T	C	T	C	0.1682	-0.2038	0.2166	0.3466	met-a-599	3.59e-06	0.0363	TRUE	21.4703
rs1322668	C	G	C	G	-0.0975	0.0136	0.1008	0.8923	met-a-599	3.92e-06	0.0211	TRUE	21.3523
rs16843794	C	T	C	T	0.7079	-0.2132	0.2437	0.3815	met-a-599	7.1e-07	0.1428	TRUE	24.5747
rs17082709	C	A	C	A	0.167	0.3082	0.1765	0.0808109	met-a-599	8.06e-06	0.0374	TRUE	19.9384
rs17091635	A	G	A	G	0.173	-0.6358	0.2792	0.0227898	met-a-599	2.93e-06	0.037	TRUE	21.8619
rs2292787	A	G	A	G	-0.6793	0.2938	0.149	0.0485803	met-a-599	6.93e-08	0.126	TRUE	29.0658
rs29766	A	G	A	G	0.1091	-0.3218	0.14	0.0215001	met-a-599	6.38e-06	0.0242	TRUE	20.3244
rs4670957	T	C	T	C	-0.0608	0.032	0.0812	0.6937	met-a-599	7.23e-06	0.0136	TRUE	19.9862
rs4822679	G	A	G	A	0.934	-1.0055	1.4891	0.499501	met-a-599	3.96e-06	0.2025	TRUE	21.2737
rs5998862	C	A	C	A	0.6716	0.0149	0.1872	0.9364	met-a-599	1.91e-06	0.141	TRUE	22.6873
rs6938476	T	C	T	C	0.0705	-0.13	0.0951	0.1719	met-a-599	5.38e-06	0.0155	TRUE	20.6878
rs7086346	A	G	A	G	0.0731	0.0496	0.1065	0.6413	met-a-599	8.52e-06	0.0164	TRUE	19.8677
rs7150140	C	T	C	T	0.934	-0.3789	0.4761	0.4262	met-a-599	3.96e-06	0.2025	TRUE	21.2737
rs7665221	C	T	C	T	0.0796	-0.1616	0.1248	0.1953	met-a-599	4.71e-06	0.0174	TRUE	20.928
rs7934379	T	C	T	C	0.934	-1.0356	3.1628	0.7433	met-a-599	3.96e-06	0.2025	TRUE	21.2737
rs9451887	G	A	G	A	0.934	1.5028	1.1986	0.2099	met-a-599	3.96e-06	0.2025	TRUE	21.2737
rs9466463	C	G	C	G	0.1372	-0.059	0.1586	0.7098	met-a-599	2.37e-06	0.0291	TRUE	22.2291
rs11151591	C	A	C	A	-0.0213	0.1523	0.0876	0.0819691	met-a-616	4.11e-06	0.0046	TRUE	21.4409
rs11953823	T	C	T	C	0.0326	-0.0364	0.0907	0.688101	met-a-616	6.54e-06	0.0072	TRUE	20.5008
rs12416821	G	A	G	A	0.0262	-0.0032	0.0839	0.9696	met-a-616	1.7e-09	0.0043	TRUE	37.1249
rs16892052	C	G	C	G	0.0775	0.2219	0.5555	0.6895	met-a-616	3.81e-06	0.0168	TRUE	21.2806
rs1935248	T	C	T	C	-0.0179	-0.0404	0.0849	0.6339	met-a-616	7.17e-07	0.0036	TRUE	24.723
rs2906973	T	A	T	A	0.0468	-0.3764	0.2341	0.1078	met-a-616	8.26e-07	0.0095	TRUE	24.2686
rs3125596	G	A	G	A	0.0542	-0.2155	0.1359	0.1128	met-a-616	2.39e-06	0.0115	TRUE	22.2128
rs320265	T	C	T	C	-0.0331	-0.0312	0.1126	0.7819	met-a-616	2.45e-06	0.007	TRUE	22.3594
rs3772474	G	T	G	T	0.0283	-0.0579	0.1841	0.752899	met-a-616	8.74e-06	0.0064	TRUE	19.553
rs4150563	G	T	G	T	-0.0337	0.0148	0.0903	0.8694	met-a-616	8.01e-13	0.0047	TRUE	51.412
rs4328432	A	G	A	G	0.0207	-0.2118	0.1049	0.0435803	met-a-616	5.5e-06	0.0046	TRUE	20.25
rs480547	C	G	C	G	0.0162	-0.0736	0.0823	0.371	met-a-616	5.35e-06	0.0035	FALSE	21.4237
rs7933681	A	G	A	G	0.0267	-0.0171	0.1382	0.9018	met-a-616	5.57e-06	0.0059	TRUE	20.4795
rs893971	G	A	G	A	0.0197	-0.0745	0.0847	0.3791	met-a-616	4.05e-08	0.0036	TRUE	29.9452
rs11151591	C	A	C	A	-0.0213	0.1523	0.0876	0.0819691	met-a-616	4.11e-06	0.0046	TRUE	21.4409
rs11953823	T	C	T	C	0.0326	-0.0364	0.0907	0.688101	met-a-616	6.54e-06	0.0072	TRUE	20.5008
rs12416821	G	A	G	A	0.0262	-0.0032	0.0839	0.9696	met-a-616	1.7e-09	0.0043	TRUE	37.1249
rs16892052	C	G	C	G	0.0775	0.2219	0.5555	0.6895	met-a-616	3.81e-06	0.0168	TRUE	21.2806
rs1935248	T	C	T	C	-0.0179	-0.0404	0.0849	0.6339	met-a-616	7.17e-07	0.0036	TRUE	24.723
rs2906973	T	A	T	A	0.0468	-0.3764	0.2341	0.1078	met-a-616	8.26e-07	0.0095	TRUE	24.2686
rs3125596	G	A	G	A	0.0542	-0.2155	0.1359	0.1128	met-a-616	2.39e-06	0.0115	TRUE	22.2128
rs320265	T	C	T	C	-0.0331	-0.0312	0.1126	0.7819	met-a-616	2.45e-06	0.007	TRUE	22.3594
rs3772474	G	T	G	T	0.0283	-0.0579	0.1841	0.752899	met-a-616	8.74e-06	0.0064	TRUE	19.553
rs4150563	G	T	G	T	-0.0337	0.0148	0.0903	0.8694	met-a-616	8.01e-13	0.0047	TRUE	51.412
rs4328432	A	G	A	G	0.0207	-0.2118	0.1049	0.0435803	met-a-616	5.5e-06	0.0046	TRUE	20.25
rs480547	C	G	C	G	0.0162	-0.0736	0.0823	0.371	met-a-616	5.35e-06	0.0035	FALSE	21.4237
rs7933681	A	G	A	G	0.0267	-0.0171	0.1382	0.9018	met-a-616	5.57e-06	0.0059	TRUE	20.4795
rs893971	G	A	G	A	0.0197	-0.0745	0.0847	0.3791	met-a-616	4.05e-08	0.0036	TRUE	29.9452
rs11151591	C	A	C	A	-0.0213	0.1523	0.0876	0.0819691	met-a-616	4.11e-06	0.0046	TRUE	21.4409
rs11953823	T	C	T	C	0.0326	-0.0364	0.0907	0.688101	met-a-616	6.54e-06	0.0072	TRUE	20.5008
rs12416821	G	A	G	A	0.0262	-0.0032	0.0839	0.9696	met-a-616	1.7e-09	0.0043	TRUE	37.1249
rs16892052	C	G	C	G	0.0775	0.2219	0.5555	0.6895	met-a-616	3.81e-06	0.0168	TRUE	21.2806
rs1935248	T	C	T	C	-0.0179	-0.0404	0.0849	0.6339	met-a-616	7.17e-07	0.0036	TRUE	24.723
rs2906973	T	A	T	A	0.0468	-0.3764	0.2341	0.1078	met-a-616	8.26e-07	0.0095	TRUE	24.2686
rs3125596	G	A	G	A	0.0542	-0.2155	0.1359	0.1128	met-a-616	2.39e-06	0.0115	TRUE	22.2128
rs320265	T	C	T	C	-0.0331	-0.0312	0.1126	0.7819	met-a-616	2.45e-06	0.007	TRUE	22.3594
rs3772474	G	T	G	T	0.0283	-0.0579	0.1841	0.752899	met-a-616	8.74e-06	0.0064	TRUE	19.553
rs4150563	G	T	G	T	-0.0337	0.0148	0.0903	0.8694	met-a-616	8.01e-13	0.0047	TRUE	51.412
rs4328432	A	G	A	G	0.0207	-0.2118	0.1049	0.0435803	met-a-616	5.5e-06	0.0046	TRUE	20.25
rs480547	C	G	C	G	0.0162	-0.0736	0.0823	0.371	met-a-616	5.35e-06	0.0035	FALSE	21.4237
rs7933681	A	G	A	G	0.0267	-0.0171	0.1382	0.9018	met-a-616	5.57e-06	0.0059	TRUE	20.4795
rs893971	G	A	G	A	0.0197	-0.0745	0.0847	0.3791	met-a-616	4.05e-08	0.0036	TRUE	29.9452
rs11151591	C	A	C	A	-0.0213	0.1523	0.0876	0.0819691	met-a-616	4.11e-06	0.0046	TRUE	21.4409
rs11953823	T	C	T	C	0.0326	-0.0364	0.0907	0.688101	met-a-616	6.54e-06	0.0072	TRUE	20.5008
rs12416821	G	A	G	A	0.0262	-0.0032	0.0839	0.9696	met-a-616	1.7e-09	0.0043	TRUE	37.1249
rs16892052	C	G	C	G	0.0775	0.2219	0.5555	0.6895	met-a-616	3.81e-06	0.0168	TRUE	21.2806
rs1935248	T	C	T	C	-0.0179	-0.0404	0.0849	0.6339	met-a-616	7.17e-07	0.0036	TRUE	24.723
rs2906973	T	A	T	A	0.0468	-0.3764	0.2341	0.1078	met-a-616	8.26e-07	0.0095	TRUE	24.2686
rs3125596	G	A	G	A	0.0542	-0.2155	0.1359	0.1128	met-a-616	2.39e-06	0.0115	TRUE	22.2128
rs320265	T	C	T	C	-0.0331	-0.0312	0.1126	0.7819	met-a-616	2.45e-06	0.007	TRUE	22.3594
rs3772474	G	T	G	T	0.0283	-0.0579	0.1841	0.752899	met-a-616	8.74e-06	0.0064	TRUE	19.553
rs4150563	G	T	G	T	-0.0337	0.0148	0.0903	0.8694	met-a-616	8.01e-13	0.0047	TRUE	51.412
rs4328432	A	G	A	G	0.0207	-0.2118	0.1049	0.0435803	met-a-616	5.5e-06	0.0046	TRUE	20.25
rs480547	C	G	C	G	0.0162	-0.0736	0.0823	0.371	met-a-616	5.35e-06	0.0035	FALSE	21.4237
rs7933681	A	G	A	G	0.0267	-0.0171	0.1382	0.9018	met-a-616	5.57e-06	0.0059	TRUE	20.4795
rs893971	G	A	G	A	0.0197	-0.0745	0.0847	0.3791	met-a-616	4.05e-08	0.0036	TRUE	29.9452
rs11151591	C	A	C	A	-0.0213	0.1523	0.0876	0.0819691	met-a-616	4.11e-06	0.0046	TRUE	21.4409
rs11953823	T	C	T	C	0.0326	-0.0364	0.0907	0.688101	met-a-616	6.54e-06	0.0072	TRUE	20.5008
rs12416821	G	A	G	A	0.0262	-0.0032	0.0839	0.9696	met-a-616	1.7e-09	0.0043	TRUE	37.1249
rs16892052	C	G	C	G	0.0775	0.2219	0.5555	0.6895	met-a-616	3.81e-06	0.0168	TRUE	21.2806
rs1935248	T	C	T	C	-0.0179	-0.0404	0.0849	0.6339	met-a-616	7.17e-07	0.0036	TRUE	24.723
rs2906973	T	A	T	A	0.0468	-0.3764	0.2341	0.1078	met-a-616	8.26e-07	0.0095	TRUE	24.2686
rs3125596	G	A	G	A	0.0542	-0.2155	0.1359	0.1128	met-a-616	2.39e-06	0.0115	TRUE	22.2128
rs320265	T	C	T	C	-0.0331	-0.0312	0.1126	0.7819	met-a-616	2.45e-06	0.007	TRUE	22.3594
rs3772474	G	T	G	T	0.0283	-0.0579	0.1841	0.752899	met-a-616	8.74e-06	0.0064	TRUE	19.553
rs4150563	G	T	G	T	-0.0337	0.0148	0.0903	0.8694	met-a-616	8.01e-13	0.0047	TRUE	51.412
rs4328432	A	G	A	G	0.0207	-0.2118	0.1049	0.0435803	met-a-616	5.5e-06	0.0046	TRUE	20.25
rs480547	C	G	C	G	0.0162	-0.0736	0.0823	0.371	met-a-616	5.35e-06	0.0035	FALSE	21.4237
rs7933681	A	G	A	G	0.0267	-0.0171	0.1382	0.9018	met-a-616	5.57e-06	0.0059	TRUE	20.4795
rs893971	G	A	G	A	0.0197	-0.0745	0.0847	0.3791	met-a-616	4.05e-08	0.0036	TRUE	29.9452
rs10520079	A	G	A	G	-0.0167	-0.2546	0.0989	0.01007	met-a-652	1.36e-06	0.0034	TRUE	24.1254
rs10947808	C	T	C	T	0.0174	-0.1256	0.1007	0.2123	met-a-652	1.21e-06	0.0036	TRUE	23.3611
rs154484	T	C	T	C	0.0194	0.0578	0.0963	0.5487	met-a-652	5.19e-06	0.0043	TRUE	20.3548
rs16874160	G	A	G	A	-0.137	0.0808	0.1811	0.6555	met-a-652	4.49e-07	0.0272	TRUE	25.369
rs17672041	T	C	T	C	0.0298	0.0291	0.1147	0.7998	met-a-652	1.31e-11	0.0044	TRUE	45.8698
rs2291449	G	A	G	A	0.0288	0.0805	0.1238	0.5157	met-a-652	2.35e-08	0.0052	TRUE	30.6746
rs247011	A	G	A	G	0.021	0.2553	0.0945	0.00689001	met-a-652	3.86e-09	0.0036	TRUE	34.0278
rs274561	A	C	A	C	0.0383	0.2187	0.0817	0.00740491	met-a-652	2.12e-31	0.0033	TRUE	134.701
rs2852371	G	A	G	A	-0.0126	0.028	0.0824	0.7338	met-a-652	3.97e-06	0.0027	TRUE	21.7778
rs2963485	T	C	T	C	-0.0175	-0.0803	0.1189	0.499501	met-a-652	1.06e-06	0.0036	TRUE	23.6304
rs3857440	A	G	A	G	0.02	0.2186	0.0851	0.01024	met-a-652	8.17e-09	0.0035	TRUE	32.6531
rs4706020	A	G	A	G	-0.0214	-0.2714	0.0926	0.00337101	met-a-652	3.8e-10	0.0034	TRUE	39.6159
rs6596022	C	T	C	T	-0.0454	-0.5536	0.3405	0.1039	met-a-652	6.82e-09	0.0078	TRUE	33.8784
rs6803918	A	G	A	G	-0.0303	-0.0337	0.0957	0.725	met-a-652	4.65e-06	0.0066	TRUE	21.0764
rs7711551	C	T	C	T	-0.0484	-0.5071	0.358	0.1567	met-a-652	5.19e-08	0.0089	TRUE	29.574
rs9635324	G	A	G	A	-0.0337	-0.2264	0.0818	0.00564001	met-a-652	1.89e-35	0.0027	TRUE	155.787
rs9775485	C	T	C	T	0.0144	0.0346	0.0868	0.690699	met-a-652	2e-07	0.0028	TRUE	26.449
rs10520079	A	G	A	G	-0.0167	-0.2546	0.0989	0.01007	met-a-652	1.36e-06	0.0034	TRUE	24.1254
rs10947808	C	T	C	T	0.0174	-0.1256	0.1007	0.2123	met-a-652	1.21e-06	0.0036	TRUE	23.3611
rs154484	T	C	T	C	0.0194	0.0578	0.0963	0.5487	met-a-652	5.19e-06	0.0043	TRUE	20.3548
rs16874160	G	A	G	A	-0.137	0.0808	0.1811	0.6555	met-a-652	4.49e-07	0.0272	TRUE	25.369
rs17672041	T	C	T	C	0.0298	0.0291	0.1147	0.7998	met-a-652	1.31e-11	0.0044	TRUE	45.8698
rs2291449	G	A	G	A	0.0288	0.0805	0.1238	0.5157	met-a-652	2.35e-08	0.0052	TRUE	30.6746
rs247011	A	G	A	G	0.021	0.2553	0.0945	0.00689001	met-a-652	3.86e-09	0.0036	TRUE	34.0278
rs274561	A	C	A	C	0.0383	0.2187	0.0817	0.00740491	met-a-652	2.12e-31	0.0033	TRUE	134.701
rs2852371	G	A	G	A	-0.0126	0.028	0.0824	0.7338	met-a-652	3.97e-06	0.0027	TRUE	21.7778
rs2963485	T	C	T	C	-0.0175	-0.0803	0.1189	0.499501	met-a-652	1.06e-06	0.0036	TRUE	23.6304
rs3857440	A	G	A	G	0.02	0.2186	0.0851	0.01024	met-a-652	8.17e-09	0.0035	TRUE	32.6531
rs4706020	A	G	A	G	-0.0214	-0.2714	0.0926	0.00337101	met-a-652	3.8e-10	0.0034	TRUE	39.6159
rs6596022	C	T	C	T	-0.0454	-0.5536	0.3405	0.1039	met-a-652	6.82e-09	0.0078	TRUE	33.8784
rs6803918	A	G	A	G	-0.0303	-0.0337	0.0957	0.725	met-a-652	4.65e-06	0.0066	TRUE	21.0764
rs7711551	C	T	C	T	-0.0484	-0.5071	0.358	0.1567	met-a-652	5.19e-08	0.0089	TRUE	29.574
rs9635324	G	A	G	A	-0.0337	-0.2264	0.0818	0.00564001	met-a-652	1.89e-35	0.0027	TRUE	155.787
rs9775485	C	T	C	T	0.0144	0.0346	0.0868	0.690699	met-a-652	2e-07	0.0028	TRUE	26.449
rs10520079	A	G	A	G	-0.0167	-0.2546	0.0989	0.01007	met-a-652	1.36e-06	0.0034	TRUE	24.1254
rs10947808	C	T	C	T	0.0174	-0.1256	0.1007	0.2123	met-a-652	1.21e-06	0.0036	TRUE	23.3611
rs154484	T	C	T	C	0.0194	0.0578	0.0963	0.5487	met-a-652	5.19e-06	0.0043	TRUE	20.3548
rs16874160	G	A	G	A	-0.137	0.0808	0.1811	0.6555	met-a-652	4.49e-07	0.0272	TRUE	25.369
rs17672041	T	C	T	C	0.0298	0.0291	0.1147	0.7998	met-a-652	1.31e-11	0.0044	TRUE	45.8698
rs2291449	G	A	G	A	0.0288	0.0805	0.1238	0.5157	met-a-652	2.35e-08	0.0052	TRUE	30.6746
rs247011	A	G	A	G	0.021	0.2553	0.0945	0.00689001	met-a-652	3.86e-09	0.0036	TRUE	34.0278
rs274561	A	C	A	C	0.0383	0.2187	0.0817	0.00740491	met-a-652	2.12e-31	0.0033	TRUE	134.701
rs2852371	G	A	G	A	-0.0126	0.028	0.0824	0.7338	met-a-652	3.97e-06	0.0027	TRUE	21.7778
rs2963485	T	C	T	C	-0.0175	-0.0803	0.1189	0.499501	met-a-652	1.06e-06	0.0036	TRUE	23.6304
rs3857440	A	G	A	G	0.02	0.2186	0.0851	0.01024	met-a-652	8.17e-09	0.0035	TRUE	32.6531
rs4706020	A	G	A	G	-0.0214	-0.2714	0.0926	0.00337101	met-a-652	3.8e-10	0.0034	TRUE	39.6159
rs6596022	C	T	C	T	-0.0454	-0.5536	0.3405	0.1039	met-a-652	6.82e-09	0.0078	TRUE	33.8784
rs6803918	A	G	A	G	-0.0303	-0.0337	0.0957	0.725	met-a-652	4.65e-06	0.0066	TRUE	21.0764
rs7711551	C	T	C	T	-0.0484	-0.5071	0.358	0.1567	met-a-652	5.19e-08	0.0089	TRUE	29.574
rs9635324	G	A	G	A	-0.0337	-0.2264	0.0818	0.00564001	met-a-652	1.89e-35	0.0027	TRUE	155.787
rs9775485	C	T	C	T	0.0144	0.0346	0.0868	0.690699	met-a-652	2e-07	0.0028	TRUE	26.449
rs10520079	A	G	A	G	-0.0167	-0.2546	0.0989	0.01007	met-a-652	1.36e-06	0.0034	TRUE	24.1254
rs10947808	C	T	C	T	0.0174	-0.1256	0.1007	0.2123	met-a-652	1.21e-06	0.0036	TRUE	23.3611
rs154484	T	C	T	C	0.0194	0.0578	0.0963	0.5487	met-a-652	5.19e-06	0.0043	TRUE	20.3548
rs16874160	G	A	G	A	-0.137	0.0808	0.1811	0.6555	met-a-652	4.49e-07	0.0272	TRUE	25.369
rs17672041	T	C	T	C	0.0298	0.0291	0.1147	0.7998	met-a-652	1.31e-11	0.0044	TRUE	45.8698
rs2291449	G	A	G	A	0.0288	0.0805	0.1238	0.5157	met-a-652	2.35e-08	0.0052	TRUE	30.6746
rs247011	A	G	A	G	0.021	0.2553	0.0945	0.00689001	met-a-652	3.86e-09	0.0036	TRUE	34.0278
rs274561	A	C	A	C	0.0383	0.2187	0.0817	0.00740491	met-a-652	2.12e-31	0.0033	TRUE	134.701
rs2852371	G	A	G	A	-0.0126	0.028	0.0824	0.7338	met-a-652	3.97e-06	0.0027	TRUE	21.7778
rs2963485	T	C	T	C	-0.0175	-0.0803	0.1189	0.499501	met-a-652	1.06e-06	0.0036	TRUE	23.6304
rs3857440	A	G	A	G	0.02	0.2186	0.0851	0.01024	met-a-652	8.17e-09	0.0035	TRUE	32.6531
rs4706020	A	G	A	G	-0.0214	-0.2714	0.0926	0.00337101	met-a-652	3.8e-10	0.0034	TRUE	39.6159
rs6596022	C	T	C	T	-0.0454	-0.5536	0.3405	0.1039	met-a-652	6.82e-09	0.0078	TRUE	33.8784
rs6803918	A	G	A	G	-0.0303	-0.0337	0.0957	0.725	met-a-652	4.65e-06	0.0066	TRUE	21.0764
rs7711551	C	T	C	T	-0.0484	-0.5071	0.358	0.1567	met-a-652	5.19e-08	0.0089	TRUE	29.574
rs9635324	G	A	G	A	-0.0337	-0.2264	0.0818	0.00564001	met-a-652	1.89e-35	0.0027	TRUE	155.787
rs9775485	C	T	C	T	0.0144	0.0346	0.0868	0.690699	met-a-652	2e-07	0.0028	TRUE	26.449
rs10520079	A	G	A	G	-0.0167	-0.2546	0.0989	0.01007	met-a-652	1.36e-06	0.0034	TRUE	24.1254
rs10947808	C	T	C	T	0.0174	-0.1256	0.1007	0.2123	met-a-652	1.21e-06	0.0036	TRUE	23.3611
rs154484	T	C	T	C	0.0194	0.0578	0.0963	0.5487	met-a-652	5.19e-06	0.0043	TRUE	20.3548
rs16874160	G	A	G	A	-0.137	0.0808	0.1811	0.6555	met-a-652	4.49e-07	0.0272	TRUE	25.369
rs17672041	T	C	T	C	0.0298	0.0291	0.1147	0.7998	met-a-652	1.31e-11	0.0044	TRUE	45.8698
rs2291449	G	A	G	A	0.0288	0.0805	0.1238	0.5157	met-a-652	2.35e-08	0.0052	TRUE	30.6746
rs247011	A	G	A	G	0.021	0.2553	0.0945	0.00689001	met-a-652	3.86e-09	0.0036	TRUE	34.0278
rs274561	A	C	A	C	0.0383	0.2187	0.0817	0.00740491	met-a-652	2.12e-31	0.0033	TRUE	134.701
rs2852371	G	A	G	A	-0.0126	0.028	0.0824	0.7338	met-a-652	3.97e-06	0.0027	TRUE	21.7778
rs2963485	T	C	T	C	-0.0175	-0.0803	0.1189	0.499501	met-a-652	1.06e-06	0.0036	TRUE	23.6304
rs3857440	A	G	A	G	0.02	0.2186	0.0851	0.01024	met-a-652	8.17e-09	0.0035	TRUE	32.6531
rs4706020	A	G	A	G	-0.0214	-0.2714	0.0926	0.00337101	met-a-652	3.8e-10	0.0034	TRUE	39.6159
rs6596022	C	T	C	T	-0.0454	-0.5536	0.3405	0.1039	met-a-652	6.82e-09	0.0078	TRUE	33.8784
rs6803918	A	G	A	G	-0.0303	-0.0337	0.0957	0.725	met-a-652	4.65e-06	0.0066	TRUE	21.0764
rs7711551	C	T	C	T	-0.0484	-0.5071	0.358	0.1567	met-a-652	5.19e-08	0.0089	TRUE	29.574
rs9635324	G	A	G	A	-0.0337	-0.2264	0.0818	0.00564001	met-a-652	1.89e-35	0.0027	TRUE	155.787
rs9775485	C	T	C	T	0.0144	0.0346	0.0868	0.690699	met-a-652	2e-07	0.0028	TRUE	26.449
rs11578466	G	C	G	C	0.0251	-0.1524	0.13	0.241	met-a-735	8.4e-06	0.0056	TRUE	20.0896
rs11733714	T	C	T	C	-0.0704	0.2042	0.2159	0.3442	met-a-735	2.47e-06	0.0149	TRUE	22.324
rs11852566	T	C	T	C	-0.0253	-0.0046	0.1589	0.9767	met-a-735	7.9e-06	0.0057	TRUE	19.7011
rs12829704	A	G	A	G	-0.042	0.0693	0.1216	0.569101	met-a-735	9.49e-21	0.0045	TRUE	87.1111
rs1871395	G	A	G	A	0.0309	-0.1581	0.0907	0.0812999	met-a-735	8.68e-10	0.005	TRUE	38.1924
rs2108622	T	C	T	C	-0.0248	0.1097	0.1027	0.2854	met-a-735	1.2e-08	0.0044	TRUE	31.7686
rs2161480	G	C	G	C	-0.07	0.4519	0.2104	0.0317497	met-a-735	8.79e-06	0.0157	TRUE	19.8791
rs3794989	T	C	T	C	0.0165	0.1637	0.0851	0.0544402	met-a-735	4.95e-06	0.0036	TRUE	21.0069
rs11578466	G	C	G	C	0.0251	-0.1524	0.13	0.241	met-a-735	8.4e-06	0.0056	TRUE	20.0896
rs11733714	T	C	T	C	-0.0704	0.2042	0.2159	0.3442	met-a-735	2.47e-06	0.0149	TRUE	22.324
rs11852566	T	C	T	C	-0.0253	-0.0046	0.1589	0.9767	met-a-735	7.9e-06	0.0057	TRUE	19.7011
rs12829704	A	G	A	G	-0.042	0.0693	0.1216	0.569101	met-a-735	9.49e-21	0.0045	TRUE	87.1111
rs1871395	G	A	G	A	0.0309	-0.1581	0.0907	0.0812999	met-a-735	8.68e-10	0.005	TRUE	38.1924
rs2108622	T	C	T	C	-0.0248	0.1097	0.1027	0.2854	met-a-735	1.2e-08	0.0044	TRUE	31.7686
rs2161480	G	C	G	C	-0.07	0.4519	0.2104	0.0317497	met-a-735	8.79e-06	0.0157	TRUE	19.8791
rs3794989	T	C	T	C	0.0165	0.1637	0.0851	0.0544402	met-a-735	4.95e-06	0.0036	TRUE	21.0069
rs11578466	G	C	G	C	0.0251	-0.1524	0.13	0.241	met-a-735	8.4e-06	0.0056	TRUE	20.0896
rs11733714	T	C	T	C	-0.0704	0.2042	0.2159	0.3442	met-a-735	2.47e-06	0.0149	TRUE	22.324
rs11852566	T	C	T	C	-0.0253	-0.0046	0.1589	0.9767	met-a-735	7.9e-06	0.0057	TRUE	19.7011
rs12829704	A	G	A	G	-0.042	0.0693	0.1216	0.569101	met-a-735	9.49e-21	0.0045	TRUE	87.1111
rs1871395	G	A	G	A	0.0309	-0.1581	0.0907	0.0812999	met-a-735	8.68e-10	0.005	TRUE	38.1924
rs2108622	T	C	T	C	-0.0248	0.1097	0.1027	0.2854	met-a-735	1.2e-08	0.0044	TRUE	31.7686
rs2161480	G	C	G	C	-0.07	0.4519	0.2104	0.0317497	met-a-735	8.79e-06	0.0157	TRUE	19.8791
rs3794989	T	C	T	C	0.0165	0.1637	0.0851	0.0544402	met-a-735	4.95e-06	0.0036	TRUE	21.0069
rs11578466	G	C	G	C	0.0251	-0.1524	0.13	0.241	met-a-735	8.4e-06	0.0056	TRUE	20.0896
rs11733714	T	C	T	C	-0.0704	0.2042	0.2159	0.3442	met-a-735	2.47e-06	0.0149	TRUE	22.324
rs11852566	T	C	T	C	-0.0253	-0.0046	0.1589	0.9767	met-a-735	7.9e-06	0.0057	TRUE	19.7011
rs12829704	A	G	A	G	-0.042	0.0693	0.1216	0.569101	met-a-735	9.49e-21	0.0045	TRUE	87.1111
rs1871395	G	A	G	A	0.0309	-0.1581	0.0907	0.0812999	met-a-735	8.68e-10	0.005	TRUE	38.1924
rs2108622	T	C	T	C	-0.0248	0.1097	0.1027	0.2854	met-a-735	1.2e-08	0.0044	TRUE	31.7686
rs2161480	G	C	G	C	-0.07	0.4519	0.2104	0.0317497	met-a-735	8.79e-06	0.0157	TRUE	19.8791
rs3794989	T	C	T	C	0.0165	0.1637	0.0851	0.0544402	met-a-735	4.95e-06	0.0036	TRUE	21.0069
rs11578466	G	C	G	C	0.0251	-0.1524	0.13	0.241	met-a-735	8.4e-06	0.0056	TRUE	20.0896
rs11733714	T	C	T	C	-0.0704	0.2042	0.2159	0.3442	met-a-735	2.47e-06	0.0149	TRUE	22.324
rs11852566	T	C	T	C	-0.0253	-0.0046	0.1589	0.9767	met-a-735	7.9e-06	0.0057	TRUE	19.7011
rs12829704	A	G	A	G	-0.042	0.0693	0.1216	0.569101	met-a-735	9.49e-21	0.0045	TRUE	87.1111
rs1871395	G	A	G	A	0.0309	-0.1581	0.0907	0.0812999	met-a-735	8.68e-10	0.005	TRUE	38.1924
rs2108622	T	C	T	C	-0.0248	0.1097	0.1027	0.2854	met-a-735	1.2e-08	0.0044	TRUE	31.7686
rs2161480	G	C	G	C	-0.07	0.4519	0.2104	0.0317497	met-a-735	8.79e-06	0.0157	TRUE	19.8791
rs3794989	T	C	T	C	0.0165	0.1637	0.0851	0.0544402	met-a-735	4.95e-06	0.0036	TRUE	21.0069
